# Supplementary material for: COVID-19 research risks ignoring important host genes due to pre-established research patterns
Source: eLife. 2020 Nov 24;9:e61981. doi: 10.7554/eLife.61981 (PMC7685703; doi:10.7554/eLife.61981)
Supplement: Supplementary file 1. [file elife-61981-supp1.xlsx]

## Sheet: stable_1_functional_enrichment
Category	Term	Count	%	PValue	Genes	List Total	Pop Hits	Pop Total	Fold Enrichment	Bonferroni	Benjamini	FDR
GOTERM_CC_DIRECT	GO:0005615~extracellular space	610	16.3407	8.96509e-107	653509, 3881, 22871, 51083, 5817, 10417, 3512, 284217, 2662, 57509, 3630, 3892, 1473, 1471, 729238, 54360, 1, 2678, 2796, 56300, 4852, 3886, 928, 929, 2331, 1363, 2694, 1360, 2691, 2690, 79792, 1118, 1359, 3416, 1116, 2688, 1356, 1113, 2323, 1476, 1475, 2200, 2321, 931, 811, 10631, 5730, 5972, 3552, 1490, 10404, 10406, 1369, 3426, 1368, 1489, 2335, 820, 2695, 944, 4878, 948, 4879, 3684, 5741, 344…	3662	1309	17735	2.25685	1.01126e-103	1.01126e-103	9.2699e-104
GOTERM_BP_DIRECT	GO:0006955~immune response	235	6.2952	2.18536e-71	6351, 8530, 909, 8771, 6352, 6355, 4055, 6357, 6356, 29949, 6590, 4050, 5818, 1215, 355, 356, 3512, 6348, 6347, 4049, 913, 10410, 6362, 5393, 8784, 6364, 729230, 6366, 4860, 6367, 1230, 6360, 366, 1584, 920, 4851, 6358, 924, 925, 926, 6373, 9641, 6372, 6374, 5167, 6376, 5169, 8797, 6370, 1118, 2206, 1238, 2204, 1236, 1235, 1234, 29126, 1233, 6369, 933, 4986, 2209, 939, 4088, 6387, 3552, 1493, 221…	3590	358	16396	2.99798	1.82303e-67	1.82281e-67	1.68754e-67
GOTERM_CC_DIRECT	GO:0070062~extracellular exosome	933	24.9933	1.77837e-70	3880, 3881, 3882, 81607, 2548, 5817, 10417, 5819, 3872, 3875, 10411, 10410, 10894, 3892, 1473, 126961, 1471, 2317, 1, 2, 801, 4973, 3643, 3886, 3646, 2319, 4736, 808, 23705, 1000, 3417, 81876, 1476, 1475, 27068, 811, 814, 10875, 5836, 3418, 3672, 81618, 56681, 81617, 10404, 79784, 10406, 3426, 3425, 2335, 820, 821, 3664, 4513, 5604, 4758, 1009, 3683, 5861, 3684, 5862, 2108, 10857, 2346, 2588, 149…	3662	2756	17735	1.63951	2.006e-67	1.003e-67	9.19415e-68
GOTERM_BP_DIRECT	GO:0006954~inflammatory response	242	6.48272	2.67634e-70	6351, 8771, 6352, 6355, 4055, 6354, 6357, 6356, 29949, 51083, 355, 6348, 6347, 8767, 6349, 6362, 12, 8784, 6361, 6364, 729230, 6366, 4067, 6367, 4069, 1230, 6360, 246, 56300, 5027, 6358, 4973, 10663, 4615, 6915, 6373, 929, 6372, 6374, 114609, 7100, 8797, 6370, 79792, 2206, 1238, 1116, 135, 1236, 1234, 1233, 9759, 6369, 814, 3656, 730249, 939, 6387, 5970, 5971, 3552, 3551, 22861, 6382, 5293, 143, …	3590	378	16396	2.92393	2.2326e-66	1.11617e-66	1.03333e-66
GOTERM_CC_DIRECT	GO:0005576~extracellular region	593	15.8853	1.22694e-69	653509, 64399, 2550, 51083, 27087, 2668, 1215, 5818, 3512, 284217, 3630, 914, 4860, 1473, 126961, 1471, 729238, 1, 2, 252995, 2796, 56300, 4851, 4852, 801, 200081, 923, 4854, 925, 4856, 926, 10544, 808, 929, 2331, 2694, 2691, 2690, 1118, 1359, 2204, 2688, 1356, 2323, 2201, 2200, 170589, 811, 4864, 6804, 939, 3791, 5730, 5972, 2100, 3552, 2220, 1490, 5728, 10406, 3426, 3547, 1489, 2335, 820, 2695,…	3662	1494	17735	1.92228	1.38399e-66	4.61329e-67	4.22885e-67
GOTERM_MF_DIRECT	GO:0005515~protein binding	2294	61.4519	9.54974e-55	100506658, 91653, 8091, 1459, 3638, 5817, 2305, 10656, 1457, 5818, 5819, 10658, 2302, 56892, 284217, 1453, 3630, 5810, 3633, 3635, 1473, 126961, 1471, 139818, 2317, 2, 1468, 2312, 4973, 3643, 3646, 2319, 10666, 3661, 3662, 1000, 257062, 27065, 55585, 81876, 57761, 2322, 171558, 114971, 2321, 5832, 3654, 4986, 3655, 10631, 3656, 4988, 5836, 3659, 91662, 3672, 1493, 1490, 1489, 55110, 1488, 2335, 1…	3557	8742	16472	1.21519	2.3798e-51	2.38075e-51	2.26997e-51
GOTERM_CC_DIRECT	GO:0009897~external side of plasma membrane	137	3.66997	1.12973e-50	7442, 22914, 3123, 22871, 3084, 3916, 355, 2028, 356, 2266, 10495, 6504, 133396, 914, 916, 9619, 7057, 5034, 19, 1230, 361, 2833, 3126, 643, 920, 921, 5027, 5788, 6517, 4217, 925, 926, 1901, 10666, 928, 161198, 3383, 2206, 3815, 2205, 1236, 29126, 1234, 930, 1233, 931, 6403, 811, 6402, 3655, 10630, 1636, 2208, 939, 80381, 5175, 4240, 6387, 3672, 1493, 7070, 6382, 3949, 2214, 115650, 940, 1003, 94…	3662	193	17735	3.43776	1.27433e-47	3.18584e-48	2.92035e-48
GOTERM_BP_DIRECT	GO:0045087~innate immune response	221	5.92017	1.03391e-47	4179, 81603, 351, 6590, 10417, 3512, 7316, 8767, 912, 4600, 57506, 8542, 9755, 4067, 4068, 60489, 56300, 4852, 923, 4615, 929, 25, 114609, 7100, 27, 79671, 79792, 1113, 3654, 8685, 5971, 3551, 22861, 5293, 3426, 51311, 820, 3543, 3665, 22954, 6279, 3442, 29108, 3440, 338376, 1380, 114548, 55366, 3439, 1378, 51561, 710, 712, 5610, 100423062, 715, 716, 717, 6285, 9436, 6288, 200315, 2243, 2000, 345…	3590	403	16396	2.50456	8.62491e-44	2.87463e-44	2.66129e-44
GOTERM_CC_DIRECT	GO:0005829~cytosol	990	26.5202	2.1608e-46	81603, 9184, 1459, 1457, 1453, 3633, 6901, 3635, 10413, 139818, 2317, 2, 55330, 81844, 57510, 30011, 800, 801, 4975, 3646, 4736, 808, 22858, 3661, 4751, 3662, 79792, 3417, 55585, 3416, 57761, 57521, 2322, 57522, 81631, 811, 3654, 814, 815, 3656, 4747, 5836, 818, 3418, 3659, 3430, 22861, 2580, 22863, 1490, 81617, 57534, 79784, 5608, 5609, 3663, 5600, 3664, 5601, 3665, 5602, 27072, 5603, 3667, 5604…	3662	3295	17735	1.4551	2.43738e-43	4.87475e-44	4.46853e-44
GOTERM_CC_DIRECT	GO:0009986~cell surface	248	6.64345	8.9335e-42	64399, 4057, 4179, 22871, 350, 351, 5817, 5819, 355, 910, 3753, 6900, 912, 914, 3757, 5154, 5155, 4851, 10666, 10544, 5045, 5167, 6376, 5046, 8797, 2693, 2690, 250, 4072, 374, 3416, 2205, 29121, 1236, 1235, 1234, 259, 5159, 811, 3655, 3776, 6383, 7474, 3672, 81619, 59272, 6382, 9097, 81502, 1368, 940, 1003, 1244, 941, 942, 1803, 948, 3309, 949, 43, 5066, 7124, 3683, 3684, 3321, 3320, 2350, 8692, …	3662	533	17735	2.25339	1.0077e-38	1.6795e-39	1.53954e-39
GOTERM_BP_DIRECT	GO:0045944~positive regulation of transcription from RNA polymerase II promoter	389	10.4206	8.92516e-40	8091, 9063, 51083, 2305, 2668, 10538, 4609, 6907, 2302, 10891, 4842, 57506, 915, 10413, 54360, 4851, 4854, 4613, 4990, 3662, 6928, 6927, 2323, 3655, 135112, 3659, 6925, 5970, 5971, 3552, 3551, 10524, 1488, 940, 3663, 944, 3665, 10521, 4772, 5741, 2353, 1385, 1022, 114548, 3558, 1499, 10859, 3553, 6942, 958, 10974, 4780, 5991, 4782, 6720, 2000, 2120, 1030, 1390, 2119, 84911, 1029, 29110, 3569, 114…	3590	970	16396	1.83156	7.44537e-36	1.86112e-36	1.723e-36
GOTERM_BP_DIRECT	GO:0010628~positive regulation of gene expression	155	4.15216	7.63302e-39	6196, 7046, 4179, 8091, 7040, 7042, 4609, 3630, 6348, 998, 639, 4208, 916, 3091, 9475, 5155, 7291, 3371, 3249, 367, 5027, 5304, 4613, 1869, 409, 8431, 6770, 4593, 5562, 5564, 6774, 6532, 257101, 2053, 9241, 4193, 650, 3815, 1512, 811, 3934, 4088, 4485, 3398, 3552, 3397, 2064, 1490, 5293, 4915, 27074, 3949, 1401, 3304, 268, 2335, 2852, 3303, 940, 5324, 4478, 5600, 5601, 947, 5604, 10765, 7088, 914…	3590	262	16396	2.70193	6.36747e-35	1.27334e-35	1.17884e-35
GOTERM_BP_DIRECT	GO:0032496~response to lipopolysaccharide	114	3.05384	3.09394e-38	6198, 8771, 4055, 6590, 27242, 355, 2149, 356, 4049, 6622, 6868, 8784, 7056, 6401, 1594, 7293, 3929, 2796, 128, 5027, 4851, 1906, 923, 3764, 6373, 6372, 114609, 6374, 4353, 29, 8797, 2056, 1634, 133, 1236, 1511, 1991, 6403, 54658, 3654, 4988, 6648, 939, 7356, 9536, 5972, 1373, 10804, 943, 7867, 8718, 11213, 6279, 2353, 7082, 23643, 9261, 3717, 5731, 834, 5732, 836, 5734, 958, 54, 7099, 7132, 5196…	3590	164	16396	3.17471	2.58097e-34	4.3011e-35	3.9819e-35
GOTERM_CC_DIRECT	GO:0005887~integral component of plasma membrane	484	12.9654	1.15605e-36	909, 64399, 91653, 81607, 2550, 22871, 10899, 3759, 5817, 5818, 5819, 911, 6900, 912, 913, 914, 131096, 10894, 916, 917, 65010, 729230, 1230, 23731, 9076, 2798, 921, 4973, 3643, 923, 3645, 925, 10663, 926, 10666, 6915, 10544, 928, 23705, 5961, 2690, 2206, 1238, 2205, 55584, 29121, 2204, 1235, 2566, 1234, 1233, 2322, 930, 2321, 931, 10871, 4864, 3776, 4986, 10630, 4988, 4868, 2208, 939, 285220, 37…	3662	1401	17735	1.67309	1.30403e-33	1.79549e-34	1.64586e-34
GOTERM_CC_DIRECT	GO:0005886~plasma membrane	1116	29.8955	1.2734e-36	100506658, 3880, 91653, 81607, 2550, 22871, 5817, 1457, 5818, 5819, 1453, 57509, 92737, 6900, 3633, 10411, 131096, 10410, 10894, 3635, 1230, 22882, 2317, 55573, 2798, 30011, 800, 801, 4973, 4974, 3643, 10663, 2319, 10666, 6915, 808, 23705, 285335, 1000, 2571, 145270, 257062, 79792, 1238, 3416, 55584, 2568, 57526, 1236, 57761, 2566, 1235, 1234, 2322, 1233, 2321, 10871, 3654, 4986, 3655, 815, 3656,…	3662	3998	17735	1.35187	1.43639e-33	1.79549e-34	1.64586e-34
GOTERM_BP_DIRECT	GO:0051607~defense response to virus	111	2.97348	1.44049e-35	9582, 2150, 79132, 596, 10417, 84166, 4600, 57506, 10410, 10533, 10379, 5551, 81559, 83737, 81844, 60489, 201294, 5788, 3764, 56829, 925, 85363, 6773, 6772, 8678, 3661, 148022, 1755, 56832, 53840, 9636, 4986, 3659, 51428, 5970, 340061, 91543, 54541, 1525, 27350, 51311, 942, 3663, 4599, 3669, 3442, 29108, 3440, 338376, 114548, 8692, 3439, 3437, 51284, 10859, 51561, 3434, 3433, 115004, 5610, 5611, …	3590	164	16396	3.09117	1.20166e-31	1.71645e-32	1.58907e-32
GOTERM_MF_DIRECT	GO:0005102~receptor binding	182	4.87544	1.98341e-35	4295, 9463, 6357, 81607, 3484, 2150, 3084, 7042, 351, 4050, 2668, 5817, 5818, 1610, 2149, 5819, 356, 1730, 284217, 2147, 2266, 6347, 4049, 8767, 4843, 914, 8805, 6361, 4067, 5311, 19, 24145, 3133, 54360, 5270, 2281, 7294, 2, 640, 2039, 367, 3929, 5027, 4852, 409, 25, 23705, 6531, 27, 6376, 5443, 2053, 3417, 27065, 3416, 133, 650, 27344, 2048, 2323, 3135, 51024, 5159, 4345, 51268, 6404, 5319, 8038…	3557	353	16472	2.38759	4.94266e-32	2.47232e-32	2.35729e-32
GOTERM_BP_DIRECT	GO:0009615~response to virus	85	2.27699	3.87372e-34	6351, 50506, 9188, 6352, 6355, 7124, 6356, 1021, 8091, 8372, 8692, 79132, 2625, 3437, 3315, 1654, 10859, 1653, 3434, 3433, 8725, 5610, 4600, 10410, 4208, 10577, 7178, 59, 10581, 7852, 6367, 8061, 3451, 3373, 1191, 3925, 684, 29110, 4938, 10625, 4939, 1543, 1147, 3444, 602, 56829, 6714, 4615, 10346, 9201, 6375, 64135, 170506, 23586, 3460, 56832, 3459, 3458, 2962, 3456, 3455, 3454, 338, 30009, 4940…	3590	110	16396	3.52915	3.23146e-30	4.03883e-31	3.73911e-31
GOTERM_BP_DIRECT	GO:0042493~response to drug	162	4.33967	2.84404e-33	6198, 6750, 8412, 1063, 590, 7040, 7161, 7042, 51083, 595, 596, 4609, 476, 632, 10891, 4049, 6622, 999, 10257, 10014, 6868, 5395, 7057, 7298, 4067, 4860, 19, 1471, 5027, 768, 2837, 6915, 25, 6770, 26, 6531, 6652, 6772, 8678, 6774, 6532, 2571, 3383, 4193, 2170, 6928, 891, 29881, 135, 3939, 9759, 811, 54658, 4864, 6647, 3932, 6648, 32, 3934, 2180, 7077, 4363, 7356, 5970, 1373, 2185, 383, 4914, 5728…	3590	303	16396	2.44183	2.3725e-29	2.6358e-30	2.44019e-30
GOTERM_BP_DIRECT	GO:0070374~positive regulation of ERK1 and ERK2 cascade	110	2.94669	2.84271e-31	6351, 5781, 6352, 6355, 6354, 6357, 6356, 7040, 2150, 2149, 2266, 6348, 6347, 8767, 6504, 6349, 6362, 6361, 6364, 5154, 5155, 6366, 5156, 6367, 1230, 6360, 246, 6358, 408, 409, 7066, 6375, 25, 114609, 5320, 6376, 5322, 2056, 1880, 3383, 6370, 650, 57007, 1116, 84868, 652, 1236, 168667, 10519, 5159, 6369, 4988, 8829, 3791, 3156, 2066, 2185, 1490, 4914, 5728, 2852, 3146, 11331, 948, 5604, 50507, 71…	3590	174	16396	2.88727	2.37139e-27	2.3711e-28	2.19514e-28
GOTERM_BP_DIRECT	GO:0008284~positive regulation of cell proliferation	213	5.70587	6.07447e-31	3082, 22994, 3084, 2668, 2305, 596, 1457, 4609, 598, 356, 3630, 133396, 10413, 5154, 5155, 5156, 4067, 1471, 367, 29950, 4851, 6358, 1906, 3643, 6374, 2691, 4193, 4072, 374, 1910, 133, 26097, 2323, 2322, 2321, 10519, 9759, 5159, 811, 4869, 6386, 3791, 5970, 5058, 1490, 5728, 146, 1489, 2335, 1366, 820, 942, 8317, 3667, 51316, 1803, 5967, 8452, 3562, 2350, 1019, 1139, 80320, 3558, 1017, 7253, 6285…	3590	465	16396	2.09204	5.06732e-27	4.6061e-28	4.26428e-28
GOTERM_CC_DIRECT	GO:0016020~membrane	662	17.7337	4.36374e-30	9188, 2548, 10899, 5818, 10658, 2665, 4841, 3753, 3633, 10411, 10894, 10413, 3757, 917, 65010, 919, 5707, 5708, 1588, 5709, 2798, 201294, 920, 921, 4973, 200081, 3643, 5700, 923, 924, 3645, 10300, 3646, 2319, 4736, 928, 92521, 3662, 1000, 5718, 29121, 5719, 2323, 10519, 811, 4864, 5713, 4627, 4869, 818, 3672, 1493, 2580, 79784, 4519, 3426, 27074, 3547, 81502, 1124, 1003, 3543, 821, 5721, 4513, 10…	3662	2192	17735	1.46262	4.9223e-27	5.46922e-28	5.01345e-28
GOTERM_MF_DIRECT	GO:0001618~virus receptor activity	60	1.60729	5.54533e-29	6554, 4179, 6510, 3123, 81607, 222256, 8372, 1380, 8692, 5817, 5818, 5819, 3916, 950, 1378, 558, 10332, 6504, 3678, 3690, 4340, 3694, 7852, 3373, 9076, 7293, 26762, 2993, 920, 3685, 6317, 1948, 3688, 3921, 50848, 7301, 290, 3383, 3416, 1234, 4864, 6404, 4360, 339390, 9213, 7037, 4684, 8764, 59272, 1525, 3304, 3949, 3303, 941, 942, 30835, 1803, 1605, 949, 1604	3557	70	16472	3.96932	1.3819e-25	4.60817e-26	4.39375e-26
GOTERM_BP_DIRECT	GO:0043066~negative regulation of apoptotic process	204	5.46477	1.31262e-28	8771, 8535, 4057, 8091, 4170, 2668, 596, 4609, 597, 355, 598, 7316, 8767, 133396, 3875, 8784, 2796, 30812, 4615, 8678, 8554, 4193, 6491, 4072, 1910, 10519, 5159, 3654, 4869, 939, 5295, 7474, 5055, 3791, 4088, 5970, 3551, 57099, 5292, 5728, 10769, 1366, 7349, 51316, 3309, 7001, 3560, 7481, 5062, 7917, 3437, 3558, 3315, 3313, 952, 55367, 5610, 5611, 836, 959, 7494, 7010, 5076, 3574, 3572, 23017, 28…	3590	452	16396	2.06127	1.09499e-24	9.12379e-26	8.44669e-26
GOTERM_BP_DIRECT	GO:0007165~signal transduction	409	10.9563	3.57257e-28	8091, 2668, 1457, 5818, 5819, 2665, 2664, 1453, 3872, 3633, 10411, 57506, 3635, 10894, 54360, 2317, 2796, 55697, 920, 4975, 10666, 4615, 22858, 114609, 55584, 2568, 1235, 2323, 29126, 57522, 3654, 10871, 4864, 814, 10630, 2209, 1119, 27181, 4869, 91662, 2100, 1131, 5608, 3547, 5609, 1124, 2213, 1365, 2695, 943, 5600, 944, 945, 5602, 3667, 947, 5604, 706, 5606, 3683, 1385, 3320, 29108, 3561, 3560,…	3590	1152	16396	1.62149	2.98024e-24	2.29221e-25	2.12211e-25
GOTERM_BP_DIRECT	GO:0002576~platelet degranulation	73	1.95553	7.26279e-26	3082, 7123, 5340, 5341, 5265, 22915, 5267, 5345, 2153, 7040, 3481, 7042, 350, 197, 351, 3959, 3479, 2621, 710, 2266, 3674, 10257, 12, 7450, 5196, 7057, 3690, 5154, 5473, 5155, 4067, 2243, 1191, 1, 2, 2157, 2277, 6678, 801, 3920, 5627, 928, 808, 7422, 7424, 5004, 7423, 1675, 1950, 213, 335, 2244, 6403, 7018, 6647, 3699, 7076, 5175, 5054, 7277, 7078, 7114, 7273, 3827, 2335, 5005, 6414, 81, 6812, 57…	3590	102	16396	3.26863	6.05862e-22	4.32707e-23	4.00595e-23
GOTERM_BP_DIRECT	GO:0071222~cellular response to lipopolysaccharide	77	2.06268	4.17453e-25	58191, 22914, 23729, 7124, 29108, 114548, 10417, 79931, 10859, 10891, 558, 6347, 5976, 4843, 958, 10014, 4208, 7099, 7494, 6364, 7133, 19, 3297, 259230, 3569, 23097, 3929, 567, 5467, 7128, 6714, 6915, 929, 7189, 4790, 25, 7100, 6770, 1440, 3383, 148022, 1437, 1910, 3458, 84868, 1432, 1234, 3576, 5599, 10594, 4986, 730249, 5914, 3934, 4360, 5054, 7035, 7474, 11093, 5970, 1053, 3592, 1051, 3394, 38…	3590	113	16396	3.11212	3.48239e-21	2.32132e-22	2.14905e-22
GOTERM_CC_DIRECT	GO:0045121~membrane raft	110	2.94669	6.99825e-25	7046, 909, 23209, 5420, 5663, 351, 1613, 355, 55600, 3753, 4842, 3635, 6868, 7851, 4067, 6401, 19, 3098, 2040, 920, 4973, 5788, 1509, 6517, 1901, 10666, 929, 6531, 5045, 6532, 2693, 3383, 23426, 1910, 4864, 3932, 4988, 5175, 6386, 3791, 3672, 3551, 2185, 7070, 59272, 1525, 79026, 302, 6778, 1803, 948, 8837, 3945, 7124, 8692, 10855, 3717, 312, 6548, 10211, 836, 10333, 27040, 4923, 5979, 7132, 7010…	3662	206	17735	2.58606	7.89402e-22	7.89402e-23	7.23619e-23
GOTERM_MF_DIRECT	GO:0005125~cytokine activity	101	2.7056	1.40209e-24	6351, 7040, 29949, 3084, 7042, 4050, 2821, 356, 2662, 4049, 9235, 85480, 56300, 1906, 200081, 649, 50604, 7066, 54097, 374, 650, 56832, 652, 2323, 655, 9518, 8200, 7076, 50616, 7474, 3552, 9370, 1489, 3146, 944, 4254, 7124, 3442, 3562, 3440, 338376, 84639, 3439, 3558, 3557, 51561, 3553, 959, 8740, 131177, 8743, 8741, 8742, 3574, 3451, 26525, 3603, 3569, 3447, 3600, 3567, 27177, 3444, 3565, 27178,…	3557	176	16472	2.65749	3.494e-21	8.73852e-22	8.33191e-22
GOTERM_BP_DIRECT	GO:0070098~chemokine-mediated signaling pathway	57	1.52692	1.90618e-24	6351, 6352, 6355, 6354, 6357, 6356, 6348, 6347, 2829, 6349, 6362, 5196, 6361, 5197, 6364, 5473, 729230, 6366, 7852, 6367, 1230, 6360, 2833, 414062, 643, 2919, 6358, 10663, 10344, 6373, 6372, 6375, 6374, 6376, 9560, 6370, 57007, 1238, 2921, 2920, 3579, 1235, 1234, 3577, 1233, 3576, 6369, 4283, 7032, 6387, 6346, 2185, 1524, 10803, 2532, 10563, 3627	3590	71	16396	3.66657	1.59014e-20	9.93716e-22	9.19971e-22
GOTERM_BP_DIRECT	GO:0050900~leukocyte migration	80	2.14305	2.07318e-24	5781, 5420, 4893, 3683, 3684, 2150, 2621, 2302, 2147, 634, 5777, 3676, 914, 3678, 51206, 3635, 719, 7010, 3690, 7056, 6520, 4067, 6401, 481, 284, 285, 8140, 682, 2358, 960, 2357, 961, 965, 140885, 3685, 51378, 10461, 4973, 3687, 3688, 5624, 3689, 6714, 728, 3845, 5627, 10544, 50848, 9123, 6654, 1088, 3383, 6093, 54210, 972, 57126, 6403, 338, 5478, 6402, 51744, 857, 6404, 3655, 3932, 4627, 4282, 5…	3590	122	16396	2.99484	1.72944e-20	1.0172e-21	9.4171e-22
GOTERM_BP_DIRECT	GO:0007267~cell-cell signaling	129	3.45567	2.39851e-24	6351, 7200, 4295, 6352, 6355, 6750, 6354, 6357, 7042, 4050, 2701, 2028, 356, 3630, 6348, 4049, 2703, 6362, 6361, 6364, 5154, 6366, 4068, 6367, 24145, 1230, 7295, 3491, 6360, 79368, 122876, 367, 2796, 30011, 56300, 1906, 4856, 6373, 6372, 6375, 6374, 5443, 9402, 2691, 1081, 374, 133, 650, 135, 1234, 9518, 6369, 8829, 8200, 50616, 2100, 1490, 146, 1489, 268, 941, 942, 944, 945, 8838, 9547, 4012, 57…	3590	252	16396	2.33794	2.00084e-20	1.11144e-21	1.02896e-21
GOTERM_MF_DIRECT	GO:0004252~serine-type endopeptidase activity	106	2.83954	3.48106e-24	3082, 4057, 9622, 3002, 3001, 2153, 2152, 3240, 3083, 354, 1215, 2147, 4323, 5655, 5657, 255738, 5550, 1075, 43849, 2161, 2160, 10942, 54760, 3249, 28983, 2159, 2158, 203074, 2157, 3004, 3003, 1509, 649, 1508, 1506, 283471, 5045, 5046, 9361, 1514, 1513, 1512, 3816, 1511, 3817, 3818, 1991, 341277, 6768, 4485, 7113, 2220, 3426, 360200, 1520, 9407, 5327, 5328, 1803, 2219, 5340, 49, 712, 84000, 715, …	3557	191	16472	2.57001	8.67481e-21	1.73566e-21	1.6549e-21
GOTERM_BP_DIRECT	GO:0050731~positive regulation of peptidyl-tyrosine phosphorylation	62	1.66086	4.19503e-24	3082, 6794, 4254, 3562, 7040, 3481, 3084, 5062, 3717, 2623, 3479, 3630, 8767, 3678, 916, 10456, 3690, 5155, 3570, 284, 1942, 3569, 960, 10507, 3567, 920, 2475, 51378, 10188, 409, 1946, 6714, 54209, 25, 6850, 7422, 7424, 7423, 1440, 253260, 2252, 2690, 3383, 2205, 2688, 972, 975, 3976, 8829, 4282, 7157, 8764, 9370, 2185, 183, 3589, 23394, 941, 2255, 5008, 948, 5649	3590	82	16396	3.4532	3.4995e-20	1.84162e-21	1.70495e-21
GOTERM_BP_DIRECT	GO:0046718~viral entry into host cell	61	1.63407	4.77272e-24	6554, 4179, 6510, 81607, 222256, 1380, 8692, 5817, 5818, 5819, 3916, 950, 2621, 1378, 558, 10332, 6504, 3678, 3690, 4340, 3694, 9076, 7293, 83737, 26762, 2993, 3685, 6317, 1948, 1508, 3688, 3921, 50848, 8673, 7301, 290, 3383, 3416, 975, 4864, 6404, 4360, 339390, 9213, 7037, 4684, 8764, 59272, 1525, 27074, 3304, 3949, 3303, 941, 942, 30835, 1803, 1605, 57617, 949, 1604	3590	80	16396	3.48244	3.9814e-20	1.99046e-21	1.84275e-21
GOTERM_BP_DIRECT	GO:0001666~response to hypoxia	99	2.65202	9.0714e-24	7200, 5664, 2034, 2033, 7040, 7042, 472, 81575, 4323, 6347, 4049, 4204, 4842, 4843, 6868, 3091, 7057, 4582, 1909, 7852, 1471, 481, 2277, 768, 5562, 8678, 6532, 2056, 7184, 9361, 133, 650, 3939, 5313, 5315, 10631, 6648, 4088, 6387, 4089, 5058, 9370, 2185, 54541, 4519, 1365, 5327, 5328, 1803, 4878, 50507, 5066, 5465, 1385, 3163, 3162, 1139, 1137, 952, 4763, 317, 834, 5579, 836, 3952, 4524, 1813, 70…	3590	172	16396	2.62876	7.56736e-20	3.60307e-21	3.33568e-21
GOTERM_CC_DIRECT	GO:0031093~platelet alpha granule lumen	47	1.25904	1.95424e-23	3082, 5340, 5265, 7422, 22915, 7424, 5004, 5345, 7423, 2153, 7040, 3481, 7042, 197, 351, 1675, 213, 3479, 1950, 2621, 710, 2244, 2266, 12, 5196, 7450, 7076, 7057, 5054, 5473, 5154, 7114, 5155, 2243, 1191, 1, 2, 3827, 2335, 2157, 2277, 5005, 6678, 81, 5768, 5627, 87	3662	55	17735	4.13855	2.20438e-20	2.00398e-21	1.83698e-21
GOTERM_CC_DIRECT	GO:0005925~focal adhesion	167	4.47361	3.0247e-23	8650, 10095, 4179, 6235, 6191, 2273, 6193, 3482, 5817, 5819, 2665, 54751, 118, 4323, 998, 999, 10015, 6868, 6122, 5034, 6124, 6641, 25996, 3371, 8021, 7052, 2317, 30011, 11078, 9902, 6237, 5788, 10146, 2319, 10787, 4736, 8936, 10544, 928, 6132, 6136, 1000, 3383, 23545, 7184, 55740, 896, 79834, 2321, 5159, 811, 3655, 6129, 4988, 8829, 4869, 4627, 6141, 6386, 6143, 3672, 5058, 2185, 7070, 2580, 638…	3662	391	17735	2.06849	3.41186e-20	2.84321e-21	2.60628e-21
GOTERM_MF_DIRECT	GO:0008009~chemokine activity	44	1.17868	6.3531e-23	6351, 6373, 6372, 6375, 58191, 6352, 6374, 6355, 9547, 6354, 6376, 6357, 6356, 9560, 6370, 2921, 2920, 3576, 56477, 6348, 6347, 6369, 6349, 10850, 6362, 5196, 6361, 4283, 5197, 6364, 5473, 6366, 6387, 6346, 6367, 6360, 51192, 414062, 2919, 6358, 10563, 727, 10344, 3627	3557	49	16472	4.15833	1.58319e-19	2.63971e-20	2.51689e-20
GOTERM_BP_DIRECT	GO:0050729~positive regulation of inflammatory response	56	1.50013	2.54644e-22	6351, 6352, 6355, 6354, 6357, 6279, 6356, 8692, 3717, 3558, 51284, 51561, 6348, 6347, 6349, 5734, 7099, 6362, 7132, 7098, 729230, 6280, 6283, 7097, 6360, 7052, 3329, 414062, 3600, 961, 23097, 6358, 90865, 10344, 3606, 6375, 5320, 6376, 59067, 59341, 9560, 10318, 2167, 6369, 1956, 91662, 9575, 5054, 7474, 6346, 183, 185, 9173, 3949, 54106, 5603	3590	73	16396	3.50355	2.12424e-18	9.65448e-20	8.938e-20
GOTERM_BP_DIRECT	GO:0042127~regulation of cell proliferation	101	2.7056	3.9202e-22	7165, 8771, 4055, 3087, 10899, 2305, 27242, 3239, 355, 2146, 637, 4843, 3911, 7297, 8784, 5311, 7293, 3371, 7294, 640, 10428, 6373, 6372, 25, 27, 5321, 8554, 8797, 2175, 3815, 1874, 10519, 659, 3932, 939, 4241, 6662, 163126, 2185, 59272, 660, 301, 6932, 6778, 8718, 5328, 3702, 4097, 7124, 3716, 672, 7917, 3717, 673, 2984, 5732, 6303, 958, 10732, 3714, 7132, 5196, 5197, 5473, 7133, 23411, 3726, 37…	3590	184	16396	2.50696	3.27023e-18	1.36983e-19	1.26817e-19
GOTERM_BP_DIRECT	GO:0001525~angiogenesis	115	3.08063	3.94149e-22	4691, 7045, 2034, 7042, 2821, 2028, 81575, 79812, 634, 4323, 6347, 10411, 3911, 4846, 3091, 7453, 5154, 64321, 2041, 9990, 2833, 2277, 54922, 51378, 4856, 1901, 57007, 2048, 2321, 10519, 7855, 8828, 8829, 4627, 9378, 5175, 4240, 5054, 64344, 3791, 3397, 1890, 2185, 7070, 5290, 1490, 7075, 5728, 2335, 302, 6899, 641700, 7127, 5587, 3162, 27329, 60675, 2069, 6303, 5578, 3952, 3678, 3953, 7494, 7010…	3590	223	16396	2.35525	3.28799e-18	1.36983e-19	1.26817e-19
GOTERM_BP_DIRECT	GO:0045766~positive regulation of angiogenesis	74	1.98232	6.66456e-22	3082, 5587, 6356, 2152, 116844, 3162, 27329, 1536, 672, 2624, 1139, 1215, 3315, 3553, 5578, 5579, 10411, 2627, 718, 4846, 2626, 719, 7494, 7010, 7057, 3091, 4780, 7015, 8742, 7291, 3373, 23411, 2041, 285, 2833, 1545, 2277, 51378, 6237, 5228, 727, 3689, 2837, 728, 6915, 729, 7422, 6376, 7424, 133, 1116, 1512, 3579, 2247, 2246, 3576, 2321, 6369, 89832, 5054, 7474, 3791, 3552, 2022, 2185, 4914, 4838…	3590	115	16396	2.93885	5.55958e-18	2.22356e-19	2.05855e-19
GOTERM_MF_DIRECT	GO:0019899~enzyme binding	150	4.01822	6.72919e-22	9463, 8535, 590, 7040, 3482, 351, 6590, 2944, 595, 56259, 991, 6908, 3916, 1576, 10098, 10013, 5657, 1977, 3091, 5034, 4067, 5037, 2, 367, 488, 23054, 26047, 920, 4851, 5424, 7329, 4854, 3920, 80351, 409, 1080, 54808, 9761, 6256, 6772, 8554, 8313, 3141, 23028, 4193, 135, 83933, 3014, 5159, 54658, 38, 10361, 4486, 8841, 2100, 81619, 22861, 142, 5728, 143, 11338, 1644, 5609, 3304, 3303, 5447, 5329,…	3557	332	16472	2.09226	1.67691e-18	2.39655e-19	2.28504e-19
GOTERM_CC_DIRECT	GO:0072562~blood microparticle	72	1.92874	7.5368e-22	5340, 5345, 3043, 7040, 3240, 590, 197, 3959, 3512, 3039, 2147, 710, 2266, 3674, 84000, 100423062, 5216, 715, 716, 718, 12, 8542, 58, 6521, 2243, 83939, 2040, 1191, 1, 3848, 2, 720, 325, 721, 3048, 722, 6513, 60, 2638, 5627, 728378, 5004, 5444, 3263, 173, 1356, 213, 335, 731, 259, 336, 2244, 7018, 71, 6386, 7037, 2220, 3075, 183, 462, 3827, 3304, 2335, 3303, 3543, 348, 5005, 5644, 4478, 3700, 629…	3662	115	17735	3.03213	8.50151e-19	6.53962e-20	5.99465e-20
GOTERM_CC_DIRECT	GO:0005654~nucleoplasm	763	20.4393	8.22597e-22	9188, 64398, 8091, 81603, 9063, 9184, 51082, 1459, 2305, 10656, 1457, 6908, 10658, 4609, 6907, 201161, 1453, 10891, 4841, 5930, 5810, 10413, 5936, 126961, 22882, 1591, 5707, 51095, 55211, 5708, 5709, 57510, 4851, 3642, 801, 4973, 5700, 4854, 3646, 808, 114609, 3661, 3662, 79792, 29123, 6928, 3416, 5718, 6927, 5719, 26097, 83933, 57761, 55589, 57521, 10519, 5710, 5711, 814, 5713, 815, 57649, 5714,…	3662	2770	17735	1.33401	9.27889e-19	6.62778e-20	6.07546e-20
GOTERM_BP_DIRECT	GO:0008283~cell proliferation	161	4.31289	8.69923e-22	6232, 7045, 9101, 5422, 3087, 1063, 3084, 7042, 3638, 596, 4609, 2028, 598, 3479, 51366, 238, 10011, 6502, 5777, 6624, 10411, 3911, 10413, 7296, 7298, 8301, 1909, 1195, 115426, 7295, 3491, 55573, 367, 2277, 921, 79923, 4852, 200081, 7066, 6098, 6495, 4352, 7345, 5045, 6497, 4233, 6774, 8313, 2296, 3021, 3141, 4070, 23028, 6491, 374, 10630, 51428, 80381, 4089, 8566, 2067, 3552, 2066, 1131, 2064, 5…	3590	363	16396	2.02564	7.2569e-18	2.79078e-19	2.58367e-19
GOTERM_MF_DIRECT	GO:0008134~transcription factor binding	134	3.58961	1.04816e-21	6597, 6872, 6874, 2034, 64710, 2033, 8091, 3087, 1063, 7161, 9063, 196, 595, 596, 6908, 4609, 6907, 118, 10891, 4204, 10499, 10014, 10533, 3091, 64321, 7291, 3373, 81559, 79885, 10307, 367, 30812, 7329, 2959, 408, 1869, 7341, 8431, 7067, 8554, 3662, 8797, 6774, 219541, 2296, 23028, 1874, 2962, 1870, 9759, 55869, 5710, 5798, 5295, 4087, 4088, 5970, 340061, 8841, 7874, 3397, 22984, 5292, 142, 1487,…	3557	284	16472	2.18499	2.61201e-18	3.26633e-19	3.11435e-19
GOTERM_MF_DIRECT	GO:0042803~protein homodimerization activity	267	7.15242	1.9001e-21	6352, 4297, 8411, 81607, 3087, 81603, 22994, 4170, 471, 2668, 5817, 596, 5818, 597, 5819, 598, 3512, 118, 119, 8767, 4843, 914, 3757, 84680, 10533, 9619, 7450, 919, 5154, 5155, 729230, 5156, 22882, 487, 60489, 51652, 128, 920, 5027, 925, 10666, 8431, 6375, 23705, 114609, 26, 5167, 3661, 2690, 6928, 3417, 6927, 3416, 2323, 259, 2322, 6249, 3654, 6129, 3656, 5713, 815, 10993, 5836, 4627, 1119, 4869…	3557	729	16472	1.69608	4.73504e-18	5.26327e-19	5.01837e-19
GOTERM_BP_DIRECT	GO:0008285~negative regulation of cell proliferation	167	4.47361	3.29997e-21	6196, 4297, 6750, 6598, 3486, 590, 7040, 7161, 7042, 990, 2149, 51761, 5777, 6349, 4846, 8805, 11070, 7453, 4221, 4067, 5311, 10140, 5796, 1594, 5270, 3490, 80199, 367, 2796, 4851, 3642, 8935, 4335, 928, 6497, 8678, 6774, 8313, 2172, 2170, 162681, 133, 650, 56832, 135, 652, 655, 10519, 9759, 7855, 51548, 4988, 6648, 4869, 3659, 7077, 4087, 9536, 4089, 3672, 3552, 2066, 2185, 4914, 5728, 2852, 108…	3590	386	16396	1.97593	2.75283e-17	1.01945e-18	9.43791e-19
GOTERM_BP_DIRECT	GO:0060337~type I interferon signaling pathway	50	1.33941	4.44589e-21	3442, 3440, 3439, 3716, 3437, 3434, 3433, 4600, 10410, 10379, 7297, 10581, 3133, 3451, 6041, 684, 2634, 4938, 4939, 3447, 3444, 6773, 6772, 3661, 3662, 3456, 3455, 3135, 3454, 4940, 9636, 1958, 54739, 3659, 91543, 3430, 3394, 2537, 3107, 3106, 3105, 103, 3663, 8638, 3664, 4599, 3665, 3669, 8519, 3429	3590	63	16396	3.62471	3.70876e-17	1.3244e-18	1.22611e-18
GOTERM_BP_DIRECT	GO:0002250~adaptive immune response	83	2.22341	6.72339e-21	909, 22914, 7248, 4179, 3442, 338376, 3439, 27242, 3717, 3558, 3718, 57823, 27240, 3512, 151888, 10859, 910, 911, 8767, 5579, 10332, 913, 639, 27040, 170482, 64167, 4067, 4068, 2243, 3133, 3451, 7294, 3447, 3444, 920, 23495, 10462, 923, 924, 926, 608, 6890, 6850, 8631, 257101, 1880, 220972, 1514, 56832, 695, 1512, 3458, 84868, 3456, 973, 214, 974, 2244, 7535, 51744, 814, 11006, 8320, 1493, 2185, …	3590	141	16396	2.68845	5.60865e-17	1.93378e-18	1.79028e-18
GOTERM_BP_DIRECT	GO:0031295~T cell costimulation	55	1.47335	2.16287e-20	5063, 5781, 22914, 3123, 9020, 5062, 3119, 3117, 151888, 3115, 3113, 998, 5777, 915, 959, 916, 917, 3956, 919, 8740, 6366, 4067, 3126, 3125, 920, 2475, 921, 55615, 207, 1948, 1947, 6714, 9402, 253260, 29126, 80380, 10673, 857, 3932, 5879, 5295, 5133, 5058, 8764, 1493, 5290, 1326, 2534, 115650, 940, 29851, 941, 942, 79109, 1803	3590	75	16396	3.34923	1.80427e-16	6.01351e-18	5.56724e-18
GOTERM_BP_DIRECT	GO:0051092~positive regulation of NF-kappaB transcription factor activity	79	2.11626	2.9429e-20	22954, 5583, 7124, 4057, 6279, 5587, 29108, 7040, 81603, 114548, 1896, 55367, 3553, 238, 7316, 3630, 5610, 8767, 5579, 958, 959, 10454, 7099, 7098, 58484, 64127, 6280, 6283, 7097, 1191, 5590, 3569, 367, 1147, 8737, 11035, 847, 3689, 85363, 3965, 3845, 4615, 10346, 4591, 7189, 4790, 7188, 114609, 4791, 4792, 9447, 3383, 148022, 177, 695, 83696, 10519, 3654, 815, 3656, 5319, 4869, 9575, 7474, 7311,…	3590	133	16396	2.71281	2.45497e-16	7.9183e-18	7.33067e-18
GOTERM_BP_DIRECT	GO:0071346~cellular response to interferon-gamma	46	1.23225	6.20151e-20	6351, 6375, 6352, 6770, 6355, 6354, 6376, 6357, 6356, 10492, 9560, 6370, 1613, 199, 115362, 4609, 3113, 6348, 6347, 6369, 6349, 4843, 730249, 6362, 4360, 6361, 4261, 65010, 7098, 6364, 11093, 7474, 6366, 6346, 6367, 3594, 6360, 361, 414062, 2058, 2597, 965, 6358, 1906, 10344, 3965	3590	57	16396	3.68575	5.1733e-16	1.61646e-17	1.4965e-17
GOTERM_MF_DIRECT	GO:0042802~identical protein binding	267	7.15242	8.63717e-20	3082, 6351, 3081, 7442, 5265, 4297, 4055, 2670, 590, 81603, 350, 351, 3759, 4607, 596, 5819, 355, 598, 238, 3630, 6348, 4841, 8767, 6900, 3757, 84680, 11070, 7450, 919, 219931, 5155, 4069, 22882, 1471, 9076, 2317, 4615, 8315, 3661, 4193, 135, 5710, 10197, 5832, 4747, 6925, 8200, 34, 6386, 4088, 5970, 4089, 4882, 9099, 142, 5728, 2335, 1366, 940, 1365, 5721, 6812, 27072, 1803, 22954, 6275, 6396, 7…	3557	747	16472	1.65521	2.15238e-16	2.15325e-17	2.05305e-17
GOTERM_BP_DIRECT	GO:0006935~chemotaxis	74	1.98232	9.46168e-20	58191, 6352, 6036, 6355, 9547, 6354, 6357, 6356, 60675, 6348, 6347, 2829, 10850, 719, 6362, 6361, 6364, 5594, 729230, 5355, 7852, 6367, 1230, 8061, 3491, 6360, 2833, 2358, 2357, 643, 3565, 2919, 727, 10663, 728, 10344, 3965, 1901, 6373, 6372, 6374, 5880, 6376, 6370, 57007, 1238, 2920, 1236, 3579, 2247, 1235, 1432, 1234, 3577, 1673, 1233, 3576, 1672, 56477, 3730, 6369, 4283, 6387, 6346, 11251, 189…	3590	122	16396	2.77023	7.89293e-16	2.39151e-17	2.21403e-17
GOTERM_BP_DIRECT	GO:0045893~positive regulation of transcription, DNA-templated	202	5.4112	1.35028e-19	4297, 6597, 8091, 9063, 2305, 6908, 4609, 6907, 10891, 4842, 133396, 3091, 5155, 8301, 23291, 367, 23054, 51773, 4851, 30812, 3643, 4613, 6495, 8554, 3662, 6928, 6927, 9759, 30009, 3654, 814, 3659, 4869, 6925, 8320, 7474, 4087, 4088, 5970, 4089, 2100, 3551, 10524, 941, 942, 3664, 3665, 5604, 5727, 5606, 7124, 4772, 2353, 1385, 1022, 3440, 7481, 55366, 1017, 57541, 1499, 952, 3553, 5979, 55809, 50…	3590	514	16396	1.79486	1.1264e-15	3.29814e-17	3.05338e-17
GOTERM_BP_DIRECT	GO:0071356~cellular response to tumor necrosis factor	69	1.84838	1.38395e-19	6351, 7442, 6352, 6355, 6354, 6357, 6356, 29108, 8372, 8692, 2625, 672, 27242, 796, 3037, 10891, 6348, 6347, 6625, 6349, 2629, 6362, 6361, 7057, 6364, 4780, 6366, 6367, 7412, 3373, 23411, 259230, 6360, 3569, 414062, 1147, 965, 8737, 6358, 1906, 10068, 6517, 4217, 10344, 6375, 6376, 3065, 3383, 9560, 6370, 1116, 3576, 10519, 2167, 9759, 338, 10594, 6369, 730249, 10631, 3934, 11093, 5970, 6346, 355…	3590	110	16396	2.86484	1.15449e-15	3.29814e-17	3.05338e-17
GOTERM_BP_DIRECT	GO:0060333~interferon-gamma-mediated signaling pathway	51	1.36619	3.5148e-19	5580, 3123, 81603, 3716, 3119, 3717, 3117, 3115, 3113, 10379, 4261, 7412, 3133, 3055, 2634, 4938, 960, 2633, 4939, 3126, 3125, 567, 85363, 10346, 6772, 3661, 3662, 3460, 3383, 10437, 3459, 3458, 53840, 3135, 4940, 815, 2209, 818, 3659, 5371, 4684, 3394, 3107, 3106, 3105, 3663, 8638, 3664, 3665, 6737, 7706	3590	69	16396	3.37571	2.93205e-15	8.14361e-17	7.53926e-17
GOTERM_CC_DIRECT	GO:0031012~extracellular matrix	128	3.42888	1.43716e-18	6230, 7045, 4054, 22915, 7047, 6191, 2152, 6193, 7040, 350, 7042, 6590, 197, 1215, 284217, 79812, 4323, 5657, 3911, 7450, 7057, 5155, 5034, 3371, 5270, 3491, 7052, 3490, 1191, 2317, 84034, 1509, 4218, 4856, 11117, 7980, 6135, 5046, 6136, 2331, 161198, 3381, 7184, 1634, 1511, 498, 655, 2201, 1475, 2200, 811, 5315, 6647, 10631, 4627, 7077, 4240, 5054, 7078, 4000, 10085, 2335, 302, 821, 117159, 1805…	3662	296	17735	2.09426	1.62112e-15	1.08075e-16	9.90686e-17
GOTERM_BP_DIRECT	GO:0018108~peptidyl-tyrosine phosphorylation	84	2.2502	1.47587e-18	5580, 8576, 11064, 3563, 3562, 3320, 3084, 3717, 3718, 2069, 238, 558, 5610, 5777, 8767, 4920, 1859, 5979, 157285, 8805, 7010, 5155, 5156, 4067, 3055, 1195, 2042, 2041, 3568, 3567, 10461, 3643, 5987, 3645, 6714, 5747, 25, 4593, 7301, 27, 7465, 4233, 2254, 2252, 1437, 1436, 3815, 695, 2249, 1950, 2247, 2048, 2246, 2322, 79834, 2321, 5159, 613, 7535, 1956, 285220, 7750, 3791, 4486, 2066, 3594, 2263…	3590	153	16396	2.50744	1.23117e-14	3.3271e-16	3.08019e-16
GOTERM_BP_DIRECT	GO:0007166~cell surface receptor signaling pathway	124	3.32173	1.83056e-18	9466, 7442, 5540, 6750, 284217, 2147, 23284, 3597, 6865, 6347, 914, 6869, 8807, 915, 916, 10379, 917, 919, 1230, 2041, 4061, 2833, 920, 5027, 1906, 5788, 925, 4615, 928, 929, 114609, 4352, 4233, 5961, 8797, 4070, 6370, 1910, 29121, 29126, 1234, 930, 939, 8685, 8567, 6302, 2064, 2185, 1489, 301, 84059, 940, 7867, 3820, 8718, 3821, 948, 4879, 81061, 3824, 3440, 23643, 23765, 23523, 154, 3559, 10219…	3590	270	16396	2.0975	1.52706e-14	4.01809e-16	3.7199e-16
GOTERM_BP_DIRECT	GO:0007568~aging	88	2.35735	2.45183e-18	6198, 9104, 2353, 1385, 3484, 7040, 597, 796, 710, 51761, 10891, 317, 6347, 6622, 1738, 4261, 5076, 7298, 4780, 7133, 5079, 6720, 7412, 1075, 23410, 3727, 1788, 1028, 3569, 1543, 3600, 1268, 2796, 1267, 842, 328, 207, 6558, 847, 3689, 3725, 2290, 9365, 4791, 6531, 4353, 22937, 4035, 6774, 2056, 1281, 9361, 1910, 133, 1634, 2247, 578, 218, 3654, 6647, 2729, 7077, 7076, 5970, 3992, 3156, 183, 1490,…	3590	165	16396	2.4358	2.04532e-14	5.24378e-16	4.85463e-16
GOTERM_BP_DIRECT	GO:0043065~positive regulation of apoptotic process	133	3.56282	2.70733e-18	6196, 7442, 5663, 4332, 5664, 3486, 3001, 8091, 7040, 3482, 7161, 51083, 6194, 472, 1613, 10018, 56259, 10537, 597, 355, 598, 356, 7316, 4049, 6622, 5414, 8767, 637, 3635, 10533, 22926, 7052, 1191, 4851, 4217, 4616, 7189, 25, 6654, 29, 133, 650, 652, 3939, 655, 23263, 5159, 1917, 6647, 3655, 2066, 1493, 9131, 5608, 3827, 2852, 3146, 3663, 668, 943, 8439, 6655, 6659, 706, 1647, 50507, 7124, 9148, …	3590	299	16396	2.03153	2.25845e-14	5.64545e-16	5.22649e-16
GOTERM_BP_DIRECT	GO:0050776~regulation of immune response	71	1.90196	3.71305e-18	909, 22914, 3683, 5817, 5819, 57823, 10859, 910, 911, 912, 3676, 958, 915, 959, 916, 718, 917, 919, 6441, 9436, 9437, 4068, 7412, 3133, 259197, 3803, 3805, 567, 3565, 604, 3688, 925, 3689, 926, 10666, 54209, 3802, 3383, 1281, 54210, 29121, 930, 3135, 975, 4345, 6402, 51348, 10871, 11126, 2209, 3812, 3659, 80381, 4088, 100507436, 1525, 3903, 3107, 3106, 27036, 3105, 2214, 2213, 10288, 945, 3665, 3…	3590	120	16396	2.70222	3.09742e-14	7.55379e-16	6.99321e-16
GOTERM_MF_DIRECT	GO:0019901~protein kinase binding	155	4.15216	4.00887e-18	8013, 8651, 5422, 7161, 6194, 10899, 2305, 595, 476, 598, 54875, 998, 10131, 5777, 133396, 3996, 57506, 916, 11190, 3091, 219931, 5310, 5796, 5037, 25998, 2041, 9990, 920, 801, 5788, 4217, 925, 1869, 85363, 4218, 197259, 10666, 7187, 808, 7189, 6497, 5564, 6774, 8313, 253260, 23542, 2690, 148022, 891, 4905, 894, 56155, 57761, 896, 57521, 10519, 9759, 5159, 7855, 1917, 1915, 4624, 3932, 4869, 9892…	3557	375	16472	1.91409	9.99011e-15	9.08556e-16	8.66281e-16
GOTERM_BP_DIRECT	GO:0045471~response to ethanol	65	1.74123	4.50814e-18	7200, 6198, 4255, 6279, 5741, 7082, 6191, 2625, 551, 595, 3558, 4609, 3359, 632, 6347, 3952, 2904, 1978, 2902, 7298, 7412, 1392, 3371, 6916, 761, 1268, 841, 2796, 3565, 6678, 847, 6517, 4736, 6915, 929, 6770, 6531, 6774, 1440, 391104, 3383, 410, 578, 339, 6647, 2806, 4986, 5914, 939, 3596, 3156, 9370, 2185, 4914, 5728, 4519, 2534, 983, 57817, 8836, 867, 6138, 1728, 10400, 2539	3590	105	16396	2.82727	3.76069e-14	8.95296e-16	8.28854e-16
GOTERM_BP_DIRECT	GO:0030335~positive regulation of cell migration	94	2.51808	6.58402e-18	3082, 22954, 7046, 8650, 58191, 6352, 5420, 6354, 6356, 2152, 7040, 2150, 3480, 6591, 7481, 27329, 1613, 199, 3717, 2149, 3479, 3037, 3630, 6348, 4323, 5578, 4920, 3678, 6868, 5979, 7494, 7057, 5154, 5594, 5155, 131578, 5156, 4067, 1230, 2041, 3491, 10505, 10507, 2159, 324, 51176, 3685, 4851, 3642, 1906, 6317, 3643, 208, 10344, 5747, 1901, 9564, 7422, 1081, 650, 1436, 3815, 1435, 1512, 652, 3611,…	3590	184	16396	2.33321	5.49239e-14	1.27715e-15	1.18237e-15
GOTERM_BP_DIRECT	GO:0000165~MAPK cascade	119	3.18778	2.6098e-17	9861, 6352, 7040, 3084, 2668, 4609, 3630, 7316, 6348, 6347, 133396, 5536, 9978, 4208, 5154, 5155, 5156, 4221, 4342, 5037, 5707, 5708, 5709, 801, 5700, 4217, 808, 9365, 8831, 8315, 6654, 23542, 5718, 3815, 5719, 1234, 5159, 5710, 10197, 5711, 815, 5713, 5714, 4747, 818, 6300, 5058, 2066, 2064, 2185, 5608, 5688, 5721, 5600, 7867, 3667, 5603, 5604, 5606, 5063, 8452, 4254, 7124, 4893, 3563, 3562, 356…	3590	262	16396	2.07438	2.17709e-13	4.94735e-15	4.58019e-15
GOTERM_MF_DIRECT	GO:0004713~protein tyrosine kinase activity	74	1.98232	3.2495e-17	11064, 3563, 3562, 3320, 3084, 3480, 3716, 3717, 3718, 2069, 238, 558, 1859, 5979, 8805, 7297, 7010, 4067, 4145, 3055, 7294, 640, 3568, 3567, 10461, 3643, 10188, 6714, 5747, 6098, 25, 4593, 7301, 6850, 27, 7465, 4233, 2254, 2252, 1437, 3815, 695, 2249, 1950, 2247, 2048, 2246, 2321, 5159, 613, 7535, 3932, 1956, 285220, 7750, 3791, 4486, 4882, 2066, 2263, 2185, 2064, 2260, 7075, 7273, 660, 5608, 56…	3557	133	16472	2.57657	8.09775e-14	6.75083e-15	6.43671e-15
GOTERM_BP_DIRECT	GO:0060326~cell chemotaxis	47	1.25904	4.23226e-17	3082, 5580, 9564, 6372, 6352, 6374, 6355, 9547, 6376, 6357, 9560, 6291, 6370, 3815, 2920, 1235, 56477, 6348, 5159, 6347, 10850, 719, 4283, 6364, 6289, 6366, 5155, 5156, 6387, 9732, 7412, 2022, 6360, 185, 2358, 2357, 51176, 566, 2919, 51411, 6358, 727, 1969, 728, 409, 4856, 3627	3590	65	16396	3.30239	3.53055e-13	7.84473e-15	7.26256e-15
GOTERM_BP_DIRECT	GO:0000187~activation of MAPK activity	64	1.71444	9.15394e-17	3082, 5063, 5781, 7124, 7161, 151, 3084, 9261, 1139, 3479, 60675, 3553, 238, 7316, 8767, 10454, 7099, 7057, 5594, 5595, 6288, 4342, 7852, 64127, 1942, 2357, 120892, 5027, 3643, 408, 727, 728, 7189, 5562, 2690, 650, 3815, 1950, 2247, 972, 1432, 2246, 975, 89832, 3654, 6647, 3656, 5319, 7474, 8567, 7311, 3672, 7039, 5608, 983, 2255, 8517, 5600, 128239, 7867, 5602, 5604, 284340, 5606	3590	107	16396	2.73174	9.26148e-13	1.65985e-14	1.53667e-14
GOTERM_BP_DIRECT	GO:0030593~neutrophil chemotaxis	47	1.25904	1.09364e-16	6351, 6375, 6352, 3680, 6850, 6355, 6354, 6376, 6357, 6279, 6356, 9560, 7042, 6370, 54210, 2921, 3958, 3458, 3579, 3576, 3553, 6348, 6347, 6369, 6349, 5319, 6362, 6361, 6364, 5473, 6288, 6346, 3672, 6367, 6280, 6283, 6360, 5293, 51192, 1525, 414062, 1441, 6358, 1906, 3689, 728, 10344	3590	66	16396	3.25235	9.26148e-13	1.94087e-14	1.79683e-14
GOTERM_BP_DIRECT	GO:0071347~cellular response to interleukin-1	49	1.31262	1.61107e-16	6351, 9100, 6352, 6355, 6354, 6357, 6356, 29108, 8372, 8692, 4609, 3037, 6348, 6347, 6349, 5976, 6362, 6361, 3091, 6364, 6366, 6367, 3373, 6360, 3569, 414062, 6358, 1906, 10344, 7528, 3605, 4790, 6375, 6376, 3383, 9560, 6370, 1116, 3576, 2244, 6369, 730249, 3934, 7035, 6662, 5970, 6346, 1051, 820	3590	71	16396	3.15196	9.26148e-13	2.79957e-14	2.59181e-14
GOTERM_BP_DIRECT	GO:0001934~positive regulation of protein phosphorylation	71	1.90196	3.38988e-16	7124, 7040, 3481, 199, 595, 2621, 55600, 2147, 1453, 3553, 10211, 6789, 958, 57506, 6868, 718, 7494, 7010, 3690, 9475, 5595, 23411, 1392, 3491, 10507, 120892, 2475, 8737, 55615, 207, 3643, 208, 408, 1946, 5747, 3845, 7066, 25, 4593, 7422, 8313, 57161, 1910, 650, 1436, 652, 894, 896, 2323, 10519, 5879, 1956, 89780, 3791, 6662, 5058, 8841, 2066, 9370, 2022, 2064, 22863, 4914, 4915, 2852, 302, 820, …	3590	127	16396	2.55328	2.77844e-12	5.77041e-14	5.34217e-14
GOTERM_BP_DIRECT	GO:0014068~positive regulation of phosphatidylinositol 3-kinase signaling	46	1.23225	3.51244e-16	3082, 6352, 5364, 8678, 1440, 2150, 7042, 3084, 1634, 3815, 3717, 2688, 2149, 3479, 2147, 2322, 2321, 6403, 5159, 3630, 5777, 3952, 10456, 7010, 5154, 3791, 5155, 6662, 5156, 2066, 23411, 183, 2260, 284, 4915, 2534, 10507, 2852, 940, 5467, 867, 55615, 847, 5747, 5649, 3606	3590	65	16396	3.23212	2.77844e-12	5.85945e-14	5.42461e-14
GOTERM_CC_DIRECT	GO:0048471~perinuclear region of cytoplasm	214	5.73265	4.65744e-16	4172, 5141, 351, 231, 356, 1453, 6347, 4842, 4843, 3875, 3757, 11190, 729230, 4067, 8301, 11076, 19, 1471, 487, 488, 54922, 51655, 2319, 8673, 4074, 25, 5169, 1116, 1113, 10519, 811, 932, 4864, 5298, 153443, 9536, 5730, 81618, 1493, 2580, 9099, 1490, 10524, 27074, 3304, 3303, 947, 4878, 43, 5727, 6275, 5066, 10293, 4771, 7248, 8576, 1022, 3320, 8692, 5062, 1019, 1499, 81892, 10297, 5610, 10178, 3…	3662	620	17735	1.67161	5.00933e-13	3.28349e-14	3.00987e-14
GOTERM_BP_DIRECT	GO:0010629~negative regulation of gene expression	74	1.98232	4.66679e-16	5460, 6872, 7124, 4179, 1385, 3440, 7040, 7042, 199, 310, 6348, 998, 4843, 2629, 916, 4208, 5155, 7015, 7498, 7014, 8301, 9314, 1230, 23411, 1392, 5071, 166, 29110, 54567, 84875, 207, 54602, 4613, 7528, 3965, 2319, 6098, 8431, 4790, 5241, 7423, 2099, 3065, 8195, 891, 6608, 3458, 84868, 578, 3696, 32, 1636, 4282, 4087, 6586, 25819, 3398, 2022, 5091, 183, 23435, 1490, 79621, 2534, 3949, 2852, 940, …	3590	136	16396	2.48506	3.70459e-12	7.63249e-14	7.06607e-14
GOTERM_CC_DIRECT	GO:0005764~lysosome	100	2.67881	1.1407e-15	23209, 2670, 8372, 2548, 3916, 911, 6622, 3753, 255738, 9476, 219931, 7852, 1075, 1471, 3373, 55850, 259307, 201294, 1509, 56829, 5547, 1508, 3920, 9001, 4077, 4353, 7226, 27346, 1118, 1514, 1513, 1512, 410, 411, 412, 57521, 414, 4864, 6647, 54414, 55745, 1636, 8722, 5972, 81618, 10404, 3949, 1522, 27113, 1520, 8836, 947, 4758, 6036, 8692, 10855, 154, 51284, 950, 115123, 3553, 7879, 51449, 54, 10…	3662	224	17735	2.16205	1.25233e-12	7.56889e-14	6.93815e-14
GOTERM_BP_DIRECT	GO:0000122~negative regulation of transcription from RNA polymerase II promoter	249	6.67024	1.74907e-15	7442, 6597, 8535, 8091, 3087, 6591, 595, 2305, 4609, 6907, 2302, 356, 7316, 50674, 126961, 22882, 145258, 4851, 3642, 1906, 7329, 4854, 8431, 6493, 6495, 6256, 10194, 6497, 8554, 23028, 4193, 6928, 1910, 6927, 83933, 57761, 9759, 811, 57649, 51547, 6925, 11171, 8320, 4087, 7356, 4088, 5970, 4089, 5971, 2100, 163126, 9099, 142, 10524, 1488, 1487, 3665, 6932, 948, 83482, 5727, 6936, 3429, 8452, 712…	3590	720	16396	1.57947	1.48184e-11	2.80558e-13	2.59738e-13
GOTERM_MF_DIRECT	GO:0004872~receptor activity	100	2.67881	1.8459e-15	8771, 22914, 4179, 6510, 81607, 22871, 3482, 2150, 5817, 355, 8809, 6504, 912, 914, 8807, 10894, 7056, 2833, 55697, 920, 921, 4851, 924, 4854, 10666, 10544, 3802, 23705, 7100, 26, 8797, 3383, 2051, 4070, 54413, 1235, 4345, 4864, 55504, 8828, 4360, 9378, 1131, 3547, 3949, 51311, 942, 945, 8718, 5329, 201633, 10219, 51284, 950, 799, 10332, 958, 51206, 10333, 5979, 7099, 7010, 7098, 3690, 3694, 2591…	3557	217	16472	2.13404	4.70335e-12	3.53988e-13	3.37517e-13
GOTERM_BP_DIRECT	GO:0048661~positive regulation of smooth muscle cell proliferation	43	1.15189	2.05005e-15	8013, 7189, 6352, 6198, 7124, 6772, 5345, 3162, 231, 199, 4609, 652, 2247, 3479, 2069, 1991, 10891, 9759, 6502, 5159, 3654, 10257, 1956, 7057, 5155, 3398, 3596, 3156, 2263, 3570, 7052, 3569, 51135, 2475, 207, 56729, 5743, 1906, 4854, 4615, 3606, 1901, 3725	3590	60	16396	3.27311	1.66707e-11	3.22632e-13	2.98689e-13
GOTERM_BP_DIRECT	GO:0046777~protein autophosphorylation	85	2.27699	2.91089e-15	6790, 6793, 5582, 6792, 6872, 6794, 8576, 5587, 1020, 23049, 3480, 9261, 5062, 472, 1613, 3717, 127933, 238, 5610, 8569, 6789, 1859, 8408, 8805, 2081, 150094, 7010, 22848, 5156, 4067, 4342, 3055, 1195, 2041, 7294, 2872, 120892, 2475, 8737, 207, 3643, 11035, 3645, 6714, 5747, 25, 4593, 7301, 6850, 4751, 2011, 1436, 3815, 2322, 79834, 2321, 5159, 613, 3654, 10155, 814, 815, 1956, 818, 3791, 5058, 2…	3590	171	16396	2.27021	2.40798e-11	4.49625e-13	4.16258e-13
GOTERM_BP_DIRECT	GO:0031663~lipopolysaccharide-mediated signaling pathway	29	0.776855	4.28296e-15	929, 5581, 6352, 4792, 7124, 3661, 7040, 23643, 148022, 1432, 3553, 6348, 6347, 3654, 8767, 3656, 4846, 7099, 5594, 5595, 4067, 3055, 7097, 3929, 207, 923, 4615, 3606, 949	3590	32	16396	4.13896	3.61198e-11	6.49531e-13	6.01328e-13
GOTERM_BP_DIRECT	GO:0007596~blood coagulation	89	2.38414	4.98925e-15	4097, 5340, 5265, 22915, 3442, 2153, 3440, 3043, 2152, 23764, 2151, 2150, 2625, 3439, 2624, 3717, 2623, 2149, 2147, 10938, 953, 2266, 998, 5657, 51206, 2627, 2626, 7450, 3690, 7056, 8546, 4067, 5873, 2243, 126961, 3451, 161882, 5270, 64805, 139818, 3172, 2160, 3447, 2159, 2158, 3048, 2157, 3444, 5027, 5104, 966, 5624, 4778, 5868, 5627, 10544, 8352, 9002, 7980, 80856, 3066, 3021, 3065, 8350, 8351,…	3590	184	16396	2.2091	4.16767e-11	7.43131e-13	6.87982e-13
GOTERM_BP_DIRECT	GO:0002548~monocyte chemotaxis	34	0.910796	7.94958e-15	6351, 6375, 6352, 6355, 6354, 6376, 6357, 6356, 2350, 9560, 6370, 3958, 796, 2321, 6348, 6347, 6369, 6349, 6362, 6361, 6364, 6223, 6366, 5155, 6346, 6367, 3570, 6283, 6360, 3569, 414062, 301, 6358, 10344	3590	42	16396	3.6972	6.66827e-11	1.16329e-12	1.07696e-12
GOTERM_MF_DIRECT	GO:0002020~protease binding	58	1.55371	1.23103e-14	8530, 5265, 49, 7124, 5345, 29108, 2152, 596, 675, 3554, 7316, 3630, 10211, 836, 7450, 7494, 3690, 1473, 24145, 1471, 2, 3685, 5104, 7128, 6317, 3688, 6318, 2319, 6717, 6531, 5045, 4155, 4035, 8797, 3815, 970, 10956, 1476, 1475, 1991, 6402, 11047, 3934, 7077, 7076, 5054, 7078, 7157, 7273, 462, 3949, 2335, 940, 302, 624, 1803, 8837, 8915	3557	100	16472	2.6859	3.07101e-11	2.19212e-12	2.09012e-12
GOTERM_BP_DIRECT	GO:0043123~positive regulation of I-kappaB kinase/NF-kappaB signaling	80	2.14305	2.13505e-14	22954, 5581, 6275, 4055, 7124, 4057, 5587, 81603, 3162, 2150, 9020, 10537, 2149, 1499, 356, 7316, 834, 57708, 8767, 5579, 5536, 958, 57506, 10333, 3956, 6285, 7132, 8743, 6366, 64127, 124583, 5071, 6283, 7052, 684, 29110, 1147, 841, 51135, 8737, 7329, 54602, 56829, 10342, 85363, 3965, 4615, 10346, 9641, 7189, 7188, 25, 114609, 3661, 57161, 148022, 57162, 79594, 330, 1236, 57449, 3654, 55504, 2363…	3590	161	16396	2.26938	1.7782e-10	3.07043e-12	2.84256e-12
GOTERM_BP_DIRECT	GO:0006915~apoptotic process	199	5.33083	3.67366e-14	4297, 8655, 4055, 9984, 30818, 29949, 1459, 54474, 596, 1457, 355, 56892, 356, 4049, 8767, 914, 3635, 84681, 1471, 30011, 51652, 4615, 10787, 4616, 929, 23705, 6495, 8678, 3661, 5047, 8797, 1116, 135, 10519, 10197, 3659, 51428, 5058, 3552, 57099, 22861, 5292, 5728, 5608, 5609, 944, 706, 10293, 6279, 29108, 3440, 114548, 55240, 5062, 3559, 55367, 3553, 2908, 834, 836, 839, 6280, 23017, 1029, 79444…	3590	556	16396	1.63464	3.06555e-10	5.19356e-12	4.80814e-12
GOTERM_BP_DIRECT	GO:0006959~humoral immune response	40	1.07152	6.82677e-14	7124, 4057, 1880, 3442, 338376, 3440, 2625, 3439, 29760, 54210, 27242, 56832, 2821, 596, 3458, 1235, 2302, 3456, 931, 6347, 4049, 4208, 5452, 5133, 5079, 4068, 3574, 3451, 6480, 7030, 684, 3569, 3447, 940, 3444, 326, 9308, 4851, 7942, 54209	3590	57	16396	3.205	5.69581e-10	9.49034e-12	8.78605e-12
GOTERM_MF_DIRECT	GO:0008201~heparin binding	78	2.08947	7.78654e-14	7123, 6355, 6354, 6159, 4057, 26279, 350, 27329, 351, 6347, 10178, 5196, 7057, 5197, 5792, 6288, 200879, 283, 5270, 3491, 2160, 400668, 566, 84870, 5104, 4018, 5228, 4856, 6373, 51816, 6372, 26, 7422, 4353, 5046, 5322, 7423, 2331, 2254, 2252, 177, 2249, 652, 1511, 2247, 2246, 655, 2200, 1991, 6403, 338, 6402, 3730, 10631, 64094, 8828, 8829, 4043, 6586, 3990, 2263, 3075, 1490, 2260, 462, 3827, 233…	3557	160	16472	2.25755	1.93944e-10	1.29412e-11	1.23391e-11
GOTERM_MF_DIRECT	GO:0001948~glycoprotein binding	43	1.15189	9.38639e-14	5265, 3684, 3320, 2670, 7040, 3482, 350, 3416, 10956, 26232, 1453, 6403, 811, 999, 6900, 3932, 1956, 6804, 3956, 7450, 7431, 7057, 6386, 9695, 7037, 5476, 7039, 59272, 6382, 80331, 563, 2534, 3949, 27113, 567, 120892, 920, 821, 5304, 5327, 5921, 3689, 3309	3557	65	16472	3.0635	2.33784e-10	1.46252e-11	1.39447e-11
GOTERM_MF_DIRECT	GO:0044212~transcription regulatory region DNA binding	95	2.54487	1.17132e-13	5460, 4297, 6872, 7124, 8535, 7520, 7080, 2353, 1385, 3087, 7161, 4092, 196, 7481, 2625, 672, 6908, 6907, 1499, 6942, 6622, 9219, 10014, 10413, 4802, 2627, 4208, 2626, 3170, 4261, 7494, 55809, 5076, 4780, 5991, 64321, 4221, 22807, 9314, 3097, 3172, 84911, 2119, 3727, 64919, 367, 51176, 3169, 326, 5468, 6877, 408, 7528, 3725, 4790, 7067, 6495, 7023, 6256, 5245, 6774, 170506, 2296, 3065, 23028, 702…	3557	213	16472	2.06541	2.91884e-10	1.71771e-11	1.63778e-11
GOTERM_BP_DIRECT	GO:0042102~positive regulation of T cell proliferation	41	1.09831	1.24245e-13	3280, 7189, 6352, 4179, 59067, 6708, 199, 3458, 84868, 3718, 29126, 51561, 3115, 3553, 3113, 80380, 912, 10673, 3952, 959, 916, 80381, 7037, 4860, 7412, 3572, 3592, 54440, 3569, 115650, 3600, 301, 940, 56244, 3565, 920, 966, 923, 5788, 10288, 1947	3590	60	16396	3.12087	1.03636e-09	1.69889e-11	1.57282e-11
GOTERM_BP_DIRECT	GO:0051384~response to glucocorticoid	43	1.15189	1.54584e-13	5020, 5066, 6198, 7124, 5069, 2690, 590, 23205, 374, 133, 199, 596, 355, 3557, 632, 336, 799, 218, 836, 2629, 2805, 6285, 50616, 7298, 7356, 6346, 5730, 9370, 6382, 3329, 1843, 1369, 3569, 189, 84676, 3586, 3146, 6678, 6898, 7349, 5743, 306, 3845	3590	65	16396	3.02133	1.2892e-09	2.07965e-11	1.92532e-11
GOTERM_BP_DIRECT	GO:0050830~defense response to Gram-positive bacterium	51	1.36619	1.6801e-13	9466, 22914, 7124, 6037, 2197, 351, 796, 29102, 4049, 8767, 6868, 54, 4069, 3133, 3570, 283, 7097, 1668, 29110, 3569, 3929, 567, 57115, 5027, 4852, 728, 4615, 1669, 8993, 114609, 4153, 5320, 79792, 133, 84868, 1113, 1673, 1672, 8349, 5319, 7432, 6863, 8764, 2220, 3592, 1401, 3105, 820, 944, 1969, 948	3590	85	16396	2.74028	1.40126e-09	2.2244e-11	2.05932e-11
GOTERM_MF_DIRECT	GO:0004672~protein kinase activity	138	3.69676	2.44768e-13	6196, 7046, 6198, 6352, 6355, 23049, 6195, 1613, 1459, 595, 1457, 1453, 6348, 6347, 1859, 7297, 5156, 1195, 2041, 7294, 51135, 4217, 197259, 30811, 9641, 25, 22858, 5166, 5562, 27, 7465, 5563, 4233, 5289, 5564, 4751, 2051, 6093, 2966, 56155, 57761, 55589, 3654, 814, 815, 285220, 6300, 6662, 4882, 5058, 3551, 2064, 2580, 5608, 5609, 10922, 4919, 545, 5600, 8558, 5601, 4117, 8317, 7867, 5602, 5603,…	3557	357	16472	1.79008	6.10052e-10	3.39004e-11	3.2323e-11
GOTERM_BP_DIRECT	GO:0045429~positive regulation of nitric oxide biosynthetic process	33	0.884008	2.95648e-13	7442, 7100, 22914, 7124, 2099, 3320, 3043, 3383, 148022, 199, 3717, 3458, 3553, 3630, 6648, 4988, 1956, 7099, 4088, 5311, 9314, 2185, 64902, 183, 1191, 186, 3569, 2475, 207, 5743, 1906, 3643, 3689	3590	43	16396	3.50501	2.46633e-09	3.85312e-11	3.56718e-11
GOTERM_CC_DIRECT	GO:0005737~cytoplasm	1247	33.4048	3.18584e-13	23729, 2550, 259266, 81603, 10899, 2305, 54474, 5817, 6908, 1215, 10658, 56892, 54478, 253959, 3872, 3633, 3875, 10413, 22882, 2317, 55573, 55330, 81844, 57510, 30011, 801, 3646, 4736, 808, 3661, 4751, 3662, 1000, 27065, 3417, 6927, 3416, 1234, 1476, 57521, 1475, 57522, 27068, 811, 3652, 3654, 5832, 814, 10631, 3656, 4747, 5836, 3659, 91662, 22863, 10404, 57534, 5608, 5609, 1487, 3663, 3664, 3665…	3662	5171	17735	1.1679	3.59419e-10	1.99646e-11	1.83009e-11
GOTERM_BP_DIRECT	GO:0043410~positive regulation of MAPK cascade	49	1.31262	3.47491e-13	5581, 8771, 3486, 3481, 154, 355, 2149, 3479, 1499, 3630, 8844, 3952, 5154, 7133, 5155, 114897, 3570, 7293, 3569, 367, 3643, 85363, 2254, 1000, 57161, 650, 3815, 55024, 2322, 2321, 858, 3976, 939, 7077, 50937, 3791, 8764, 2263, 2260, 4915, 3589, 2852, 3146, 2255, 8558, 6657, 5008, 6899, 8718	3590	81	16396	2.76283	2.89884e-09	4.45911e-11	4.12819e-11
GOTERM_BP_DIRECT	GO:0006953~acute-phase response	31	0.830431	3.71035e-13	4153, 5265, 5068, 5004, 5345, 6774, 2056, 3240, 6291, 197, 3557, 2147, 3630, 54658, 12, 50616, 9332, 6289, 6288, 3077, 1051, 3570, 3569, 1401, 2335, 3929, 325, 2157, 5005, 57817, 3700	3590	39	16396	3.63028	3.09519e-09	4.68909e-11	4.3411e-11
GOTERM_MF_DIRECT	GO:0008083~growth factor activity	77	2.06268	3.9837e-13	3082, 4254, 3562, 7040, 3481, 7042, 3084, 27329, 2668, 2821, 3558, 3479, 2147, 2069, 2662, 3952, 3714, 4803, 346389, 6320, 5154, 5473, 5155, 3574, 3569, 3567, 3565, 2277, 2919, 649, 5228, 4856, 7066, 51816, 9048, 7422, 7424, 7423, 1440, 2254, 2252, 1437, 8909, 374, 650, 1435, 2249, 2688, 652, 1950, 2247, 3578, 2246, 655, 9518, 3976, 8200, 7076, 9573, 6387, 7039, 1890, 182, 3592, 183, 1490, 4838, …	3557	161	16472	2.21476	9.92683e-10	5.22703e-11	4.98382e-11
GOTERM_BP_DIRECT	GO:0006508~proteolysis	161	4.31289	5.51792e-13	3082, 9861, 9986, 4057, 4179, 9622, 2153, 431705, 3083, 354, 79258, 10537, 6907, 2147, 1179, 4323, 5655, 5657, 1738, 6868, 9476, 5550, 64167, 1075, 43849, 2160, 10942, 3249, 28983, 2158, 203074, 2157, 3004, 3003, 4973, 5304, 1509, 649, 5547, 1508, 1506, 283471, 9520, 64174, 10072, 1360, 1514, 1359, 3416, 1513, 1512, 3816, 1511, 3817, 3818, 1991, 341277, 55748, 6768, 7979, 5714, 3933, 10875, 8722,…	3590	435	16396	1.69036	4.60296e-09	6.8694e-11	6.35961e-11
GOTERM_BP_DIRECT	GO:0007204~positive regulation of cytosolic calcium ion concentration	68	1.82159	6.48084e-13	5020, 2150, 551, 2624, 3717, 552, 3558, 2149, 796, 60675, 2740, 952, 799, 5731, 5732, 2829, 5733, 5734, 719, 5030, 729230, 6288, 5156, 5310, 1909, 7852, 1230, 114897, 121665, 2833, 2358, 2357, 1906, 2837, 728, 6915, 25, 27, 2099, 59341, 1910, 133, 55584, 773, 1236, 3579, 1235, 1234, 1233, 56477, 51024, 859, 4988, 6863, 2782, 2185, 183, 185, 3827, 146, 2852, 10803, 3146, 623, 624, 10563, 948, 1604	3590	134	16396	2.31765	5.40593e-09	7.94951e-11	7.35956e-11
GOTERM_BP_DIRECT	GO:0007155~cell adhesion	167	4.47361	6.84956e-13	6351, 7045, 5420, 22915, 91653, 6356, 81607, 22871, 431705, 351, 4607, 10417, 5818, 5819, 284217, 632, 634, 6347, 6504, 6900, 53942, 914, 10894, 6868, 9993, 9235, 7450, 7057, 5792, 4340, 6401, 10020, 5796, 1230, 2042, 3371, 481, 3491, 3490, 2833, 10428, 488, 1861, 26047, 920, 84034, 140885, 60484, 4973, 8778, 4974, 3921, 2319, 1901, 11117, 10666, 928, 50848, 94025, 27, 6376, 5961, 1000, 3383, 338…	3590	457	16396	1.66895	5.71433e-09	8.28003e-11	7.66555e-11
GOTERM_BP_DIRECT	GO:0043524~negative regulation of neuron apoptotic process	67	1.7948	9.61834e-13	8013, 5582, 5663, 7161, 3162, 2668, 2821, 3717, 673, 596, 2149, 598, 10891, 8846, 558, 6347, 6622, 4204, 2902, 4208, 4803, 7015, 5071, 23017, 284, 3329, 728, 3845, 3725, 6495, 6770, 7301, 8831, 5641, 4035, 7423, 3065, 6093, 332, 773, 135, 3611, 6647, 2729, 6648, 8829, 4747, 8200, 2185, 2020, 1051, 5290, 581, 4914, 4915, 80331, 2534, 2730, 1201, 23394, 79625, 348, 6812, 5921, 4436, 627, 10763	3590	132	16396	2.31816	8.02322e-09	1.14609e-10	1.06104e-10
GOTERM_BP_DIRECT	GO:0007623~circadian rhythm	46	1.23225	1.02128e-12	6097, 6532, 1385, 2033, 3363, 1019, 355, 60675, 10891, 4543, 4544, 4841, 56938, 4843, 3952, 1859, 4547, 56339, 1956, 9575, 5054, 7298, 25819, 8864, 6720, 4783, 8841, 9611, 3397, 9370, 181, 7150, 220202, 4914, 3727, 4915, 2932, 1644, 1960, 687, 406, 1628, 50865, 8914, 1406, 3725	3590	75	16396	2.80117	8.51964e-09	1.19979e-10	1.11075e-10
GOTERM_BP_DIRECT	GO:0033209~tumor necrosis factor-mediated signaling pathway	62	1.66086	1.06768e-12	9861, 8771, 4055, 7124, 29108, 9020, 4050, 27242, 3717, 355, 1896, 356, 7316, 5698, 4049, 3875, 958, 959, 6868, 7132, 8740, 8784, 7133, 8741, 8742, 7293, 3604, 5707, 5708, 5709, 51330, 23495, 8737, 5700, 608, 7187, 9447, 6772, 8797, 330, 5718, 970, 5719, 5710, 10197, 10673, 5711, 55504, 5713, 5714, 3856, 939, 7311, 8764, 3551, 2185, 115650, 943, 5688, 5721, 9966, 8718	3590	118	16396	2.39968	8.90677e-09	1.23688e-10	1.14509e-10
GOTERM_BP_DIRECT	GO:0032760~positive regulation of tumor necrosis factor production	34	0.910796	1.87446e-12	929, 114609, 29108, 3066, 3065, 23643, 148022, 3717, 10417, 3458, 51561, 6348, 6347, 8767, 3952, 914, 57506, 7099, 5196, 5295, 7098, 3133, 64127, 7291, 7097, 1191, 54440, 3929, 3146, 8737, 4776, 54106, 948, 4615	3590	47	16396	3.30388	1.56371e-08	2.14177e-10	1.98282e-10
GOTERM_CC_DIRECT	GO:0043234~protein complex	146	3.91106	3.20864e-12	9100, 5781, 6597, 64398, 5663, 4057, 5664, 6598, 991, 354, 4609, 476, 126206, 2664, 238, 10013, 8767, 4842, 9219, 5536, 10014, 4208, 1978, 11190, 6641, 5156, 4221, 24145, 7290, 1191, 367, 488, 2035, 4615, 1080, 8431, 7189, 6497, 9129, 8678, 4751, 23542, 3021, 23028, 4193, 10998, 6927, 10238, 2322, 2168, 930, 51024, 9759, 6647, 6767, 4627, 9378, 5331, 6662, 5058, 3398, 1373, 6382, 142, 4914, 1525,…	3662	412	17735	1.7162	3.61936e-09	1.90492e-10	1.74617e-10
GOTERM_MF_DIRECT	GO:0005524~ATP binding	425	11.3849	3.27791e-12	9188, 23729, 1459, 1457, 127933, 1453, 51095, 1105, 3643, 5700, 3764, 3645, 341567, 22858, 4751, 79671, 10998, 55585, 3416, 4629, 57761, 55589, 2322, 2321, 3654, 5832, 814, 4624, 3656, 815, 4625, 5836, 1119, 4627, 818, 91662, 285220, 3791, 4882, 81618, 1373, 3551, 22861, 2580, 79784, 5608, 5609, 10769, 3304, 3303, 1244, 5600, 5601, 5602, 10521, 5603, 5604, 3309, 3308, 5606, 1022, 3320, 1021, 1020…	3557	1468	16472	1.34068	8.16861e-09	4.08592e-10	3.8958e-10
GOTERM_BP_DIRECT	GO:0006968~cellular defense response	40	1.07152	4.0127e-12	8678, 4332, 23643, 8808, 10219, 3959, 135, 3579, 1235, 1234, 2543, 930, 3135, 10871, 10312, 11126, 10578, 3812, 4283, 729230, 9436, 5551, 5970, 9437, 4068, 8061, 2185, 1524, 3805, 3929, 10803, 3565, 8712, 10288, 3688, 728, 3822, 3702, 8915, 5408	3590	62	16396	2.94654	3.34738e-08	4.51641e-10	4.18124e-10
GOTERM_BP_DIRECT	GO:0048010~vascular endothelial growth factor receptor signaling pathway	44	1.17868	4.06324e-12	9564, 7422, 7424, 5587, 7423, 3320, 2296, 6093, 9261, 5062, 1536, 3315, 1432, 1398, 2321, 998, 558, 6347, 71, 659, 8828, 5879, 8829, 7494, 5295, 3690, 9475, 3791, 6300, 10163, 2185, 5290, 387, 2534, 2277, 3685, 5600, 60, 5228, 7867, 5603, 5747, 6714, 10787	3590	72	16396	2.79102	3.38952e-08	4.51641e-10	4.18124e-10
GOTERM_BP_DIRECT	GO:0009636~response to toxic substance	49	1.31262	4.11518e-12	6351, 6198, 6352, 4255, 1066, 2353, 196, 1019, 596, 355, 26471, 2984, 6348, 5610, 999, 10013, 1813, 7298, 5594, 5595, 4067, 1471, 7097, 1788, 1545, 1147, 1267, 4155, 6532, 5444, 2053, 2052, 4193, 23063, 5159, 4747, 6529, 1119, 7274, 11093, 1373, 9131, 581, 6382, 10249, 4519, 983, 5888, 1728	3590	85	16396	2.63282	3.43286e-08	4.51641e-10	4.18124e-10
GOTERM_BP_DIRECT	GO:0016032~viral process	116	3.10742	4.36969e-12	8655, 4055, 6872, 3880, 6874, 5422, 10492, 2033, 7161, 1974, 6908, 1058, 912, 3875, 9978, 1977, 919, 729230, 5156, 4067, 79080, 8021, 55690, 55697, 7329, 6877, 4217, 2959, 10787, 2956, 7341, 6774, 3263, 79671, 4193, 57007, 259, 2960, 3014, 55746, 3932, 4869, 5295, 4240, 3791, 10482, 7874, 79023, 10524, 1524, 387, 2213, 10241, 5688, 8837, 10005, 8453, 8732, 129401, 1385, 3561, 3560, 5062, 4928, 56…	3590	290	16396	1.82685	3.64523e-08	4.73345e-10	4.38218e-10
GOTERM_BP_DIRECT	GO:0042060~wound healing	47	1.25904	4.80745e-12	7046, 3680, 5465, 6279, 9241, 1281, 7042, 3084, 1634, 57822, 2247, 2004, 2069, 4763, 5159, 3630, 836, 3853, 4988, 1956, 7076, 7032, 6364, 3690, 5175, 5154, 7474, 5055, 4088, 5156, 5058, 5894, 7039, 2022, 2064, 3371, 6382, 3569, 171389, 2335, 246, 2255, 2475, 6678, 5467, 4217, 949	3590	80	16396	2.68319	4.01041e-08	5.14089e-10	4.75938e-10
GOTERM_MF_DIRECT	GO:0016301~kinase activity	99	2.65202	5.66964e-12	6196, 6198, 6872, 6195, 1457, 238, 6502, 6348, 8767, 8941, 10020, 9479, 7294, 2710, 30011, 51135, 801, 197258, 808, 5286, 5166, 7465, 5563, 5289, 23542, 57761, 2323, 5313, 3654, 5315, 815, 3932, 1119, 5295, 11171, 5298, 2064, 2580, 5290, 5293, 4915, 545, 5567, 8558, 5601, 4117, 8317, 5328, 5329, 56848, 9146, 6792, 6794, 8851, 5587, 1022, 1020, 9020, 5062, 3717, 673, 1017, 5578, 10454, 5979, 5591,…	3557	238	16472	1.92629	1.41289e-08	6.73067e-10	6.41749e-10
GOTERM_BP_DIRECT	GO:0008217~regulation of blood pressure	41	1.09831	5.90074e-12	6296, 4012, 5443, 28514, 2053, 3043, 3162, 1910, 476, 774, 796, 2642, 1113, 5973, 6446, 6647, 3952, 4624, 6648, 4846, 1636, 4041, 59, 64167, 6863, 4882, 1909, 5972, 183, 680, 186, 1584, 5742, 5468, 51752, 5743, 1906, 4852, 947, 4878, 4879	3590	65	16396	2.88081	4.92238e-08	6.23014e-10	5.76779e-10
GOTERM_BP_DIRECT	GO:0019221~cytokine-mediated signaling pathway	65	1.74123	7.91873e-12	8651, 50506, 3442, 3562, 338376, 3440, 2152, 3560, 9021, 84639, 23765, 3439, 3717, 1896, 2069, 3597, 3553, 6347, 133396, 7132, 5196, 729230, 131578, 7850, 163702, 5355, 1230, 3055, 3572, 3451, 3570, 7052, 3569, 3601, 3447, 3567, 27177, 51135, 1101, 56300, 3444, 27178, 3845, 4615, 6376, 6775, 6774, 1440, 2690, 1436, 1634, 3815, 56832, 2322, 5798, 5970, 3552, 3594, 1050, 2811, 3588, 3587, 1441, 366…	3590	131	16396	2.26613	6.60584e-08	8.25627e-10	7.64355e-10
GOTERM_BP_DIRECT	GO:0019083~viral transcription	58	1.55371	8.35541e-12	6230, 6155, 6232, 6231, 6234, 129401, 6159, 6235, 2197, 6191, 6193, 6192, 6194, 4928, 51121, 6227, 6229, 6228, 6122, 6124, 6167, 6203, 6202, 25873, 8021, 3921, 4736, 5903, 6132, 6135, 6137, 6136, 6171, 6173, 6204, 55746, 6129, 6209, 6208, 23636, 6141, 6144, 6188, 6187, 6143, 6223, 7311, 6189, 6222, 6224, 23511, 8480, 79023, 79902, 6139, 6138, 6218, 6217	3590	111	16396	2.38643	6.9701e-08	8.60401e-10	7.96549e-10
GOTERM_MF_DIRECT	GO:0004714~transmembrane receptor protein tyrosine kinase activity	29	0.776855	9.76384e-12	6098, 4593, 7301, 4233, 3480, 1436, 3815, 2322, 2321, 238, 558, 4920, 5979, 1956, 7010, 3791, 5156, 2066, 2263, 2064, 7075, 4914, 4915, 4919, 10461, 3643, 5987, 1969, 3645	3557	38	16472	3.53408	2.43315e-08	1.10642e-09	1.05494e-09
GOTERM_BP_DIRECT	GO:0045071~negative regulation of viral genome replication	30	0.803643	1.16469e-11	6352, 7124, 4057, 282617, 6590, 10318, 3456, 3434, 5610, 4940, 9636, 57506, 10410, 10581, 91543, 200315, 200316, 6041, 4938, 684, 27350, 60489, 103, 84875, 6732, 4599, 8638, 56829, 3669, 8519	3590	40	16396	3.42535	9.71585e-08	1.18472e-09	1.0968e-09
GOTERM_BP_DIRECT	GO:0050728~negative regulation of inflammatory response	46	1.23225	1.27956e-11	3082, 5580, 8993, 4790, 7301, 4210, 5465, 29, 2693, 9021, 114548, 79671, 2625, 3559, 1139, 3558, 135, 4907, 335, 1991, 613, 89832, 5734, 730249, 2629, 54, 80381, 91662, 7132, 7010, 7133, 4088, 6288, 9314, 9370, 3848, 100, 1269, 2852, 348, 5467, 4598, 7128, 5624, 4856, 284340	3590	79	16396	2.65934	1.0674e-07	1.28588e-09	1.19045e-09
GOTERM_BP_DIRECT	GO:0030168~platelet activation	59	1.5805	1.43672e-11	5580, 5581, 5582, 5781, 5583, 2153, 2151, 151, 2149, 2621, 2147, 2266, 558, 5578, 5777, 5579, 958, 51206, 27040, 959, 7450, 5196, 5197, 3690, 5594, 5595, 6288, 4067, 2243, 3569, 57113, 2157, 207, 10461, 408, 409, 6714, 928, 9002, 5880, 7301, 6850, 1281, 2244, 10630, 3932, 5879, 5295, 11093, 160851, 5894, 2782, 5290, 2811, 387, 2534, 2815, 2814, 87	3590	115	16396	2.34314	1.19851e-07	1.42663e-09	1.32076e-09
GOTERM_BP_DIRECT	GO:0070301~cellular response to hydrogen peroxide	37	0.99116	2.27208e-11	5580, 25, 5562, 7226, 2395, 3066, 4193, 231, 2146, 2168, 558, 10013, 5536, 8807, 3934, 5076, 6188, 4780, 5111, 5970, 9314, 3297, 1471, 23411, 9131, 383, 1545, 3569, 983, 301, 57332, 328, 7128, 10068, 6778, 4217, 10105	3590	57	16396	2.96463	1.89536e-07	2.22957e-09	2.06411e-09
GOTERM_BP_DIRECT	GO:0006919~activation of cysteine-type endopeptidase activity involved in apoptotic process	47	1.25904	2.78781e-11	7124, 5366, 6279, 8797, 29108, 29843, 2152, 114548, 79594, 10018, 3717, 1512, 355, 2149, 356, 55367, 7415, 834, 6622, 317, 637, 836, 3932, 5979, 56616, 4803, 91662, 5371, 22900, 8743, 4088, 7498, 58484, 22861, 9131, 6280, 9451, 581, 3329, 1029, 1027, 27113, 841, 5468, 8737, 9966, 3429	3590	83	16396	2.58621	2.32559e-07	2.70385e-09	2.50319e-09
GOTERM_CC_DIRECT	GO:0022627~cytosolic small ribosomal subunit	31	0.830431	3.16911e-11	6230, 6232, 6231, 6234, 6235, 2197, 6191, 6193, 6192, 6194, 55168, 1654, 3039, 6227, 6204, 6229, 6228, 6209, 6208, 6188, 6187, 6223, 6222, 6189, 6203, 6224, 6202, 83939, 6218, 6217, 3921	3662	45	17735	3.33628	3.57476e-08	1.78738e-09	1.63843e-09
GOTERM_MF_DIRECT	GO:0046982~protein heterodimerization activity	161	4.31289	4.26416e-11	3082, 7165, 6872, 6874, 5422, 2034, 7040, 4170, 7042, 196, 56655, 596, 5818, 597, 5819, 598, 1058, 253959, 118, 119, 638, 915, 4208, 916, 9619, 917, 3091, 5154, 5155, 5034, 64321, 22926, 22807, 24145, 126961, 22882, 7291, 440093, 4851, 30812, 10300, 10388, 2319, 6519, 6493, 114609, 6256, 10592, 6654, 2571, 3021, 6928, 6927, 650, 3014, 54658, 3654, 2729, 3656, 4747, 4869, 6925, 6804, 5295, 6386, 4…	3557	462	16472	1.61379	1.06263e-07	4.62198e-09	4.40692e-09
GOTERM_BP_DIRECT	GO:0006468~protein phosphorylation	160	4.2861	6.80679e-11	7046, 9463, 6198, 6355, 6872, 6356, 3486, 3364, 7040, 6195, 7042, 351, 472, 1613, 1459, 595, 1457, 1453, 6347, 1859, 8408, 7297, 9475, 5155, 4067, 7294, 5027, 4217, 197259, 30811, 9641, 6098, 22858, 5166, 5562, 5563, 5289, 5564, 4751, 2051, 6093, 2966, 650, 1511, 56155, 57761, 55589, 3654, 814, 815, 3656, 3932, 5295, 4087, 4882, 5058, 3551, 2064, 2185, 2580, 5290, 5292, 5293, 4914, 660, 10769, 10…	3590	455	16396	1.60602	5.67822e-07	6.52591e-09	6.04161e-09
GOTERM_BP_DIRECT	GO:0006614~SRP-dependent cotranslational protein targeting to membrane	50	1.33941	7.30225e-11	6230, 6155, 6232, 6231, 6234, 6159, 6235, 2197, 6191, 6193, 6192, 6194, 51121, 6227, 6229, 6228, 6747, 6122, 6124, 6167, 6203, 6202, 25873, 3921, 4736, 6132, 6135, 6137, 6136, 6171, 6173, 6204, 6129, 6209, 6208, 6141, 6144, 6188, 6187, 6143, 6223, 7311, 6189, 6222, 6224, 6139, 6138, 6218, 6217, 6734	3590	93	16396	2.45545	6.09153e-07	6.92137e-09	6.40772e-09
GOTERM_BP_DIRECT	GO:0045740~positive regulation of DNA replication	30	0.803643	8.03141e-11	4254, 2056, 3562, 3480, 1437, 374, 3479, 2069, 80169, 998, 811, 3630, 5879, 5319, 1956, 4869, 5154, 5155, 5111, 5156, 10361, 1471, 3569, 466, 983, 2255, 7349, 3643, 3725, 2736	3590	42	16396	3.26224	6.6998e-07	7.52697e-09	6.96838e-09
GOTERM_BP_DIRECT	GO:0001938~positive regulation of endothelial cell proliferation	41	1.09831	8.32495e-11	7046, 7422, 7424, 5587, 6356, 7423, 253260, 3164, 2152, 116844, 650, 652, 2247, 57521, 4763, 5578, 6347, 6369, 659, 858, 8828, 8829, 7010, 3091, 3690, 7474, 3791, 5155, 6387, 8742, 23411, 283, 383, 1960, 2277, 2475, 207, 6776, 5228, 10344, 3725	3590	69	16396	2.7138	6.94467e-07	7.71538e-09	7.14281e-09
GOTERM_BP_DIRECT	GO:0018105~peptidyl-serine phosphorylation	61	1.63407	8.86902e-11	5580, 6196, 5581, 7046, 5582, 5583, 6872, 8851, 5587, 1020, 23049, 9261, 5062, 472, 596, 1017, 127933, 2621, 1453, 5578, 5579, 8569, 6789, 1859, 8408, 5591, 5594, 5155, 5595, 5310, 1195, 5590, 29110, 2872, 120892, 2475, 207, 208, 8658, 6714, 9201, 6850, 2056, 253260, 3611, 1432, 5599, 6446, 814, 815, 6300, 9451, 2932, 10769, 983, 1641, 545, 5566, 7867, 8317, 5603	3590	125	16396	2.22876	7.39853e-07	8.12928e-09	7.526e-09
GOTERM_BP_DIRECT	GO:0030198~extracellular matrix organization	84	2.2502	8.9881e-11	7045, 3680, 7124, 3682, 3683, 5268, 3684, 2670, 351, 10855, 284217, 1299, 2266, 4763, 3674, 999, 3676, 3678, 3679, 3911, 7450, 7373, 7057, 3690, 5154, 5155, 3694, 4146, 7412, 2243, 3371, 3491, 682, 960, 961, 6678, 602, 3685, 3687, 3688, 4811, 3689, 5747, 11117, 50848, 6692, 4791, 6696, 5045, 342371, 1284, 391104, 3383, 1281, 3381, 1634, 2006, 2247, 2201, 2200, 2244, 3696, 538, 3655, 10631, 64094,…	3590	196	16396	1.95734	7.49788e-07	8.14889e-09	7.54415e-09
GOTERM_BP_DIRECT	GO:0044267~cellular protein metabolic process	58	1.55371	1.25084e-10	653509, 5340, 7045, 9027, 5069, 4057, 3486, 3484, 3481, 351, 354, 3479, 796, 2147, 7316, 3630, 6622, 2627, 5617, 9476, 6441, 6440, 6288, 4069, 2243, 126961, 1471, 729238, 5071, 567, 325, 6439, 51816, 9246, 8352, 5045, 9445, 3021, 8350, 23621, 8351, 1755, 1512, 135, 1511, 335, 4240, 7276, 7311, 4322, 8361, 8362, 7270, 8360, 4312, 4313, 4878, 2934	3590	117	16396	2.26405	1.04345e-06	1.12186e-08	1.0386e-08
GOTERM_BP_DIRECT	GO:0050852~T cell receptor signaling pathway	67	1.7948	1.89744e-10	9861, 5063, 6794, 5663, 3123, 5062, 2625, 3119, 27242, 3117, 3115, 3113, 7316, 5698, 8767, 915, 27040, 3635, 916, 917, 919, 5594, 7294, 121665, 5707, 23291, 5708, 5709, 1147, 3126, 3125, 920, 5788, 5700, 9564, 7189, 4790, 4792, 8631, 9402, 5718, 5719, 3458, 5710, 10197, 7535, 5711, 5713, 5714, 3932, 5295, 7311, 5970, 5058, 3551, 7070, 5290, 5293, 5728, 2534, 940, 5688, 8517, 5721, 50943, 3702, 89…	3590	145	16396	2.11033	1.58285e-06	1.67446e-08	1.5502e-08
GOTERM_BP_DIRECT	GO:0000184~nuclear-transcribed mRNA catabolic process, nonsense-mediated decay	58	1.55371	1.90713e-10	6230, 6155, 6232, 6231, 6234, 6159, 6235, 2197, 6191, 23049, 6193, 6192, 6194, 2107, 127933, 51121, 6227, 6229, 6228, 5976, 9939, 5394, 6122, 6124, 6167, 6203, 6202, 25873, 3646, 3921, 4736, 6132, 6135, 6137, 6136, 6171, 6173, 6204, 6129, 6209, 6208, 6141, 6144, 6188, 6187, 6143, 6223, 7311, 6189, 6222, 9775, 6224, 26986, 55110, 6139, 6138, 6218, 6217	3590	118	16396	2.24486	1.59093e-06	1.67446e-08	1.5502e-08
GOTERM_BP_DIRECT	GO:0043525~positive regulation of neuron apoptotic process	30	0.803643	1.94994e-10	5063, 25, 8851, 5366, 1020, 7042, 7020, 472, 10018, 1499, 356, 6348, 4763, 9759, 998, 836, 255738, 2901, 7157, 3672, 9131, 581, 27113, 842, 468, 1386, 1728, 1649, 4835, 3725	3590	43	16396	3.18637	1.62664e-06	1.69421e-08	1.56848e-08
GOTERM_BP_DIRECT	GO:0042981~regulation of apoptotic process	88	2.35735	2.25764e-10	9540, 7001, 3486, 1020, 7040, 7161, 55240, 4170, 472, 1613, 672, 27242, 3717, 355, 598, 55367, 2662, 238, 10011, 6502, 5610, 317, 834, 5414, 637, 638, 916, 839, 10456, 8805, 3956, 7132, 7178, 7133, 58484, 64127, 7293, 3604, 841, 23098, 842, 1387, 602, 604, 649, 1508, 7187, 9564, 7188, 8996, 6772, 5366, 5245, 8797, 2099, 114769, 330, 332, 655, 2322, 811, 8626, 7415, 9518, 6446, 1958, 8200, 4041, 2…	3590	212	16396	1.89579	1.88332e-06	1.93877e-08	1.79489e-08
GOTERM_BP_DIRECT	GO:0022617~extracellular matrix disassembly	43	1.15189	2.2779e-10	5340, 6696, 5045, 9622, 1514, 1634, 1513, 1215, 2006, 1511, 3817, 3818, 2201, 100287171, 1991, 2200, 4323, 999, 10211, 7077, 7076, 5650, 4320, 4321, 4322, 2022, 682, 2, 960, 102, 2335, 1520, 4312, 5644, 4313, 4314, 649, 4811, 4316, 4317, 4318, 4319, 2934	3590	76	16396	2.58403	1.90022e-06	1.93877e-08	1.79489e-08
GOTERM_MF_DIRECT	GO:0004715~non-membrane spanning protein tyrosine kinase activity	31	0.830431	2.33275e-10	5580, 25, 6850, 27, 7465, 8576, 3716, 3717, 695, 3718, 79834, 5610, 7535, 8767, 1859, 3932, 157285, 7297, 4067, 4145, 3055, 2185, 1195, 7294, 660, 640, 2534, 10188, 5747, 6714, 3702	3557	46	16472	3.1208	5.81322e-07	2.42315e-08	2.3104e-08
GOTERM_BP_DIRECT	GO:0071260~cellular response to mechanical stimulus	41	1.09831	2.77058e-10	4790, 7100, 4055, 8797, 7040, 9020, 3759, 51284, 476, 355, 578, 3553, 9759, 5599, 834, 6548, 5734, 2729, 958, 5879, 1956, 3659, 7132, 7099, 8740, 7098, 5595, 6662, 3596, 2022, 183, 841, 51311, 943, 207, 5743, 4316, 4878, 4615, 8915, 1647	3590	71	16396	2.63736	2.31121e-06	2.31094e-08	2.13944e-08
GOTERM_BP_DIRECT	GO:0097190~apoptotic signaling pathway	41	1.09831	2.77058e-10	929, 8771, 29844, 29843, 23643, 148022, 1613, 7818, 27242, 695, 355, 356, 578, 952, 5578, 317, 857, 836, 958, 916, 7099, 7098, 7133, 8742, 8764, 7293, 581, 10922, 27113, 841, 940, 921, 5467, 5027, 8879, 943, 8737, 11035, 8718, 4217, 3429	3590	71	16396	2.63736	2.31121e-06	2.31094e-08	2.13944e-08
GOTERM_BP_DIRECT	GO:0030890~positive regulation of B cell proliferation	28	0.750067	3.31327e-10	114609, 1880, 59067, 57162, 148022, 596, 3558, 972, 952, 975, 79915, 10673, 958, 4208, 4282, 7099, 89780, 7037, 3596, 3574, 7293, 100, 54440, 115650, 3567, 3565, 604, 5788	3590	39	16396	3.27897	2.76392e-06	2.71155e-08	2.51032e-08
GOTERM_BP_DIRECT	GO:0032729~positive regulation of interferon-gamma production	31	0.830431	3.33842e-10	929, 9466, 22914, 7124, 29108, 282618, 3558, 84868, 8809, 51561, 3115, 3553, 3113, 3454, 7855, 4049, 8767, 916, 7099, 7474, 729230, 3594, 3394, 3592, 7294, 3329, 54440, 3105, 602, 3606, 10666	3590	46	16396	3.07785	2.78491e-06	2.71155e-08	2.51032e-08
GOTERM_BP_DIRECT	GO:0007584~response to nutrient	42	1.1251	3.34839e-10	6770, 6198, 6750, 6772, 6532, 1536, 410, 411, 3939, 335, 2642, 56477, 5313, 54658, 4049, 218, 317, 340024, 5315, 2729, 717, 916, 2180, 8520, 7274, 7412, 19, 2067, 3156, 9370, 64127, 3297, 462, 5728, 1268, 2730, 3565, 2475, 5468, 5447, 1728, 6915	3590	74	16396	2.59216	2.79322e-06	2.71155e-08	2.51032e-08
GOTERM_BP_DIRECT	GO:0006413~translational initiation	63	1.68765	4.26768e-10	6230, 8894, 6155, 6232, 6231, 6234, 6159, 6235, 2197, 6191, 23367, 6193, 6192, 6194, 1974, 51121, 6227, 6229, 6228, 1977, 6122, 8661, 6124, 6167, 6203, 6202, 8665, 25873, 83939, 9669, 3646, 3921, 4736, 6132, 6135, 6137, 6059, 6136, 6171, 6173, 51386, 6204, 8668, 6129, 6209, 6208, 6141, 6144, 6188, 6187, 6143, 6223, 7311, 6189, 6222, 6224, 26986, 10209, 6139, 6138, 6218, 6217, 1968	3590	135	16396	2.13133	3.5601e-06	3.42276e-08	3.16876e-08
GOTERM_BP_DIRECT	GO:0009612~response to mechanical stimulus	36	0.964372	5.24448e-10	6198, 4353, 8997, 6772, 59341, 1281, 891, 1634, 1116, 632, 4323, 6347, 3776, 5734, 10631, 2626, 7057, 58, 6387, 8061, 2185, 3371, 285, 3726, 3727, 10628, 623, 2354, 5027, 624, 56729, 5468, 6714, 3725, 5727, 2736	3590	59	16396	2.78672	4.37494e-06	4.16612e-08	3.85694e-08
GOTERM_BP_DIRECT	GO:0048146~positive regulation of fibroblast proliferation	34	0.910796	5.47271e-10	25, 2099, 1021, 7040, 990, 891, 1019, 4609, 972, 3479, 23063, 2621, 2069, 80169, 5159, 51548, 4724, 5319, 1956, 5591, 4282, 5371, 5154, 7474, 5155, 5156, 183, 79621, 2335, 302, 2255, 1869, 2837, 3725	3590	54	16396	2.8756	4.56533e-06	4.30641e-08	3.98682e-08
GOTERM_BP_DIRECT	GO:0097191~extrinsic apoptotic signaling pathway	29	0.776855	6.06983e-10	7124, 8797, 7040, 7042, 3717, 970, 3458, 355, 356, 10519, 3875, 3856, 939, 10038, 5371, 7098, 7133, 4088, 8742, 81537, 3592, 3570, 581, 3624, 51330, 841, 5027, 8737, 90865	3590	42	16396	3.1535	5.06344e-06	4.73163e-08	4.38049e-08
GOTERM_BP_DIRECT	GO:0070555~response to interleukin-1	25	0.669703	6.46688e-10	7189, 2056, 2690, 1116, 3554, 952, 9759, 5578, 6622, 3654, 8767, 2729, 4524, 3656, 5970, 6401, 64848, 169026, 166, 84676, 301, 11213, 6714, 3965, 4615	3590	33	16396	3.45995	5.39465e-06	4.94864e-08	4.5814e-08
GOTERM_BP_DIRECT	GO:0043491~protein kinase B signaling	25	0.669703	6.46688e-10	22933, 6352, 6198, 7301, 7124, 7040, 117145, 3479, 3611, 2621, 3553, 6348, 558, 6347, 958, 5076, 6662, 5290, 55273, 64805, 5728, 207, 7249, 10461, 1969	3590	33	16396	3.45995	5.39465e-06	4.94864e-08	4.5814e-08
GOTERM_BP_DIRECT	GO:0033138~positive regulation of peptidyl-serine phosphorylation	40	1.07152	7.22491e-10	7422, 7124, 5587, 8412, 1440, 7040, 551, 596, 673, 2621, 2641, 57521, 998, 6622, 10178, 857, 8767, 6789, 10411, 3976, 10456, 4282, 89780, 7474, 5058, 5894, 5290, 284, 7295, 4915, 2932, 3569, 29110, 960, 3589, 7349, 207, 5008, 408, 409	3590	70	16396	2.60979	6.02701e-06	5.47846e-08	5.07189e-08
GOTERM_BP_DIRECT	GO:0034097~response to cytokine	33	0.884008	7.75251e-10	58191, 4791, 6772, 5322, 2353, 1281, 4170, 9261, 596, 598, 554, 29126, 1650, 5914, 54, 7077, 5371, 7076, 7298, 7356, 9536, 5971, 8061, 3572, 3570, 3726, 3727, 3565, 6678, 7867, 3700, 3725, 3429	3590	52	16396	2.89837	6.46712e-06	5.82556e-08	5.39323e-08
GOTERM_BP_DIRECT	GO:0038083~peptidyl-tyrosine autophosphorylation	28	0.750067	8.06358e-10	6098, 25, 6850, 27, 3480, 3716, 3717, 695, 3718, 7535, 3932, 7297, 3791, 5595, 4067, 4145, 2066, 3055, 2185, 7294, 660, 640, 2534, 3643, 10188, 5747, 6714, 3702	3590	40	16396	3.19699	6.72661e-06	6.00521e-08	5.55955e-08
GOTERM_BP_DIRECT	GO:0030307~positive regulation of cell growth	45	1.20546	8.60977e-10	22954, 7046, 58191, 6279, 2395, 3484, 3021, 84717, 7042, 3084, 6195, 23404, 551, 596, 3558, 552, 1457, 1654, 3578, 2147, 57521, 952, 10519, 3872, 4323, 998, 3630, 6548, 6868, 1956, 5393, 6386, 9211, 2185, 2064, 3373, 6280, 3009, 102, 3249, 440093, 51176, 7349, 207, 2837	3590	84	16396	2.44668	7.18224e-06	6.35523e-08	5.8836e-08
GOTERM_BP_DIRECT	GO:0002224~toll-like receptor signaling pathway	22	0.589338	9.76344e-10	7187, 7099, 7098, 7189, 5641, 9261, 7184, 7096, 1514, 1513, 51284, 1520, 51311, 51135, 3654, 1508, 54106, 7867, 3656, 10333, 4615, 8915	3590	27	16396	3.72137	8.14463e-06	7.14359e-08	6.61345e-08
GOTERM_CC_DIRECT	GO:0043025~neuronal cell body	112	3.00027	1.02888e-09	7442, 6750, 5663, 5664, 7040, 7042, 51083, 3759, 3359, 3916, 92737, 10891, 998, 6900, 6240, 5792, 729230, 8301, 5796, 1471, 3249, 26047, 5027, 4975, 140767, 10300, 3921, 4218, 4856, 25, 6770, 4352, 6531, 7345, 7226, 6654, 1363, 23542, 2690, 773, 135, 774, 2048, 57521, 1233, 10519, 30009, 1917, 5798, 538, 659, 6647, 3776, 8829, 7077, 9378, 9775, 22861, 2185, 383, 4914, 1644, 55110, 23394, 821, 269…	3662	315	17735	1.72195	1.16058e-06	5.52656e-08	5.06602e-08
GOTERM_BP_DIRECT	GO:0042517~positive regulation of tyrosine phosphorylation of Stat3 protein	27	0.723279	1.05825e-09	3280, 7422, 6774, 59067, 3440, 3066, 3065, 2690, 9021, 23568, 1436, 3815, 3717, 2688, 51561, 133396, 3952, 3976, 3297, 3572, 3570, 3569, 1489, 3600, 5008, 3606, 50604	3590	38	16396	3.24507	8.82788e-06	7.62523e-08	7.05935e-08
GOTERM_BP_DIRECT	GO:0008203~cholesterol metabolic process	39	1.04474	1.06046e-09	8431, 9023, 6770, 6256, 22937, 5444, 1583, 26119, 27329, 351, 3638, 6927, 335, 336, 338, 6721, 4864, 3952, 3931, 3953, 255738, 10577, 9619, 4041, 8542, 3990, 6720, 3991, 19, 1050, 341, 3949, 3565, 348, 1584, 5467, 10682, 6713, 847	3590	68	16396	2.61938	8.84629e-06	7.62523e-08	7.05935e-08
GOTERM_BP_DIRECT	GO:0071456~cellular response to hypoxia	49	1.31262	1.17754e-09	5581, 23409, 2034, 3162, 596, 1179, 10891, 6548, 1978, 2627, 6285, 3091, 4780, 5034, 7015, 7291, 23411, 1788, 2475, 5467, 51378, 207, 5743, 1906, 6517, 6714, 1869, 9520, 22933, 4352, 5562, 7422, 5366, 3383, 4193, 891, 114131, 655, 2168, 3654, 3776, 6781, 4000, 4485, 7157, 2782, 5728, 27113, 79625	3590	96	16396	2.33114	9.82296e-06	8.39473e-08	7.77174e-08
GOTERM_MF_DIRECT	GO:0005088~Ras guanyl-nucleotide exchange factor activity	55	1.47335	1.23527e-09	4254, 3563, 3562, 3561, 3560, 3084, 153, 6708, 3716, 3559, 2668, 3717, 3558, 3718, 2069, 2904, 27040, 2902, 5979, 7010, 5154, 5155, 5156, 284, 3568, 3567, 801, 6710, 5747, 808, 9048, 9365, 6654, 2254, 2252, 1437, 3815, 2249, 1950, 2247, 2246, 5159, 815, 4747, 1956, 818, 9771, 4684, 2066, 2263, 2064, 2260, 2534, 2255, 3667	3557	115	16472	2.21476	3.07828e-06	1.23181e-07	1.17449e-07
GOTERM_BP_DIRECT	GO:0050727~regulation of inflammatory response	37	0.99116	1.2634e-09	6375, 23729, 2177, 253260, 2099, 29108, 2175, 197, 330, 3717, 10318, 8808, 1215, 3554, 29102, 2167, 834, 11343, 6542, 7356, 5970, 4067, 6401, 64127, 3055, 23476, 22861, 59272, 185, 2678, 171389, 301, 7128, 5743, 604, 4615, 50604	3590	63	16396	2.68228	1.05393e-05	8.93055e-08	8.2678e-08
GOTERM_BP_DIRECT	GO:0006898~receptor-mediated endocytosis	60	1.60729	1.36662e-09	58191, 9260, 3320, 2350, 3043, 26119, 3482, 3240, 154, 10216, 3959, 3512, 3039, 84000, 8542, 6441, 6288, 8301, 6678, 921, 4973, 923, 929, 4074, 5167, 4035, 5169, 4036, 3263, 7184, 8909, 1238, 1755, 54413, 213, 335, 259, 811, 338, 283420, 2209, 1956, 4360, 8685, 9332, 5298, 5651, 7113, 2580, 200576, 117156, 3426, 3949, 1201, 348, 5648, 948, 10487, 949, 56649	3590	129	16396	2.12425	1.14003e-05	9.579e-08	8.86813e-08
GOTERM_MF_DIRECT	GO:0019904~protein domain specific binding	84	2.2502	1.44423e-09	9146, 23647, 23405, 5340, 9463, 5781, 8655, 100506658, 64398, 5465, 2990, 7082, 3837, 3916, 476, 6907, 54875, 27243, 3553, 7514, 5534, 6622, 4204, 10411, 10971, 3170, 11190, 4780, 5310, 7137, 5873, 2120, 7291, 81559, 7052, 5590, 1822, 3169, 2475, 801, 3920, 409, 808, 8431, 6331, 7067, 6497, 8554, 7027, 64853, 1874, 7415, 339, 55823, 6767, 5119, 10278, 4988, 4747, 4627, 6804, 5914, 89780, 7430, 74…	3557	208	16472	1.87016	3.59902e-06	1.3848e-07	1.32036e-07
GOTERM_BP_DIRECT	GO:0051591~response to cAMP	30	0.803643	2.15112e-09	50506, 5020, 6531, 6772, 5322, 2353, 374, 673, 3939, 5313, 218, 5798, 4724, 7010, 7056, 5970, 6720, 5972, 8061, 2185, 1390, 6382, 3726, 682, 3727, 1843, 189, 2354, 6678, 3725	3590	46	16396	2.97856	1.79445e-05	1.49521e-07	1.38425e-07
GOTERM_BP_DIRECT	GO:0043406~positive regulation of MAP kinase activity	35	0.937584	2.68248e-09	50507, 7422, 7124, 4254, 5663, 8654, 7040, 3815, 2688, 2247, 3611, 1950, 2246, 2322, 2146, 1991, 2321, 5159, 10178, 3654, 958, 10454, 1956, 4208, 4282, 5154, 5155, 4486, 2064, 2260, 6283, 120892, 1906, 6714, 3845	3590	59	16396	2.70931	2.2377e-05	1.84914e-07	1.71191e-07
GOTERM_BP_DIRECT	GO:0048247~lymphocyte chemotaxis	22	0.589338	3.09561e-09	6362, 6361, 6364, 6355, 6366, 6376, 6288, 6346, 6357, 6356, 6367, 9560, 6360, 6370, 51192, 414062, 6348, 6369, 6347, 6358, 6349, 10344	3590	28	16396	3.58846	2.58233e-05	2.11644e-07	1.95937e-07
GOTERM_BP_DIRECT	GO:0051897~positive regulation of protein kinase B signaling	44	1.17868	3.37854e-09	50507, 7066, 7046, 7124, 7423, 1440, 253260, 2152, 7040, 3481, 3084, 2625, 10855, 1116, 1236, 2247, 3611, 2621, 6348, 558, 3630, 3952, 1956, 10456, 7494, 7010, 7057, 5154, 6366, 4486, 114897, 284, 7295, 1646, 3569, 2876, 2159, 940, 2475, 3643, 409, 5747, 6714, 3606	3590	84	16396	2.39231	2.81834e-05	2.29109e-07	2.12107e-07
GOTERM_BP_DIRECT	GO:0007169~transmembrane receptor protein tyrosine kinase signaling pathway	48	1.28583	4.21945e-09	6098, 4593, 6850, 27, 4233, 3084, 3480, 29760, 3716, 1436, 3815, 1435, 695, 2322, 2321, 238, 7535, 133396, 4920, 3932, 916, 5979, 1956, 4803, 7297, 7010, 3791, 4067, 4145, 2066, 3055, 2064, 7294, 660, 4914, 4915, 640, 2534, 4919, 920, 624, 3643, 10188, 924, 925, 3645, 926, 3702	3590	96	16396	2.28357	3.51981e-05	2.83826e-07	2.62763e-07
GOTERM_BP_DIRECT	GO:0031100~organ regeneration	30	0.803643	4.44146e-09	3082, 8013, 8431, 3482, 471, 570, 1019, 133, 2621, 335, 578, 336, 2322, 558, 54658, 6347, 5315, 6387, 4288, 285, 4837, 4519, 983, 2356, 4851, 5468, 306, 5469, 5228, 728	3590	47	16396	2.91519	3.705e-05	2.9637e-07	2.74376e-07
GOTERM_BP_DIRECT	GO:0045892~negative regulation of transcription, DNA-templated	165	4.42004	5.10306e-09	6597, 8535, 8091, 3087, 1063, 7040, 3084, 196, 2305, 2146, 27122, 79813, 4841, 10013, 4204, 10014, 8805, 5155, 4221, 5796, 22882, 7291, 7293, 81559, 23291, 51773, 51497, 4851, 30812, 406, 7329, 51655, 1869, 7341, 2290, 7189, 6375, 7067, 6015, 23028, 4193, 1998, 650, 652, 83933, 57761, 655, 2167, 84864, 9759, 811, 2729, 51548, 57649, 3659, 1999, 7474, 4087, 6662, 5970, 4089, 8841, 3398, 163126, 33…	3590	498	16396	1.51321	4.25688e-05	3.37814e-07	3.12745e-07
GOTERM_BP_DIRECT	GO:0002755~MyD88-dependent toll-like receptor signaling pathway	24	0.642915	5.667e-09	929, 7099, 7189, 114609, 7100, 7311, 23643, 7097, 7096, 3329, 10318, 695, 51284, 51311, 51135, 7316, 3654, 54106, 3656, 11213, 948, 10454, 10333, 4615	3590	33	16396	3.32155	4.7273e-05	3.69284e-07	3.41879e-07
GOTERM_BP_DIRECT	GO:0006958~complement activation, classical pathway	24	0.642915	5.667e-09	4153, 4179, 1380, 1191, 3426, 10747, 1378, 730, 720, 731, 710, 721, 3543, 732, 722, 712, 100423062, 715, 716, 727, 717, 1604, 718, 729	3590	33	16396	3.32155	4.7273e-05	3.69284e-07	3.41879e-07
GOTERM_BP_DIRECT	GO:0032355~response to estradiol	46	1.23225	6.02217e-09	5020, 5066, 6532, 6774, 2099, 7040, 2690, 374, 595, 2821, 2688, 4609, 1499, 655, 2146, 952, 5159, 811, 637, 836, 3952, 10631, 6529, 5914, 7035, 5111, 1471, 1490, 5728, 1843, 1788, 1027, 1544, 10628, 301, 841, 842, 3169, 2255, 920, 7349, 5743, 1728, 847, 5727, 3429	3590	91	16396	2.30866	5.02357e-05	3.89387e-07	3.6049e-07
GOTERM_CC_DIRECT	GO:0016324~apical plasma membrane	103	2.75917	6.68466e-09	23209, 100506658, 5420, 5664, 2151, 3084, 476, 2028, 634, 3753, 6868, 5030, 65010, 4582, 6520, 9076, 481, 362, 8140, 3249, 762, 523, 6513, 4851, 5304, 2319, 928, 1080, 9365, 5562, 2694, 1000, 4072, 29881, 3938, 10519, 5159, 659, 3776, 6781, 8842, 2064, 7070, 5728, 2335, 301, 10804, 1244, 4478, 947, 1803, 948, 50507, 50506, 6550, 8972, 6555, 3320, 7082, 8692, 1811, 154, 1139, 312, 11309, 83552, 65…	3662	291	17735	1.71418	7.54027e-06	3.42741e-07	3.14179e-07
GOTERM_BP_DIRECT	GO:0030183~B cell differentiation	37	0.99116	7.01427e-09	6670, 3442, 2033, 338376, 3440, 3087, 1380, 1316, 3439, 29760, 56832, 3718, 3456, 973, 974, 2322, 9759, 5897, 3676, 6868, 10014, 959, 7253, 5295, 9734, 7412, 3451, 4914, 3447, 3589, 3565, 3444, 3586, 57379, 604, 4436, 3688	3590	66	16396	2.56036	5.85113e-05	4.50046e-07	4.16648e-07
GOTERM_BP_DIRECT	GO:0071407~cellular response to organic cyclic compound	34	0.910796	7.15262e-09	5063, 6352, 6198, 4792, 7124, 6772, 4255, 6774, 8313, 7040, 5062, 891, 650, 3553, 6348, 6347, 836, 3655, 3956, 53829, 340061, 389058, 64127, 1051, 1050, 8480, 1545, 1027, 1543, 841, 688, 207, 3606, 2736	3590	58	16396	2.67728	5.96654e-05	4.5542e-07	4.21622e-07
GOTERM_MF_DIRECT	GO:0042056~chemoattractant activity	21	0.56255	8.30864e-09	3082, 4282, 6352, 5155, 6289, 7422, 6288, 6387, 7424, 7423, 2252, 6291, 6360, 3958, 652, 2247, 2277, 3146, 2255, 6348, 8846	3557	27	16472	3.60179	2.07049e-05	7.67165e-07	7.31468e-07
GOTERM_BP_DIRECT	GO:0042113~B cell activation	22	0.589338	8.89616e-09	9734, 5293, 3329, 55024, 1139, 684, 695, 1137, 643, 841, 973, 3565, 942, 9759, 8935, 89832, 7535, 54900, 5579, 200081, 958, 10014	3590	29	16396	3.46472	7.4209e-05	5.62143e-07	5.20425e-07
GOTERM_MF_DIRECT	GO:0005178~integrin binding	50	1.33941	9.19135e-09	7045, 2670, 3084, 27329, 310, 3479, 4323, 3678, 6868, 3911, 7450, 7057, 5034, 4067, 3694, 7412, 3491, 2515, 3688, 6714, 4856, 10666, 928, 11082, 6850, 6376, 63923, 3383, 1281, 3611, 2246, 2200, 811, 977, 3655, 1956, 2208, 7077, 4240, 11093, 3791, 10085, 7070, 1490, 1525, 102, 2335, 81, 8838, 87	3557	105	16472	2.20518	2.29046e-05	8.18359e-07	7.8028e-07
GOTERM_BP_DIRECT	GO:0048015~phosphatidylinositol-mediated signaling	50	1.33941	9.99112e-09	5781, 6198, 4254, 3084, 3480, 3479, 2069, 4803, 5154, 5155, 5156, 4586, 2475, 55615, 207, 9365, 5286, 5289, 2254, 253260, 2252, 1436, 3815, 2249, 1950, 2247, 2246, 930, 5159, 3932, 1956, 5295, 7430, 5298, 2066, 2263, 2064, 5290, 2260, 5293, 4914, 5728, 387, 2534, 940, 941, 942, 2255, 79109, 3667	3590	104	16396	2.19574	8.33424e-05	6.26586e-07	5.80086e-07
GOTERM_MF_DIRECT	GO:0001077~transcriptional activator activity, RNA polymerase II core promoter proximal region sequence-specific binding	90	2.41093	1.00846e-08	8013, 8576, 5465, 2353, 1385, 2034, 64710, 8091, 30062, 3164, 7161, 2625, 2624, 3239, 10538, 2623, 4609, 2302, 2908, 50674, 4802, 4208, 3091, 4782, 5079, 6720, 9314, 2000, 8061, 2120, 3131, 3172, 7294, 3726, 64919, 367, 51176, 688, 3169, 2354, 79800, 1386, 4774, 1628, 1747, 3725, 5241, 4791, 6495, 7023, 3662, 6774, 2099, 7020, 140690, 6927, 1874, 2004, 2002, 8626, 6688, 253738, 1958, 4901, 1879, …	3557	236	16472	1.76601	2.51304e-05	8.66925e-07	8.26587e-07
GOTERM_BP_DIRECT	GO:0042632~cholesterol homeostasis	36	0.964372	1.03515e-08	6296, 8399, 27346, 1581, 2053, 26119, 27329, 2170, 335, 336, 10938, 2167, 338, 4864, 857, 4547, 859, 3931, 255738, 10577, 9619, 7494, 4041, 7851, 3990, 19, 23411, 1645, 3949, 345, 29116, 348, 55937, 3606, 949, 2538	3590	64	16396	2.56901	8.63481e-05	6.44339e-07	5.96522e-07
GOTERM_MF_DIRECT	GO:0050839~cell adhesion molecule binding	35	0.937584	1.05484e-08	5781, 23705, 3683, 81607, 1363, 22871, 201633, 5817, 5818, 5819, 54413, 2244, 2266, 4345, 6402, 999, 10178, 912, 5777, 3676, 10631, 9378, 3690, 7430, 7412, 2243, 259197, 1525, 1366, 57555, 4478, 10288, 3688, 3689, 10666	3557	62	16472	2.6142	2.62862e-05	8.76568e-07	8.35781e-07
GOTERM_BP_DIRECT	GO:0007159~leukocyte cell-cell adhesion	20	0.535762	1.23849e-08	7430, 6352, 6850, 6401, 3683, 7412, 3383, 6093, 10318, 4907, 796, 6403, 30835, 4478, 10332, 3676, 3688, 3689, 3678, 959	3590	25	16396	3.6537	0.00010331	7.65205e-07	7.08417e-07
GOTERM_BP_DIRECT	GO:0001701~in utero embryonic development	76	2.0359	1.26989e-08	8178, 8894, 4097, 7046, 25949, 3087, 23764, 2625, 10018, 2821, 2623, 4609, 598, 1499, 126206, 8846, 118, 5930, 6426, 3633, 10454, 2627, 4846, 3714, 9817, 4582, 5310, 1909, 8061, 7291, 284, 51493, 367, 4851, 30812, 7403, 1906, 3688, 727, 729, 4154, 6256, 7422, 2296, 9241, 23028, 6491, 29924, 29123, 891, 650, 6608, 338, 538, 4624, 4627, 89780, 9133, 9573, 4087, 4088, 4089, 4245, 2263, 2260, 55273, …	3590	187	16396	1.85616	0.000105929	7.78835e-07	7.21036e-07
GOTERM_MF_DIRECT	GO:0003682~chromatin binding	133	3.56282	1.30905e-08	4297, 8535, 6871, 9985, 5422, 64710, 2033, 3087, 1063, 84717, 7161, 6591, 4292, 3239, 1059, 1058, 2146, 5897, 4841, 4204, 9219, 10499, 10014, 4208, 10413, 8805, 5431, 4221, 367, 23054, 5424, 4335, 1747, 2956, 4591, 6495, 5562, 10194, 4353, 6497, 5563, 6015, 23028, 2168, 9759, 11168, 51548, 57649, 51547, 6925, 8320, 4087, 6662, 5970, 4089, 5971, 10361, 8841, 121643, 2852, 1488, 23394, 546, 55636, …	3557	391	16472	1.57521	3.26211e-05	1.05273e-06	1.00375e-06
GOTERM_CC_DIRECT	GO:0015935~small ribosomal subunit	20	0.535762	1.32827e-08	6230, 6188, 6187, 6231, 6234, 6222, 6203, 6224, 6235, 6191, 2197, 6193, 6194, 7818, 6227, 6229, 6217, 6228, 6209, 3921	3662	26	17735	3.72537	1.49828e-05	6.51432e-07	5.97146e-07
GOTERM_BP_DIRECT	GO:0042730~fibrinolysis	18	0.482186	1.40622e-08	5340, 5054, 5055, 5345, 2243, 2161, 3848, 2811, 3818, 2147, 302, 710, 2244, 2266, 5327, 5328, 5329, 5627	3590	21	16396	3.91468	0.0001173	8.56154e-07	7.92617e-07
GOTERM_BP_DIRECT	GO:0050829~defense response to Gram-negative bacterium	32	0.857219	1.5255e-08	7100, 29108, 351, 79792, 671, 133, 796, 1113, 51561, 1673, 1672, 29102, 6403, 4843, 11126, 7099, 5054, 7432, 6863, 4069, 8764, 2220, 3570, 3569, 3929, 566, 820, 567, 920, 4852, 54106, 1669	3590	54	16396	2.70645	0.000127249	9.22042e-07	8.53616e-07
GOTERM_BP_DIRECT	GO:0007259~JAK-STAT cascade	23	0.616126	1.822e-08	8651, 729230, 6773, 6772, 5310, 8554, 6775, 5311, 6774, 2690, 9021, 101180976, 282617, 282618, 282616, 3717, 2688, 3601, 3455, 3454, 6347, 6776, 133396	3590	32	16396	3.28263	0.00015198	1.08552e-06	1.00497e-06
GOTERM_BP_DIRECT	GO:0001974~blood vessel remodeling	23	0.616126	1.822e-08	8996, 729230, 2034, 2296, 182, 183, 7042, 581, 4193, 7052, 186, 54567, 578, 2255, 84870, 558, 659, 55636, 538, 3976, 4846, 4208, 1636	3590	32	16396	3.28263	0.00015198	1.08552e-06	1.00497e-06
GOTERM_BP_DIRECT	GO:0010951~negative regulation of endopeptidase activity	54	1.44656	1.99605e-08	5265, 5266, 5267, 5268, 5345, 6590, 197, 351, 831, 710, 5973, 718, 12, 5037, 5270, 2, 684, 720, 721, 5104, 207, 6317, 4018, 727, 6318, 5627, 6692, 7980, 5045, 114769, 27344, 1476, 259, 1475, 1992, 3730, 3699, 3933, 7077, 7076, 5054, 7035, 5055, 1293, 183, 440068, 9097, 462, 10406, 3827, 51232, 51156, 3700, 56925	3590	118	16396	2.09004	0.000166497	1.18078e-06	1.09316e-06
GOTERM_BP_DIRECT	GO:0030449~regulation of complement activation	22	0.589338	2.35123e-08	5199, 4179, 3075, 3426, 1378, 730, 720, 731, 721, 732, 722, 11331, 966, 727, 717, 629, 728, 1604, 718, 729, 5627, 719	3590	30	16396	3.34923	0.00019612	1.37144e-06	1.26966e-06
GOTERM_BP_DIRECT	GO:0006956~complement activation	22	0.589338	2.35123e-08	4153, 5199, 2220, 3075, 1191, 10747, 1675, 730, 720, 731, 721, 732, 712, 715, 716, 727, 717, 5648, 629, 718, 729, 2219	3590	30	16396	3.34923	0.00019612	1.37144e-06	1.26966e-06
GOTERM_BP_DIRECT	GO:0042475~odontogenesis of dentin-containing tooth	32	0.857219	2.76391e-08	7189, 6331, 25928, 4771, 2296, 3066, 3065, 29123, 133, 650, 6608, 10018, 2249, 652, 1896, 1499, 655, 8626, 3911, 3714, 4782, 3371, 581, 682, 760, 64919, 51176, 2255, 6336, 6899, 1747, 2736	3590	55	16396	2.65724	0.000230539	1.60096e-06	1.48215e-06
GOTERM_MF_DIRECT	GO:0032403~protein complex binding	80	2.14305	2.86869e-08	8453, 23209, 3880, 4893, 5465, 3683, 22796, 22994, 472, 56852, 1019, 595, 4609, 796, 2908, 5214, 4524, 836, 50632, 9978, 10454, 8408, 4261, 5792, 6720, 5906, 1027, 841, 8737, 328, 6237, 11035, 3688, 3689, 197259, 409, 3845, 10787, 8936, 5903, 7385, 8431, 7067, 6531, 26, 4792, 22937, 8631, 4035, 23542, 1161, 4072, 6928, 10998, 4905, 731, 2322, 57521, 732, 2200, 5479, 6767, 859, 3856, 4704, 5250, 7…	3557	206	16472	1.7984	7.14852e-05	2.23489e-06	2.1309e-06
GOTERM_BP_DIRECT	GO:0032689~negative regulation of interferon-gamma production	21	0.56255	2.96978e-08	7099, 8993, 6375, 7356, 3123, 9173, 2625, 84868, 10859, 2621, 29126, 3126, 3586, 3146, 558, 5621, 80380, 90865, 50943, 3965, 5914	3590	28	16396	3.42535	0.000247709	1.70834e-06	1.58156e-06
GOTERM_CC_DIRECT	GO:0043209~myelin sheath	62	1.66086	3.04395e-08	3320, 2670, 2821, 596, 476, 2665, 2664, 2026, 3313, 10938, 998, 10376, 5414, 6900, 6624, 10015, 1738, 1737, 9118, 5354, 11076, 1152, 481, 3329, 760, 5906, 523, 60, 7385, 22933, 7345, 5245, 292, 4190, 4705, 4905, 498, 213, 7415, 1917, 5315, 71, 6647, 2806, 6648, 4747, 5250, 9377, 4282, 7430, 5375, 2782, 26227, 2064, 7070, 23114, 79784, 821, 4478, 6812, 3309, 3945	3662	152	17735	1.97543	3.43352e-05	1.43066e-06	1.31144e-06
GOTERM_MF_DIRECT	GO:0001047~core promoter binding	35	0.937584	3.07485e-08	257101, 7080, 2033, 170506, 8091, 3066, 3065, 2623, 1871, 2146, 1870, 2002, 9759, 6688, 4841, 50674, 10013, 10014, 10379, 9575, 7494, 5430, 5971, 9314, 861, 4851, 3642, 406, 5469, 6932, 2959, 50943, 1869, 5925, 1647	3557	64	16472	2.53251	7.66223e-05	2.32291e-06	2.21482e-06
GOTERM_BP_DIRECT	GO:0050918~positive chemotaxis	24	0.642915	3.20669e-08	3082, 4282, 6352, 5155, 6289, 7422, 6288, 6387, 7424, 4233, 2252, 6291, 6360, 284, 3958, 652, 2247, 2277, 3146, 2255, 6348, 8846, 7249, 8829	3590	35	16396	3.13175	0.000267467	1.83199e-06	1.69603e-06
GOTERM_BP_DIRECT	GO:0032481~positive regulation of type I interferon production	30	0.803643	3.23798e-08	929, 4790, 4791, 5441, 6850, 7520, 3661, 1660, 2033, 170506, 51082, 79132, 1499, 115004, 81030, 3654, 3659, 51428, 51728, 5591, 5970, 340061, 27297, 29110, 1387, 3665, 56829, 6778, 55718, 4615	3590	50	16396	2.74028	0.000270076	1.83728e-06	1.70093e-06
GOTERM_BP_DIRECT	GO:0032755~positive regulation of interleukin-6 production	28	0.750067	3.56491e-08	7124, 29108, 23586, 148022, 8808, 10417, 51284, 3553, 8767, 7099, 7098, 7474, 3552, 64127, 3570, 7097, 3329, 3569, 3929, 27177, 5027, 7349, 90865, 10288, 54106, 5603, 948, 4615	3590	45	16396	2.84177	0.00029734	2.00911e-06	1.86001e-06
GOTERM_BP_DIRECT	GO:0032757~positive regulation of interleukin-8 production	20	0.535762	3.65111e-08	7099, 7098, 5054, 114609, 7100, 7124, 9370, 64127, 23586, 7097, 3304, 51284, 3303, 796, 3929, 3553, 8737, 54106, 57506, 1649	3590	26	16396	3.51318	0.000304529	2.04389e-06	1.89221e-06
GOTERM_BP_DIRECT	GO:0032092~positive regulation of protein binding	34	0.910796	3.87856e-08	6872, 1440, 2033, 1020, 2051, 148022, 6708, 650, 652, 57761, 2641, 118, 119, 857, 10211, 6789, 1636, 89780, 7474, 7015, 4221, 5310, 340061, 3077, 5071, 26206, 121665, 2932, 10769, 567, 120892, 2035, 408, 5901	3590	61	16396	2.54561	0.000323497	2.15674e-06	1.99668e-06
GOTERM_BP_DIRECT	GO:0042742~defense response to bacterium	54	1.44656	4.00928e-08	5580, 5861, 6279, 338376, 3240, 100423062, 4843, 57506, 10333, 10578, 7099, 7132, 7098, 6441, 6364, 5473, 5199, 4025, 58484, 64127, 6280, 6283, 727897, 7096, 1668, 55894, 602, 6372, 4153, 7100, 6850, 4353, 3458, 3456, 1673, 1672, 1991, 9636, 100507436, 1053, 22861, 1051, 3394, 338339, 820, 3543, 3586, 117159, 57817, 306, 10563, 6779, 54106, 51316	3590	120	16396	2.05521	0.000334398	2.21466e-06	2.05031e-06
GOTERM_BP_DIRECT	GO:0044130~negative regulation of growth of symbiont in host	15	0.401822	4.32675e-08	114609, 4153, 4353, 7124, 3394, 3458, 1511, 3929, 820, 3586, 1991, 4049, 8878, 948, 4615	3590	16	16396	4.28169	0.000360872	2.3743e-06	2.1981e-06
GOTERM_BP_DIRECT	GO:0043627~response to estrogen	35	0.937584	4.41965e-08	6770, 10095, 3880, 2056, 2033, 2099, 3320, 3162, 51083, 2625, 595, 672, 410, 411, 3939, 335, 632, 336, 4323, 5159, 5798, 857, 4986, 2629, 2627, 7010, 5594, 1594, 1392, 3329, 760, 3566, 1244, 5468, 7706	3590	64	16396	2.49765	0.000368619	2.40943e-06	2.23062e-06
GOTERM_MF_DIRECT	GO:0005179~hormone activity	45	1.20546	4.62606e-08	7066, 4295, 9365, 6750, 5443, 5741, 2056, 3481, 6370, 1081, 133, 2688, 114131, 3479, 796, 2641, 2520, 2200, 170589, 3630, 3972, 3952, 5617, 7276, 6781, 7432, 8862, 7038, 9370, 1392, 183, 252995, 3624, 3623, 122876, 268, 1444, 1443, 2796, 2695, 57817, 56729, 1906, 5744, 4879	3557	94	16472	2.21691	0.000115275	3.39199e-06	3.23416e-06
GOTERM_BP_DIRECT	GO:0051091~positive regulation of sequence-specific DNA binding transcription factor activity	49	1.31262	4.65246e-08	22954, 6597, 7124, 6598, 29108, 2033, 8091, 81603, 23082, 3717, 1499, 3553, 10891, 50674, 10014, 57506, 8061, 54360, 3569, 3567, 3169, 3565, 1386, 207, 5468, 1906, 5987, 85363, 10346, 4591, 7189, 7188, 7984, 2099, 23586, 23028, 3815, 53840, 9759, 89780, 4041, 2100, 5728, 4838, 3586, 11331, 306, 6737, 7706	3590	105	16396	2.13133	0.000388033	2.51988e-06	2.33288e-06
GOTERM_BP_DIRECT	GO:0050718~positive regulation of interleukin-1 beta secretion	18	0.482186	4.91693e-08	91662, 22900, 7474, 9447, 24145, 29108, 64127, 22861, 114548, 79792, 3458, 55655, 3146, 3454, 5027, 6348, 834, 3965	3590	22	16396	3.73674	0.000410086	2.64594e-06	2.44958e-06
GOTERM_BP_DIRECT	GO:0032720~negative regulation of tumor necrosis factor production	25	0.669703	5.04942e-08	5443, 5004, 671, 1139, 84868, 2621, 558, 89832, 6504, 5914, 54, 7099, 9370, 3297, 7291, 3929, 3586, 7128, 5987, 947, 50943, 706, 11213, 409, 3965	3590	38	16396	3.00469	0.000421134	2.68451e-06	2.48529e-06
GOTERM_BP_DIRECT	GO:0006366~transcription from RNA polymerase II promoter	165	4.42004	5.05297e-08	9188, 4297, 6872, 6871, 6874, 2034, 64710, 2033, 8091, 7161, 196, 2305, 10538, 51087, 3239, 6908, 4609, 2302, 50674, 4208, 8805, 10379, 3091, 5430, 5431, 8544, 3131, 3097, 7294, 51497, 79800, 4335, 6877, 1628, 2959, 408, 409, 1747, 6495, 7067, 5441, 4990, 3661, 3662, 2296, 9242, 2966, 6927, 1874, 2963, 2962, 2960, 7975, 659, 4901, 1879, 3659, 1999, 9015, 6660, 4087, 5452, 64344, 6662, 5970, 4089,…	3590	513	16396	1.46896	0.00042143	2.68451e-06	2.48529e-06
GOTERM_BP_DIRECT	GO:0007597~blood coagulation, intrinsic pathway	16	0.42861	5.09863e-08	7450, 2161, 2160, 350, 2811, 2, 3827, 3818, 2159, 2147, 2158, 710, 2157, 5547, 2815, 2814	3590	18	16396	4.05967	0.000425238	2.69163e-06	2.49188e-06
GOTERM_CC_DIRECT	GO:0043235~receptor complex	54	1.44656	5.18324e-08	7046, 1380, 3480, 351, 154, 51284, 55600, 3953, 5979, 7253, 7132, 3690, 3694, 57192, 3566, 4851, 8737, 4973, 3643, 53831, 3688, 4854, 3645, 3689, 5284, 4593, 6256, 7421, 4035, 4036, 2690, 1950, 2321, 4543, 4547, 4306, 8829, 1956, 4041, 7433, 4088, 2066, 2022, 2064, 2260, 4914, 4915, 3949, 4919, 84059, 7108, 3821, 3822, 3824	3662	127	17735	2.05922	5.84652e-05	2.33868e-06	2.14379e-06
GOTERM_BP_DIRECT	GO:0038095~Fc-epsilon receptor signaling pathway	55	1.47335	5.37409e-08	9861, 4893, 4772, 2353, 5062, 7316, 5698, 5534, 27040, 10454, 5594, 5595, 4067, 5707, 23291, 5708, 5709, 1147, 801, 5700, 3845, 3725, 808, 7189, 4790, 4792, 6850, 6654, 9402, 2206, 5718, 2205, 695, 5719, 5599, 5710, 10197, 5711, 5713, 5714, 5879, 5295, 7311, 5970, 5058, 3551, 5290, 5609, 5688, 8517, 5721, 5601, 5602, 3702, 8915	3590	124	16396	2.02574	0.000448206	2.8192e-06	2.60998e-06
GOTERM_BP_DIRECT	GO:0010332~response to gamma radiation	22	0.589338	5.7801e-08	5591, 5371, 5562, 6354, 7157, 4221, 2177, 7161, 581, 142, 2625, 596, 2876, 4609, 675, 578, 8626, 6347, 339, 5788, 6648, 3627	3590	31	16396	3.24119	0.00048206	3.01324e-06	2.78962e-06
GOTERM_MF_DIRECT	GO:0005164~tumor necrosis factor receptor binding	21	0.56255	5.93989e-08	7187, 8740, 4591, 7189, 8743, 6772, 7124, 8741, 9577, 8742, 4050, 970, 1896, 356, 841, 944, 4049, 10131, 9966, 10673, 959	3557	29	16472	3.35339	0.000148011	4.2309e-06	4.03404e-06
GOTERM_CC_DIRECT	GO:0031410~cytoplasmic vesicle	84	2.2502	5.96888e-08	8651, 5064, 23209, 100506658, 4210, 5663, 8411, 8372, 8692, 23205, 25824, 472, 55245, 115362, 552, 2028, 58476, 4323, 119, 10211, 50632, 3678, 10456, 7851, 64123, 5872, 7852, 3373, 283, 3601, 2039, 120892, 51652, 84557, 51257, 113451, 6317, 140767, 408, 409, 728, 2319, 50848, 4077, 5321, 28514, 59341, 23621, 148022, 695, 335, 100287171, 81631, 55704, 5159, 7018, 857, 6647, 858, 8829, 10479, 3736,…	3662	232	17735	1.75349	6.73267e-05	2.58957e-06	2.37378e-06
GOTERM_CC_DIRECT	GO:0000790~nuclear chromatin	73	1.95553	6.54354e-08	5460, 5066, 6597, 6872, 4772, 6874, 6598, 1385, 64710, 6591, 2625, 6908, 2146, 9219, 4582, 5991, 4221, 9314, 1791, 23411, 7290, 3726, 3727, 3009, 3007, 367, 3005, 1387, 5467, 60, 6877, 341567, 1869, 2956, 6256, 6772, 6774, 5884, 3024, 2099, 3066, 3065, 23028, 3183, 5916, 1677, 1874, 3014, 8626, 6688, 84464, 6925, 5914, 3659, 8520, 8289, 4087, 4088, 5970, 7157, 4089, 10361, 9611, 6862, 1051, 57332…	3662	193	17735	1.8318	7.38084e-05	2.73375e-06	2.50593e-06
GOTERM_BP_DIRECT	GO:0008630~intrinsic apoptotic signaling pathway in response to DNA damage	28	0.750067	6.83078e-08	9641, 25, 7124, 7161, 3162, 4170, 4292, 472, 672, 10018, 596, 597, 598, 578, 6648, 5591, 7132, 5371, 5295, 7133, 1396, 23411, 581, 842, 4776, 1969, 1869, 2956	3590	46	16396	2.77999	0.000569661	3.53885e-06	3.27623e-06
GOTERM_BP_DIRECT	GO:0097421~liver regeneration	21	0.56255	7.59238e-08	6790, 6430, 7298, 6143, 5111, 4792, 9104, 3077, 7040, 1051, 3162, 595, 5906, 4609, 2146, 3586, 57817, 6229, 6217, 6426, 1956	3590	29	16396	3.30723	0.000633156	3.90914e-06	3.61903e-06
GOTERM_BP_DIRECT	GO:0050853~B cell receptor signaling pathway	23	0.616126	9.73174e-08	9564, 25, 5594, 6850, 4067, 4332, 1493, 5293, 640, 596, 695, 973, 930, 974, 3543, 952, 100423062, 7535, 5579, 5777, 5788, 3932, 4208	3590	34	16396	3.08953	0.000811492	4.94954e-06	4.58222e-06
GOTERM_BP_DIRECT	GO:0043330~response to exogenous dsRNA	23	0.616126	9.73174e-08	7098, 9188, 5594, 4792, 6520, 5595, 3661, 3442, 23586, 170506, 338376, 3440, 3451, 148022, 3439, 56832, 3447, 1653, 3456, 3444, 3764, 8767, 11213	3590	34	16396	3.08953	0.000811492	4.94954e-06	4.58222e-06
GOTERM_MF_DIRECT	GO:0042605~peptide antigen binding	19	0.508974	9.82137e-08	6890, 6892, 3123, 3133, 3077, 8140, 2217, 3119, 3107, 3106, 3117, 3105, 3115, 3126, 3125, 3113, 30835, 10332, 11136	3557	25	16472	3.51946	0.000244719	6.8013e-06	6.48483e-06
GOTERM_BP_DIRECT	GO:0009611~response to wounding	34	0.910796	1.08801e-07	6790, 5460, 6430, 9002, 6198, 2252, 2670, 1020, 3087, 7040, 2151, 7042, 133, 177, 4609, 2149, 2147, 6347, 10894, 5879, 8829, 7450, 5154, 729230, 5155, 5653, 1230, 1490, 3371, 1524, 1543, 2335, 6657, 43	3590	63	16396	2.4648	0.000907204	5.50004e-06	5.09187e-06
GOTERM_MF_DIRECT	GO:0048020~CCR chemokine receptor binding	18	0.482186	1.20869e-07	6362, 6361, 6375, 6364, 6355, 6366, 6376, 6346, 6357, 6356, 6367, 9560, 6360, 414062, 6369, 6358, 6349, 10344	3557	23	16472	3.62416	0.000301159	8.14393e-06	7.76499e-06
GOTERM_BP_DIRECT	GO:0046686~response to cadmium ion	19	0.508974	1.2299e-07	7015, 5111, 6652, 5741, 23498, 383, 4519, 2821, 1027, 983, 567, 5621, 6678, 4864, 5601, 2729, 847, 2937, 6648	3590	25	16396	3.47102	0.00102545	6.14286e-06	5.68699e-06
GOTERM_BP_DIRECT	GO:0032735~positive regulation of interleukin-12 production	19	0.508974	1.2299e-07	7099, 7098, 114609, 3394, 7097, 3329, 177, 3458, 1236, 51561, 3620, 3146, 3135, 3663, 8767, 54106, 958, 948, 959	3590	25	16396	3.47102	0.00102545	6.14286e-06	5.68699e-06
GOTERM_BP_DIRECT	GO:0042110~T cell activation	28	0.750067	1.27058e-07	3662, 1139, 84941, 1650, 3454, 89832, 7535, 914, 27040, 916, 917, 80381, 64581, 8740, 4088, 5293, 3329, 100, 2534, 841, 941, 942, 924, 925, 50943, 1803, 926, 3702	3590	47	16396	2.72084	0.00105936	6.30829e-06	5.84014e-06
GOTERM_BP_DIRECT	GO:0043154~negative regulation of cysteine-type endopeptidase activity involved in apoptotic process	36	0.964372	1.28749e-07	3082, 7422, 3164, 23204, 25824, 6195, 4193, 551, 2821, 332, 1457, 135, 1654, 2621, 2168, 6622, 4803, 939, 8740, 7057, 5076, 5894, 9314, 1032, 2537, 27074, 3569, 2876, 960, 51176, 207, 5447, 408, 7429, 409, 6714	3590	69	16396	2.38285	0.00107345	6.35442e-06	5.88284e-06
GOTERM_BP_DIRECT	GO:0042100~B cell proliferation	22	0.589338	1.33365e-07	5580, 3442, 338376, 3440, 3451, 1380, 3329, 3439, 56832, 596, 3447, 3456, 51176, 973, 3444, 3586, 931, 3575, 5788, 958, 959, 4208	3590	32	16396	3.1399	0.00111191	6.5435e-06	6.0579e-06
GOTERM_BP_DIRECT	GO:0002223~stimulatory C-type lectin receptor signaling pathway	48	1.28583	1.41101e-07	9861, 5063, 5580, 7189, 4790, 22914, 6850, 4792, 4893, 2033, 5062, 5718, 5719, 5698, 7316, 5710, 10197, 5711, 5713, 5714, 10454, 170482, 64581, 7311, 5970, 4067, 5058, 5894, 5971, 3551, 5707, 338339, 23291, 5708, 5709, 2534, 1147, 1387, 30835, 5566, 8517, 5721, 5688, 5567, 5700, 6714, 3845, 8915	3590	105	16396	2.08783	0.00117637	6.8826e-06	6.37183e-06
GOTERM_BP_DIRECT	GO:0042130~negative regulation of T cell proliferation	24	0.642915	1.47386e-07	339390, 6441, 7356, 8654, 3123, 26279, 1493, 64844, 7040, 1051, 57162, 3559, 27242, 84868, 10859, 2302, 3126, 3620, 3586, 3135, 10288, 5777, 50943, 80381	3590	37	16396	2.96246	0.00122874	7.14738e-06	6.61696e-06
GOTERM_BP_DIRECT	GO:0032733~positive regulation of interleukin-10 production	18	0.482186	1.49814e-07	3082, 7099, 6375, 4179, 64127, 201633, 7097, 3329, 54440, 51561, 940, 3565, 3146, 9308, 10464, 54106, 947, 959	3590	23	16396	3.57428	0.00124897	7.18213e-06	6.64914e-06
GOTERM_BP_DIRECT	GO:0051726~regulation of cell cycle	54	1.44656	1.49825e-07	6430, 6792, 7248, 2033, 1063, 472, 2305, 6502, 4600, 3952, 91768, 8864, 115426, 8021, 3726, 3727, 342977, 23097, 1024, 7249, 4335, 406, 5788, 5469, 3688, 6714, 4616, 3725, 22933, 22858, 7465, 6651, 6774, 891, 2247, 55787, 578, 1870, 932, 613, 3659, 9133, 5891, 8567, 23435, 5728, 3623, 1487, 984, 104, 51755, 4117, 5925, 1647	3590	124	16396	1.98891	0.00124906	7.18213e-06	6.64914e-06
GOTERM_BP_DIRECT	GO:0070932~histone H3 deacetylation	17	0.455398	1.74957e-07	22933, 8864, 9734, 8841, 23410, 3066, 23411, 3065, 79885, 83933, 51564, 55869, 9759, 56916, 10013, 51547, 10014	3590	21	16396	3.6972	0.00145843	8.33897e-06	7.72012e-06
GOTERM_BP_DIRECT	GO:0042523~positive regulation of tyrosine phosphorylation of Stat5 protein	15	0.401822	1.95354e-07	5175, 2056, 3562, 2066, 2690, 1437, 3815, 3717, 3558, 2688, 2534, 3479, 51561, 3565, 133396	3590	17	16396	4.02982	0.00162832	9.1542e-06	8.47485e-06
GOTERM_BP_DIRECT	GO:2000811~negative regulation of anoikis	15	0.401822	1.95354e-07	7088, 5166, 5290, 4170, 6591, 4915, 596, 598, 1048, 4851, 857, 3688, 3678, 5747, 6714	3590	17	16396	4.02982	0.00162832	9.1542e-06	8.47485e-06
GOTERM_BP_DIRECT	GO:0032722~positive regulation of chemokine production	15	0.401822	1.95354e-07	7099, 7098, 3091, 7124, 3570, 7097, 2867, 3569, 84868, 51284, 3929, 5610, 8767, 54106, 6868	3590	17	16396	4.02982	0.00162832	9.1542e-06	8.47485e-06
GOTERM_CC_DIRECT	GO:0016323~basolateral plasma membrane	68	1.82159	2.0349e-07	5064, 23209, 8650, 6554, 4179, 3320, 7082, 476, 312, 1499, 479, 912, 6548, 10211, 10257, 3953, 5030, 7010, 65010, 5155, 5310, 4025, 6521, 64127, 3570, 9990, 481, 360, 361, 760, 366, 762, 6513, 768, 408, 409, 728, 2319, 1080, 23705, 5167, 1000, 4072, 28234, 117247, 538, 857, 6768, 4547, 1956, 10599, 7430, 4363, 7037, 7039, 2066, 1131, 2064, 6580, 1525, 3949, 1048, 301, 302, 1366, 4478, 54106, 1605	3662	180	17735	1.82957	0.00022951	8.19772e-06	7.51458e-06
GOTERM_BP_DIRECT	GO:1901215~negative regulation of neuron death	25	0.669703	2.06006e-07	5465, 6774, 2056, 1440, 1385, 1020, 2690, 1499, 1113, 10891, 6622, 5536, 2629, 3596, 3297, 23411, 5071, 3569, 120892, 348, 7349, 8517, 207, 5700, 947	3590	40	16396	2.85446	0.00171703	9.59944e-06	8.88705e-06
GOTERM_BP_DIRECT	GO:0032715~negative regulation of interleukin-6 production	20	0.535762	2.41638e-07	3082, 7099, 7124, 5004, 26525, 79671, 671, 1139, 84868, 2621, 3586, 89832, 7128, 6504, 54106, 2629, 408, 50943, 11213, 409	3590	28	16396	3.26224	0.00201371	1.11354e-05	1.0309e-05
GOTERM_BP_DIRECT	GO:2000352~negative regulation of endothelial cell apoptotic process	20	0.535762	2.41638e-07	7010, 5054, 4780, 25, 7015, 3791, 2243, 3596, 3383, 284, 2625, 673, 3589, 2621, 79625, 3565, 3586, 2244, 2266, 7128	3590	28	16396	3.26224	0.00201371	1.11354e-05	1.0309e-05
GOTERM_CC_DIRECT	GO:0005901~caveola	33	0.884008	2.6245e-07	23209, 6331, 3162, 6608, 3717, 476, 2149, 356, 659, 857, 10013, 10211, 4842, 858, 859, 4846, 5594, 5595, 6401, 3991, 3055, 481, 64805, 1201, 6513, 5743, 3643, 3667, 1946, 6714, 2319, 949, 5727	3662	65	17735	2.45874	0.000296	1.02084e-05	9.35769e-06
GOTERM_MF_DIRECT	GO:0031625~ubiquitin protein ligase binding	100	2.67881	2.68038e-07	7167, 4055, 9063, 2821, 596, 10891, 10013, 637, 10376, 9978, 3757, 3093, 3091, 5430, 22926, 4067, 266740, 7852, 1191, 84557, 11078, 7329, 1629, 408, 409, 7187, 9641, 7341, 4591, 7189, 7188, 7345, 6497, 8678, 8554, 8313, 9482, 4193, 57761, 100287171, 81631, 811, 7855, 4087, 4088, 5970, 340061, 7874, 9099, 81502, 3304, 3303, 57379, 5566, 5567, 3309, 8453, 9025, 5460, 6790, 8452, 8975, 7520, 25820, …	3557	287	16472	1.61354	0.000667728	1.75847e-05	1.67665e-05
GOTERM_BP_DIRECT	GO:0042542~response to hydrogen peroxide	29	0.776855	2.74302e-07	8013, 4151, 6770, 6772, 3043, 3240, 3162, 374, 596, 3039, 3939, 578, 5159, 6647, 836, 6648, 8061, 2185, 23411, 2281, 6382, 3329, 100, 1843, 2876, 10628, 847, 6714, 3725	3590	51	16396	2.597	0.00228561	1.25712e-05	1.16383e-05
GOTERM_CC_DIRECT	GO:0010008~endosome membrane	69	1.84838	2.86877e-07	909, 11021, 23643, 55240, 3119, 3117, 3916, 51284, 3115, 10938, 3113, 910, 7316, 51324, 911, 912, 7879, 10058, 10454, 5979, 7099, 7098, 219931, 57192, 7251, 29110, 79720, 24141, 51135, 55697, 150684, 51257, 3643, 968, 5868, 4615, 929, 9641, 7189, 8678, 9445, 6532, 23621, 23545, 6293, 148022, 4948, 535, 338, 7018, 3654, 10312, 3656, 1956, 4360, 7311, 9896, 2064, 200576, 4915, 3949, 53373, 51311, 5…	3662	185	17735	1.8063	0.000323545	1.07866e-05	9.8877e-06
GOTERM_BP_DIRECT	GO:0001649~osteoblast differentiation	47	1.25904	2.93435e-07	2091, 9188, 6696, 5245, 10492, 2254, 3486, 1660, 121340, 3021, 338773, 9241, 2194, 3183, 3381, 6591, 7481, 55366, 650, 6608, 652, 58476, 632, 2662, 6348, 4763, 6209, 4208, 89780, 7291, 1591, 7290, 3295, 3371, 1291, 3491, 3726, 103, 51176, 9902, 207, 30812, 6657, 847, 1969, 6615, 2736	3590	104	16396	2.06399	0.00244484	1.33746e-05	1.2382e-05
GOTERM_BP_DIRECT	GO:0007507~heart development	71	1.90196	3.38289e-07	5020, 6196, 7046, 5781, 5066, 5463, 5465, 2033, 7040, 7042, 472, 2625, 84525, 2624, 2623, 2302, 2300, 4763, 55803, 6901, 4208, 5591, 7010, 5155, 5111, 5310, 5311, 1909, 7137, 1396, 161882, 23054, 6678, 5467, 4851, 7249, 5468, 1906, 4776, 3764, 6717, 4151, 23509, 130497, 5125, 2296, 1281, 8195, 133, 650, 2200, 8828, 6648, 165904, 9734, 5894, 2066, 3397, 2064, 187, 5728, 1767, 1525, 7029, 83881, 68…	3590	183	16396	1.77195	0.00281803	1.53352e-05	1.41971e-05
GOTERM_BP_DIRECT	GO:0070527~platelet aggregation	25	0.669703	3.937e-07	5341, 4352, 7301, 3043, 2623, 3315, 3611, 2621, 2244, 2266, 3674, 71, 5777, 4627, 89780, 3690, 5156, 2243, 64805, 2778, 2811, 55330, 6812, 60, 87	3590	41	16396	2.78484	0.00327886	1.77506e-05	1.64333e-05
GOTERM_BP_DIRECT	GO:0043552~positive regulation of phosphatidylinositol 3-kinase activity	21	0.56255	4.04285e-07	7010, 5155, 6366, 4067, 5156, 2066, 64127, 2185, 7040, 22863, 3815, 1236, 2247, 2322, 2321, 998, 5159, 3667, 5747, 5879, 6714	3590	31	16396	3.09386	0.00336686	1.80822e-05	1.67403e-05
GOTERM_BP_DIRECT	GO:0071560~cellular response to transforming growth factor beta stimulus	28	0.750067	4.05391e-07	50507, 7046, 7123, 6375, 25, 6770, 8576, 1284, 3066, 7040, 8692, 4092, 80326, 2200, 10891, 317, 857, 6625, 10631, 4208, 6660, 7474, 6662, 383, 1524, 2534, 1906, 3987	3590	49	16396	2.60979	0.00337606	1.80822e-05	1.67403e-05
GOTERM_MF_DIRECT	GO:0001085~RNA polymerase II transcription factor binding	27	0.723279	4.50338e-07	4772, 1660, 3065, 23028, 2625, 2624, 2623, 1499, 2002, 6688, 9219, 2627, 2626, 7494, 7157, 4089, 6862, 9314, 23013, 161882, 145258, 2932, 367, 468, 1387, 83881, 140628	3557	47	16472	2.66029	0.00112161	2.81471e-05	2.68374e-05
GOTERM_MF_DIRECT	GO:0032041~NAD-dependent histone deacetylase activity (H3-K14 specific)	12	0.321457	4.51617e-07	79885, 83933, 9734, 51564, 8841, 55869, 9759, 23410, 3066, 10013, 3065, 10014	3557	12	16472	4.63087	0.0011248	2.81471e-05	2.68374e-05
GOTERM_BP_DIRECT	GO:0043434~response to peptide hormone	26	0.696491	4.96232e-07	5020, 7442, 6772, 2770, 3087, 374, 673, 655, 2069, 4747, 8805, 4041, 7010, 7076, 6387, 1490, 682, 3727, 1027, 488, 301, 2695, 6678, 3667, 1605, 1604	3590	44	16396	2.69876	0.00413101	2.20163e-05	2.03825e-05
GOTERM_CC_DIRECT	GO:0005769~early endosome	79	2.11626	5.21061e-07	9146, 9100, 23209, 9101, 8650, 4771, 8411, 5861, 26119, 3482, 2150, 153, 27329, 154, 2149, 1730, 10938, 92737, 10211, 913, 255738, 5979, 4924, 7098, 5594, 5595, 9711, 7852, 7412, 149466, 2042, 7251, 3329, 5906, 26047, 920, 150684, 208, 5987, 2837, 5868, 1080, 8673, 5245, 8153, 9482, 57007, 1238, 84868, 335, 100287171, 336, 338, 7018, 55823, 5878, 5119, 8829, 3791, 10163, 9897, 3077, 9372, 4914, 2…	3662	224	17735	1.70802	0.000587585	1.89599e-05	1.73799e-05
GOTERM_BP_DIRECT	GO:0032727~positive regulation of interferon-alpha production	12	0.321457	5.2428e-07	3329, 7099, 29110, 64135, 3661, 3146, 3663, 3665, 23586, 56829, 8767, 57506	3590	12	16396	4.56713	0.004364	2.30159e-05	2.13079e-05
GOTERM_BP_DIRECT	GO:0001774~microglial cell activation	12	0.321457	5.2428e-07	199, 7442, 51284, 566, 3565, 51311, 3596, 6622, 10333, 7097, 1191, 3725	3590	12	16396	4.56713	0.004364	2.30159e-05	2.13079e-05
GOTERM_BP_DIRECT	GO:0001837~epithelial to mesenchymal transition	22	0.589338	6.03695e-07	3082, 7046, 3091, 6275, 7474, 6662, 2263, 8091, 7040, 9241, 7042, 6591, 7481, 650, 2932, 1499, 51176, 655, 4851, 10155, 3987, 6615	3590	34	16396	2.9552	0.00502336	2.63634e-05	2.4407e-05
GOTERM_BP_DIRECT	GO:0001892~embryonic placenta development	16	0.42861	6.14061e-07	6670, 7274, 3091, 5155, 5310, 5311, 2034, 3297, 1051, 1050, 1437, 2624, 4838, 7942, 5469, 1956	3590	20	16396	3.6537	0.0051094	2.66765e-05	2.46968e-05
GOTERM_CC_DIRECT	GO:0005768~endosome	79	2.11626	6.38142e-07	9146, 5063, 25825, 7046, 23209, 3482, 7042, 351, 154, 552, 1017, 51284, 476, 554, 115123, 51761, 999, 10211, 6503, 10058, 9619, 4803, 7251, 5590, 79720, 1027, 3600, 79689, 120892, 55016, 10188, 5987, 5868, 2319, 1901, 7187, 4074, 8678, 4035, 9402, 4036, 2694, 23621, 220972, 9482, 27065, 6609, 57007, 410, 412, 1234, 2642, 2321, 6249, 5798, 55823, 857, 1956, 1636, 7430, 4043, 5298, 3791, 160851, 70…	3662	225	17735	1.70042	0.000719565	2.24945e-05	2.062e-05
GOTERM_MF_DIRECT	GO:0030246~carbohydrate binding	73	1.95553	6.43227e-07	158326, 653509, 7123, 22914, 5068, 8972, 6675, 2548, 3958, 5818, 3558, 10219, 26232, 55600, 23284, 1178, 10332, 6900, 170482, 9993, 6441, 6320, 5310, 729238, 3848, 2632, 202, 325, 721, 2673, 9902, 10462, 4973, 8778, 3963, 969, 3964, 3965, 89790, 9761, 4153, 9563, 6652, 161198, 23426, 29121, 10956, 1116, 6403, 811, 6402, 933, 51348, 283420, 2208, 27181, 64581, 27159, 59271, 338339, 27036, 821, 308…	3557	195	16472	1.73361	0.00160164	3.82484e-05	3.64687e-05
GOTERM_MF_DIRECT	GO:0004866~endopeptidase inhibitor activity	23	0.616126	6.44378e-07	8530, 7035, 5266, 5345, 1471, 6690, 197, 9097, 6590, 2, 10406, 27344, 1476, 720, 721, 831, 5973, 4018, 3699, 3700, 727, 718, 5627	3557	37	16472	2.87865	0.0016045	3.82484e-05	3.64687e-05
GOTERM_CC_DIRECT	GO:0071556~integral component of lumenal side of endoplasmic reticulum membrane	19	0.508974	6.78577e-07	6892, 5311, 3123, 3133, 121665, 3119, 3107, 81502, 3106, 3117, 3105, 972, 3115, 3126, 3125, 3113, 821, 3135, 811	3662	28	17735	3.28631	0.000765142	2.3195e-05	2.12621e-05
GOTERM_BP_DIRECT	GO:0035729~cellular response to hepatocyte growth factor stimulus	13	0.348245	6.92307e-07	3082, 9564, 22933, 5970, 1385, 2932, 3569, 2730, 3586, 5469, 2729, 7429, 8829	3590	14	16396	4.24091	0.00575858	2.99199e-05	2.76995e-05
GOTERM_BP_DIRECT	GO:0007157~heterophilic cell-cell adhesion via plasma membrane cell adhesion molecules	28	0.750067	6.97798e-07	23705, 5068, 3683, 81607, 1000, 22871, 57463, 3383, 201633, 5817, 5818, 5819, 214, 6403, 4345, 10178, 3678, 9378, 6401, 7412, 259197, 1525, 1002, 30835, 347902, 923, 3963, 10666	3590	50	16396	2.55759	0.00580412	2.99694e-05	2.77454e-05
GOTERM_BP_DIRECT	GO:0033280~response to vitamin D	15	0.401822	7.00641e-07	219931, 6781, 6696, 5741, 1594, 1032, 1591, 7040, 360, 632, 655, 920, 5743, 3627, 7706	3590	18	16396	3.80594	0.0058277	2.99694e-05	2.77454e-05
GOTERM_MF_DIRECT	GO:0008236~serine-type peptidase activity	32	0.857219	7.28048e-07	5340, 9622, 3002, 3083, 8909, 354, 1215, 1675, 5655, 6768, 715, 5657, 5550, 5650, 7113, 25818, 5652, 43849, 9372, 10942, 400668, 3249, 28983, 3004, 55554, 3003, 11012, 5644, 5547, 1804, 1803, 5649	3557	62	16472	2.39013	0.00181265	4.12505e-05	3.93311e-05
GOTERM_MF_DIRECT	GO:0046934~phosphatidylinositol-4,5-bisphosphate 3-kinase activity	32	0.857219	7.28048e-07	9365, 5781, 4254, 2254, 2252, 3084, 3815, 2249, 2247, 1950, 2246, 2069, 930, 5159, 3932, 1956, 5295, 5154, 5155, 5156, 2066, 2263, 2064, 5290, 2260, 5293, 2534, 940, 941, 2255, 942, 3667	3557	62	16472	2.39013	0.00181265	4.12505e-05	3.93311e-05
GOTERM_BP_DIRECT	GO:0030324~lung development	37	0.99116	7.48829e-07	6670, 3280, 6493, 7422, 7080, 2034, 2033, 7917, 1116, 2247, 2246, 4323, 10630, 10454, 3911, 1956, 4846, 1978, 1977, 7474, 4087, 6720, 5499, 2263, 1392, 1490, 1050, 383, 1544, 3146, 6678, 4851, 7547, 4613, 8914, 9509, 2736	3590	76	16396	2.22347	0.00622726	3.18607e-05	2.94962e-05
GOTERM_BP_DIRECT	GO:0006979~response to oxidative stress	48	1.28583	7.52494e-07	50506, 25, 7001, 4153, 4353, 5663, 7226, 1161, 3163, 3162, 25824, 351, 3417, 6927, 1137, 4323, 11168, 2729, 1956, 8288, 6188, 4025, 2067, 23411, 114757, 5071, 7173, 2878, 3848, 11019, 1843, 761, 2876, 1861, 2730, 1244, 120892, 348, 6414, 5742, 6898, 5621, 7349, 207, 5743, 4512, 4710, 2937	3590	110	16396	1.99293	0.00625765	3.18607e-05	2.94962e-05
GOTERM_BP_DIRECT	GO:0031069~hair follicle morphogenesis	19	0.508974	7.57058e-07	25928, 2252, 2263, 7042, 7053, 6608, 596, 27152, 80326, 1499, 2255, 3872, 998, 8626, 4851, 342574, 538, 84283, 6615	3590	27	16396	3.21391	0.00629548	3.1892e-05	2.95252e-05
GOTERM_MF_DIRECT	GO:0004674~protein serine/threonine kinase activity	122	3.26815	8.04292e-07	6196, 7046, 6872, 23049, 6195, 472, 1613, 1459, 1457, 127933, 1453, 8767, 1859, 8408, 9475, 4342, 1195, 51135, 4217, 30811, 22858, 5562, 5563, 4751, 6093, 55589, 3654, 815, 3656, 818, 6300, 5058, 3551, 2580, 5290, 5292, 5608, 10769, 10922, 545, 5566, 5567, 5600, 8558, 4117, 8317, 7867, 5603, 11213, 5604, 5606, 5063, 5580, 6790, 5581, 6793, 6792, 5583, 6794, 8576, 5587, 1022, 1020, 9261, 9020, 506…	3557	375	16472	1.50658	0.00200229	4.45578e-05	4.24845e-05
GOTERM_BP_DIRECT	GO:2001240~negative regulation of extrinsic apoptotic signaling pathway in absence of ligand	23	0.616126	8.2875e-07	5196, 7015, 6376, 7124, 3552, 3574, 4170, 3084, 6591, 2537, 1437, 2668, 1524, 596, 2623, 2534, 3304, 3303, 598, 3553, 2255, 8737, 207	3590	37	16396	2.83903	0.00688959	3.47367e-05	3.21588e-05
GOTERM_BP_DIRECT	GO:0046677~response to antibiotic	21	0.56255	8.55818e-07	4261, 26, 7157, 3397, 3320, 7390, 3373, 8372, 8692, 4193, 3716, 3717, 3569, 1543, 841, 842, 1233, 6347, 6647, 836, 8639	3590	32	16396	2.99718	0.00711381	3.56919e-05	3.30431e-05
GOTERM_MF_DIRECT	GO:0004175~endopeptidase activity	29	0.776855	9.66754e-07	9986, 5045, 5046, 5663, 4179, 4311, 5664, 29843, 354, 1512, 1215, 1991, 834, 1636, 9476, 64167, 4321, 1373, 59272, 5707, 5708, 102, 2158, 26168, 4312, 51752, 4314, 4318, 1889	3557	54	16472	2.48695	0.00240625	5.23939e-05	4.9956e-05
GOTERM_BP_DIRECT	GO:0048013~ephrin receptor signaling pathway	40	1.07152	1.0629e-06	5063, 5781, 10095, 8997, 8851, 5664, 2051, 6093, 2048, 1398, 998, 71, 2904, 5879, 2902, 285220, 6383, 6386, 9475, 4067, 5058, 1173, 2042, 2041, 4914, 1942, 387, 102, 2534, 23294, 4313, 60, 1948, 5921, 1947, 1969, 1946, 5747, 6714, 4318	3590	86	16396	2.12425	0.00882753	4.40542e-05	4.07849e-05
GOTERM_BP_DIRECT	GO:0043280~positive regulation of cysteine-type endopeptidase activity involved in apoptotic process	24	0.642915	1.06689e-06	22900, 89780, 8743, 7124, 5366, 29108, 3297, 23411, 1490, 114548, 3491, 10018, 4838, 4609, 2149, 1654, 2852, 55655, 3146, 51024, 668, 408, 4217, 8915	3590	40	16396	2.74028	0.00886053	4.40542e-05	4.07849e-05
GOTERM_MF_DIRECT	GO:0019903~protein phosphatase binding	32	0.857219	1.13813e-06	6098, 7187, 9961, 4233, 8631, 4751, 6774, 1000, 3320, 7184, 3716, 1436, 3718, 1499, 1432, 634, 7415, 3932, 1956, 5295, 8546, 7157, 3672, 2064, 9451, 5609, 1027, 1003, 5468, 51433, 6778, 4217	3557	63	16472	2.35219	0.0028322	6.03693e-05	5.75603e-05
GOTERM_BP_DIRECT	GO:2000379~positive regulation of reactive oxygen species metabolic process	20	0.535762	1.20551e-06	50507, 7057, 4780, 5155, 7498, 7157, 59272, 183, 185, 2147, 1432, 5159, 8737, 3952, 11035, 730249, 706, 948, 4835, 1647	3590	30	16396	3.04475	0.010006	4.92902e-05	4.56323e-05
GOTERM_BP_DIRECT	GO:0032480~negative regulation of type I interferon production	20	0.535762	1.20551e-06	9641, 7187, 9246, 64135, 7311, 3661, 23586, 51191, 83737, 79671, 79132, 29110, 84166, 7316, 7128, 9636, 7318, 730249, 57506, 7706	3590	30	16396	3.04475	0.010006	4.92902e-05	4.56323e-05
GOTERM_BP_DIRECT	GO:0008015~blood circulation	25	0.669703	1.30598e-06	5540, 6772, 2056, 3363, 2153, 133, 552, 135, 1874, 2006, 710, 4524, 719, 6387, 54567, 2035, 624, 4973, 4852, 55636, 4018, 4778, 2837, 11138, 3627	3590	43	16396	2.65531	0.0108354	5.31376e-05	4.91942e-05
GOTERM_MF_DIRECT	GO:0020037~heme binding	54	1.44656	1.33804e-06	50507, 4051, 50506, 1583, 1581, 3043, 3163, 3042, 6391, 3162, 1536, 3717, 10857, 1576, 3039, 4842, 4843, 120227, 10058, 4846, 4025, 1594, 1591, 7173, 3050, 6916, 1545, 1544, 1588, 1543, 3048, 1584, 5742, 5743, 6999, 54205, 847, 6714, 1548, 4151, 4353, 1558, 1557, 1555, 3818, 259, 1559, 8288, 114757, 4519, 1565, 3620, 4512, 50865	3557	133	16472	1.8802	0.00332885	6.94946e-05	6.6261e-05
GOTERM_BP_DIRECT	GO:0050679~positive regulation of epithelial cell proliferation	31	0.830431	1.49115e-06	8013, 6331, 6352, 7422, 130497, 2254, 2252, 391104, 7040, 9241, 6608, 4609, 652, 3479, 2246, 1956, 5076, 6662, 7039, 3397, 64127, 2263, 7291, 2064, 3373, 4838, 3569, 2255, 4851, 6899, 728	3590	60	16396	2.35968	0.0123622	6.00856e-05	5.56265e-05
GOTERM_BP_DIRECT	GO:0007249~I-kappaB kinase/NF-kappaB signaling	31	0.830431	1.49115e-06	929, 7189, 4790, 4791, 7124, 23643, 6093, 148022, 9020, 330, 695, 554, 7316, 8767, 3656, 10454, 7132, 7099, 7098, 9475, 7311, 5971, 3551, 29110, 1147, 51311, 602, 8517, 8737, 11035, 8915	3590	60	16396	2.35968	0.0123622	6.00856e-05	5.56265e-05
GOTERM_CC_DIRECT	GO:0016605~PML body	42	1.1251	1.50128e-06	6670, 9641, 7341, 6497, 90523, 8554, 81603, 9063, 1613, 58476, 10891, 6427, 5371, 4261, 7750, 7015, 4683, 266740, 7157, 7874, 2000, 3297, 23411, 7290, 5728, 1025, 545, 2872, 546, 2475, 6117, 406, 7329, 5888, 6613, 5987, 8878, 4778, 7704, 3646, 3669, 5925	3662	98	17735	2.07556	0.00169201	4.98073e-05	4.56567e-05
GOTERM_BP_DIRECT	GO:0042157~lipoprotein metabolic process	23	0.616126	1.56134e-06	8542, 4035, 5465, 19, 6382, 341, 29881, 213, 345, 335, 81575, 336, 348, 338, 5566, 5567, 649, 4018, 255738, 3931, 55937, 949, 9619	3590	38	16396	2.76432	0.0129403	6.23118e-05	5.76875e-05
GOTERM_BP_DIRECT	GO:2001237~negative regulation of extrinsic apoptotic signaling pathway	23	0.616126	1.56134e-06	7046, 7057, 6198, 4000, 8996, 5970, 29949, 259230, 3958, 652, 367, 3479, 2730, 3565, 3685, 8737, 10197, 3655, 2729, 6714, 8829, 8837, 10413	3590	38	16396	2.76432	0.0129403	6.23118e-05	5.76875e-05
GOTERM_CC_DIRECT	GO:0005667~transcription factor complex	69	1.84838	1.69371e-06	8013, 5460, 6872, 7080, 2353, 2034, 2033, 3164, 7161, 4092, 196, 2625, 1019, 2624, 2623, 1017, 1499, 4005, 56938, 9219, 51008, 10413, 2627, 10456, 5591, 55809, 3091, 5991, 64321, 161882, 1390, 3726, 145258, 3727, 10625, 51176, 23054, 328, 406, 4776, 7528, 3725, 6495, 6497, 7027, 23028, 6928, 6927, 5916, 1874, 1871, 84864, 1870, 8626, 10432, 6925, 9575, 4087, 4088, 9734, 5970, 4089, 142, 10524, 14…	3662	193	17735	1.73143	0.00190868	5.45859e-05	5.00371e-05
GOTERM_BP_DIRECT	GO:0042346~positive regulation of NF-kappaB import into nucleus	16	0.42861	1.71182e-06	7099, 7098, 7124, 7097, 387, 1896, 8809, 51284, 56892, 51561, 3553, 26585, 5743, 54106, 3965, 3606	3590	21	16396	3.47972	0.0141785	6.73504e-05	6.23523e-05
GOTERM_BP_DIRECT	GO:0032094~response to food	16	0.42861	1.71182e-06	5020, 4353, 6720, 2693, 1373, 2691, 2690, 1139, 1543, 2520, 89832, 207, 4988, 2539, 2538, 8915	3590	21	16396	3.47972	0.0141785	6.73504e-05	6.23523e-05
GOTERM_BP_DIRECT	GO:0019835~cytolysis	16	0.42861	1.71182e-06	8542, 5551, 4069, 100507436, 3002, 3001, 3251, 79792, 730, 731, 578, 732, 3004, 5027, 727, 729	3590	21	16396	3.47972	0.0141785	6.73504e-05	6.23523e-05
GOTERM_BP_DIRECT	GO:0014070~response to organic cyclic compound	27	0.723279	1.74695e-06	2052, 54790, 3383, 6928, 1910, 310, 578, 4323, 10257, 32, 2180, 5430, 9536, 4067, 38, 4288, 9775, 3992, 285, 1543, 268, 466, 983, 3565, 2695, 9308, 2539	3590	49	16396	2.51658	0.0144674	6.84099e-05	6.33331e-05
GOTERM_BP_DIRECT	GO:0031623~receptor internalization	24	0.642915	1.92708e-06	7430, 6850, 7037, 8301, 2690, 26119, 133, 57007, 3579, 10859, 796, 3577, 3576, 975, 799, 6622, 6900, 857, 3688, 3689, 948, 409, 928, 43	3590	41	16396	2.67344	0.0159472	7.51112e-05	6.9537e-05
GOTERM_BP_DIRECT	GO:0043536~positive regulation of blood vessel endothelial cell migration	15	0.401822	2.12261e-06	7057, 4780, 5155, 7422, 7424, 5587, 7040, 284, 3315, 2247, 1432, 5578, 207, 51378, 6776	3590	19	16396	3.60563	0.017551	8.23475e-05	7.62364e-05
GOTERM_CC_DIRECT	GO:0005719~nuclear euchromatin	18	0.482186	2.13763e-06	5430, 9314, 1385, 3024, 23411, 6908, 3007, 1499, 3006, 440093, 3005, 10891, 8846, 10155, 6932, 9739, 8805, 3725	3662	27	17735	3.22865	0.00240835	6.5169e-05	5.97382e-05
GOTERM_CC_DIRECT	GO:0008305~integrin complex	18	0.482186	2.13763e-06	3690, 3680, 3682, 3683, 3694, 3672, 3684, 3685, 3696, 3674, 3687, 3676, 3655, 3688, 3689, 3678, 3679, 4627	3662	27	17735	3.22865	0.00240835	6.5169e-05	5.97382e-05
GOTERM_BP_DIRECT	GO:0002003~angiotensin maturation	11	0.294669	2.20475e-06	1359, 1215, 1522, 1511, 2028, 5972, 4311, 183, 59272, 1636, 10159	3590	11	16396	4.56713	0.018224	8.51382e-05	7.882e-05
GOTERM_CC_DIRECT	GO:0005796~Golgi lumen	41	1.09831	2.26936e-06	94025, 5045, 5046, 5125, 2331, 7040, 1081, 143662, 1634, 2621, 2147, 632, 1673, 1672, 4323, 9957, 3630, 3972, 4803, 6383, 89780, 394263, 4582, 7474, 4583, 4320, 4585, 4586, 1671, 1670, 181, 727897, 6382, 1668, 55894, 2159, 2158, 2817, 5624, 5627, 1669	3662	96	17735	2.06836	0.00255657	6.73641e-05	6.17504e-05
GOTERM_BP_DIRECT	GO:0016525~negative regulation of angiogenesis	31	0.830431	2.32224e-06	112744, 6772, 1284, 2296, 3087, 6093, 350, 1634, 354, 356, 4763, 6347, 11005, 6925, 5371, 5196, 7010, 7057, 9475, 729230, 183, 7075, 285, 2833, 1524, 6678, 51378, 1969, 641700, 4879, 3627	3590	61	16396	2.321	0.0191857	8.92616e-05	8.26373e-05
GOTERM_BP_DIRECT	GO:0032869~cellular response to insulin stimulus	36	0.964372	2.41468e-06	6430, 6770, 5167, 6772, 2693, 2690, 353, 4609, 57761, 634, 5313, 6347, 339, 6548, 2729, 2805, 255738, 10014, 5319, 5591, 7494, 5295, 9734, 5058, 5872, 9370, 142, 2931, 207, 5468, 208, 3643, 3667, 6517, 4218, 6714	3590	76	16396	2.16338	0.0199418	9.23893e-05	8.55329e-05
GOTERM_BP_DIRECT	GO:2000778~positive regulation of interleukin-6 secretion	14	0.375033	2.5097e-06	7494, 112744, 5047, 59341, 29108, 7291, 2150, 8692, 3329, 2149, 3553, 3146, 3965, 3605	3590	17	16396	3.76117	0.0207183	9.55862e-05	8.84926e-05
GOTERM_BP_DIRECT	GO:0016477~cell migration	65	1.74123	2.52918e-06	3280, 8452, 6198, 5420, 5861, 2078, 7040, 2195, 7042, 3716, 3717, 3718, 2028, 2621, 634, 10297, 6548, 6624, 3911, 7297, 7057, 3690, 5792, 4145, 5796, 2042, 283, 5590, 1942, 324, 30011, 83666, 3685, 10188, 3688, 1901, 9564, 25, 5364, 27, 1000, 2296, 63923, 79834, 2321, 55704, 5159, 136242, 977, 6383, 2066, 2022, 3592, 23237, 1490, 2260, 6382, 5728, 2932, 387, 2534, 983, 623, 1969, 6615	3590	171	16396	1.73604	0.0208775	9.58905e-05	8.87743e-05
GOTERM_BP_DIRECT	GO:2000484~positive regulation of interleukin-8 secretion	12	0.321457	2.72683e-06	2867, 7474, 2149, 820, 965, 29108, 51744, 914, 8692, 2150, 3965, 2219	3590	13	16396	4.21581	0.0224904	0.000101993	9.4424e-05
GOTERM_BP_DIRECT	GO:0001878~response to yeast	12	0.321457	2.72683e-06	133, 3569, 796, 4353, 7432, 820, 6863, 1991, 942, 4852, 283, 351	3590	13	16396	4.21581	0.0224904	0.000101993	9.4424e-05
GOTERM_BP_DIRECT	GO:0048246~macrophage chemotaxis	12	0.321457	2.72683e-06	1910, 1524, 3958, 6441, 6352, 6288, 566, 6376, 6348, 79902, 6347, 51192	3590	13	16396	4.21581	0.0224904	0.000101993	9.4424e-05
GOTERM_BP_DIRECT	GO:0007050~cell cycle arrest	56	1.50013	2.94317e-06	8453, 7046, 8452, 6794, 7248, 1022, 1021, 7040, 7161, 7042, 472, 4609, 127933, 2621, 2081, 7057, 5310, 5311, 1033, 1032, 1030, 7251, 1029, 1028, 1027, 324, 2475, 5621, 7249, 25, 5562, 5563, 5564, 3458, 3611, 57521, 3576, 811, 3659, 5371, 6300, 4088, 4683, 7157, 3592, 81617, 5608, 3624, 3623, 3664, 6657, 4436, 5604, 1649, 5925, 1647	3590	141	16396	1.8139	0.024253	0.000109594	0.000101461
GOTERM_BP_DIRECT	GO:0070371~ERK1 and ERK2 cascade	17	0.455398	3.187e-06	5594, 5595, 6662, 6356, 183, 551, 1512, 3479, 1950, 335, 2255, 3685, 128239, 5469, 5734, 5604, 3965	3590	24	16396	3.23505	0.0262357	0.000118146	0.000109378
GOTERM_BP_DIRECT	GO:0006974~cellular response to DNA damage stimulus	75	2.00911	3.20326e-06	9025, 9100, 84083, 6872, 23409, 6794, 5663, 4332, 3364, 7161, 9261, 472, 56852, 672, 595, 10538, 596, 4609, 51366, 80169, 55367, 5930, 5810, 10413, 5594, 9557, 5595, 4067, 4221, 57551, 23411, 324, 23054, 842, 1386, 602, 207, 604, 7528, 7189, 25, 3661, 5366, 5884, 1161, 55388, 28992, 10519, 3014, 26574, 8626, 7415, 6446, 79915, 140733, 22944, 7153, 5252, 6188, 7157, 9577, 100507436, 23476, 1493, 1…	3590	207	16396	1.65476	0.0263678	0.000118223	0.000109449
GOTERM_CC_DIRECT	GO:0005634~nucleus	1215	32.5475	3.27443e-06	9188, 8091, 259266, 1459, 2305, 10656, 56655, 6908, 1457, 10658, 6907, 2302, 56892, 54478, 2300, 1453, 253959, 57509, 10891, 5810, 6901, 10413, 126961, 22882, 145258, 1468, 2312, 57510, 801, 3642, 4975, 341567, 3646, 4736, 808, 92521, 22858, 4990, 3661, 4751, 3662, 27065, 6928, 55585, 6927, 3416, 57761, 55589, 2322, 1475, 114971, 811, 30009, 3654, 814, 815, 3656, 6925, 3659, 91662, 6940, 2100, 34…	3662	5337	17735	1.10253	0.00368675	9.47065e-05	8.68143e-05
GOTERM_BP_DIRECT	GO:0007566~embryo implantation	24	0.642915	3.37856e-06	6781, 6696, 6256, 7356, 4485, 6159, 5125, 2056, 1471, 3021, 3490, 682, 55585, 796, 126206, 3553, 5467, 5743, 4313, 6647, 10155, 730249, 3976, 4318	3590	42	16396	2.60979	0.0277905	0.000124144	0.000114931
GOTERM_BP_DIRECT	GO:0007219~Notch signaling pathway	48	1.28583	3.39761e-06	3280, 8431, 23509, 3880, 5663, 9148, 5664, 28514, 2033, 1021, 2296, 3087, 7040, 6591, 351, 29924, 6928, 650, 3559, 4609, 23462, 92737, 7316, 8626, 2805, 6868, 3714, 2208, 6223, 6662, 7311, 23013, 182, 83737, 1050, 55273, 57534, 189, 1027, 84934, 102, 54567, 3169, 1387, 4851, 51378, 4854, 10683	3590	115	16396	1.90628	0.027945	0.000124296	0.000115072
GOTERM_BP_DIRECT	GO:0001889~liver development	35	0.937584	3.57291e-06	3082, 6670, 3280, 23705, 3142, 3482, 570, 6927, 11309, 4763, 54658, 5315, 255738, 6648, 2627, 5914, 7494, 34, 4088, 5970, 38, 5310, 5311, 5290, 1050, 383, 100, 4838, 2356, 4851, 5469, 5009, 1628, 3845, 3725	3590	74	16396	2.16013	0.0293655	0.000129639	0.000120018
GOTERM_BP_DIRECT	GO:0007229~integrin-mediated signaling pathway	43	1.15189	3.57474e-06	9564, 8452, 5781, 5341, 3680, 6850, 3682, 3683, 5587, 3684, 1281, 3381, 27329, 3611, 335, 634, 3674, 3696, 3676, 3655, 3678, 3679, 27040, 3911, 4627, 3690, 11093, 5354, 3672, 3694, 3055, 2185, 1490, 7294, 2515, 102, 961, 3685, 3687, 3688, 3689, 5747, 6714	3590	99	16396	1.9837	0.0293803	0.000129639	0.000120018
GOTERM_CC_DIRECT	GO:0042101~T cell receptor complex	14	0.375033	3.61494e-06	919, 6850, 8631, 214, 920, 634, 7535, 923, 925, 915, 926, 916, 8915, 917	3662	18	17735	3.76676	0.00406936	0.000101442	9.29882e-05
GOTERM_BP_DIRECT	GO:0035019~somatic stem cell population maintenance	32	0.857219	3.6183e-06	3280, 5460, 5441, 6497, 6774, 2034, 8091, 9241, 2624, 3815, 673, 2247, 57167, 6688, 10413, 4041, 4087, 5430, 6662, 5431, 4089, 5894, 9314, 22882, 2041, 55211, 2255, 1045, 7547, 79923, 6657, 6659	3590	65	16396	2.24843	0.029733	0.000130651	0.000120955
GOTERM_CC_DIRECT	GO:1903561~extracellular vesicle	26	0.696491	3.68715e-06	2153, 476, 873, 335, 732, 2244, 5611, 5315, 6528, 10015, 4240, 6386, 7037, 8722, 4245, 10085, 2243, 2782, 1293, 1292, 481, 5270, 348, 6558, 3689, 928	3662	50	17735	2.51835	0.00415048	0.000101442	9.29882e-05
GOTERM_MF_DIRECT	GO:0005518~collagen binding	30	0.803643	3.9672e-06	7045, 3680, 4092, 1514, 1634, 1513, 5479, 51206, 1834, 7373, 7450, 5154, 5155, 131578, 4088, 7399, 4089, 5058, 3672, 4322, 114897, 960, 2335, 1520, 6678, 9902, 1508, 4811, 4318, 43	3557	60	16472	2.31543	0.00983757	0.000201841	0.00019245
GOTERM_BP_DIRECT	GO:0046427~positive regulation of JAK-STAT cascade	16	0.42861	4.28631e-06	3280, 50616, 6352, 29949, 282618, 231, 3815, 1545, 3569, 2688, 2149, 3567, 3586, 4851, 3952, 5617	3590	22	16396	3.32155	0.0351248	0.000153443	0.000142055
GOTERM_BP_DIRECT	GO:0090023~positive regulation of neutrophil chemotaxis	16	0.42861	4.28631e-06	6375, 114609, 5880, 6366, 2921, 2920, 1236, 3579, 972, 51561, 3929, 3576, 2919, 5879, 728, 719	3590	22	16396	3.32155	0.0351248	0.000153443	0.000142055
GOTERM_CC_DIRECT	GO:0043202~lysosomal lumen	37	0.99116	4.56862e-06	5641, 2694, 2331, 2990, 3320, 10437, 6609, 10855, 1514, 2548, 1634, 410, 27163, 972, 411, 2588, 2720, 356, 950, 5159, 913, 2629, 4669, 6383, 8722, 5476, 3373, 3073, 6382, 3425, 3423, 1520, 1509, 2817, 3920, 2638, 4758	3662	85	17735	2.10812	0.00514016	0.000121501	0.000111376
GOTERM_CC_DIRECT	GO:0071682~endocytic vesicle lumen	13	0.348245	4.63167e-06	6288, 3320, 3043, 3263, 3240, 7184, 117156, 3039, 335, 348, 811, 338, 6678	3662	16	17735	3.93492	0.00521092	0.000121501	0.000111376
GOTERM_BP_DIRECT	GO:0019882~antigen processing and presentation	27	0.723279	4.6612e-06	11021, 3123, 1514, 3119, 1512, 3458, 3117, 972, 3115, 3113, 3135, 10332, 5971, 100507436, 5873, 3133, 3077, 2217, 3107, 563, 3106, 3105, 1520, 3126, 3125, 30835, 925	3590	51	16396	2.41789	0.0381376	0.00016615	0.00015382
GOTERM_BP_DIRECT	GO:0045907~positive regulation of vasoconstriction	20	0.535762	4.83935e-06	25, 2243, 3274, 3383, 6916, 551, 552, 2149, 146, 554, 3269, 952, 2244, 2266, 207, 5743, 857, 2837, 6915, 1956	3590	32	16396	2.85446	0.0395659	0.000171766	0.000159019
GOTERM_BP_DIRECT	GO:0010575~positive regulation of vascular endothelial growth factor production	18	0.482186	5.00858e-06	3091, 3552, 3572, 7040, 9451, 10855, 672, 4838, 1545, 468, 3553, 5743, 727, 728, 718, 284340, 2626, 719	3590	27	16396	3.04475	0.0409208	0.000174522	0.000161571
GOTERM_BP_DIRECT	GO:0032728~positive regulation of interferon-beta production	18	0.482186	5.00858e-06	7099, 7098, 64135, 3661, 23586, 7097, 29110, 1654, 3146, 3454, 3663, 10211, 3665, 56829, 8767, 54106, 57506, 3659	3590	27	16396	3.04475	0.0409208	0.000174522	0.000161571
GOTERM_BP_DIRECT	GO:0051281~positive regulation of release of sequestered calcium ion into cytosol	18	0.482186	5.00858e-06	6373, 4283, 6375, 9002, 25, 3596, 7070, 581, 2833, 2149, 2852, 2147, 930, 623, 6622, 4923, 6717, 3627	3590	27	16396	3.04475	0.0409208	0.000174522	0.000161571
GOTERM_BP_DIRECT	GO:0015721~bile acid and bile salt transport	18	0.482186	5.00858e-06	6256, 6555, 6554, 347051, 8273, 2172, 10998, 1645, 6927, 201780, 213, 11309, 28234, 634, 8647, 10499, 1109, 10599	3590	27	16396	3.04475	0.0409208	0.000174522	0.000161571
GOTERM_BP_DIRECT	GO:0014066~regulation of phosphatidylinositol 3-kinase signaling	36	0.964372	5.02162e-06	9365, 5781, 4254, 2254, 2252, 3084, 3815, 2249, 2247, 1950, 2246, 2069, 930, 634, 5159, 3932, 1956, 5295, 5594, 5154, 5595, 5155, 5156, 2066, 2263, 2064, 5290, 2260, 5293, 2534, 940, 941, 2255, 942, 207, 3667	3590	78	16396	2.10791	0.0410252	0.000174522	0.000161571
GOTERM_BP_DIRECT	GO:0031647~regulation of protein stability	33	0.884008	5.36579e-06	7341, 6790, 6871, 4771, 5587, 29108, 79594, 596, 126206, 336, 975, 998, 55869, 7018, 55823, 10013, 5714, 8805, 7494, 7375, 5594, 7015, 6720, 5476, 8841, 5071, 5728, 55278, 1029, 79589, 3920, 6659, 3845	3590	69	16396	2.18428	0.0437745	0.00018571	0.000171928
GOTERM_BP_DIRECT	GO:0008584~male gonad development	41	1.09831	5.52714e-06	8894, 7046, 6770, 7100, 4254, 2254, 2099, 8091, 2175, 259266, 3021, 7042, 2625, 10018, 3815, 596, 2623, 26471, 598, 1299, 4323, 3972, 638, 2627, 2626, 6240, 7098, 7474, 8743, 6662, 5972, 2067, 132625, 3624, 3623, 30812, 3643, 10046, 4678, 4436, 2516	3590	94	16396	1.99205	0.0450607	0.000190504	0.000176366
GOTERM_BP_DIRECT	GO:0032753~positive regulation of interleukin-4 production	15	0.401822	5.64257e-06	8288, 3133, 1051, 114548, 5590, 2625, 54440, 84868, 940, 90865, 50943, 3965, 959, 916, 5914	3590	20	16396	3.42535	0.0459798	0.000193682	0.000179308
GOTERM_MF_DIRECT	GO:0015026~coreceptor activity	19	0.508974	5.70523e-06	3690, 7852, 23643, 57007, 5818, 3547, 5819, 940, 1234, 941, 942, 920, 3685, 3676, 3688, 925, 10663, 8829, 926	3557	30	16472	2.93288	0.0141169	0.000284463	0.000271227
GOTERM_BP_DIRECT	GO:0006325~chromatin organization	24	0.642915	5.76202e-06	4342, 11240, 8841, 64710, 29943, 8091, 23411, 3065, 84939, 23569, 3009, 146059, 79885, 83933, 3621, 2146, 55869, 79813, 56916, 55746, 6657, 6877, 51702, 10014	3590	43	16396	2.5491	0.04693	0.000196971	0.000182354
GOTERM_BP_DIRECT	GO:0046854~phosphatidylinositol phosphorylation	40	1.07152	5.86148e-06	9365, 5781, 5286, 4254, 5289, 2254, 2252, 23049, 3084, 3815, 2249, 3613, 3612, 2247, 1950, 2246, 2069, 930, 5159, 3932, 1956, 5295, 5154, 5155, 5298, 5156, 2066, 2263, 2064, 5290, 2260, 200576, 5293, 2534, 940, 941, 2255, 942, 9807, 3667	3590	91	16396	2.00753	0.0477204	0.000199553	0.000184744
GOTERM_BP_DIRECT	GO:0010595~positive regulation of endothelial cell migration	25	0.669703	6.41627e-06	9564, 7422, 5587, 2625, 652, 2247, 2246, 5578, 659, 8828, 8829, 7010, 7057, 3690, 9475, 7474, 3791, 2185, 183, 284, 6678, 306, 1906, 51378, 949	3590	46	16396	2.48214	0.0521174	0.000217553	0.000201408
GOTERM_BP_DIRECT	GO:0042593~glucose homeostasis	43	1.15189	6.58572e-06	5781, 5166, 5562, 6794, 5563, 5443, 6774, 59341, 6194, 79058, 2867, 6927, 2821, 2864, 2642, 2200, 3630, 4544, 3952, 859, 51548, 3953, 5836, 57727, 3091, 9370, 1050, 3172, 169026, 4938, 3569, 1268, 3169, 1584, 207, 5468, 3643, 5547, 3667, 6517, 6659, 5727, 2538	3590	101	16396	1.94442	0.0534564	0.000222395	0.000205891
GOTERM_BP_DIRECT	GO:0044344~cellular response to fibroblast growth factor stimulus	19	0.508974	7.01961e-06	6352, 6770, 1373, 3373, 3164, 8692, 6591, 960, 4609, 54567, 1960, 2730, 3576, 6347, 6622, 2729, 6899, 10631, 10765	3590	30	16396	2.89252	0.0568763	0.000234238	0.000216855
GOTERM_BP_DIRECT	GO:0030217~T cell differentiation	19	0.508974	7.01961e-06	6670, 5293, 3815, 3558, 399, 54567, 3575, 920, 7535, 30009, 55636, 5788, 3952, 1958, 3953, 6659, 915, 3932, 3714	3590	30	16396	2.89252	0.0568763	0.000234238	0.000216855
GOTERM_BP_DIRECT	GO:0034612~response to tumor necrosis factor	17	0.455398	7.04876e-06	929, 22954, 58191, 6198, 6401, 9370, 64848, 3717, 5609, 1116, 102, 10537, 841, 8737, 5743, 836, 2937	3590	25	16396	3.10565	0.0571056	0.000234238	0.000216855
GOTERM_BP_DIRECT	GO:0051090~regulation of sequence-specific DNA binding transcription factor activity	17	0.455398	7.04876e-06	5594, 6850, 5595, 7874, 2177, 2353, 3055, 2175, 3162, 1432, 1386, 5599, 5600, 6446, 5601, 5602, 3725	3590	25	16396	3.10565	0.0571056	0.000234238	0.000216855
GOTERM_MF_DIRECT	GO:0030881~beta-2-microglobulin binding	10	0.267881	8.14466e-06	2217, 909, 3105, 100507436, 910, 3133, 911, 912, 3077, 913	3557	10	16472	4.63087	0.020092	0.00039813	0.000379605
GOTERM_MF_DIRECT	GO:0003950~NAD+ ADP-ribosyltransferase activity	18	0.482186	8.33025e-06	22933, 23408, 23409, 64761, 23410, 23411, 165631, 142, 143, 83666, 84875, 54625, 417, 56829, 8658, 51548, 80351, 10038	3557	28	16472	2.97699	0.0205451	0.000399372	0.000380789
GOTERM_BP_DIRECT	GO:0007565~female pregnancy	39	1.04474	8.54562e-06	5020, 4012, 5069, 2353, 7040, 151, 29924, 8909, 133, 596, 412, 259, 952, 53405, 3952, 139596, 5914, 5617, 7056, 4582, 7356, 8061, 3077, 1392, 183, 7372, 1723, 2778, 2796, 3620, 3565, 2695, 2354, 7349, 5744, 5228, 4878, 3965, 56848	3590	89	16396	2.00133	0.0688062	0.000282853	0.000261862
GOTERM_BP_DIRECT	GO:0019731~antibacterial humoral response	23	0.616126	8.58224e-06	7432, 6863, 4057, 6037, 1671, 1670, 3133, 2197, 283, 6590, 351, 1668, 133, 3105, 3512, 796, 820, 567, 1672, 4852, 8349, 5319, 1669	3590	41	16396	2.56205	0.0690906	0.000282942	0.000261945
GOTERM_BP_DIRECT	GO:0010744~positive regulation of macrophage derived foam cell differentiation	13	0.348245	8.84423e-06	5196, 8399, 4790, 5583, 5320, 183, 185, 1437, 1435, 338, 5601, 948, 3606	3590	16	16396	3.71079	0.071123	0.000290432	0.000268879
GOTERM_CC_DIRECT	GO:0030141~secretory granule	33	0.884008	9.03449e-06	5020, 7200, 5320, 7422, 4353, 5443, 4057, 5125, 1363, 51083, 1359, 551, 1511, 27344, 675, 255057, 1113, 1991, 3553, 998, 5798, 538, 5319, 6804, 7057, 7356, 5873, 3329, 26085, 169026, 1861, 5327, 9607	3662	74	17735	2.15971	0.0101392	0.000231611	0.00021231
GOTERM_BP_DIRECT	GO:0006928~movement of cell or subcellular component	38	1.01795	9.0491e-06	6351, 23647, 5064, 8875, 10095, 3683, 5268, 6774, 3717, 3458, 3315, 1235, 3479, 1432, 3576, 3730, 71, 10894, 5879, 7431, 4486, 3596, 7170, 7295, 2833, 2358, 29116, 643, 800, 11133, 5743, 4852, 4478, 60, 5329, 5604, 8936, 928	3590	86	16396	2.01803	0.0727091	0.000295393	0.000273472
GOTERM_BP_DIRECT	GO:0097192~extrinsic apoptotic signaling pathway in absence of ligand	20	0.535762	9.06614e-06	4254, 3552, 581, 4170, 10018, 2932, 3558, 2931, 596, 355, 597, 598, 578, 842, 3565, 2872, 3553, 3685, 836, 3934	3590	33	16396	2.76796	0.0728409	0.000295393	0.000273472
GOTERM_BP_DIRECT	GO:0019732~antifungal humoral response	10	0.267881	9.19677e-06	133, 796, 7432, 820, 4057, 6863, 4852, 283, 26525, 351	3590	10	16396	4.56713	0.0738507	0.000297327	0.000275261
GOTERM_BP_DIRECT	GO:0045080~positive regulation of chemokine biosynthetic process	10	0.267881	9.19677e-06	7098, 3458, 7474, 7124, 3565, 3553, 1958, 3162, 4615, 148022	3590	10	16396	4.56713	0.0738507	0.000297327	0.000275261
GOTERM_MF_DIRECT	GO:0000975~regulatory region DNA binding	11	0.294669	9.296e-06	4790, 861, 3661, 3662, 3663, 3664, 3665, 8091, 3394, 10379, 3659	3557	12	16472	4.24496	0.0228995	0.000437263	0.000416917
GOTERM_CC_DIRECT	GO:0005911~cell-cell junction	61	1.63407	9.59307e-06	5580, 23209, 5582, 5583, 7122, 100506658, 64115, 5587, 81607, 9260, 2195, 351, 5819, 1499, 23284, 634, 998, 5777, 10211, 6624, 914, 3678, 27040, 6868, 916, 7010, 6442, 5311, 5796, 360, 5590, 3249, 30011, 963, 5027, 6513, 207, 10223, 50848, 23705, 8631, 1000, 3815, 57449, 3611, 7535, 659, 3856, 5295, 5058, 5499, 200576, 1525, 302, 1003, 81, 128239, 3987, 3702, 7827, 87	3662	172	17735	1.71757	0.0107627	0.000240466	0.000220427
GOTERM_BP_DIRECT	GO:0048754~branching morphogenesis of an epithelial tube	16	0.42861	9.82082e-06	7422, 5310, 5058, 4233, 5499, 6928, 652, 1950, 655, 2255, 4323, 4851, 54922, 4613, 8914, 2736	3590	23	16396	3.17713	0.0786595	0.000315059	0.000291678
GOTERM_BP_DIRECT	GO:0035924~cellular response to vascular endothelial growth factor stimulus	16	0.42861	9.82082e-06	2081, 7494, 3791, 7422, 5587, 7412, 3164, 9261, 3315, 54567, 1960, 1432, 2321, 4851, 207, 8829	3590	23	16396	3.17713	0.0786595	0.000315059	0.000291678
GOTERM_BP_DIRECT	GO:0035666~TRIF-dependent toll-like receptor signaling pathway	18	0.482186	1.01453e-05	929, 9641, 7187, 7099, 7098, 7311, 3661, 3551, 23643, 148022, 330, 29110, 1147, 841, 7316, 8737, 8517, 3665	3590	28	16396	2.93601	0.0811502	0.000324222	0.000300161
GOTERM_BP_DIRECT	GO:0030194~positive regulation of blood coagulation	12	0.321457	1.01867e-05	10855, 7057, 5054, 2149, 2039, 4780, 2147, 2161, 948, 6280, 6915, 350	3590	14	16396	3.91468	0.0814676	0.000324303	0.000300236
GOTERM_BP_DIRECT	GO:0051781~positive regulation of cell division	25	0.669703	1.03988e-05	22933, 7422, 7424, 7423, 2254, 2252, 7040, 3481, 7042, 2249, 2247, 2246, 2069, 3553, 346389, 5473, 5154, 5155, 7039, 3552, 2263, 2277, 847, 5008, 5228	3590	47	16396	2.42932	0.083091	0.000328546	0.000304164
GOTERM_BP_DIRECT	GO:0032956~regulation of actin cytoskeleton organization	25	0.669703	1.03988e-05	5580, 5066, 25, 4035, 8851, 7984, 253260, 6093, 7042, 57822, 3611, 1398, 55704, 5159, 6624, 9475, 7430, 5154, 2042, 387, 684, 2039, 2475, 11078, 1946	3590	47	16396	2.42932	0.083091	0.000328546	0.000304164
GOTERM_CC_DIRECT	GO:0031234~extrinsic component of cytoplasmic side of plasma membrane	31	0.830431	1.0539e-05	9267, 25, 6850, 27, 3716, 3717, 695, 3718, 23263, 7535, 858, 3932, 7297, 4067, 4145, 3055, 2185, 7053, 7294, 660, 640, 387, 2534, 1269, 488, 246, 10188, 5747, 6714, 3845, 3702	3662	68	17735	2.20783	0.0118177	0.000258436	0.000236899
GOTERM_BP_DIRECT	GO:0050777~negative regulation of immune response	11	0.294669	1.06071e-05	3559, 4067, 259, 3135, 10288, 1493, 11005, 50943, 1281, 3635, 7042	3590	12	16396	4.18654	0.0846832	0.000332609	0.000307926
GOTERM_BP_DIRECT	GO:0071498~cellular response to fluid shear stress	11	0.294669	1.06071e-05	7494, 760, 4780, 7980, 3037, 5311, 8841, 5743, 2185, 6714, 4208	3590	12	16396	4.18654	0.0846832	0.000332609	0.000307926
GOTERM_BP_DIRECT	GO:0048469~cell maturation	21	0.56255	1.102e-05	3280, 5991, 5452, 6366, 7422, 5354, 5972, 3398, 2034, 59067, 2260, 1050, 2625, 2624, 695, 3600, 1499, 558, 7855, 5468, 30812	3590	36	16396	2.66416	0.0878303	0.000344261	0.000318713
GOTERM_BP_DIRECT	GO:0032088~negative regulation of NF-kappaB transcription factor activity	33	0.884008	1.127e-05	7187, 4591, 9447, 4792, 11261, 29108, 114548, 57162, 84868, 2302, 655, 84166, 3654, 730249, 3656, 91662, 7874, 9314, 23411, 83737, 1029, 1545, 84875, 80279, 150684, 7128, 847, 54106, 6737, 408, 50943, 11213, 409	3590	71	16396	2.12275	0.0897311	0.000350759	0.000324729
GOTERM_CC_DIRECT	GO:0005788~endoplasmic reticulum lumen	66	1.76802	1.27688e-05	5265, 1066, 2153, 590, 2621, 2147, 632, 1299, 3630, 5611, 7373, 7057, 5154, 5155, 5034, 5199, 64167, 1075, 2159, 1861, 2158, 567, 2157, 56983, 920, 5743, 5624, 9563, 340075, 27348, 1284, 23621, 1281, 7184, 10956, 410, 411, 51661, 412, 335, 2322, 336, 2641, 414, 811, 338, 8824, 11001, 416, 5479, 4547, 89780, 7474, 11093, 3990, 64222, 1293, 1292, 1291, 1522, 2695, 821, 51752, 51237, 5329, 3309	3662	192	17735	1.66478	0.0143001	0.000306288	0.000280764
GOTERM_CC_DIRECT	GO:0042383~sarcolemma	36	0.964372	1.30335e-05	6331, 3880, 3916, 476, 1674, 10519, 5534, 10211, 4842, 859, 5339, 4988, 3856, 10060, 6443, 6641, 6442, 6445, 7412, 1293, 1292, 481, 23336, 1291, 682, 79026, 301, 302, 3908, 966, 8910, 3764, 3688, 6833, 10400, 1605	3662	85	17735	2.05115	0.0145944	0.000306288	0.000280764
GOTERM_MF_DIRECT	GO:0004693~cyclin-dependent protein serine/threonine kinase activity	20	0.535762	1.32352e-05	9133, 5891, 6792, 22858, 8851, 1022, 1021, 1020, 891, 1019, 1017, 983, 896, 1025, 984, 23097, 1024, 51755, 8558, 4117	3557	34	16472	2.72404	0.0324445	0.000611027	0.000582596
GOTERM_BP_DIRECT	GO:0045861~negative regulation of proteolysis	15	0.401822	1.35041e-05	1020, 1471, 5270, 7917, 3416, 3827, 2147, 1476, 1201, 1475, 3630, 207, 6317, 10013, 5327	3590	21	16396	3.26224	0.106538	0.000415636	0.000384791
GOTERM_BP_DIRECT	GO:0048844~artery morphogenesis	15	0.401822	1.35041e-05	3280, 7046, 7422, 2022, 2296, 4092, 27329, 7481, 348, 338, 4763, 6899, 4854, 639, 8829	3590	21	16396	3.26224	0.106538	0.000415636	0.000384791
GOTERM_BP_DIRECT	GO:0051000~positive regulation of nitric-oxide synthase activity	15	0.401822	1.35041e-05	808, 3091, 7015, 7014, 2099, 2185, 186, 348, 3630, 801, 207, 1719, 3845, 949, 2208	3590	21	16396	3.26224	0.106538	0.000415636	0.000384791
GOTERM_MF_DIRECT	GO:0000979~RNA polymerase II core promoter sequence-specific DNA binding	28	0.750067	1.35882e-05	6670, 6872, 6772, 2353, 2033, 3021, 7020, 2625, 2624, 6927, 6908, 2623, 10716, 2146, 84166, 6688, 2627, 10413, 4783, 3297, 161882, 1051, 3172, 1025, 30812, 6658, 3665, 6778	3557	57	16472	2.27481	0.0332951	0.000615915	0.000587256
GOTERM_BP_DIRECT	GO:0045599~negative regulation of fat cell differentiation	23	0.616126	1.43063e-05	22933, 89780, 7474, 4088, 4320, 5167, 7124, 9370, 23411, 182, 161882, 7040, 2625, 3638, 2624, 3569, 57761, 2852, 406, 1869, 171023, 1649, 6648	3590	42	16396	2.50105	0.112497	0.000437101	0.000404663
GOTERM_BP_DIRECT	GO:0007595~lactation	23	0.616126	1.43063e-05	3091, 5066, 6531, 7422, 7498, 7421, 9148, 8862, 1385, 2066, 7392, 7372, 462, 1723, 353, 595, 6776, 857, 538, 5469, 4513, 139596, 5617	3590	42	16396	2.50105	0.112497	0.000437101	0.000404663
GOTERM_BP_DIRECT	GO:0071363~cellular response to growth factor stimulus	24	0.642915	1.55461e-05	7057, 6198, 7133, 5155, 9314, 7291, 2064, 3381, 5083, 4193, 285, 1644, 3359, 1499, 2621, 632, 10519, 8725, 6678, 8737, 5216, 4842, 3643, 847	3590	45	16396	2.4358	0.121629	0.000473249	0.000438128
GOTERM_MF_DIRECT	GO:0043548~phosphatidylinositol 3-kinase binding	14	0.375033	1.5552e-05	5295, 7301, 8678, 3480, 1600, 3717, 2534, 476, 5159, 558, 3643, 3667, 3645, 3932	3557	19	16472	3.41222	0.0380145	0.000692343	0.000660128
GOTERM_MF_DIRECT	GO:0042826~histone deacetylase binding	42	1.1251	1.58524e-05	3280, 22933, 7189, 7023, 5245, 3320, 170506, 3065, 595, 991, 3838, 83933, 118611, 9759, 5599, 10013, 4204, 9219, 6668, 639, 10014, 5879, 4208, 5914, 7153, 3091, 7155, 9734, 5970, 266740, 8841, 9611, 9314, 1051, 5071, 142, 3009, 3304, 3303, 51176, 3642, 50943	3557	102	16472	1.90683	0.0387343	0.000693333	0.000661072
GOTERM_BP_DIRECT	GO:0007160~cell-matrix adhesion	38	1.01795	1.69897e-05	158326, 7248, 3683, 1020, 63923, 1281, 27329, 10855, 10018, 1896, 1499, 3611, 2244, 2266, 3674, 3696, 3676, 3655, 10894, 3679, 5879, 3690, 11093, 5310, 3672, 4585, 3694, 7412, 2243, 1490, 960, 3685, 8910, 6614, 3688, 4811, 3689, 947	3590	88	16396	1.97217	0.132144	0.000515313	0.000477071
GOTERM_MF_DIRECT	GO:0005031~tumor necrosis factor-activated receptor activity	16	0.42861	1.74963e-05	7132, 8784, 8771, 7133, 4055, 8764, 8797, 7293, 3604, 27242, 355, 943, 55504, 8718, 958, 939	3557	24	16472	3.08725	0.0426642	0.000752038	0.000717045
GOTERM_BP_DIRECT	GO:0043433~negative regulation of sequence-specific DNA binding transcription factor activity	29	0.776855	1.77045e-05	7341, 8431, 8399, 6375, 2099, 3066, 3162, 23028, 4092, 9063, 2621, 2146, 9759, 9817, 3170, 6045, 4221, 3398, 3397, 7291, 23411, 7293, 5292, 11331, 5621, 50943, 1649, 5727, 5925	3590	60	16396	2.20745	0.137303	0.000534284	0.000494634
GOTERM_BP_DIRECT	GO:0032922~circadian regulation of gene expression	28	0.750067	1.77433e-05	6097, 4297, 5465, 3066, 3065, 196, 55366, 6928, 1453, 10891, 10499, 1813, 9575, 5371, 25819, 8864, 5971, 5499, 3398, 23411, 7150, 9099, 1390, 468, 2673, 5500, 406, 9607	3590	57	16396	2.2435	0.137583	0.000534284	0.000494634
GOTERM_BP_DIRECT	GO:0043011~myeloid dendritic cell differentiation	14	0.375033	1.82429e-05	7189, 4055, 5971, 5663, 3662, 7040, 1437, 10538, 10537, 3565, 942, 6688, 814, 116071	3590	19	16396	3.36525	0.14117	0.000545392	0.000504917
GOTERM_BP_DIRECT	GO:0008637~apoptotic mitochondrial changes	14	0.375033	1.82429e-05	581, 4170, 3329, 10899, 1029, 487, 598, 2730, 3433, 207, 637, 2729, 638, 10105	3590	19	16396	3.36525	0.14117	0.000545392	0.000504917
GOTERM_BP_DIRECT	GO:0045909~positive regulation of vasodilation	18	0.482186	1.95154e-05	8862, 59342, 1373, 2053, 183, 2150, 3162, 186, 133, 2852, 796, 3630, 7349, 5467, 4842, 4843, 1956, 4846	3590	29	16396	2.83477	0.150238	0.000577225	0.000534389
GOTERM_BP_DIRECT	GO:0050766~positive regulation of phagocytosis	18	0.482186	1.95154e-05	7275, 6441, 4153, 7124, 5873, 29, 29108, 197, 2624, 5906, 961, 2621, 566, 3553, 613, 811, 10461, 718	3590	29	16396	2.83477	0.150238	0.000577225	0.000534389
GOTERM_BP_DIRECT	GO:0048873~homeostasis of number of cells within a tissue	18	0.482186	1.95154e-05	5781, 4297, 5741, 3574, 581, 2624, 6608, 54440, 596, 1435, 2623, 2149, 2323, 5027, 118, 924, 5879, 3845	3590	29	16396	2.83477	0.150238	0.000577225	0.000534389
GOTERM_CC_DIRECT	GO:0042470~melanosome	40	1.07152	1.96453e-05	11021, 5861, 5862, 6510, 3320, 6490, 2194, 84958, 7184, 4629, 3916, 476, 535, 4323, 5479, 10211, 10015, 5878, 5879, 3690, 6386, 5034, 6520, 7037, 5873, 2040, 682, 80331, 302, 1267, 821, 6513, 8836, 1509, 7306, 1508, 3688, 5901, 5868, 3309	3662	100	17735	1.93719	0.0219163	0.000452242	0.000414555
GOTERM_MF_DIRECT	GO:0031490~chromatin DNA binding	28	0.750067	2.0222e-05	7067, 6256, 6774, 3024, 2033, 57822, 2623, 2146, 10891, 50674, 5914, 9575, 7494, 4088, 5970, 3009, 3008, 3007, 3006, 23592, 3005, 4851, 328, 81, 7403, 3642, 604, 5469	3557	58	16472	2.23559	0.049145	0.000846845	0.000807441
GOTERM_MF_DIRECT	GO:0044325~ion channel binding	45	1.20546	2.03813e-05	808, 7341, 9100, 9001, 6331, 8557, 30818, 3320, 2273, 1499, 255057, 578, 10519, 857, 4842, 859, 10971, 6804, 10060, 4067, 5310, 5311, 9699, 3398, 24145, 1173, 6281, 55690, 2281, 3270, 2534, 444, 1003, 120892, 5621, 6336, 81, 801, 1729, 6833, 408, 706, 6714, 6717, 87	3557	113	16472	1.84415	0.0495225	0.000846845	0.000807441
GOTERM_BP_DIRECT	GO:0071353~cellular response to interleukin-4	16	0.42861	2.08772e-05	5371, 7494, 4360, 6375, 6122, 11093, 23729, 4783, 2194, 383, 2625, 51176, 10376, 6932, 3309, 9817	3590	24	16396	3.04475	0.159837	0.000615323	0.000569659
GOTERM_BP_DIRECT	GO:0030155~regulation of cell adhesion	23	0.616126	2.32574e-05	9267, 5371, 9475, 25, 6662, 27, 5310, 28514, 2022, 2185, 3383, 6093, 284217, 3908, 3576, 5500, 4008, 3911, 1901, 4659, 3606, 5979, 3714	3590	43	16396	2.44288	0.176355	0.000680667	0.000630153
GOTERM_BP_DIRECT	GO:0014823~response to activity	23	0.616126	2.32574e-05	5591, 5020, 6770, 5562, 1385, 9370, 3297, 285, 3329, 4914, 983, 2730, 632, 3586, 5467, 867, 6347, 1906, 2729, 847, 3952, 6648, 10014	3590	43	16396	2.44288	0.176355	0.000680667	0.000630153
GOTERM_BP_DIRECT	GO:0002407~dendritic cell chemotaxis	13	0.348245	2.40471e-05	6352, 729230, 6366, 7226, 7852, 1880, 1230, 1236, 3579, 1235, 1234, 3577, 3146	3590	17	16396	3.49251	0.181763	0.000701318	0.000649272
GOTERM_BP_DIRECT	GO:0002931~response to ischemia	19	0.508974	2.42085e-05	8864, 8996, 7345, 24145, 9131, 23017, 3329, 5608, 596, 79625, 10519, 10891, 857, 1958, 815, 4217, 4208, 10105, 1978	3590	32	16396	2.71173	0.182864	0.000703565	0.000651352
GOTERM_BP_DIRECT	GO:0050796~regulation of insulin secretion	31	0.830431	2.45555e-05	6352, 7124, 292, 293, 23568, 6927, 3458, 773, 2641, 2740, 777, 3553, 4544, 5578, 4843, 3952, 10411, 6804, 9575, 8864, 5991, 3172, 4082, 2778, 5906, 1268, 2695, 6513, 406, 6833, 9607	3590	67	16396	2.11315	0.185226	0.00070871	0.000656115
GOTERM_BP_DIRECT	GO:0032868~response to insulin	31	0.830431	2.45555e-05	6198, 22937, 7248, 5465, 59341, 51083, 2170, 133, 5798, 5315, 3952, 4986, 1958, 139596, 8743, 5970, 4067, 3992, 181, 23411, 7097, 3569, 3586, 2475, 8836, 56729, 847, 6833, 5009, 3667, 4878	3590	67	16396	2.11315	0.185226	0.00070871	0.000656115
GOTERM_CC_DIRECT	GO:0005765~lysosomal membrane	86	2.30378	2.60127e-05	4012, 5663, 10053, 5862, 3123, 3482, 10855, 2548, 3119, 3117, 3916, 2028, 950, 3115, 3113, 910, 7316, 92979, 912, 7879, 10211, 84283, 2629, 10410, 7098, 219931, 8546, 5476, 57192, 121665, 3126, 523, 83985, 3125, 55016, 2475, 51257, 968, 408, 3920, 1080, 8673, 4074, 5167, 7226, 4035, 4036, 290, 2770, 220972, 23545, 9482, 4948, 4905, 1950, 972, 1356, 57521, 4864, 55823, 55745, 10312, 5878, 7311, 81…	3662	273	17735	1.52563	0.0289164	0.000586847	0.000537943
GOTERM_MF_DIRECT	GO:0005161~platelet-derived growth factor receptor binding	12	0.321457	2.66251e-05	5728, 2081, 3690, 5154, 5155, 7422, 4067, 5156, 3554, 2277, 5159, 3678	3557	15	16472	3.70469	0.0641974	0.00108814	0.00103751
GOTERM_BP_DIRECT	GO:0040018~positive regulation of multicellular organism growth	20	0.535762	2.84145e-05	7253, 7430, 6531, 1385, 2693, 3297, 8091, 2691, 2690, 8195, 6608, 596, 1435, 2688, 10658, 51761, 5479, 55636, 7429, 1813	3590	35	16396	2.60979	0.211038	0.000817261	0.00075661
GOTERM_BP_DIRECT	GO:0035987~endodermal cell differentiation	17	0.455398	2.85415e-05	1284, 8091, 1291, 3281, 4838, 3624, 2335, 4323, 3685, 4313, 3676, 83881, 3689, 3678, 4317, 3679, 4318	3590	27	16396	2.8756	0.211873	0.000818091	0.000757379
GOTERM_BP_DIRECT	GO:0071345~cellular response to cytokine stimulus	15	0.401822	2.96351e-05	91662, 4792, 7852, 4311, 1440, 3596, 1436, 1236, 1025, 51176, 2322, 942, 3676, 8807, 10456	3590	22	16396	3.11395	0.219031	0.00084364	0.000781032
GOTERM_BP_DIRECT	GO:0045453~bone resorption	15	0.401822	2.96351e-05	50507, 7189, 5880, 9545, 5741, 3574, 2185, 154, 1513, 6927, 1499, 7879, 5879, 6714, 54	3590	22	16396	3.11395	0.219031	0.00084364	0.000781032
GOTERM_BP_DIRECT	GO:1904707~positive regulation of vascular smooth muscle cell proliferation	12	0.321457	3.05938e-05	2081, 7494, 3717, 5155, 7015, 3586, 4313, 183, 4217, 4835, 4318, 4193	3590	15	16396	3.6537	0.225252	0.000862103	0.000798125
GOTERM_BP_DIRECT	GO:0043277~apoptotic cell clearance	12	0.321457	3.05938e-05	8685, 7301, 246, 2621, 4035, 3146, 3685, 558, 10461, 948, 5914, 7052	3590	15	16396	3.6537	0.225252	0.000862103	0.000798125
GOTERM_BP_DIRECT	GO:0050930~induction of positive chemotaxis	12	0.321457	3.05938e-05	177, 3603, 9048, 7422, 6387, 566, 7424, 3576, 2277, 2255, 7423, 5228	3590	15	16396	3.6537	0.225252	0.000862103	0.000798125
GOTERM_CC_DIRECT	GO:0001772~immunological synapse	19	0.508974	3.14641e-05	7430, 3002, 3001, 3383, 3958, 84868, 399, 940, 214, 963, 975, 7535, 923, 10015, 27040, 3932, 916, 8915, 4627	3662	34	17735	2.70637	0.0348696	0.000695912	0.00063792
GOTERM_BP_DIRECT	GO:0006364~rRNA processing	73	1.95553	3.21816e-05	6230, 6155, 6232, 9188, 6231, 6234, 6159, 11340, 6235, 2197, 6191, 6193, 6192, 6194, 23404, 27042, 51121, 55720, 1453, 6227, 6229, 11102, 6228, 5393, 5394, 6122, 6124, 6167, 6203, 6202, 79080, 25873, 23411, 23016, 6041, 1029, 26168, 3921, 4736, 2091, 6132, 6135, 6137, 6136, 6171, 6173, 6204, 10199, 6129, 6209, 6208, 10556, 9136, 6141, 6144, 6188, 6187, 6143, 6223, 7311, 6189, 6222, 9775, 6224, 22…	3590	212	16396	1.57264	0.235446	0.000903793	0.000836721
GOTERM_MF_DIRECT	GO:0005149~interleukin-1 receptor binding	11	0.294669	3.24261e-05	3557, 7100, 27177, 56300, 51135, 3553, 27178, 3552, 54106, 26525, 84639	3557	13	16472	3.91843	0.0776284	0.00129249	0.00123235
GOTERM_MF_DIRECT	GO:0008144~drug binding	33	0.884008	3.26623e-05	6531, 26, 49, 5465, 2350, 2194, 6608, 3559, 29881, 51284, 213, 2168, 1719, 6624, 5836, 1813, 1559, 5914, 1119, 1636, 7153, 10280, 7298, 4860, 1131, 481, 1723, 1565, 1268, 51311, 5467, 5468, 8856	3557	75	16472	2.03758	0.0781712	0.00129249	0.00123235
GOTERM_MF_DIRECT	GO:0045236~CXCR chemokine receptor binding	9	0.241093	3.4114e-05	6372, 2921, 2920, 5197, 5473, 6374, 6387, 2919, 83737	3557	9	16472	4.63087	0.0815001	0.00132885	0.00126701
GOTERM_BP_DIRECT	GO:0033574~response to testosterone	18	0.482186	3.58559e-05	7057, 6198, 2056, 3297, 1019, 551, 1843, 2821, 2796, 632, 1672, 811, 768, 1906, 4678, 2629, 706, 6915	3590	30	16396	2.74028	0.258526	0.00100025	0.000926019
GOTERM_BP_DIRECT	GO:0043200~response to amino acid	18	0.482186	3.58559e-05	4067, 5970, 6750, 1373, 3383, 1490, 383, 3569, 1027, 1147, 2695, 2475, 6347, 1906, 836, 4524, 10400, 2937	3590	30	16396	2.74028	0.258526	0.00100025	0.000926019
GOTERM_MF_DIRECT	GO:0016814~hydrolase activity, acting on carbon-nitrogen (but not peptide) bonds, in cyclic amidines	10	0.267881	3.613e-05	27350, 60489, 140564, 57379, 403314, 164668, 200315, 339, 200316, 9582	3557	11	16472	4.20988	0.0861033	0.00138573	0.00132125
GOTERM_BP_DIRECT	GO:0046330~positive regulation of JNK cascade	30	0.803643	3.6237e-05	114609, 4055, 7124, 5345, 59341, 29108, 2150, 1236, 3553, 998, 55504, 6504, 8767, 939, 7099, 7098, 6386, 6366, 3552, 64127, 2185, 57551, 1490, 3146, 8737, 54106, 4217, 4615, 4616, 1647	3590	65	16396	2.10791	0.260879	0.00100751	0.000932739
GOTERM_BP_DIRECT	GO:0071360~cellular response to exogenous dsRNA	11	0.294669	3.68748e-05	4261, 7098, 3456, 3434, 340061, 115004, 10211, 857, 56829, 57506, 79594	3590	13	16396	3.8645	0.264802	0.00102184	0.000946004
GOTERM_BP_DIRECT	GO:0050778~positive regulation of immune response	9	0.241093	3.79915e-05	282616, 1511, 3600, 1991, 101180976, 7042, 5319, 282617, 282618	3590	9	16396	4.56713	0.271619	0.00104239	0.000965035
GOTERM_BP_DIRECT	GO:0071223~cellular response to lipoteichoic acid	9	0.241093	3.79915e-05	929, 7099, 6364, 114609, 3929, 8767, 948, 7097, 54209	3590	9	16396	4.56713	0.271619	0.00104239	0.000965035
GOTERM_BP_DIRECT	GO:0009972~cytidine deamination	9	0.241093	3.79915e-05	27350, 60489, 57379, 164668, 200315, 339, 978, 200316, 10930	3590	9	16396	4.56713	0.271619	0.00104239	0.000965035
GOTERM_BP_DIRECT	GO:0030097~hemopoiesis	28	0.750067	3.84576e-05	28514, 7042, 6708, 2624, 1436, 3815, 1435, 675, 2322, 1397, 119, 3932, 6901, 6648, 89780, 5155, 8301, 219790, 182, 284, 861, 864, 2872, 3586, 8879, 10682, 947, 7704	3590	59	16396	2.16745	0.274446	0.00105172	0.000973672
GOTERM_MF_DIRECT	GO:0004896~cytokine receptor activity	20	0.535762	3.90429e-05	4352, 163702, 3563, 3561, 3594, 3572, 2152, 2690, 3570, 9173, 960, 3568, 3601, 972, 3566, 2322, 1441, 3597, 3575, 133396	3557	36	16472	2.5727	0.0927134	0.00145594	0.00138819
GOTERM_BP_DIRECT	GO:0016049~cell growth	27	0.723279	3.91145e-05	6098, 2012, 7040, 63923, 7042, 596, 1655, 773, 26471, 57521, 3575, 10495, 6548, 859, 7494, 3690, 7298, 58, 6520, 259230, 3569, 367, 79625, 2475, 3685, 51213, 1906	3590	56	16396	2.20201	0.278411	0.00106619	0.000987067
GOTERM_MF_DIRECT	GO:0003705~transcription factor activity, RNA polymerase II distal enhancer sequence-specific binding	30	0.803643	3.91286e-05	9541, 7023, 4772, 5741, 7080, 1385, 2296, 6591, 6928, 6688, 2627, 3091, 5991, 64321, 6662, 5970, 6862, 3394, 1051, 7392, 1050, 3172, 466, 51176, 1386, 50943, 6736, 3725, 2516, 140628	3557	66	16472	2.10494	0.0929072	0.00145594	0.00138819
GOTERM_BP_DIRECT	GO:0048511~rhythmic process	26	0.696491	3.93702e-05	5582, 4791, 5562, 5563, 8851, 7080, 1660, 22871, 1020, 1457, 1655, 2146, 5599, 5591, 150094, 7153, 9475, 7291, 3131, 1390, 23291, 1387, 5468, 5601, 5602, 10765	3590	53	16396	2.24048	0.279948	0.00106966	0.000990282
GOTERM_BP_DIRECT	GO:0034116~positive regulation of heterotypic cell-cell adhesion	10	0.267881	4.06608e-05	960, 246, 7124, 655, 3553, 3586, 2244, 2266, 2243, 10211	3590	11	16396	4.15194	0.28766	0.00109404	0.00101285
GOTERM_BP_DIRECT	GO:0042535~positive regulation of tumor necrosis factor biosynthetic process	10	0.267881	4.06608e-05	1536, 7099, 7057, 3315, 729230, 566, 3929, 943, 9261, 7096	3590	11	16396	4.15194	0.28766	0.00109404	0.00101285
GOTERM_BP_DIRECT	GO:0033690~positive regulation of osteoblast proliferation	10	0.267881	4.06608e-05	10855, 4041, 650, 2623, 25, 4057, 3685, 30812, 338773, 3491	3590	11	16396	4.15194	0.28766	0.00109404	0.00101285
GOTERM_BP_DIRECT	GO:0007569~cell aging	16	0.42861	4.16198e-05	50507, 23636, 4282, 7157, 23411, 3383, 596, 675, 983, 3611, 632, 2475, 4335, 6647, 3987, 4869	3590	25	16396	2.92296	0.293336	0.00110974	0.00102739
GOTERM_BP_DIRECT	GO:0014911~positive regulation of smooth muscle cell migration	14	0.375033	4.16436e-05	50507, 6352, 6198, 5155, 596, 4609, 3479, 3037, 5159, 9759, 56729, 10631, 6714, 8829	3590	20	16396	3.19699	0.293476	0.00110974	0.00102739
GOTERM_BP_DIRECT	GO:0071375~cellular response to peptide hormone stimulus	14	0.375033	4.16436e-05	7494, 4790, 5970, 4221, 1583, 4193, 2534, 2852, 1584, 328, 1906, 5447, 857, 6714	3590	20	16396	3.19699	0.293476	0.00110974	0.00102739
GOTERM_BP_DIRECT	GO:0070059~intrinsic apoptotic signaling pathway in response to endoplasmic reticulum stress	19	0.508974	4.23793e-05	2081, 3093, 5371, 7494, 5366, 9131, 1051, 581, 7917, 2932, 596, 487, 57761, 27113, 578, 468, 317, 4217, 1649	3590	33	16396	2.62956	0.297799	0.00112218	0.0010389
GOTERM_BP_DIRECT	GO:1902042~negative regulation of extrinsic apoptotic signaling pathway via death domain receptors	19	0.508974	4.23793e-05	3082, 5054, 8743, 5894, 8797, 2243, 3383, 3162, 672, 2876, 355, 356, 841, 2244, 2266, 8737, 7128, 8837, 4846	3590	33	16396	2.62956	0.297799	0.00112218	0.0010389
GOTERM_BP_DIRECT	GO:0016485~protein processing	32	0.857219	4.62197e-05	7385, 5122, 5045, 5046, 5663, 5289, 5125, 5664, 3002, 2152, 3416, 1215, 1511, 4323, 834, 11093, 9159, 5653, 2161, 26085, 54760, 1369, 1368, 102, 10988, 1520, 1201, 566, 5027, 5727, 1889, 9509	3590	72	16396	2.02984	0.31994	0.00122	0.00112946
GOTERM_BP_DIRECT	GO:0045668~negative regulation of osteoblast differentiation	21	0.56255	5.21751e-05	4041, 4077, 4088, 25819, 6497, 7124, 4221, 8313, 10140, 3398, 3397, 1021, 7291, 9241, 374, 10507, 51564, 2662, 4851, 9759, 5727	3590	39	16396	2.45922	0.352901	0.00137285	0.00127097
GOTERM_BP_DIRECT	GO:0007179~transforming growth factor beta receptor signaling pathway	38	1.01795	5.44909e-05	50848, 7046, 7122, 5045, 6497, 1385, 2353, 7040, 1281, 4092, 7042, 335, 2662, 7316, 6347, 9518, 10454, 8200, 5371, 4087, 5155, 4088, 7311, 4089, 5796, 3397, 2022, 142, 5590, 9372, 387, 1003, 867, 3688, 409, 5747, 6714, 3725	3590	92	16396	1.88642	0.365283	0.00142927	0.0013232
GOTERM_BP_DIRECT	GO:0045669~positive regulation of osteoblast differentiation	28	0.750067	5.54375e-05	3082, 4057, 5587, 9260, 338773, 650, 652, 2247, 3479, 1499, 3611, 655, 2201, 8626, 659, 4208, 80381, 3572, 1052, 182, 1051, 3570, 1050, 3491, 3727, 2778, 3569, 8519	3590	60	16396	2.13133	0.370275	0.00144954	0.00134197
GOTERM_MF_DIRECT	GO:0044822~poly(A) RNA binding	297	7.95607	5.75246e-05	6230, 8894, 6232, 9188, 6231, 6234, 64710, 23049, 5937, 10656, 10658, 2665, 6227, 118, 7316, 4841, 5930, 6229, 6228, 3875, 5936, 5393, 5394, 6122, 8661, 5034, 6124, 79080, 5037, 24148, 64848, 2317, 81844, 57510, 5700, 7329, 219927, 3646, 4736, 7341, 6132, 6135, 6137, 6136, 114049, 132, 26097, 498, 85437, 1476, 811, 5710, 5832, 11168, 1915, 10199, 6129, 54938, 4627, 51428, 4869, 6144, 11171, 6143,…	3557	1126	16472	1.22146	0.133554	0.00210895	0.00201082
GOTERM_BP_DIRECT	GO:0030225~macrophage differentiation	13	0.348245	5.77149e-05	7422, 1053, 23411, 1050, 142, 1436, 1435, 652, 841, 998, 6688, 133396, 4318	3590	18	16396	3.29848	0.382126	0.00149969	0.00138839
GOTERM_BP_DIRECT	GO:0002690~positive regulation of leukocyte chemotaxis	13	0.348245	5.77149e-05	6373, 6372, 5196, 4283, 6375, 5197, 5473, 6374, 3570, 2150, 3569, 6868, 3627	3590	18	16396	3.29848	0.382126	0.00149969	0.00138839
GOTERM_BP_DIRECT	GO:0009408~response to heat	24	0.642915	5.84705e-05	929, 6198, 6387, 6750, 100507436, 3320, 3297, 3490, 3329, 4519, 5609, 3569, 3479, 796, 1244, 5313, 6347, 207, 11168, 4842, 6647, 2729, 5008, 4846	3590	48	16396	2.28357	0.386009	0.0015146	0.0014022
GOTERM_MF_DIRECT	GO:0001540~beta-amyloid binding	19	0.508974	5.90744e-05	25825, 9445, 81618, 23542, 1471, 23621, 26119, 590, 7042, 1139, 3416, 10307, 972, 26232, 335, 348, 7855, 89832, 43	3557	34	16472	2.58784	0.136894	0.00213438	0.00203507
GOTERM_BP_DIRECT	GO:0045662~negative regulation of myoblast differentiation	15	0.401822	6.04574e-05	6361, 9573, 6662, 9547, 7124, 8048, 28514, 7040, 652, 4851, 5467, 30812, 1649, 3606, 3627	3590	23	16396	2.97856	0.396102	0.0015564	0.0014409
GOTERM_BP_DIRECT	GO:0043278~response to morphine	15	0.401822	6.04574e-05	5581, 5582, 5970, 6863, 2690, 4193, 100, 2821, 1268, 2475, 2354, 5536, 4986, 1813, 2902	3590	23	16396	2.97856	0.396102	0.0015564	0.0014409
GOTERM_MF_DIRECT	GO:0047485~protein N-terminus binding	39	1.04474	6.23085e-05	7189, 6531, 6597, 7248, 2571, 3065, 7040, 8153, 472, 2966, 1459, 1634, 2745, 1457, 6227, 6622, 4204, 10971, 10611, 4923, 6804, 10456, 7450, 6386, 4683, 5970, 7157, 4221, 3397, 142, 241, 1984, 55770, 11331, 81, 6812, 4778, 5604, 3646	3557	97	16472	1.8619	0.143823	0.00221907	0.00211582
GOTERM_CC_DIRECT	GO:0005783~endoplasmic reticulum	216	5.78623	6.25835e-05	5265, 30818, 3638, 596, 476, 84447, 7450, 65010, 53829, 5034, 64167, 24145, 1471, 241, 64848, 362, 252995, 1588, 488, 55697, 25, 9761, 6253, 5045, 5046, 8678, 10998, 1116, 29121, 10519, 811, 4864, 3776, 4988, 51428, 3791, 9896, 91543, 9897, 56681, 8560, 10404, 81502, 821, 7108, 5604, 3309, 54708, 11261, 2353, 29108, 114548, 8692, 10857, 831, 3433, 5611, 55922, 10178, 3678, 10058, 2902, 2901, 7494…	3662	823	17735	1.27106	0.068162	0.00135758	0.00124445
GOTERM_CC_DIRECT	GO:0000784~nuclear chromosome, telomeric region	47	1.25904	6.74399e-05	4172, 4173, 8352, 7520, 9984, 80119, 3021, 8350, 8351, 23028, 472, 675, 80169, 5514, 5976, 84464, 5591, 5371, 8520, 65057, 7015, 5111, 4683, 7014, 5431, 4221, 6741, 5499, 2067, 8361, 8362, 142, 8360, 2237, 983, 55655, 545, 546, 100134934, 6117, 5500, 328, 5424, 5888, 8658, 4436, 80351	3662	130	17735	1.75092	0.0732531	0.00140619	0.00128901
GOTERM_BP_DIRECT	GO:0007265~Ras protein signal transduction	31	0.830431	6.76325e-05	8831, 8315, 6016, 4893, 6654, 5587, 9402, 9261, 1017, 2247, 3479, 1432, 4763, 8844, 10155, 27040, 6386, 7157, 2782, 1029, 10769, 9908, 1786, 6237, 5600, 128239, 7867, 10146, 3845, 3725, 5925	3590	70	16396	2.02259	0.431191	0.00173576	0.00160695
GOTERM_CC_DIRECT	GO:0030139~endocytic vesicle	25	0.669703	6.82119e-05	114609, 100506658, 4036, 3482, 8692, 57449, 54413, 335, 10938, 6347, 7018, 55823, 3799, 5878, 1813, 1956, 9378, 6441, 5872, 19, 30011, 1803, 409, 5868, 2319	3662	54	17735	2.24212	0.0740598	0.00140619	0.00128901
GOTERM_CC_DIRECT	GO:0005739~mitochondrion	330	8.84008	6.85641e-05	5264, 8655, 1583, 4170, 471, 10899, 596, 4609, 598, 57509, 9617, 4842, 137872, 4724, 57506, 6901, 84681, 9619, 8540, 1594, 1352, 3098, 1591, 29957, 51095, 1346, 487, 2796, 1584, 128, 3764, 9868, 22, 25, 5166, 4077, 4199, 8678, 4190, 2690, 28958, 3417, 3416, 81876, 498, 81631, 114971, 5832, 57406, 730249, 54938, 815, 10993, 31, 32, 3418, 34, 38, 91543, 2100, 1371, 8560, 7350, 142, 5728, 4519, 3304…	3662	1325	17735	1.20618	0.0744277	0.00140619	0.00128901
GOTERM_BP_DIRECT	GO:0001503~ossification	34	0.910796	7.50487e-05	6670, 7123, 7189, 7067, 6696, 4057, 4256, 9260, 170506, 2296, 338773, 26578, 3481, 3381, 197, 596, 655, 1956, 1834, 6781, 6662, 4882, 7291, 1490, 9451, 861, 246, 864, 6678, 6779, 649, 4318, 8519, 1009	3590	80	16396	1.94103	0.465316	0.00192019	0.00177769
GOTERM_BP_DIRECT	GO:0016925~protein sumoylation	45	1.20546	7.75664e-05	6670, 7341, 64135, 8535, 129401, 8554, 6015, 29843, 9063, 3183, 4193, 79594, 672, 26054, 332, 4928, 55143, 10735, 51564, 55746, 10155, 23636, 5371, 7153, 6045, 8243, 7155, 5111, 4286, 7157, 23511, 7150, 8021, 8480, 79023, 142, 1029, 57332, 53335, 79902, 6117, 5885, 7329, 6613, 5903	3590	117	16396	1.75659	0.47643	0.00197145	0.00182514
GOTERM_BP_DIRECT	GO:0035994~response to muscle stretch	12	0.321457	7.84427e-05	2821, 4790, 4792, 5970, 1432, 8557, 5894, 2353, 1906, 6548, 4878, 3725	3590	16	16396	3.42535	0.480243	0.00197145	0.00182514
GOTERM_BP_DIRECT	GO:0035162~embryonic hemopoiesis	12	0.321457	7.84427e-05	2625, 3815, 3091, 2623, 4297, 3791, 2323, 4254, 3562, 5469, 161882, 7173	3590	16	16396	3.42535	0.480243	0.00197145	0.00182514
GOTERM_BP_DIRECT	GO:0060338~regulation of type I interferon-mediated signaling pathway	16	0.42861	7.84703e-05	7297, 5781, 6773, 6772, 11274, 3442, 3440, 3451, 3439, 3716, 3447, 3456, 3444, 3455, 3454, 5777	3590	26	16396	2.81054	0.480363	0.00197145	0.00182514
GOTERM_BP_DIRECT	GO:2001238~positive regulation of extrinsic apoptotic signaling pathway	16	0.42861	7.84703e-05	5371, 8743, 4055, 8742, 81618, 29108, 183, 8692, 5062, 186, 2852, 51330, 8737, 857, 637, 8915	3590	26	16396	2.81054	0.480363	0.00197145	0.00182514
GOTERM_BP_DIRECT	GO:0045840~positive regulation of mitotic nuclear division	16	0.42861	7.84703e-05	6790, 4041, 5155, 7039, 3552, 3481, 3479, 1950, 940, 2069, 3553, 51203, 5159, 3630, 1906, 3643	3590	26	16396	2.81054	0.480363	0.00197145	0.00182514
GOTERM_MF_DIRECT	GO:0042169~SH2 domain binding	17	0.455398	7.90969e-05	23636, 8631, 59341, 3717, 27240, 10859, 1398, 79801, 54900, 5777, 6855, 8878, 3667, 1605, 5747, 6714, 3932	3557	29	16472	2.71465	0.178906	0.0027773	0.00264808
GOTERM_BP_DIRECT	GO:0007190~activation of adenylate cyclase activity	21	0.56255	8.2969e-05	808, 7253, 49, 5894, 1909, 153, 154, 2778, 113, 554, 796, 2774, 2740, 799, 801, 5578, 108, 109, 10486, 10487, 196883	3590	40	16396	2.39774	0.499504	0.00207821	0.00192398
GOTERM_BP_DIRECT	GO:0048538~thymus development	22	0.589338	8.59524e-05	3280, 5591, 7046, 9133, 25, 5594, 6495, 5595, 5894, 5663, 2625, 10018, 673, 596, 64919, 1499, 80169, 2255, 6647, 6899, 11035, 5604	3590	43	16396	2.33667	0.511808	0.00214649	0.0019872
GOTERM_BP_DIRECT	GO:1900182~positive regulation of protein localization to nucleus	14	0.375033	8.73704e-05	6794, 81603, 9451, 7042, 1029, 2534, 983, 2147, 80279, 3630, 207, 51512, 3976, 6714	3590	21	16396	3.04475	0.517549	0.00215932	0.00199907
GOTERM_BP_DIRECT	GO:0042752~regulation of circadian rhythm	24	0.642915	8.75014e-05	5591, 5371, 7153, 5582, 9475, 8864, 5562, 25819, 5563, 5465, 5499, 3398, 1385, 1390, 2146, 1453, 10891, 5500, 5599, 4841, 5468, 5601, 5602, 8914	3590	49	16396	2.23696	0.518076	0.00215932	0.00199907
GOTERM_BP_DIRECT	GO:0021762~substantia nigra development	24	0.642915	8.75014e-05	808, 22933, 8655, 7345, 5354, 4155, 9118, 11240, 2254, 1152, 6271, 387, 9919, 3939, 2247, 1267, 998, 801, 79109, 5810, 60, 10971, 2539, 3309	3590	49	16396	2.23696	0.518076	0.00215932	0.00199907
GOTERM_BP_DIRECT	GO:0007254~JNK cascade	24	0.642915	8.75014e-05	7189, 7311, 7124, 64127, 23542, 5609, 51135, 7316, 10044, 5599, 8517, 5601, 3654, 55504, 8767, 5602, 5734, 4920, 10045, 3656, 4217, 10454, 4868, 4615	3590	49	16396	2.23696	0.518076	0.00215932	0.00199907
GOTERM_BP_DIRECT	GO:0030308~negative regulation of cell growth	46	1.23225	8.81255e-05	6597, 6794, 5167, 5245, 2273, 7040, 8692, 7042, 79594, 7481, 596, 1654, 2487, 978, 659, 5371, 4088, 6586, 64321, 7157, 4089, 2023, 2100, 1594, 1032, 3373, 23411, 183, 9792, 5270, 3172, 186, 1029, 3624, 684, 1027, 3621, 29950, 26585, 623, 5467, 5468, 604, 4878, 4856, 4879	3590	121	16396	1.73626	0.520579	0.0021683	0.00200739
GOTERM_CC_DIRECT	GO:0034364~high-density lipoprotein particle	14	0.375033	9.05291e-05	8542, 6289, 6288, 3990, 5444, 19, 6291, 350, 341, 335, 336, 348, 3931, 55937	3662	22	17735	3.0819	0.0970801	0.00182352	0.00167156
GOTERM_CC_DIRECT	GO:0031982~vesicle	46	1.23225	9.59153e-05	8673, 808, 94025, 5286, 28, 3381, 9482, 3459, 2665, 975, 10519, 7018, 5315, 8767, 3799, 859, 4282, 9378, 65010, 7430, 4043, 4582, 8842, 4585, 8301, 64127, 1471, 2580, 2040, 5590, 27074, 387, 79026, 301, 1443, 302, 83985, 2597, 3982, 966, 207, 801, 4478, 6317, 2319, 1889	3662	128	17735	1.74045	0.10255	0.00189811	0.00173994
GOTERM_BP_DIRECT	GO:0009749~response to glucose	30	0.803643	9.89029e-05	8431, 7200, 6198, 7040, 6928, 6927, 114131, 3939, 336, 5313, 836, 1958, 7057, 4087, 6720, 9370, 2185, 1292, 1490, 3172, 2281, 285, 5728, 169026, 1027, 10628, 23098, 2695, 5467, 55937	3590	68	16396	2.01491	0.561804	0.00242632	0.00224626
GOTERM_MF_DIRECT	GO:0019955~cytokine binding	13	0.348245	0.000108731	5460, 112744, 7852, 9241, 3604, 3815, 1436, 2633, 972, 1991, 133396, 8828, 8829	3557	19	16472	3.16849	0.237363	0.00376482	0.00358964
GOTERM_BP_DIRECT	GO:0006977~DNA damage response, signal transduction by p53 class mediator resulting in cell cycle arrest	28	0.750067	0.0001108	6790, 7027, 2033, 472, 4193, 891, 1017, 2765, 1874, 55367, 7316, 4869, 5371, 4582, 5111, 9337, 7311, 7157, 581, 10769, 1027, 983, 55835, 7029, 51512, 6659, 1869, 1647	3590	62	16396	2.06258	0.603209	0.00271022	0.00250909
GOTERM_BP_DIRECT	GO:1900034~regulation of cellular response to heat	32	0.857219	0.000117146	129401, 2033, 3320, 9261, 3281, 472, 4928, 3337, 57521, 55746, 815, 818, 23636, 5594, 5595, 3297, 23411, 23511, 8021, 8480, 79023, 2932, 3304, 3303, 84335, 545, 1387, 10728, 2475, 79902, 6117, 5903	3590	75	16396	1.94864	0.623669	0.00285705	0.00264503
GOTERM_BP_DIRECT	GO:0042832~defense response to protozoan	13	0.348245	0.000125381	64581, 3662, 3394, 3592, 10538, 3569, 3458, 3566, 3565, 3586, 602, 958, 116071	3590	19	16396	3.12488	0.648658	0.00303441	0.00280922
GOTERM_BP_DIRECT	GO:0090190~positive regulation of branching involved in ureteric bud morphogenesis	13	0.348245	0.000125381	5076, 6495, 7422, 6662, 7040, 183, 9241, 186, 55366, 2668, 6608, 26585, 30812	3590	19	16396	3.12488	0.648658	0.00303441	0.00280922
GOTERM_BP_DIRECT	GO:0006950~response to stress	25	0.669703	0.000125509	5563, 3320, 23049, 9261, 7184, 231, 2740, 5599, 10131, 6446, 1956, 4869, 5594, 22926, 2185, 10209, 2475, 5600, 5601, 8878, 7867, 727, 5603, 4616, 1647	3590	53	16396	2.15431	0.649032	0.00303441	0.00280922
GOTERM_BP_DIRECT	GO:0031397~negative regulation of protein ubiquitination	21	0.56255	0.000128825	5581, 6188, 5582, 7375, 8864, 11261, 1020, 4092, 2534, 3304, 3303, 2475, 55869, 7128, 9636, 857, 2729, 408, 706, 6659, 409	3590	41	16396	2.33926	0.658609	0.00309118	0.00286178
GOTERM_BP_DIRECT	GO:0032230~positive regulation of synaptic transmission, GABAergic	10	0.267881	0.000130822	760, 5581, 9001, 135, 594857, 6863, 57555, 766, 22871, 3799	3590	12	16396	3.80594	0.66425	0.00309118	0.00286178
GOTERM_BP_DIRECT	GO:0043032~positive regulation of macrophage activation	10	0.267881	0.000130822	3329, 7057, 7474, 84868, 3929, 3566, 3586, 3596, 90865, 9173	3590	12	16396	3.80594	0.66425	0.00309118	0.00286178
GOTERM_BP_DIRECT	GO:0035815~positive regulation of renal sodium excretion	10	0.267881	0.000130822	1910, 5020, 552, 135, 6863, 1906, 183, 1813, 4879, 186	3590	12	16396	3.80594	0.66425	0.00309118	0.00286178
GOTERM_BP_DIRECT	GO:0030195~negative regulation of blood coagulation	10	0.267881	0.000130822	3827, 5054, 7056, 348, 1906, 5624, 947, 5270, 5627, 350	3590	12	16396	3.80594	0.66425	0.00309118	0.00286178
GOTERM_BP_DIRECT	GO:0097067~cellular response to thyroid hormone stimulus	10	0.267881	0.000130822	1514, 3815, 1512, 2623, 1520, 687, 10891, 4005, 5469, 1508	3590	12	16396	3.80594	0.66425	0.00309118	0.00286178
GOTERM_BP_DIRECT	GO:0032695~negative regulation of interleukin-12 production	10	0.267881	0.000130822	7057, 3718, 4210, 3586, 10464, 6504, 409, 11213, 201633, 54	3590	12	16396	3.80594	0.66425	0.00309118	0.00286178
GOTERM_BP_DIRECT	GO:0097028~dendritic cell differentiation	10	0.267881	0.000130822	1437, 2623, 10859, 2621, 4067, 2322, 7226, 3565, 558, 54209	3590	12	16396	3.80594	0.66425	0.00309118	0.00286178
GOTERM_BP_DIRECT	GO:0009887~organ morphogenesis	37	0.99116	0.000132991	7088, 6850, 4990, 7424, 2033, 2273, 5083, 2625, 2624, 650, 1634, 673, 2623, 1874, 2006, 2247, 126206, 2069, 2300, 6347, 8829, 9993, 5154, 6586, 5970, 5079, 3574, 2263, 166, 2932, 1045, 3687, 1948, 6439, 1406, 140628, 5727	3590	92	16396	1.83678	0.670272	0.00313356	0.00290102
GOTERM_MF_DIRECT	GO:0004716~receptor signaling protein tyrosine kinase activity	9	0.241093	0.000137991	3815, 6850, 7301, 3791, 4067, 2066, 3643, 2064, 1956	3557	10	16472	4.16778	0.290999	0.00464881	0.0044325
GOTERM_MF_DIRECT	GO:0033558~protein deacetylase activity	9	0.241093	0.000137991	22933, 83933, 9734, 8841, 9759, 3066, 23411, 3065, 10014	3557	10	16472	4.16778	0.290999	0.00464881	0.0044325
GOTERM_BP_DIRECT	GO:0050832~defense response to fungus	16	0.42861	0.000140881	4353, 6279, 1671, 1670, 6280, 23765, 6283, 1668, 10417, 1511, 1113, 117159, 57817, 10578, 1669, 3605	3590	27	16396	2.70645	0.691278	0.00330082	0.00305586
GOTERM_BP_DIRECT	GO:0048678~response to axon injury	16	0.42861	0.000140881	4067, 2056, 1471, 581, 383, 4914, 199, 2247, 983, 347, 2695, 6647, 3776, 6648, 1813, 3956	3590	27	16396	2.70645	0.691278	0.00330082	0.00305586
GOTERM_MF_DIRECT	GO:0071723~lipopeptide binding	8	0.214305	0.000141195	909, 910, 911, 912, 913, 10333, 7097, 7096	3557	8	16472	4.63087	0.296637	0.00469331	0.00447493
GOTERM_MF_DIRECT	GO:0001530~lipopolysaccharide binding	14	0.375033	0.000147076	929, 7099, 7097, 3329, 671, 10417, 3929, 3146, 29102, 5027, 6403, 923, 949, 54209	3557	22	16472	2.94692	0.306872	0.00482448	0.0046
GOTERM_MF_DIRECT	GO:0003713~transcription coactivator activity	79	2.11626	0.000150971	22954, 6671, 6597, 6872, 6871, 6874, 6598, 1022, 2033, 27005, 23568, 9063, 2625, 672, 1655, 1499, 10891, 10011, 6942, 50674, 133396, 10499, 915, 10413, 4802, 2626, 8805, 4261, 8864, 22926, 64321, 24148, 9792, 3726, 3727, 23054, 1387, 1386, 5467, 328, 4335, 11036, 4776, 5469, 8856, 11035, 4778, 5901, 345643, 7528, 3725, 2516, 4791, 7023, 6256, 8554, 7027, 7020, 23426, 2962, 54457, 2521, 4869, 5914…	3557	247	16472	1.48113	0.313569	0.00488795	0.00466051
GOTERM_BP_DIRECT	GO:0042359~vitamin D metabolic process	9	0.241093	0.000153171	1543, 1576, 5641, 4036, 1594, 1583, 1591, 120227, 2638	3590	10	16396	4.11042	0.721363	0.00350026	0.0032405
GOTERM_BP_DIRECT	GO:2000406~positive regulation of T cell migration	9	0.241093	0.000153171	199, 6364, 6352, 6366, 6387, 8764, 29108, 3676, 3627	3590	10	16396	4.11042	0.721363	0.00350026	0.0032405
GOTERM_BP_DIRECT	GO:0032940~secretion by cell	9	0.241093	0.000153171	55850, 5045, 7301, 5046, 558, 10461, 5270, 6804, 51192	3590	10	16396	4.11042	0.721363	0.00350026	0.0032405
GOTERM_BP_DIRECT	GO:0051272~positive regulation of cellular component movement	9	0.241093	0.000153171	3925, 7046, 7422, 6223, 4067, 81, 604, 6868, 10630	3590	10	16396	4.11042	0.721363	0.00350026	0.0032405
GOTERM_BP_DIRECT	GO:0033148~positive regulation of intracellular estrogen receptor signaling pathway	9	0.241093	0.000153171	1655, 79447, 367, 3169, 5058, 6502, 5469, 10521, 142	3590	10	16396	4.11042	0.721363	0.00350026	0.0032405
GOTERM_BP_DIRECT	GO:0033160~positive regulation of protein import into nucleus, translocation	9	0.241093	0.000153171	3569, 3717, 983, 3479, 51366, 340061, 3320, 5469, 57506	3590	10	16396	4.11042	0.721363	0.00350026	0.0032405
GOTERM_BP_DIRECT	GO:0048643~positive regulation of skeletal muscle tissue development	9	0.241093	0.000153171	89780, 50937, 5562, 1499, 64321, 3156, 10211, 9099, 4208	3590	10	16396	4.11042	0.721363	0.00350026	0.0032405
GOTERM_BP_DIRECT	GO:0006476~protein deacetylation	9	0.241093	0.000153171	22933, 23408, 83933, 8841, 23410, 10013, 23411, 3065, 10014	3590	10	16396	4.11042	0.721363	0.00350026	0.0032405
GOTERM_BP_DIRECT	GO:0035455~response to interferon-alpha	9	0.241093	0.000153171	27074, 684, 103, 10581, 3455, 5610, 4600, 10410, 8519	3590	10	16396	4.11042	0.721363	0.00350026	0.0032405
GOTERM_BP_DIRECT	GO:0010544~negative regulation of platelet activation	8	0.214305	0.000155086	7056, 5154, 5155, 2147, 5156, 348, 114897, 4846	3590	8	16396	4.56713	0.72578	0.00351513	0.00325427
GOTERM_BP_DIRECT	GO:0045348~positive regulation of MHC class II biosynthetic process	8	0.214305	0.000155086	7099, 4261, 7494, 3458, 566, 3565, 3586, 23411	3590	8	16396	4.56713	0.72578	0.00351513	0.00325427
GOTERM_BP_DIRECT	GO:0050702~interleukin-1 beta secretion	8	0.214305	0.000155086	7099, 115362, 9447, 19, 58484, 948, 2150, 10333	3590	8	16396	4.56713	0.72578	0.00351513	0.00325427
GOTERM_MF_DIRECT	GO:0003823~antigen binding	19	0.508974	0.000155284	100507436, 2220, 3077, 7040, 3902, 2217, 3107, 10417, 563, 3106, 3512, 3543, 3575, 3135, 100423062, 6504, 3676, 958, 11006	3557	36	16472	2.44407	0.320908	0.00496312	0.00473218
GOTERM_BP_DIRECT	GO:0001822~kidney development	35	0.937584	0.000159783	7046, 6495, 7422, 9104, 7248, 5125, 4311, 1063, 54790, 7161, 8692, 7042, 7020, 2625, 6928, 1634, 10018, 7917, 652, 3037, 255738, 1636, 5310, 5972, 183, 26108, 581, 185, 760, 1028, 8879, 3764, 4953, 65250, 2736	3590	86	16396	1.85872	0.73632	0.0036118	0.00334376
GOTERM_BP_DIRECT	GO:0045776~negative regulation of blood pressure	17	0.455398	0.000161238	5020, 7424, 5465, 8862, 59342, 9370, 1392, 8195, 1268, 796, 623, 7349, 4842, 4843, 2837, 4846, 1813	3590	30	16396	2.58804	0.7395	0.00363482	0.00336507
GOTERM_BP_DIRECT	GO:0034113~heterotypic cell-cell adhesion	14	0.375033	0.000170766	3690, 23114, 284359, 965, 3685, 3687, 912, 10288, 3676, 3688, 3689, 914, 3678, 3679	3590	22	16396	2.90636	0.759407	0.00381865	0.00353527
GOTERM_BP_DIRECT	GO:0001836~release of cytochrome c from mitochondria	14	0.375033	0.000170766	5366, 581, 1191, 2537, 596, 597, 27113, 598, 79017, 578, 51024, 637, 6648, 3725	3590	22	16396	2.90636	0.759407	0.00381865	0.00353527
GOTERM_BP_DIRECT	GO:0001954~positive regulation of cell-matrix adhesion	14	0.375033	0.000170766	6366, 7424, 1021, 2185, 2041, 6370, 5590, 2932, 1435, 1236, 3611, 10519, 56477, 948	3590	22	16396	2.90636	0.759407	0.00381865	0.00353527
GOTERM_BP_DIRECT	GO:0006874~cellular calcium ion homeostasis	37	0.99116	0.000171766	6352, 6355, 6354, 7421, 9104, 6357, 6356, 5741, 59341, 2053, 7040, 1139, 310, 1991, 6348, 811, 6347, 89832, 5579, 857, 958, 1813, 2902, 7178, 219931, 6781, 729230, 6387, 6346, 8048, 7137, 1230, 481, 488, 348, 6358, 7504	3590	93	16396	1.81703	0.761407	0.00383076	0.00354647
GOTERM_BP_DIRECT	GO:0030224~monocyte differentiation	12	0.321457	0.000178168	1437, 6670, 1436, 652, 7422, 8544, 5468, 5469, 133396, 4208, 4627, 3725	3590	17	16396	3.22386	0.773817	0.00395239	0.00365908
GOTERM_BP_DIRECT	GO:0090201~negative regulation of release of cytochrome c from mitochondria	12	0.321457	0.000178168	3082, 551, 2876, 4000, 8996, 598, 3479, 207, 2395, 409, 5071, 10105	3590	17	16396	3.22386	0.773817	0.00395239	0.00365908
GOTERM_BP_DIRECT	GO:0043407~negative regulation of MAP kinase activity	19	0.508974	0.000187116	5580, 23636, 7345, 4067, 3156, 9370, 8692, 6609, 1843, 652, 655, 3553, 80279, 348, 4763, 5777, 2629, 859, 11213	3590	36	16396	2.41043	0.790088	0.00412893	0.00382252
GOTERM_BP_DIRECT	GO:0010043~response to zinc ion	19	0.508974	0.000187116	6279, 7412, 1396, 1373, 23498, 383, 5728, 169026, 760, 632, 5027, 3861, 57817, 8836, 339, 538, 6833, 5009, 6648	3590	36	16396	2.41043	0.790088	0.00412893	0.00382252
GOTERM_CC_DIRECT	GO:0030529~intracellular ribonucleoprotein complex	47	1.25904	0.000187337	9961, 6155, 4691, 6632, 10492, 2078, 1660, 6191, 6193, 3183, 6194, 672, 494115, 1655, 10658, 81892, 1653, 7514, 10011, 6129, 1859, 10432, 4869, 23636, 6188, 6124, 22827, 6189, 9775, 6203, 6741, 6202, 3178, 26986, 200316, 143, 2932, 9908, 60489, 2058, 2597, 120892, 51574, 81, 60, 6737, 10146	3662	135	17735	1.68608	0.190498	0.00364338	0.00333977
GOTERM_BP_DIRECT	GO:0000302~response to reactive oxygen species	20	0.535762	0.000193266	50507, 7296, 7001, 5034, 3373, 8692, 25824, 7295, 1536, 2878, 2876, 347, 348, 10891, 5798, 6647, 847, 54205, 2936, 6648	3590	39	16396	2.34212	0.800588	0.0042422	0.00392737
GOTERM_BP_DIRECT	GO:0032570~response to progesterone	20	0.535762	0.000193266	5020, 7057, 7298, 5970, 6720, 2353, 8061, 7040, 7042, 257062, 7097, 2821, 10628, 952, 2354, 5732, 6347, 857, 706, 347732	3590	39	16396	2.34212	0.800588	0.0042422	0.00392737
GOTERM_BP_DIRECT	GO:0008542~visual learning	22	0.589338	0.000194851	3091, 4297, 8831, 594857, 8554, 1385, 3156, 1020, 3274, 351, 2515, 3815, 673, 54413, 3269, 2475, 4763, 4204, 3688, 3845, 1813, 2902	3590	45	16396	2.23282	0.803208	0.00426576	0.00394919
GOTERM_BP_DIRECT	GO:0006805~xenobiotic metabolic process	32	0.857219	0.000207958	8574, 6097, 26, 1066, 2053, 2052, 196, 1558, 1557, 1555, 2941, 1576, 314, 8824, 218, 1559, 728441, 6283, 3172, 6818, 10249, 6817, 1645, 1545, 2678, 1544, 1565, 5742, 5447, 1728, 8856, 8639	3590	77	16396	1.89803	0.823595	0.00454079	0.00420381
GOTERM_BP_DIRECT	GO:0070423~nucleotide-binding oligomerization domain containing signaling pathway	15	0.401822	0.000210369	7189, 7311, 3551, 64127, 83737, 5608, 1147, 841, 7316, 8517, 7128, 3654, 8767, 3656, 10454	3590	25	16396	2.74028	0.827108	0.00454583	0.00420848
GOTERM_BP_DIRECT	GO:0042327~positive regulation of phosphorylation	15	0.401822	0.000210369	4282, 7057, 6386, 6352, 8862, 3440, 283, 374, 367, 3611, 1950, 2069, 3655, 1956, 8915	3590	25	16396	2.74028	0.827108	0.00454583	0.00420848
GOTERM_BP_DIRECT	GO:0030878~thyroid gland development	15	0.401822	0.000210369	50506, 5594, 7067, 6495, 4088, 5595, 5894, 7038, 7080, 3087, 1081, 673, 2255, 6899, 5604	3590	25	16396	2.74028	0.827108	0.00454583	0.00420848
GOTERM_BP_DIRECT	GO:0019433~triglyceride catabolic process	15	0.401822	0.000210369	3990, 3991, 1373, 2172, 646480, 2170, 345, 335, 2169, 2168, 57104, 2167, 348, 338, 11343	3590	25	16396	2.74028	0.827108	0.00454583	0.00420848
GOTERM_MF_DIRECT	GO:0030332~cyclin binding	13	0.348245	0.000218394	8452, 8841, 1021, 2580, 9099, 29969, 1019, 1017, 983, 80279, 3642, 51755, 5727	3557	20	16472	3.01006	0.41975	0.00689184	0.00657116
GOTERM_BP_DIRECT	GO:0001933~negative regulation of protein phosphorylation	27	0.723279	0.000225263	58190, 11261, 3486, 7040, 891, 3558, 10519, 10891, 6622, 5536, 5591, 7498, 4067, 4221, 25998, 23435, 5071, 22863, 284, 5728, 120892, 80279, 2475, 623, 5621, 3642, 409	3590	61	16396	2.02152	0.847312	0.0048551	0.00449479
GOTERM_BP_DIRECT	GO:0050821~protein stabilization	49	1.31262	0.000227367	5580, 6872, 11261, 8975, 7248, 1385, 2033, 3320, 4092, 7917, 3916, 3479, 84447, 10891, 51125, 10574, 5216, 6789, 22848, 64321, 5071, 481, 1191, 3329, 1029, 3009, 2597, 3920, 2319, 7341, 5245, 79594, 10437, 6608, 335, 811, 5479, 5371, 5295, 4088, 7874, 9099, 5728, 3304, 3303, 11331, 6812, 51512, 6659	3590	136	16396	1.64551	0.849969	0.00488781	0.00452508
GOTERM_CC_DIRECT	GO:0012507~ER to Golgi transport vesicle membrane	23	0.616126	0.000230433	6396, 22937, 6720, 7039, 3123, 3133, 254263, 374, 3119, 3107, 3106, 3117, 3105, 972, 3115, 3126, 3125, 567, 3113, 10959, 3135, 6721, 966	3662	51	17735	2.18409	0.228916	0.00440556	0.00403843
GOTERM_MF_DIRECT	GO:0005080~protein kinase C binding	22	0.589338	0.000232758	7153, 9463, 114609, 7155, 25, 5341, 9734, 59341, 4082, 3094, 552, 3315, 51564, 3685, 207, 5579, 6427, 8878, 3667, 6714, 10014, 10611	3557	46	16472	2.21476	0.440158	0.00725331	0.00691582
GOTERM_BP_DIRECT	GO:0051592~response to calcium ion	26	0.696491	0.000239284	808, 595, 310, 2664, 2244, 2266, 339, 7139, 857, 4547, 1956, 6529, 7057, 9536, 2243, 2185, 360, 7273, 6382, 4519, 1843, 3569, 10628, 6678, 5027, 801	3590	58	16396	2.04733	0.864169	0.00513076	0.00475
GOTERM_BP_DIRECT	GO:0043388~positive regulation of DNA binding	16	0.42861	0.000242203	808, 3280, 22933, 6497, 3662, 5071, 7295, 3717, 4609, 3479, 1950, 3146, 801, 10155, 5329, 4318	3590	28	16396	2.60979	0.867437	0.00514049	0.004759
GOTERM_BP_DIRECT	GO:0043392~negative regulation of DNA binding	16	0.42861	0.000242203	7341, 7023, 4792, 4751, 3398, 3001, 3066, 8091, 23028, 3162, 6608, 3717, 51176, 51773, 1869, 3725	3590	28	16396	2.60979	0.867437	0.00514049	0.004759
GOTERM_BP_DIRECT	GO:2000145~regulation of cell motility	16	0.42861	0.000242203	9475, 25, 27, 5894, 2066, 1021, 2064, 6093, 3084, 1613, 387, 1950, 2069, 975, 1729, 1956	3590	28	16396	2.60979	0.867437	0.00514049	0.004759
GOTERM_BP_DIRECT	GO:0009314~response to radiation	16	0.42861	0.000242203	50848, 8243, 6387, 6356, 1281, 7295, 285, 3726, 4914, 3727, 596, 1233, 4204, 4986, 4988, 3725	3590	28	16396	2.60979	0.867437	0.00514049	0.004759
GOTERM_BP_DIRECT	GO:0007411~axon guidance	55	1.47335	0.000246279	8013, 91653, 8851, 4893, 7080, 1385, 729920, 7042, 6708, 2625, 10417, 5818, 6900, 3799, 5594, 5595, 1942, 10505, 6710, 1948, 1947, 1946, 5747, 3845, 8399, 9048, 6654, 170302, 55740, 1436, 2048, 655, 3730, 8828, 5879, 8829, 9378, 89780, 64221, 7430, 7474, 9211, 6586, 6387, 4089, 4684, 23114, 4914, 2534, 3908, 1002, 2817, 627, 5649, 2736	3590	158	16396	1.58982	0.871871	0.00521375	0.00482683
GOTERM_BP_DIRECT	GO:0030214~hyaluronan catabolic process	11	0.294669	0.000249597	960, 2247, 11261, 2990, 6548, 3373, 7040, 8372, 8692, 10894, 3073	3590	15	16396	3.34923	0.875369	0.00523088	0.00484269
GOTERM_BP_DIRECT	GO:0032270~positive regulation of cellular protein metabolic process	11	0.294669	0.000249597	8399, 3624, 1435, 4792, 9314, 3630, 9370, 207, 7040, 183, 185	3590	15	16396	3.34923	0.875369	0.00523088	0.00484269
GOTERM_BP_DIRECT	GO:0045582~positive regulation of T cell differentiation	11	0.294669	0.000249597	2625, 7494, 3559, 8808, 972, 27177, 3565, 3574, 7535, 3592, 939	3590	15	16396	3.34923	0.875369	0.00523088	0.00484269
GOTERM_BP_DIRECT	GO:2000310~regulation of N-methyl-D-aspartate selective glutamate receptor activity	11	0.294669	0.000249597	9378, 54413, 10891, 23542, 22871, 254263, 2185, 1392, 4988, 4208, 5649	3590	15	16396	3.34923	0.875369	0.00523088	0.00484269
GOTERM_BP_DIRECT	GO:1902895~positive regulation of pri-miRNA transcription from RNA polymerase II promoter	13	0.348245	0.000250987	3091, 5155, 6597, 7015, 4088, 5970, 6774, 2353, 7040, 650, 652, 6688, 3725	3590	20	16396	2.96864	0.876806	0.00523371	0.00484531
GOTERM_BP_DIRECT	GO:0042326~negative regulation of phosphorylation	13	0.348245	0.000250987	8655, 1032, 1030, 23411, 197, 1029, 1028, 3624, 1027, 3623, 652, 399, 655	3590	20	16396	2.96864	0.876806	0.00523371	0.00484531
GOTERM_BP_DIRECT	GO:0060548~negative regulation of cell death	25	0.669703	0.000252768	8678, 4255, 5587, 7481, 56852, 4609, 652, 2247, 655, 27243, 4864, 10551, 7274, 9474, 4089, 1471, 1392, 5071, 1490, 3491, 3304, 3303, 6659, 4856, 8838	3590	55	16396	2.07597	0.878623	0.00525769	0.00486751
GOTERM_CC_DIRECT	GO:0043231~intracellular membrane-bounded organelle	150	4.01822	0.000262401	4172, 5420, 3002, 1581, 81603, 22994, 7161, 3480, 351, 5818, 1215, 476, 1576, 1730, 479, 5810, 5536, 4208, 9619, 8540, 8021, 8140, 121665, 366, 2312, 23054, 4973, 3643, 406, 6877, 1508, 4856, 2956, 6097, 24, 5444, 261726, 495, 57007, 26097, 2962, 2720, 412, 259, 57521, 535, 11201, 6888, 51426, 10479, 9015, 64581, 8842, 2580, 1490, 1522, 1520, 942, 3267, 10241, 5447, 3667, 706, 4758, 949, 5727, 91…	3662	557	17735	1.30421	0.256233	0.00487104	0.00446512
GOTERM_CC_DIRECT	GO:0031362~anchored component of external side of plasma membrane	13	0.348245	0.000263416	929, 728441, 2681, 2350, 7070, 728226, 8692, 92086, 2811, 2678, 762, 966, 1946	3662	21	17735	2.99804	0.257084	0.00487104	0.00446512
GOTERM_BP_DIRECT	GO:0071333~cellular response to glucose stimulus	24	0.642915	0.000265279	2081, 50507, 7494, 5076, 6770, 4221, 7082, 1581, 5290, 3383, 5906, 1215, 2852, 10804, 2621, 2730, 10891, 5566, 2729, 6659, 4208, 2626, 3956, 2901	3590	52	16396	2.10791	0.890656	0.00550422	0.00509574
GOTERM_BP_DIRECT	GO:0001932~regulation of protein phosphorylation	18	0.482186	0.000281508	8651, 5371, 6773, 4067, 6871, 3364, 9021, 22863, 51284, 2335, 335, 2146, 51311, 55704, 5888, 407, 5747, 4724	3590	34	16396	2.41789	0.904504	0.00582644	0.00539405
GOTERM_BP_DIRECT	GO:0000186~activation of MAPKK activity	22	0.589338	0.000285118	7046, 4342, 5894, 5663, 9020, 4914, 1326, 673, 3717, 5906, 2149, 652, 2247, 1950, 1398, 120892, 5610, 4217, 1956, 9607, 4803, 4616	3590	46	16396	2.18428	0.907338	0.00587202	0.00543625
GOTERM_BP_DIRECT	GO:0030900~forebrain development	22	0.589338	0.000285118	9201, 8289, 5592, 7155, 4036, 7080, 3340, 6491, 351, 145258, 2534, 1267, 546, 10891, 4851, 50674, 317, 6657, 4854, 1869, 6714, 29072	3590	46	16396	2.18428	0.907338	0.00587202	0.00543625
GOTERM_BP_DIRECT	GO:0034605~cellular response to heat	19	0.508974	0.00029025	7341, 7057, 7442, 4067, 4287, 4288, 3552, 59341, 3297, 3066, 3162, 10569, 3304, 3303, 56892, 2246, 4763, 3654, 3627	3590	37	16396	2.34528	0.911222	0.00594834	0.0055069
GOTERM_BP_DIRECT	GO:0045597~positive regulation of cell differentiation	19	0.508974	0.00029025	8320, 64321, 4771, 5345, 2690, 9021, 1490, 3491, 6195, 3726, 2668, 3727, 3717, 367, 1045, 3630, 3642, 6657, 3725	3590	37	16396	2.34528	0.911222	0.00594834	0.0055069
GOTERM_BP_DIRECT	GO:0006461~protein complex assembly	43	1.15189	0.000292736	3280, 7189, 6892, 7023, 4297, 100506658, 8557, 2176, 2175, 3560, 4193, 891, 355, 26471, 972, 10891, 119, 3996, 958, 916, 917, 5371, 5595, 4286, 6662, 7157, 8301, 4146, 2243, 3077, 2185, 2039, 983, 23195, 324, 2058, 1387, 6513, 8935, 11136, 7429, 8518, 8936	3590	116	16396	1.69299	0.913045	0.00596197	0.00551952
GOTERM_BP_DIRECT	GO:0010508~positive regulation of autophagy	20	0.535762	0.000293059	7494, 5562, 8678, 6794, 4210, 5563, 81603, 22863, 148022, 1634, 10769, 3458, 53373, 58476, 120892, 7942, 6737, 8408, 10533, 10346	3590	40	16396	2.28357	0.913279	0.00596197	0.00551952
GOTERM_BP_DIRECT	GO:0030218~erythrocyte differentiation	20	0.535762	0.000293059	7067, 6223, 4067, 2056, 2034, 161882, 2625, 3815, 3717, 3624, 2623, 3623, 652, 103, 3313, 118, 6688, 836, 10320, 6208	3590	40	16396	2.28357	0.913279	0.00596197	0.00551952
GOTERM_BP_DIRECT	GO:0060395~SMAD protein signal transduction	27	0.723279	0.000307931	6497, 4012, 2353, 7040, 7042, 174, 650, 6927, 652, 655, 2662, 9518, 4920, 10432, 8200, 7431, 9573, 4087, 4088, 4089, 6862, 3172, 4838, 3624, 3623, 649, 3725	3590	62	16396	1.98891	0.9234	0.00624928	0.00578551
GOTERM_MF_DIRECT	GO:0004888~transmembrane signaling receptor activity	68	1.82159	0.000308106	9466, 7442, 1380, 55366, 51284, 355, 2740, 3554, 92737, 6504, 3953, 51206, 10894, 915, 10333, 916, 917, 7099, 919, 7098, 7056, 9436, 6401, 7097, 7096, 3805, 10507, 920, 921, 9902, 969, 4074, 7100, 4352, 5364, 3383, 391107, 391109, 177, 6608, 29121, 973, 974, 81399, 4864, 51348, 10871, 1956, 939, 27181, 4360, 9378, 8685, 9213, 2022, 2064, 3902, 2213, 2532, 1365, 943, 10682, 55558, 54106, 3820, 382…	3557	210	16472	1.49952	0.536022	0.00948282	0.00904158
GOTERM_BP_DIRECT	GO:0010468~regulation of gene expression	38	1.01795	0.000320813	5460, 7046, 6892, 10194, 5741, 257101, 253260, 1021, 7161, 196, 1019, 2668, 596, 4609, 3479, 2147, 8846, 4763, 10332, 3091, 1396, 3574, 26227, 5290, 481, 64428, 1788, 1544, 2796, 1201, 3586, 348, 79923, 3642, 5744, 6657, 4856, 2538	3590	99	16396	1.75304	0.931207	0.00649492	0.00601292
GOTERM_MF_DIRECT	GO:0008233~peptidase activity	35	0.937584	0.000334076	5045, 5046, 5641, 5125, 431705, 23621, 351, 175, 6590, 1512, 1511, 2346, 1991, 836, 10875, 9476, 11093, 5650, 25818, 9159, 6687, 5972, 43849, 81502, 10747, 3249, 841, 566, 842, 117159, 5104, 9407, 649, 1508, 5648	3557	90	16472	1.80089	0.565108	0.0101567	0.00968413
GOTERM_BP_DIRECT	GO:0010288~response to lead ion	10	0.267881	0.000342203	1019, 1788, 6770, 5741, 6678, 5536, 1371, 847, 6529, 351	3590	13	16396	3.51318	0.942453	0.00686134	0.00635215
GOTERM_BP_DIRECT	GO:0060334~regulation of interferon-gamma-mediated signaling pathway	10	0.267881	0.000342203	8651, 7341, 3716, 3459, 3717, 3458, 6772, 8554, 3460, 9021	3590	13	16396	3.51318	0.942453	0.00686134	0.00635215
GOTERM_BP_DIRECT	GO:0043518~negative regulation of DNA damage response, signal transduction by p53 class mediator	10	0.267881	0.000342203	4282, 960, 972, 7291, 23411, 1859, 23028, 6615, 6591, 4193	3590	13	16396	3.51318	0.942453	0.00686134	0.00635215
GOTERM_BP_DIRECT	GO:0051770~positive regulation of nitric-oxide synthase biosynthetic process	10	0.267881	0.000342203	7099, 5608, 3717, 6364, 3791, 6347, 64127, 54106, 7097, 2208	3590	13	16396	3.51318	0.942453	0.00686134	0.00635215
GOTERM_BP_DIRECT	GO:0050680~negative regulation of epithelial cell proliferation	25	0.669703	0.000351374	9104, 1021, 7040, 7042, 652, 2069, 3851, 4208, 8200, 11171, 7474, 6662, 4221, 2263, 1030, 5728, 1028, 3249, 367, 864, 1386, 5467, 6657, 5727, 5925	3590	56	16396	2.0389	0.946692	0.00702832	0.00650674
GOTERM_BP_DIRECT	GO:0031018~endocrine pancreas development	15	0.401822	0.000364252	3170, 5991, 6662, 3570, 9451, 6928, 6927, 3569, 301, 578, 2695, 207, 50674, 3642, 6659	3590	26	16396	2.63488	0.952124	0.00719463	0.0066607
GOTERM_BP_DIRECT	GO:0032148~activation of protein kinase B activity	15	0.401822	0.000364252	7474, 5155, 151, 283, 3084, 7295, 5590, 3479, 2621, 2246, 3630, 55704, 3643, 6714, 3606	3590	26	16396	2.63488	0.952124	0.00719463	0.0066607
GOTERM_BP_DIRECT	GO:0002053~positive regulation of mesenchymal cell proliferation	15	0.401822	0.000364252	4041, 5154, 7474, 7422, 6662, 6772, 2254, 2263, 2260, 6608, 4609, 1499, 8626, 6899, 4613	3590	26	16396	2.63488	0.952124	0.00719463	0.0066607
GOTERM_CC_DIRECT	GO:0043204~perikaryon	38	1.01795	0.000364958	22933, 5066, 7226, 9148, 1020, 57463, 199, 3458, 2521, 146713, 2026, 632, 6347, 5798, 10013, 5536, 2806, 4986, 4988, 1813, 4923, 6606, 2901, 3736, 5594, 729230, 3672, 5499, 7150, 1392, 55273, 1269, 2796, 120892, 26047, 5126, 7349, 113451	3662	105	17735	1.7527	0.337509	0.00663989	0.00608657
GOTERM_MF_DIRECT	GO:0070491~repressing transcription factor binding	18	0.482186	0.000367107	6497, 9734, 266740, 5970, 3087, 3065, 10524, 6908, 4609, 1499, 1487, 51564, 3146, 9759, 406, 10014, 6717, 1977	3557	35	16472	2.38159	0.599482	0.0110265	0.0105134
GOTERM_BP_DIRECT	GO:0033189~response to vitamin A	12	0.321457	0.000367451	1788, 7298, 1543, 3992, 2056, 57817, 5467, 5468, 847, 383, 2626, 5914	3590	18	16396	3.04475	0.953385	0.00719463	0.0066607
GOTERM_BP_DIRECT	GO:0051412~response to corticosterone	12	0.321457	0.000367451	808, 595, 7200, 552, 6770, 114131, 2354, 2353, 801, 8061, 1392, 4747	3590	18	16396	3.04475	0.953385	0.00719463	0.0066607
GOTERM_BP_DIRECT	GO:0001935~endothelial cell proliferation	12	0.321457	0.000367451	2081, 7010, 7494, 796, 335, 3146, 4323, 51378, 659, 947, 3162, 949	3590	18	16396	3.04475	0.953385	0.00719463	0.0066607
GOTERM_BP_DIRECT	GO:0030500~regulation of bone mineralization	12	0.321457	0.000367451	4077, 55589, 632, 55787, 5167, 4256, 4146, 1594, 7291, 2185, 1901, 197	3590	18	16396	3.04475	0.953385	0.00719463	0.0066607
GOTERM_BP_DIRECT	GO:0043691~reverse cholesterol transport	12	0.321457	0.000367451	6927, 345, 3990, 335, 336, 348, 19, 3931, 55937, 949, 9619, 1191	3590	18	16396	3.04475	0.953385	0.00719463	0.0066607
GOTERM_BP_DIRECT	GO:0034142~toll-like receptor 4 signaling pathway	12	0.321457	0.000367451	929, 7099, 114609, 4792, 79931, 3929, 3684, 3654, 8767, 3689, 23643, 3965	3590	18	16396	3.04475	0.953385	0.00719463	0.0066607
GOTERM_CC_DIRECT	GO:0030666~endocytic vesicle membrane	27	0.723279	0.000377876	9463, 4035, 3123, 4193, 6608, 3119, 3117, 972, 3115, 3113, 7316, 857, 815, 4846, 818, 8685, 89780, 7474, 9332, 7311, 1173, 3126, 3125, 948, 949, 5727, 928	3662	66	17735	1.98122	0.347096	0.00676578	0.00620197
GOTERM_BP_DIRECT	GO:0007420~brain development	63	1.68765	0.000380978	5781, 5463, 7520, 8851, 9148, 7080, 472, 10018, 7917, 355, 675, 2302, 4763, 83992, 5414, 637, 10058, 4724, 5591, 4221, 1152, 1471, 3925, 2356, 23054, 26047, 80279, 2475, 5469, 409, 1901, 928, 2290, 9001, 23705, 6770, 29, 2296, 3021, 22931, 57526, 10716, 578, 613, 659, 140733, 939, 8320, 38, 3397, 26227, 186, 54541, 4838, 55755, 2334, 347, 6414, 10763, 5649, 5209, 56848, 5727	3590	190	16396	1.51436	0.958361	0.00744201	0.00688973
GOTERM_BP_DIRECT	GO:0038061~NIK/NF-kappaB signaling	28	0.750067	0.00038469	9861, 9641, 4790, 4791, 9020, 330, 5718, 5719, 238, 5698, 7316, 5710, 10197, 5711, 5713, 5714, 7311, 5971, 5531, 5707, 23291, 5708, 5709, 1147, 5721, 5688, 5700, 11035	3590	66	16396	1.93757	0.959631	0.00749695	0.00694059
GOTERM_BP_DIRECT	GO:0048008~platelet-derived growth factor receptor signaling pathway	16	0.42861	0.000400597	9564, 5154, 5286, 5781, 5155, 5156, 64651, 5728, 3717, 10628, 613, 5159, 8879, 5327, 6714, 8829	3590	29	16396	2.5198	0.96465	0.00775263	0.00717729
GOTERM_BP_DIRECT	GO:0042149~cellular response to glucose starvation	16	0.42861	0.000400597	7494, 9463, 4780, 7378, 5562, 8678, 7157, 5563, 5289, 5366, 9451, 22863, 596, 468, 6513, 3309	3590	29	16396	2.5198	0.96465	0.00775263	0.00717729
GOTERM_BP_DIRECT	GO:0002474~antigen processing and presentation of peptide antigen via MHC class I	16	0.42861	0.000400597	6890, 6892, 6396, 64167, 3133, 3077, 3119, 3107, 3106, 3105, 567, 821, 3135, 811, 51752, 1636	3590	29	16396	2.5198	0.96465	0.00775263	0.00717729
GOTERM_MF_DIRECT	GO:0043560~insulin receptor substrate binding	9	0.241093	0.000409621	5580, 5295, 3717, 5781, 3643, 5290, 3645, 3480, 5590	3557	11	16472	3.78889	0.63976	0.012157	0.0115913
GOTERM_CC_DIRECT	GO:0031528~microvillus membrane	12	0.321457	0.000410738	3690, 7430, 6286, 8842, 1499, 5420, 3685, 768, 4478, 4547, 10630, 949	3662	19	17735	3.05873	0.370864	0.00712994	0.00653578
GOTERM_CC_DIRECT	GO:0043005~neuron projection	72	1.92874	0.000410856	9463, 6275, 6198, 5066, 4771, 4133, 4134, 2353, 3320, 6271, 2821, 673, 355, 2664, 1453, 998, 10178, 5216, 2904, 2902, 10611, 5792, 5872, 8061, 5071, 680, 3925, 5906, 64919, 23294, 841, 30011, 120892, 5743, 140767, 2915, 6714, 23705, 6770, 4352, 6531, 7226, 6532, 2693, 3065, 23426, 3458, 10519, 538, 4986, 4988, 10677, 6529, 6804, 939, 6606, 7431, 3672, 11251, 114757, 383, 5728, 1525, 1524, 1600, 1…	3662	237	17735	1.47129	0.370948	0.00712994	0.00653578
GOTERM_BP_DIRECT	GO:0042220~response to cocaine	17	0.455398	0.000424108	5020, 6531, 3320, 3066, 2185, 4193, 3329, 6609, 1788, 3359, 1268, 23284, 2475, 4988, 10014, 1813, 6529	3590	32	16396	2.42629	0.970948	0.00816971	0.00756342
GOTERM_BP_DIRECT	GO:0051402~neuron apoptotic process	17	0.455398	0.000424108	5663, 1020, 22861, 9131, 581, 472, 351, 1822, 27242, 596, 598, 2597, 8626, 317, 637, 56616, 5925	3590	32	16396	2.42629	0.970948	0.00816971	0.00756342
GOTERM_BP_DIRECT	GO:0051209~release of sequestered calcium ion into cytosol	20	0.535762	0.000434898	5581, 6375, 7442, 219931, 6366, 7226, 5311, 3354, 57192, 25998, 2149, 1236, 53373, 2247, 27113, 5027, 5788, 1649, 3932, 1813	3590	41	16396	2.22787	0.973449	0.00834898	0.00772938
GOTERM_BP_DIRECT	GO:0031648~protein destabilization	18	0.482186	0.000436417	5591, 7494, 64321, 3397, 23411, 5071, 4193, 79594, 1029, 650, 23291, 1512, 29116, 6622, 6737, 51548, 6714, 2934	3590	35	16396	2.34881	0.973784	0.00834898	0.00772938
GOTERM_BP_DIRECT	GO:0072593~reactive oxygen species metabolic process	18	0.482186	0.000436417	50507, 6441, 5076, 5155, 5166, 5366, 2053, 29949, 1490, 3491, 54541, 596, 120892, 27244, 5027, 316, 6647, 4724	3590	35	16396	2.34881	0.973784	0.00834898	0.00772938
GOTERM_BP_DIRECT	GO:0018107~peptidyl-threonine phosphorylation	19	0.508974	0.000439398	5580, 7046, 5594, 6872, 130497, 8851, 2011, 1020, 1195, 2932, 596, 983, 120892, 2475, 5566, 5599, 207, 8658, 1859	3590	38	16396	2.28357	0.974428	0.00838677	0.00776438
GOTERM_BP_DIRECT	GO:2000773~negative regulation of cellular senescence	9	0.241093	0.000453197	5591, 25, 7015, 7014, 8626, 1021, 7291, 604, 23411	3590	11	16396	3.73674	0.97721	0.00849464	0.00786424
GOTERM_BP_DIRECT	GO:0016064~immunoglobulin mediated immune response	9	0.241093	0.000453197	5580, 972, 3566, 51311, 3665, 3635, 4615, 8915, 939	3590	11	16396	3.73674	0.97721	0.00849464	0.00786424
GOTERM_BP_DIRECT	GO:0032495~response to muramyl dipeptide	9	0.241093	0.000453197	4792, 5970, 1432, 4851, 3663, 7128, 64127, 182, 22861	3590	11	16396	3.73674	0.97721	0.00849464	0.00786424
GOTERM_BP_DIRECT	GO:0033197~response to vitamin E	9	0.241093	0.000453197	595, 100, 8678, 6427, 3952, 847, 4208, 2281, 383	3590	11	16396	3.73674	0.97721	0.00849464	0.00786424
GOTERM_BP_DIRECT	GO:0050707~regulation of cytokine secretion	9	0.241093	0.000453197	8651, 7099, 7100, 4067, 51311, 54106, 10333, 7097, 7096	3590	11	16396	3.73674	0.97721	0.00849464	0.00786424
GOTERM_BP_DIRECT	GO:0034374~low-density lipoprotein particle remodeling	9	0.241093	0.000453197	5320, 4353, 3990, 336, 348, 338, 183, 185, 9619	3590	11	16396	3.73674	0.97721	0.00849464	0.00786424
GOTERM_BP_DIRECT	GO:0002523~leukocyte migration involved in inflammatory response	9	0.241093	0.000453197	5473, 1235, 6376, 6401, 1991, 6279, 6347, 3689, 6280	3590	11	16396	3.73674	0.97721	0.00849464	0.00786424
GOTERM_BP_DIRECT	GO:0042511~positive regulation of tyrosine phosphorylation of Stat1 protein	9	0.241093	0.000453197	7132, 8784, 3815, 3458, 59067, 3572, 3263, 958, 3976	3590	11	16396	3.73674	0.97721	0.00849464	0.00786424
GOTERM_CC_DIRECT	GO:0005635~nuclear envelope	52	1.39298	0.000460437	6396, 129401, 90523, 5422, 1063, 1536, 3837, 310, 4928, 1773, 27243, 7514, 5733, 10456, 6240, 5595, 22926, 6720, 23411, 240, 5590, 241, 51493, 57113, 1861, 55379, 170392, 7329, 11277, 80351, 5903, 5880, 7301, 27348, 23345, 6249, 4864, 55746, 3930, 23636, 10280, 4000, 7356, 23511, 8480, 79023, 581, 142, 10966, 2852, 79902, 10682	3662	159	17735	1.58387	0.405178	0.00779531	0.0071457
GOTERM_CC_DIRECT	GO:0005770~late endosome	42	1.1251	0.000464022	4074, 4077, 5641, 5289, 23621, 3482, 9482, 3916, 2149, 100287171, 3454, 7018, 7879, 55823, 538, 55745, 913, 255738, 1318, 10479, 7274, 5594, 5595, 9711, 7852, 5873, 7251, 4914, 5906, 3949, 79589, 1201, 51652, 84557, 201294, 56829, 8878, 3920, 5604, 1649, 6714, 57617	3662	121	17735	1.68104	0.407579	0.00779531	0.0071457
GOTERM_BP_DIRECT	GO:0030855~epithelial cell differentiation	29	0.776855	0.000468791	50848, 6495, 7422, 373156, 1066, 1755, 3958, 310, 873, 655, 3851, 50674, 11005, 839, 1999, 5230, 4582, 5111, 2263, 1646, 1645, 983, 3861, 6876, 5468, 1508, 6899, 7429, 3921	3590	70	16396	1.8921	0.979991	0.00871519	0.00806842
GOTERM_BP_DIRECT	GO:0038096~Fc-gamma receptor signaling pathway involved in phagocytosis	29	0.776855	0.000468791	5580, 5581, 25, 6850, 10095, 3320, 1398, 998, 71, 5879, 2209, 917, 919, 5295, 5594, 5595, 4067, 5058, 64005, 10163, 3055, 5290, 2534, 2214, 2212, 60, 5747, 6714, 10787	3590	70	16396	1.8921	0.979991	0.00871519	0.00806842
GOTERM_BP_DIRECT	GO:2000378~negative regulation of reactive oxygen species metabolic process	13	0.348245	0.000469143	22933, 3091, 5076, 23408, 8678, 23410, 5071, 7020, 672, 596, 26574, 4613, 2539	3590	21	16396	2.82727	0.98005	0.00871519	0.00806842
GOTERM_BP_DIRECT	GO:0006471~protein ADP-ribosylation	13	0.348245	0.000469143	22933, 23408, 23409, 23410, 23411, 142, 143, 84875, 417, 8658, 51548, 80351, 10038	3590	21	16396	2.82727	0.98005	0.00871519	0.00806842
GOTERM_CC_DIRECT	GO:0030424~axon	68	1.82159	0.00046993	23405, 5064, 8851, 5663, 1385, 1020, 57463, 7040, 26119, 7042, 351, 6708, 27242, 5818, 3359, 127933, 23284, 4763, 6622, 10013, 133396, 3996, 8927, 1813, 5979, 5594, 5796, 1471, 760, 1268, 720, 23098, 120892, 26047, 721, 4137, 113451, 55811, 4975, 10300, 5868, 4856, 6531, 6772, 4311, 23621, 79594, 2566, 2048, 214, 10519, 8828, 8829, 4747, 10677, 6529, 34, 64221, 5058, 6863, 2185, 79784, 4914, 1644…	3662	222	17735	1.48344	0.411516	0.00779531	0.0071457
GOTERM_MF_DIRECT	GO:0005123~death receptor binding	11	0.294669	0.000475062	1896, 356, 8996, 8567, 841, 55367, 8737, 637, 836, 8837, 4615	3557	16	16472	3.18372	0.693989	0.0138174	0.0131745
GOTERM_MF_DIRECT	GO:0097110~scaffold protein binding	22	0.589338	0.000476653	7431, 6331, 5595, 28514, 24145, 3551, 22871, 22861, 4193, 54210, 54413, 1147, 841, 4842, 3852, 3875, 858, 6714, 3757, 4846, 3856, 54209	3557	48	16472	2.12248	0.695201	0.0138174	0.0131745
GOTERM_MF_DIRECT	GO:0003725~double-stranded RNA binding	26	0.696491	0.000485459	23405, 9188, 64135, 4154, 170506, 23586, 79132, 51284, 1653, 29102, 5610, 4940, 10376, 7098, 7431, 6520, 7037, 3329, 4938, 4939, 104, 51311, 3146, 8638, 4478, 87	3557	61	16472	1.97381	0.70182	0.0139109	0.0132636
GOTERM_BP_DIRECT	GO:0006367~transcription initiation from RNA polymerase II promoter	52	1.39298	0.000494896	8013, 6872, 5465, 6874, 1022, 3164, 6908, 10891, 2908, 10413, 5430, 5431, 3172, 367, 1025, 1024, 23054, 1387, 5467, 4851, 5468, 11036, 5469, 8856, 6877, 4854, 2959, 2516, 8431, 6097, 5241, 7067, 5441, 6256, 7421, 2099, 2966, 5916, 2963, 2962, 54457, 2960, 1871, 1870, 10155, 4306, 6925, 5914, 9970, 2100, 1490, 4878	3590	151	16396	1.57279	0.983908	0.00917318	0.00849242
GOTERM_BP_DIRECT	GO:0001843~neural tube closure	31	0.830431	0.000508664	6692, 7189, 6497, 7248, 7040, 9241, 7042, 6491, 133, 5916, 57822, 652, 57167, 10959, 317, 5216, 6768, 5914, 8289, 5076, 6862, 7291, 11019, 80199, 5566, 7249, 7403, 5567, 29072, 8915, 5727	3590	77	16396	1.83872	0.985655	0.00940746	0.00870931
GOTERM_MF_DIRECT	GO:0004126~cytidine deaminase activity	8	0.214305	0.000515977	60489, 57379, 164668, 200315, 339, 978, 200316, 10930	3557	9	16472	4.11633	0.723666	0.0145905	0.0139116
GOTERM_MF_DIRECT	GO:0051879~Hsp90 protein binding	15	0.401822	0.000520879	2081, 23636, 6188, 3091, 3791, 64127, 9451, 196, 3837, 1457, 2633, 55869, 406, 10013, 4678	3557	27	16472	2.5727	0.727023	0.0145905	0.0139116
GOTERM_MF_DIRECT	GO:0048306~calcium-dependent protein binding	25	0.669703	0.000528675	6275, 4153, 11261, 6271, 1755, 310, 1655, 6403, 6548, 10332, 10015, 6804, 6285, 9378, 6286, 7137, 2220, 7251, 2, 79720, 10747, 301, 302, 306, 5648	3557	58	16472	1.99606	0.732278	0.0146443	0.0139629
GOTERM_BP_DIRECT	GO:0048011~neurotrophin TRK receptor signaling pathway	11	0.294669	0.000534855	4914, 9564, 54541, 9001, 5781, 84335, 5894, 6654, 836, 6714, 4803	3590	16	16396	3.1399	0.988472	0.00984818	0.00911733
GOTERM_BP_DIRECT	GO:0016486~peptide hormone processing	11	0.294669	0.000534855	25825, 27344, 5122, 5045, 5046, 5443, 9159, 5125, 3972, 1889, 1081	3590	16	16396	3.1399	0.988472	0.00984818	0.00911733
GOTERM_CC_DIRECT	GO:0005902~microvillus	24	0.642915	0.000540041	7010, 5154, 7430, 64005, 6555, 7412, 2694, 7040, 83715, 8692, 284, 362, 760, 1267, 1179, 3169, 523, 120892, 4478, 6624, 10411, 7429, 8639, 257629	3662	57	17735	2.03915	0.456286	0.0088285	0.0080928
GOTERM_BP_DIRECT	GO:0034341~response to interferon-gamma	14	0.375033	0.000548518	4261, 58191, 4210, 10581, 1594, 169026, 684, 10537, 942, 10241, 6622, 6737, 10410, 8519	3590	24	16396	2.66416	0.989714	0.0100775	0.00932964
GOTERM_BP_DIRECT	GO:0032436~positive regulation of proteasomal ubiquitin-dependent protein catabolic process	27	0.723279	0.000556631	7341, 6790, 22933, 8078, 6872, 5663, 8554, 25820, 4092, 4193, 57761, 1453, 7415, 2729, 9817, 5071, 1050, 25898, 1191, 2932, 10769, 3303, 863, 120892, 207, 90865, 6613	3590	64	16396	1.92676	0.990388	0.010199	0.00944215
GOTERM_BP_DIRECT	GO:0048012~hepatocyte growth factor receptor signaling pathway	8	0.214305	0.000564915	3082, 9564, 22933, 3249, 4485, 4486, 4233, 8829	3590	9	16396	4.05967	0.99103	0.010199	0.00944215
GOTERM_BP_DIRECT	GO:0035456~response to interferon-beta	8	0.214305	0.000564915	9641, 684, 6772, 10581, 3455, 54739, 10410, 8519	3590	9	16396	4.05967	0.99103	0.010199	0.00944215
GOTERM_BP_DIRECT	GO:0042158~lipoprotein biosynthetic process	8	0.214305	0.000564915	5034, 335, 336, 348, 338, 339, 4547, 3931	3590	9	16396	4.05967	0.99103	0.010199	0.00944215
GOTERM_BP_DIRECT	GO:0048245~eosinophil chemotaxis	8	0.214305	0.000564915	3958, 6352, 6354, 3269, 6357, 6356, 6348, 6369	3590	9	16396	4.05967	0.99103	0.010199	0.00944215
GOTERM_BP_DIRECT	GO:0010863~positive regulation of phospholipase C activity	8	0.214305	0.000564915	3815, 2247, 5156, 27, 2321, 5159, 2099, 2260	3590	9	16396	4.05967	0.99103	0.010199	0.00944215
GOTERM_BP_DIRECT	GO:0035767~endothelial cell chemotaxis	8	0.214305	0.000564915	57449, 7422, 1960, 5872, 3146, 3164, 4856, 8829	3590	9	16396	4.05967	0.99103	0.010199	0.00944215
GOTERM_BP_DIRECT	GO:0035457~cellular response to interferon-alpha	8	0.214305	0.000564915	2625, 4938, 3437, 6770, 2621, 3433, 3454, 558	3590	9	16396	4.05967	0.99103	0.010199	0.00944215
GOTERM_MF_DIRECT	GO:0000980~RNA polymerase II distal enhancer sequence-specific DNA binding	27	0.723279	0.000590203	4790, 6597, 4772, 6598, 1385, 3066, 3021, 3065, 9242, 3183, 170302, 2624, 3215, 6688, 4841, 9219, 4208, 4780, 5970, 6862, 1045, 1386, 60, 83881, 7704, 3725, 2516	3557	65	16472	1.92359	0.770355	0.016169	0.0154166
GOTERM_BP_DIRECT	GO:0009967~positive regulation of signal transduction	26	0.696491	0.000604158	8631, 8412, 5741, 9402, 26119, 2625, 29760, 126669, 1398, 84941, 10013, 6503, 27040, 50618, 4068, 9479, 8027, 10140, 9370, 83939, 79368, 1124, 941, 10044, 8935, 10045	3590	61	16396	1.94665	0.993535	0.010884	0.0100763
GOTERM_CC_DIRECT	GO:0032587~ruffle membrane	31	0.830431	0.000621573	5141, 6792, 5341, 114609, 4771, 59341, 3320, 23586, 199, 117145, 57026, 26751, 10519, 8844, 1915, 3678, 10630, 6868, 5879, 3690, 6188, 7430, 5058, 660, 324, 3685, 1729, 208, 3688, 1969, 6714	3662	82	17735	1.83088	0.504086	0.0100162	0.00918152
GOTERM_BP_DIRECT	GO:1903140~regulation of establishment of endothelial barrier	7	0.187517	0.000623707	7132, 9475, 7124, 3553, 3551, 6093, 4659	3590	7	16396	4.56713	0.994509	0.0111399	0.0103132
GOTERM_BP_DIRECT	GO:0045359~positive regulation of interferon-beta biosynthetic process	7	0.187517	0.000623707	7099, 7098, 29110, 51284, 51311, 54106, 148022	3590	7	16396	4.56713	0.994509	0.0111399	0.0103132
GOTERM_BP_DIRECT	GO:0034983~peptidyl-lysine deacetylation	7	0.187517	0.000623707	22933, 23409, 9734, 9759, 23410, 10013, 23411	3590	7	16396	4.56713	0.994509	0.0111399	0.0103132
GOTERM_BP_DIRECT	GO:0071639~positive regulation of monocyte chemotactic protein-1 production	7	0.187517	0.000623707	177, 3553, 3552, 9370, 59341, 7291, 3965	3590	7	16396	4.56713	0.994509	0.0111399	0.0103132
GOTERM_BP_DIRECT	GO:0008202~steroid metabolic process	20	0.535762	0.000632549	8630, 6783, 25830, 6818, 1646, 1558, 6817, 1557, 1545, 1555, 1543, 1576, 1565, 54658, 8856, 706, 1109, 2538, 1548, 1559	3590	42	16396	2.17482	0.994899	0.0112257	0.0103926
GOTERM_BP_DIRECT	GO:0009725~response to hormone	20	0.535762	0.000632549	7077, 7275, 7076, 4151, 6652, 4067, 38, 4199, 6863, 7080, 2693, 2185, 3021, 283, 27329, 9361, 23054, 4323, 2729, 10432	3590	42	16396	2.17482	0.994899	0.0112257	0.0103926
GOTERM_BP_DIRECT	GO:0001541~ovarian follicle development	20	0.535762	0.000632549	7422, 4089, 4254, 6874, 9468, 2296, 3383, 1051, 283, 581, 3815, 3624, 596, 4609, 3623, 598, 4323, 668, 6647, 9757	3590	42	16396	2.17482	0.994899	0.0112257	0.0103926
GOTERM_BP_DIRECT	GO:0034504~protein localization to nucleus	16	0.42861	0.000639957	6495, 4000, 6135, 6662, 3087, 26108, 4193, 200576, 6608, 652, 1861, 655, 811, 7514, 54623, 7704	3590	30	16396	2.4358	0.995205	0.0113091	0.0104698
GOTERM_BP_DIRECT	GO:1900740~positive regulation of protein insertion into mitochondrial membrane involved in apoptotic signaling pathway	16	0.42861	0.000639957	8655, 7157, 5366, 7027, 3002, 7161, 10018, 596, 27113, 841, 8626, 5599, 5534, 637, 1869, 10971	3590	30	16396	2.4358	0.995205	0.0113091	0.0104698
GOTERM_BP_DIRECT	GO:0010718~positive regulation of epithelial to mesenchymal transition	17	0.455398	0.000657063	7046, 6386, 4087, 4088, 4089, 8313, 3066, 7291, 7040, 7042, 650, 1499, 51176, 2146, 4851, 6317, 6615	3590	33	16396	2.35276	0.995843	0.0115624	0.0107043
GOTERM_BP_DIRECT	GO:2001244~positive regulation of intrinsic apoptotic signaling pathway	17	0.455398	0.000657063	7157, 5366, 6279, 29949, 6280, 581, 1191, 10018, 596, 27113, 598, 51024, 5414, 857, 637, 11035, 3932	3590	33	16396	2.35276	0.995843	0.0115624	0.0107043
GOTERM_BP_DIRECT	GO:0009409~response to cold	18	0.482186	0.000659475	34, 7200, 7067, 2353, 3320, 153, 3329, 154, 133, 3569, 27344, 841, 10891, 5468, 4513, 51316, 6648, 3627	3590	36	16396	2.28357	0.995926	0.0115804	0.010721
GOTERM_MF_DIRECT	GO:0000976~transcription regulatory region sequence-specific DNA binding	22	0.589338	0.000666094	5460, 4790, 4780, 7067, 8864, 22926, 3065, 5071, 7020, 2625, 2623, 2302, 467, 7975, 4841, 406, 6657, 1958, 4778, 6659, 1649, 2516	3557	49	16472	2.07917	0.809949	0.0180497	0.0172099
GOTERM_CC_DIRECT	GO:0005791~rough endoplasmic reticulum	22	0.589338	0.000676327	7356, 5663, 5730, 27346, 3083, 351, 1536, 121665, 3329, 3759, 81502, 762, 411, 23471, 632, 821, 8626, 6347, 6622, 4547, 255738, 4924	3662	51	17735	2.08913	0.533807	0.010745	0.0098496
GOTERM_BP_DIRECT	GO:0045672~positive regulation of osteoclast differentiation	12	0.321457	0.000700298	760, 2778, 7189, 1435, 3458, 7124, 51561, 2353, 1385, 1230, 50604, 3605	3590	19	16396	2.8845	0.997103	0.0122457	0.0113369
GOTERM_BP_DIRECT	GO:0030220~platelet formation	12	0.321457	0.000700298	23218, 2623, 5781, 842, 10519, 2033, 5777, 836, 161882, 4208, 4627, 87	3590	19	16396	2.8845	0.997103	0.0122457	0.0113369
GOTERM_MF_DIRECT	GO:0004197~cysteine-type endopeptidase activity	25	0.669703	0.000710784	9100, 9101, 8078, 9986, 7345, 8975, 5641, 1514, 1513, 1512, 834, 836, 839, 8722, 7874, 1075, 9099, 9097, 1522, 841, 1520, 842, 1509, 1508, 8837	3557	59	16472	1.96223	0.829991	0.0190536	0.018167
GOTERM_CC_DIRECT	GO:0005794~Golgi apparatus	216	5.78623	0.00071689	5265, 4179, 30818, 22871, 51083, 351, 3759, 476, 2665, 2664, 1453, 51761, 57509, 3633, 9619, 11070, 8546, 4067, 8301, 19, 6480, 4852, 8658, 929, 54808, 5286, 28, 8313, 1363, 6490, 81876, 253012, 10519, 811, 4864, 4988, 3791, 91543, 5058, 5730, 81618, 56681, 1493, 2580, 1490, 10404, 9527, 948, 5604, 43, 5727, 8574, 8452, 8216, 9547, 5861, 4893, 5862, 79694, 55367, 10297, 10178, 9659, 3678, 10058, …	3662	857	17735	1.22063	0.554671	0.0112013	0.0102678
GOTERM_MF_DIRECT	GO:0043027~cysteine-type endopeptidase inhibitor activity involved in apoptotic process	13	0.348245	0.000724612	8740, 8996, 25824, 6195, 330, 551, 332, 2621, 51176, 6622, 408, 7429, 939	3557	22	16472	2.73642	0.835754	0.0192176	0.0183234
GOTERM_CC_DIRECT	GO:0034774~secretory granule lumen	9	0.241093	0.000724906	5122, 335, 2641, 5443, 2695, 5126, 3630, 1670, 7018	3662	12	17735	3.63224	0.558682	0.0112013	0.0102678
GOTERM_MF_DIRECT	GO:0000978~RNA polymerase II core promoter proximal region sequence-specific DNA binding	103	2.75917	0.000745707	8013, 6597, 30818, 6598, 3087, 7161, 10538, 3239, 6908, 4609, 2302, 50674, 9219, 10499, 639, 4208, 4582, 7294, 367, 79800, 3642, 90827, 6495, 6497, 6772, 3661, 3662, 6774, 1874, 116071, 4901, 6925, 3659, 1999, 4087, 5452, 4088, 5970, 4089, 53335, 668, 5324, 55636, 83881, 1649, 1406, 6936, 2736, 5465, 2353, 1385, 30062, 2623, 2908, 4802, 3170, 5990, 5991, 4782, 5079, 6720, 8061, 2000, 2120, 3297, …	3557	354	16472	1.3474	0.844171	0.0195689	0.0186584
GOTERM_BP_DIRECT	GO:0043547~positive regulation of GTPase activity	156	4.17894	0.000764865	6351, 6352, 6355, 6354, 9104, 6357, 6356, 8412, 8490, 3084, 2668, 2665, 2664, 2146, 6348, 6347, 3633, 3996, 6349, 10411, 6362, 6361, 6364, 5154, 5155, 5156, 6367, 23179, 139818, 6360, 2, 84315, 801, 6358, 408, 6915, 1901, 808, 50848, 6375, 9365, 64333, 8831, 6376, 6654, 29, 7984, 8313, 23268, 3383, 6370, 3815, 23263, 57522, 5159, 6369, 3655, 815, 51306, 4747, 818, 9771, 50618, 8567, 26269, 2066, …	3590	563	16396	1.26549	0.99831	0.0133266	0.0123376
GOTERM_BP_DIRECT	GO:0048009~insulin-like growth factor receptor signaling pathway	10	0.267881	0.000771698	5295, 51232, 3479, 7249, 207, 2690, 3667, 3482, 9451, 3480	3590	14	16396	3.26224	0.998404	0.0133266	0.0123376
GOTERM_BP_DIRECT	GO:0031640~killing of cells of other organism	10	0.267881	0.000771698	1668, 8542, 1113, 117159, 1671, 57817, 1670, 10578, 6283, 1669	3590	14	16396	3.26224	0.998404	0.0133266	0.0123376
GOTERM_BP_DIRECT	GO:0042311~vasodilation	10	0.267881	0.000771698	1910, 3827, 2876, 135, 3672, 348, 624, 3764, 183, 8195	3590	14	16396	3.26224	0.998404	0.0133266	0.0123376
GOTERM_BP_DIRECT	GO:0030889~negative regulation of B cell proliferation	10	0.267881	0.000771698	1029, 27242, 4067, 4332, 3586, 23495, 1493, 639, 3635, 472	3590	14	16396	3.26224	0.998404	0.0133266	0.0123376
GOTERM_BP_DIRECT	GO:0070498~interleukin-1-mediated signaling pathway	10	0.267881	0.000771698	7189, 8808, 5595, 3554, 3552, 3551, 3654, 1958, 3656, 11213	3590	14	16396	3.26224	0.998404	0.0133266	0.0123376
GOTERM_MF_DIRECT	GO:0030331~estrogen receptor binding	18	0.482186	0.000824322	7494, 5111, 11240, 142, 1655, 79447, 1499, 51176, 2521, 23054, 11331, 10891, 668, 5468, 5469, 408, 10521, 6714	3557	37	16472	2.25286	0.871915	0.0214066	0.0204106
GOTERM_BP_DIRECT	GO:0002230~positive regulation of defense response to virus by host	13	0.348245	0.000827195	5371, 9447, 340061, 29108, 23586, 3594, 200316, 60489, 10859, 51561, 3565, 115004, 57506	3590	22	16396	2.69876	0.998996	0.0141968	0.0131432
GOTERM_BP_DIRECT	GO:0010165~response to X-ray	13	0.348245	0.000827195	7056, 7157, 5366, 2067, 1161, 7161, 595, 675, 301, 8626, 5888, 836, 4436	3590	22	16396	2.69876	0.998996	0.0141968	0.0131432
GOTERM_BP_DIRECT	GO:0008037~cell recognition	13	0.348245	0.000827195	64581, 5175, 23705, 81607, 201633, 259197, 5817, 5818, 5819, 921, 4345, 3911, 10666	3590	22	16396	2.69876	0.998996	0.0141968	0.0131432
GOTERM_MF_DIRECT	GO:0004867~serine-type endopeptidase inhibitor activity	35	0.937584	0.000835728	6692, 7980, 5265, 5045, 5266, 5267, 5268, 5345, 6690, 351, 6590, 27344, 259, 710, 1992, 3730, 3699, 11005, 12, 7035, 5054, 5055, 5037, 1293, 183, 5270, 462, 2, 10406, 51232, 51156, 5104, 6317, 3700, 6318	3557	94	16472	1.72426	0.875507	0.0214791	0.0204797
GOTERM_CC_DIRECT	GO:0030425~dendrite	94	2.51808	0.000836849	23405, 7442, 5582, 8851, 30818, 2550, 3363, 22871, 1020, 57463, 127385, 3084, 6194, 1536, 551, 3916, 1137, 632, 8725, 4763, 92737, 6347, 10013, 9939, 8927, 1813, 2902, 5979, 2901, 729230, 5796, 5873, 3572, 254263, 1269, 24141, 720, 2796, 23098, 120892, 26047, 721, 2475, 4137, 113451, 55811, 5868, 4856, 4218, 196883, 7341, 8678, 6772, 4035, 4311, 342371, 25921, 23426, 84548, 3459, 773, 135, 774, 2…	3662	333	17735	1.36709	0.611072	0.0127563	0.0116933
GOTERM_MF_DIRECT	GO:0003684~damaged DNA binding	26	0.696491	0.000857322	4350, 7520, 4255, 2033, 7161, 56852, 672, 3014, 8626, 11201, 5810, 51426, 6188, 5111, 4683, 7157, 2067, 2237, 1387, 3146, 6117, 328, 5424, 5887, 4436, 2956	3557	63	16472	1.91115	0.882034	0.0218092	0.0207944
GOTERM_CC_DIRECT	GO:0005913~cell-cell adherens junction	91	2.43772	0.000879516	23647, 9101, 8650, 6231, 6159, 5861, 81607, 7082, 23367, 2194, 4092, 201633, 471, 5062, 5817, 5818, 5819, 1654, 1499, 1453, 10938, 831, 5214, 118, 999, 5216, 10211, 3875, 6624, 4008, 3799, 5339, 10611, 6286, 6520, 4067, 8301, 11273, 83939, 259197, 2317, 682, 324, 55379, 800, 56829, 3688, 4854, 5901, 6714, 3646, 2319, 10666, 50848, 8352, 23705, 6772, 6455, 1000, 2011, 8350, 8351, 3417, 3337, 3939,…	3662	321	17735	1.37293	0.629362	0.0132279	0.0121256
GOTERM_BP_DIRECT	GO:0045785~positive regulation of cell adhesion	20	0.535762	0.000902933	8784, 4284, 6352, 7422, 6288, 6387, 7124, 8631, 3373, 2064, 3592, 3084, 284, 7052, 7030, 1236, 566, 78986, 3685, 5578	3590	43	16396	2.12425	0.999466	0.0154648	0.0143171
GOTERM_BP_DIRECT	GO:0050715~positive regulation of cytokine secretion	14	0.375033	0.000914846	929, 4282, 23705, 6850, 6288, 7124, 3661, 3552, 186, 3586, 3630, 283420, 5734, 6714	3590	25	16396	2.55759	0.999517	0.0156367	0.0144763
GOTERM_BP_DIRECT	GO:0006816~calcium ion transport	30	0.803643	0.000928589	6352, 6355, 7421, 7226, 5664, 59341, 2701, 1139, 773, 1137, 1234, 1179, 6348, 89832, 5579, 857, 815, 347732, 818, 7178, 6520, 6588, 5311, 24145, 1594, 1230, 2534, 487, 4852, 6717	3590	76	16396	1.80281	0.999569	0.0158069	0.0146338
GOTERM_BP_DIRECT	GO:0030216~keratinocyte differentiation	30	0.803643	0.000928589	6698, 3858, 574414, 1475, 2069, 6700, 8626, 6768, 836, 6789, 6704, 6703, 3713, 10413, 7474, 182, 7051, 7053, 7251, 27152, 10628, 301, 2312, 4851, 3664, 6699, 5469, 1969, 5604, 3868	3590	76	16396	1.80281	0.999569	0.0158069	0.0146338
GOTERM_MF_DIRECT	GO:0004950~chemokine receptor activity	11	0.294669	0.000930713	2833, 1524, 1238, 1235, 729230, 1234, 10803, 3577, 1233, 1230, 2829	3557	17	16472	2.99644	0.901767	0.023437	0.0223465
GOTERM_BP_DIRECT	GO:0043124~negative regulation of I-kappaB kinase/NF-kappaB signaling	19	0.508974	0.000942712	91662, 7088, 22900, 9100, 25, 6772, 2099, 29108, 9370, 23411, 9173, 79671, 10318, 171389, 399, 79931, 841, 8737, 7128	3590	40	16396	2.16939	0.999617	0.015982	0.014796
GOTERM_BP_DIRECT	GO:0030819~positive regulation of cAMP biosynthetic process	19	0.508974	0.000942712	5741, 19, 2691, 1392, 9495, 153, 133, 551, 2778, 2931, 135, 113, 2852, 796, 2641, 56246, 799, 7349, 5744	3590	40	16396	2.16939	0.999617	0.015982	0.014796
GOTERM_BP_DIRECT	GO:0001570~vasculogenesis	24	0.642915	0.000950831	3791, 7422, 64321, 7137, 6862, 2022, 3087, 7040, 55273, 7075, 3726, 133, 57007, 6608, 4915, 51564, 3037, 8879, 54922, 857, 5921, 1969, 5747, 10413	3590	56	16396	1.95734	0.999642	0.016087	0.0148931
GOTERM_BP_DIRECT	GO:0006952~defense response	27	0.723279	0.000965599	6890, 4353, 6376, 3240, 114548, 2625, 10318, 972, 4600, 133396, 730249, 9235, 4283, 6387, 4486, 64127, 1053, 3297, 1471, 3624, 3106, 2532, 1441, 9308, 6039, 4599, 10367	3590	66	16396	1.86837	0.999684	0.0162684	0.0150611
GOTERM_BP_DIRECT	GO:0045931~positive regulation of mitotic cell cycle	15	0.401822	0.000967407	5781, 6198, 25, 9099, 4193, 351, 891, 332, 675, 983, 3169, 2255, 5578, 1978, 1977	3590	28	16396	2.44668	0.999688	0.0162684	0.0150611
GOTERM_BP_DIRECT	GO:0010033~response to organic substance	15	0.401822	0.000967407	7078, 6286, 7474, 5970, 5345, 1385, 1396, 1075, 366, 999, 6647, 6713, 10013, 308, 9619	3590	28	16396	2.44668	0.999688	0.0162684	0.0150611
GOTERM_MF_DIRECT	GO:0019825~oxygen binding	21	0.56255	0.000989938	4051, 4151, 3043, 3042, 114757, 3050, 1558, 1557, 1545, 1544, 1555, 1588, 1543, 1576, 213, 1565, 3039, 3048, 6999, 6648, 1559	3557	47	16472	2.06911	0.915258	0.0245745	0.0234311
GOTERM_BP_DIRECT	GO:0048701~embryonic cranial skeleton morphogenesis	16	0.42861	0.000990748	7046, 4087, 6495, 4088, 5156, 5079, 9775, 2263, 7291, 7020, 4838, 2778, 652, 4323, 6899, 29072	3590	31	16396	2.35723	0.999744	0.016497	0.0152728
GOTERM_BP_DIRECT	GO:1990090~cellular response to nerve growth factor stimulus	16	0.42861	0.000990748	7442, 6132, 11021, 6863, 1385, 3397, 351, 4914, 5906, 796, 1453, 10938, 10519, 867, 207, 1869	3590	31	16396	2.35723	0.999744	0.016497	0.0152728
GOTERM_BP_DIRECT	GO:0045765~regulation of angiogenesis	16	0.42861	0.000990748	7453, 3397, 2185, 2064, 3162, 3848, 1942, 3569, 2247, 1499, 51330, 60675, 4763, 10563, 3952, 1969	3590	31	16396	2.35723	0.999744	0.016497	0.0152728
GOTERM_BP_DIRECT	GO:0006641~triglyceride metabolic process	17	0.455398	0.000990891	2180, 5781, 350, 341, 3638, 2876, 2710, 345, 336, 348, 857, 847, 4547, 255738, 859, 5408, 2538	3590	34	16396	2.28357	0.999744	0.016497	0.0152728
GOTERM_BP_DIRECT	GO:0045787~positive regulation of cell cycle	17	0.455398	0.000990891	22954, 8013, 6532, 8061, 2263, 7051, 2260, 7042, 1019, 10018, 595, 4609, 1027, 2323, 811, 6737, 5914	3590	34	16396	2.28357	0.999744	0.016497	0.0152728
GOTERM_MF_DIRECT	GO:0004708~MAP kinase kinase activity	9	0.241093	0.000995598	5063, 5608, 5609, 1432, 120892, 5602, 7867, 5604, 5606	3557	12	16472	3.47315	0.916446	0.0245745	0.0234311
GOTERM_MF_DIRECT	GO:0002039~p53 binding	27	0.723279	0.00101118	9100, 6597, 6872, 6794, 6598, 2033, 1020, 7161, 23028, 4193, 2623, 387893, 78986, 8626, 79813, 10197, 8805, 4582, 7157, 7874, 23476, 23411, 25898, 3329, 1029, 2932, 1387	3557	67	16472	1.86617	0.919631	0.0247144	0.0235644
GOTERM_CC_DIRECT	GO:0005730~nucleolus	212	5.67908	0.00102856	6230, 9188, 6231, 6597, 6598, 51087, 4609, 10537, 56892, 54478, 4841, 5930, 6228, 3875, 84681, 5936, 5393, 5394, 51529, 6122, 8540, 8661, 6124, 79080, 55573, 4736, 7341, 25, 6495, 6132, 6135, 7465, 4751, 6136, 114049, 4193, 26097, 57761, 1476, 814, 1915, 10199, 6129, 51548, 51547, 31, 4869, 6141, 6144, 6143, 1373, 22984, 142, 10524, 10521, 5725, 3669, 6936, 8453, 10293, 4771, 29108, 4092, 1019, 1…	3662	845	17735	1.21504	0.686767	0.0152659	0.0139938
GOTERM_MF_DIRECT	GO:0042277~peptide binding	24	0.642915	0.00103923	9520, 6198, 5045, 64167, 4012, 5125, 4311, 1396, 290, 84909, 283, 3416, 552, 1215, 2028, 2798, 554, 23394, 1453, 623, 5478, 811, 5479, 51752	3557	57	16472	1.94984	0.925063	0.0251534	0.023983
GOTERM_BP_DIRECT	GO:0071310~cellular response to organic substance	11	0.294669	0.00104441	7123, 596, 7078, 3553, 811, 834, 30009, 128239, 6833, 6855, 968	3590	17	16396	2.9552	0.999836	0.0172503	0.0159701
GOTERM_BP_DIRECT	GO:0044849~estrous cycle	11	0.294669	0.00104441	5111, 301, 23394, 2796, 7226, 3037, 3036, 4986, 1958, 4316, 4988	3590	17	16396	2.9552	0.999836	0.0172503	0.0159701
GOTERM_BP_DIRECT	GO:0048265~response to pain	11	0.294669	0.00104441	1910, 2701, 5582, 774, 796, 6863, 7349, 1392, 6869, 5649, 5979	3590	17	16396	2.9552	0.999836	0.0172503	0.0159701
GOTERM_BP_DIRECT	GO:0071380~cellular response to prostaglandin E stimulus	11	0.294669	0.00104441	5030, 2778, 5581, 5562, 5563, 2782, 5732, 5468, 207, 5734, 31	3590	17	16396	2.9552	0.999836	0.0172503	0.0159701
GOTERM_CC_DIRECT	GO:0042612~MHC class I protein complex	8	0.214305	0.00105309	3119, 3107, 3106, 3105, 567, 3135, 3133, 3077	3662	10	17735	3.87439	0.695326	0.0154271	0.0141415
GOTERM_BP_DIRECT	GO:0000082~G1/S transition of mitotic cell cycle	37	0.99116	0.00106485	8453, 4172, 4173, 8452, 6198, 8554, 5422, 1022, 1021, 6194, 55388, 990, 1019, 595, 1017, 6502, 1719, 5557, 815, 1978, 818, 1977, 6241, 7298, 5111, 1033, 1032, 1029, 10769, 3624, 1027, 983, 6117, 128239, 3688, 8317, 5925	3590	101	16396	1.67311	0.999862	0.0175531	0.0162505
GOTERM_BP_DIRECT	GO:0045078~positive regulation of interferon-gamma biosynthetic process	9	0.241093	0.00109795	7098, 51284, 115650, 51311, 59067, 161882, 54106, 246778, 80381	3590	12	16396	3.42535	0.999895	0.0177825	0.0164628
GOTERM_BP_DIRECT	GO:0043950~positive regulation of cAMP-mediated signaling	9	0.241093	0.00109795	6373, 2833, 2778, 4283, 5196, 2695, 4988, 153, 3627	3590	12	16396	3.42535	0.999895	0.0177825	0.0164628
GOTERM_BP_DIRECT	GO:0032693~negative regulation of interleukin-10 production	9	0.241093	0.00109795	8288, 177, 3718, 29126, 51561, 3620, 28514, 80380, 50943	3590	12	16396	3.42535	0.999895	0.0177825	0.0164628
GOTERM_BP_DIRECT	GO:0030595~leukocyte chemotaxis	9	0.241093	0.00109795	3603, 5196, 5197, 1269, 643, 6376, 3586, 1880, 1901	3590	12	16396	3.42535	0.999895	0.0177825	0.0164628
GOTERM_BP_DIRECT	GO:0031669~cellular response to nutrient levels	9	0.241093	0.00109795	3569, 114131, 5562, 5563, 57521, 2475, 3383, 8408, 3934	3590	12	16396	3.42535	0.999895	0.0177825	0.0164628
GOTERM_BP_DIRECT	GO:0036499~PERK-mediated unfolded protein response	9	0.241093	0.00109795	4780, 467, 468, 3576, 6347, 3484, 1649, 9451, 3309	3590	12	16396	3.42535	0.999895	0.0177825	0.0164628
GOTERM_BP_DIRECT	GO:0042738~exogenous drug catabolic process	9	0.241093	0.00109795	1558, 1557, 1555, 1544, 1576, 4842, 8856, 1559, 1548	3590	12	16396	3.42535	0.999895	0.0177825	0.0164628
GOTERM_BP_DIRECT	GO:0045778~positive regulation of ossification	9	0.241093	0.00109795	650, 5020, 7474, 652, 796, 6863, 659, 7704, 7042	3590	12	16396	3.42535	0.999895	0.0177825	0.0164628
GOTERM_BP_DIRECT	GO:0001779~natural killer cell differentiation	9	0.241093	0.00109795	6670, 3600, 7301, 3398, 558, 257101, 10461, 6504, 5293	3590	12	16396	3.42535	0.999895	0.0177825	0.0164628
GOTERM_BP_DIRECT	GO:0007189~adenylate cyclase-activating G-protein coupled receptor signaling pathway	22	0.589338	0.00110831	7253, 5741, 2691, 154, 2778, 135, 113, 114131, 27201, 796, 2642, 2774, 799, 5731, 5732, 108, 5733, 109, 5744, 5734, 6915, 196883	3590	50	16396	2.00954	0.999904	0.0179156	0.016586
GOTERM_BP_DIRECT	GO:0071300~cellular response to retinoic acid	28	0.750067	0.00113555	27, 130497, 6532, 3066, 7481, 5916, 4609, 6347, 6625, 3952, 5979, 10413, 4208, 5914, 89780, 5076, 4582, 7474, 6662, 4067, 6862, 9314, 19, 2185, 2042, 3371, 5468, 6899	3590	70	16396	1.82685	0.999923	0.0183203	0.0169608
GOTERM_MF_DIRECT	GO:0001102~RNA polymerase II activating transcription factor binding	18	0.482186	0.00119441	5393, 8320, 4780, 4088, 9611, 6862, 1385, 2033, 161882, 3172, 1499, 1387, 1386, 78986, 4005, 3429, 5925, 3725	3557	38	16472	2.19357	0.949118	0.0286313	0.0272991
GOTERM_BP_DIRECT	GO:0045777~positive regulation of blood pressure	12	0.321457	0.00124946	50848, 5020, 1268, 2740, 128, 3398, 9370, 183, 2837, 151, 6915, 9607	3590	20	16396	2.74028	0.99997	0.019965	0.0184833
GOTERM_BP_DIRECT	GO:0030101~natural killer cell activation	12	0.321457	0.00124946	56832, 3558, 8809, 57823, 22914, 3456, 841, 9437, 914, 3689, 3606, 5293	3590	20	16396	2.74028	0.99997	0.019965	0.0184833
GOTERM_BP_DIRECT	GO:0035584~calcium-mediated signaling using intracellular calcium source	12	0.321457	0.00124946	4915, 6364, 2039, 3791, 566, 7226, 51024, 7412, 1672, 6403, 5566, 2281	3590	20	16396	2.74028	0.99997	0.019965	0.0184833
GOTERM_BP_DIRECT	GO:0046697~decidualization	12	0.321457	0.00124946	682, 3726, 6781, 6696, 4221, 7421, 1594, 5467, 2693, 5743, 1508, 3976	3590	20	16396	2.74028	0.99997	0.019965	0.0184833
GOTERM_BP_DIRECT	GO:0042744~hydrogen peroxide catabolic process	12	0.321457	0.00124946	8288, 2878, 50506, 2876, 7001, 3039, 4353, 4025, 3043, 847, 25824, 7173	3590	20	16396	2.74028	0.99997	0.019965	0.0184833
GOTERM_BP_DIRECT	GO:0034644~cellular response to UV	20	0.535762	0.00126647	5295, 5111, 6872, 7157, 5796, 2033, 7161, 23028, 581, 4609, 545, 578, 842, 1387, 468, 8626, 5743, 5424, 4776, 7528	3590	44	16396	2.07597	0.999974	0.0201815	0.0186838
GOTERM_BP_DIRECT	GO:0032091~negative regulation of protein binding	24	0.642915	0.00126785	5580, 6790, 4043, 5155, 5465, 5499, 161882, 6093, 23028, 581, 6590, 147138, 166, 2932, 56155, 23394, 3434, 3433, 120892, 5599, 4776, 857, 10763, 1636	3590	57	16396	1.923	0.999975	0.0201815	0.0186838
GOTERM_BP_DIRECT	GO:0048839~inner ear development	19	0.508974	0.00134013	50506, 5781, 6495, 9547, 28514, 1052, 7040, 54360, 1050, 7042, 9261, 4094, 650, 1027, 10804, 168667, 5159, 6678, 6657	3590	41	16396	2.11648	0.999986	0.021251	0.019674
GOTERM_BP_DIRECT	GO:0032526~response to retinoic acid	19	0.508974	0.00134013	5020, 6256, 9536, 6720, 1032, 8273, 3482, 360, 7075, 3490, 1843, 5916, 1512, 952, 5159, 5468, 171023, 5914, 5727	3590	41	16396	2.11648	0.999986	0.021251	0.019674
GOTERM_BP_DIRECT	GO:0030574~collagen catabolic process	26	0.696491	0.00138205	5045, 1284, 1281, 1514, 1513, 4323, 5657, 4320, 4321, 5653, 4322, 1293, 1292, 1291, 1520, 4312, 9902, 4313, 4314, 1509, 1508, 4316, 4317, 4318, 4319, 9509	3590	64	16396	1.8554	0.99999	0.0218742	0.0202509
GOTERM_BP_DIRECT	GO:0032967~positive regulation of collagen biosynthetic process	13	0.348245	0.00138686	5345, 2022, 3066, 7040, 1490, 25824, 2149, 652, 57332, 2147, 5159, 7349, 6347	3590	23	16396	2.58142	0.999991	0.0219088	0.0202829
GOTERM_MF_DIRECT	GO:0046790~virion binding	8	0.214305	0.00139794	5818, 1401, 325, 30835, 5478, 10332, 7251, 7184	3557	10	16472	3.70469	0.96938	0.0326167	0.0310991
GOTERM_MF_DIRECT	GO:0005159~insulin-like growth factor receptor binding	10	0.267881	0.00139992	8651, 2778, 5295, 3479, 5972, 3630, 3643, 3667, 408, 3481	3557	15	16472	3.08725	0.969531	0.0326167	0.0310991
GOTERM_MF_DIRECT	GO:0032395~MHC class II receptor activity	10	0.267881	0.00139992	3108, 3119, 3107, 3117, 3126, 3115, 3125, 3113, 3872, 3123	3557	15	16472	3.08725	0.969531	0.0326167	0.0310991
GOTERM_BP_DIRECT	GO:0038128~ERBB2 signaling pathway	18	0.482186	0.00140554	5295, 9101, 7311, 4145, 4893, 6654, 2066, 3320, 2064, 5290, 3084, 1950, 2069, 7316, 207, 6714, 1956, 3845	3590	38	16396	2.16338	0.999992	0.0221618	0.0205171
GOTERM_CC_DIRECT	GO:0030669~clathrin-coated endocytic vesicle membrane	18	0.482186	0.00141592	7474, 10053, 3123, 1173, 3119, 3117, 3949, 972, 3115, 3126, 3125, 3113, 7855, 338, 7306, 4920, 2209, 928	3662	40	17735	2.17934	0.797757	0.0204763	0.01877
GOTERM_BP_DIRECT	GO:0030501~positive regulation of bone mineralization	17	0.455398	0.00145782	9365, 4088, 130497, 5741, 338773, 7040, 7020, 154, 650, 652, 655, 2201, 5027, 9636, 659, 4208, 80381	3590	35	16396	2.21832	0.999995	0.0228995	0.0212001
GOTERM_BP_DIRECT	GO:0071902~positive regulation of protein serine/threonine kinase activity	17	0.455398	0.00145782	2180, 808, 8941, 6794, 8851, 4057, 3481, 1436, 387, 2146, 57521, 10519, 801, 6622, 6789, 5604, 6714	3590	35	16396	2.21832	0.999995	0.0228995	0.0212001
GOTERM_CC_DIRECT	GO:0031232~extrinsic component of external side of plasma membrane	7	0.187517	0.00146513	5340, 410, 301, 7018, 255738, 5270, 2219	3662	8	17735	4.23761	0.808694	0.0209198	0.0191765
GOTERM_BP_DIRECT	GO:0006897~endocytosis	47	1.25904	0.00146728	9322, 5286, 8678, 8411, 5861, 4036, 6455, 2690, 351, 29924, 54453, 1139, 598, 115123, 1453, 10938, 92737, 998, 89832, 4864, 7879, 10332, 50632, 859, 4041, 9892, 50618, 22848, 8301, 23237, 9372, 57534, 3949, 30011, 120892, 10462, 9902, 30835, 7249, 51257, 6614, 6855, 10188, 407, 51479, 11037, 5868	3590	139	16396	1.54428	0.999995	0.0230049	0.0212977
GOTERM_BP_DIRECT	GO:1900026~positive regulation of substrate adhesion-dependent cell spreading	16	0.42861	0.00149072	2243, 6281, 673, 2039, 335, 1398, 3037, 2244, 201294, 10519, 2266, 998, 11078, 811, 3987, 5879	3590	32	16396	2.28357	0.999996	0.0232641	0.0215376
GOTERM_BP_DIRECT	GO:0071549~cellular response to dexamethasone stimulus	15	0.401822	0.00149643	7023, 6770, 6198, 7040, 1392, 383, 186, 54541, 3569, 3456, 842, 6347, 1956, 1978, 1977	3590	29	16396	2.36231	0.999996	0.0232641	0.0215376
GOTERM_BP_DIRECT	GO:0046627~negative regulation of insulin receptor signaling pathway	15	0.401822	0.00149643	8651, 5580, 6198, 5167, 5970, 7248, 9021, 197, 5590, 2931, 3553, 7249, 5579, 3667, 57727	3590	29	16396	2.36231	0.999996	0.0232641	0.0215376
GOTERM_BP_DIRECT	GO:0048662~negative regulation of smooth muscle cell proliferation	15	0.401822	0.00149643	9314, 3486, 9370, 3592, 3162, 283, 199, 3458, 3600, 3611, 347, 10891, 5467, 7128, 5468	3590	29	16396	2.36231	0.999996	0.0232641	0.0215376
GOTERM_CC_DIRECT	GO:0005741~mitochondrial outer membrane	47	1.25904	0.00151107	5241, 54708, 6198, 5366, 10493, 23446, 4170, 79671, 10018, 596, 1610, 597, 1654, 598, 578, 81890, 637, 4128, 518, 10058, 57506, 10456, 32, 51703, 2180, 8564, 5298, 5894, 91543, 340061, 1594, 3098, 581, 383, 2710, 27113, 841, 1267, 120892, 1386, 2475, 11331, 5621, 9868, 706, 8936, 3429	3662	147	17735	1.54844	0.818369	0.0213061	0.0195306
GOTERM_BP_DIRECT	GO:0002479~antigen processing and presentation of exogenous peptide antigen via MHC class I, TAP-dependent	25	0.669703	0.00152127	9861, 1536, 5718, 5719, 3135, 5698, 5710, 10197, 5711, 5713, 5714, 2209, 3133, 5707, 5708, 3107, 5709, 3106, 3105, 567, 3685, 5721, 5688, 5700, 948	3590	61	16396	1.87177	0.999997	0.0232641	0.0215376
GOTERM_BP_DIRECT	GO:2000727~positive regulation of cardiac muscle cell differentiation	8	0.214305	0.00152565	2932, 89780, 26585, 1948, 7040, 409, 4208, 3084	3590	10	16396	3.6537	0.999997	0.0232641	0.0215376
GOTERM_BP_DIRECT	GO:0043114~regulation of vascular permeability	8	0.214305	0.00152565	7010, 3269, 566, 29, 624, 613, 6714, 4879	3590	10	16396	3.6537	0.999997	0.0232641	0.0215376
GOTERM_BP_DIRECT	GO:0045792~negative regulation of cell size	8	0.214305	0.00152565	5728, 84335, 7248, 2475, 7349, 64798, 207, 859	3590	10	16396	3.6537	0.999997	0.0232641	0.0215376
GOTERM_BP_DIRECT	GO:0071803~positive regulation of podosome assembly	8	0.214305	0.00152565	1437, 3567, 7124, 7984, 4478, 5601, 6624, 6714	3590	10	16396	3.6537	0.999997	0.0232641	0.0215376
GOTERM_BP_DIRECT	GO:0060674~placenta blood vessel development	8	0.214305	0.00152565	6692, 8289, 5310, 5311, 3696, 8061, 9021, 5604	3590	10	16396	3.6537	0.999997	0.0232641	0.0215376
GOTERM_BP_DIRECT	GO:0046902~regulation of mitochondrial membrane permeability	8	0.214305	0.00152565	596, 598, 1267, 7157, 578, 5366, 6774, 10105	3590	10	16396	3.6537	0.999997	0.0232641	0.0215376
GOTERM_BP_DIRECT	GO:0010820~positive regulation of T cell chemotaxis	8	0.214305	0.00152565	8740, 6375, 6352, 7474, 102, 729230, 10563, 6868	3590	10	16396	3.6537	0.999997	0.0232641	0.0215376
GOTERM_BP_DIRECT	GO:0008228~opsonization	8	0.214305	0.00152565	10417, 653509, 1401, 4153, 961, 3929, 721, 2220	3590	10	16396	3.6537	0.999997	0.0232641	0.0215376
GOTERM_BP_DIRECT	GO:0060252~positive regulation of glial cell proliferation	8	0.214305	0.00152565	2119, 4609, 5583, 4067, 2475, 5324, 4049, 706	3590	10	16396	3.6537	0.999997	0.0232641	0.0215376
GOTERM_BP_DIRECT	GO:0002218~activation of innate immune response	8	0.214305	0.00152565	9447, 340061, 3146, 115004, 58484, 29108, 57506, 85363	3590	10	16396	3.6537	0.999997	0.0232641	0.0215376
GOTERM_BP_DIRECT	GO:0060441~epithelial tube branching involved in lung morphogenesis	10	0.267881	0.00155485	1522, 652, 1499, 64399, 6662, 3169, 7080, 8091, 1605, 3845	3590	15	16396	3.04475	0.999998	0.0233255	0.0215945
GOTERM_BP_DIRECT	GO:0033627~cell adhesion mediated by integrin	10	0.267881	0.00155485	3690, 3694, 2200, 3685, 3655, 3688, 3383, 3678, 6868, 4856	3590	15	16396	3.04475	0.999998	0.0233255	0.0215945
GOTERM_BP_DIRECT	GO:0034162~toll-like receptor 9 signaling pathway	10	0.267881	0.00155485	7189, 51284, 84868, 5289, 51135, 51311, 3654, 54106, 3656, 4615	3590	15	16396	3.04475	0.999998	0.0233255	0.0215945
GOTERM_BP_DIRECT	GO:0006911~phagocytosis, engulfment	10	0.267881	0.00155485	199, 4240, 3543, 19, 51411, 100423062, 2209, 54209, 4627, 2934	3590	15	16396	3.04475	0.999998	0.0233255	0.0215945
GOTERM_BP_DIRECT	GO:2000679~positive regulation of transcription regulatory region DNA binding	10	0.267881	0.00155485	2625, 89780, 7189, 3479, 9314, 7291, 8091, 7040, 5925, 142	3590	15	16396	3.04475	0.999998	0.0233255	0.0215945
GOTERM_BP_DIRECT	GO:0034375~high-density lipoprotein particle remodeling	10	0.267881	0.00155485	341, 345, 3990, 335, 336, 348, 3931, 55937, 949, 9619	3590	15	16396	3.04475	0.999998	0.0233255	0.0215945
GOTERM_BP_DIRECT	GO:0008631~intrinsic apoptotic signaling pathway in response to oxidative stress	10	0.267881	0.00155485	5371, 5580, 596, 3717, 1545, 2876, 4217, 5625, 6648, 56616	3590	15	16396	3.04475	0.999998	0.0233255	0.0215945
GOTERM_BP_DIRECT	GO:0060397~JAK-STAT cascade involved in growth hormone signaling pathway	10	0.267881	0.00155485	3717, 2688, 3718, 5594, 5595, 4067, 6774, 6776, 2690, 5617	3590	15	16396	3.04475	0.999998	0.0233255	0.0215945
GOTERM_BP_DIRECT	GO:0042993~positive regulation of transcription factor import into nucleus	10	0.267881	0.00155485	7494, 5295, 4088, 340061, 8841, 1440, 999, 23586, 10155, 57506	3590	15	16396	3.04475	0.999998	0.0233255	0.0215945
GOTERM_CC_DIRECT	GO:0005840~ribosome	51	1.36619	0.0015706	6230, 6196, 6155, 6232, 6231, 6234, 6159, 6235, 2197, 6191, 6192, 6194, 55168, 6227, 5610, 6622, 6229, 6228, 6122, 6124, 6167, 6203, 6202, 25873, 328, 219927, 56945, 4736, 6132, 6135, 6137, 6171, 6173, 6204, 6129, 6209, 6208, 6141, 6144, 6188, 6187, 6143, 6223, 7311, 6189, 6222, 6224, 821, 6138, 6218, 6217	3662	163	17735	1.51529	0.830182	0.0218721	0.0200494
GOTERM_BP_DIRECT	GO:0035690~cellular response to drug	27	0.723279	0.00161279	6351, 5141, 9447, 5563, 673, 4609, 2621, 10715, 3553, 6347, 4843, 1956, 3757, 4208, 7098, 4780, 7037, 7157, 5972, 9370, 7372, 5906, 1644, 5621, 1906, 969, 4659	3590	68	16396	1.81342	0.999999	0.0241513	0.022359
GOTERM_MF_DIRECT	GO:0009055~electron carrier activity	33	0.884008	0.00162155	50507, 8574, 8630, 4199, 6391, 6390, 1536, 231, 2108, 2745, 314, 217, 316, 9377, 7296, 34, 7498, 7358, 23498, 26227, 9131, 8560, 4519, 1544, 1588, 444, 3620, 128, 5447, 54205, 2936, 1109, 4835	3557	90	16472	1.69799	0.982476	0.0374309	0.0356892
GOTERM_BP_DIRECT	GO:0006909~phagocytosis	21	0.56255	0.00162283	929, 5175, 9711, 3683, 1053, 3394, 2624, 135, 301, 2621, 1991, 201294, 558, 306, 10461, 6504, 3952, 8317, 3689, 3953, 5868	3590	48	16396	1.99812	0.999999	0.0242581	0.0224579
GOTERM_BP_DIRECT	GO:0070373~negative regulation of ERK1 and ERK2 cascade	24	0.642915	0.00167145	91662, 7099, 7494, 7078, 7430, 8661, 25, 4067, 4089, 5245, 9314, 9370, 23410, 5728, 1843, 10318, 171389, 2633, 2852, 467, 78986, 408, 3976, 1846	3590	58	16396	1.88985	0.999999	0.0249402	0.0230894
GOTERM_MF_DIRECT	GO:0008301~DNA binding, bending	11	0.294669	0.00169031	7153, 55809, 2623, 7155, 51176, 2300, 3146, 1396, 2296, 8091, 3087	3557	18	16472	2.82998	0.98524	0.0383087	0.0365261
GOTERM_MF_DIRECT	GO:0005112~Notch binding	11	0.294669	0.00169031	22848, 54567, 56892, 92737, 28514, 4851, 182, 10683, 6868, 4856, 3714	3557	18	16472	2.82998	0.98524	0.0383087	0.0365261
GOTERM_BP_DIRECT	GO:0030838~positive regulation of actin filament polymerization	20	0.535762	0.00174736	5581, 6366, 6356, 1440, 253260, 29108, 3055, 2185, 3383, 25802, 10602, 1236, 246, 2475, 6369, 5216, 10178, 10344, 5879, 4868	3590	45	16396	2.02984	1	0.02598	0.024052
GOTERM_BP_DIRECT	GO:0032870~cellular response to hormone stimulus	20	0.535762	0.00174736	150094, 6198, 6586, 6774, 2353, 2690, 7350, 3490, 1081, 3726, 199, 3727, 1843, 552, 554, 1584, 2354, 5228, 10499, 3725	3590	45	16396	2.02984	1	0.02598	0.024052
GOTERM_BP_DIRECT	GO:0007049~cell cycle	67	1.7948	0.00177476	5580, 6790, 5581, 6793, 6872, 6598, 9589, 1020, 54790, 55240, 6195, 196, 387778, 2305, 672, 595, 991, 1731, 5655, 5414, 3875, 91768, 10015, 3714, 54957, 150094, 5594, 5595, 7014, 1033, 115426, 26206, 339967, 10628, 51652, 55213, 60561, 3642, 55615, 345643, 6714, 53918, 5884, 2770, 23741, 140690, 894, 896, 55787, 1871, 1870, 8626, 7157, 5499, 2580, 9099, 5292, 1326, 115098, 2852, 3621, 545, 4678, …	3590	216	16396	1.41666	1	0.0263404	0.0243856
GOTERM_CC_DIRECT	GO:0030670~phagocytic vesicle membrane	23	0.616126	0.0018531	9474, 5880, 5289, 3133, 23545, 7097, 7096, 1536, 1755, 3107, 3106, 3105, 567, 535, 3135, 306, 7879, 3633, 10312, 3920, 5868, 4218, 10333	3662	58	17735	1.92049	0.87659	0.0254915	0.0233672
GOTERM_BP_DIRECT	GO:0051496~positive regulation of stress fiber assembly	19	0.508974	0.00187082	50507, 7046, 4088, 4771, 5058, 6863, 5345, 7984, 6281, 2041, 1490, 7481, 673, 387, 335, 2475, 5216, 10411, 5879	3590	42	16396	2.06608	1	0.027473	0.0254342
GOTERM_BP_DIRECT	GO:0090002~establishment of protein localization to plasma membrane	19	0.508974	0.00187082	50848, 7132, 9475, 7430, 64398, 7124, 5872, 1000, 81619, 3551, 6281, 2580, 6093, 999, 10098, 10211, 859, 3911, 2319	3590	42	16396	2.06608	1	0.027473	0.0254342
GOTERM_BP_DIRECT	GO:0090090~negative regulation of canonical Wnt signaling pathway	53	1.41977	0.00188441	9861, 8452, 3484, 6591, 7481, 27122, 7316, 10297, 5698, 6789, 4920, 9978, 64321, 4300, 5071, 166, 5707, 80199, 5708, 5709, 324, 51176, 4851, 5700, 10146, 25928, 8313, 1000, 3065, 9241, 650, 5718, 5719, 1432, 2487, 5710, 10197, 5711, 857, 1958, 5713, 5714, 7474, 6662, 7311, 2932, 2931, 26585, 348, 5688, 5721, 6657, 1649	3590	163	16396	1.48502	1	0.027473	0.0254342
GOTERM_MF_DIRECT	GO:0004869~cysteine-type endopeptidase inhibitor activity	16	0.42861	0.00188843	8530, 1473, 58484, 1471, 440068, 114769, 197, 10406, 332, 3827, 79444, 1476, 1475, 831, 6317, 3933	3557	33	16472	2.24527	0.990999	0.0424131	0.0404396
GOTERM_BP_DIRECT	GO:0060324~face development	11	0.294669	0.0018906	5916, 673, 7474, 5594, 5595, 5894, 6658, 55636, 5604, 8195, 5914	3590	18	16396	2.79102	1	0.027473	0.0254342
GOTERM_BP_DIRECT	GO:0050870~positive regulation of T cell activation	11	0.294669	0.0018906	3329, 7189, 961, 729230, 3115, 3113, 29108, 6347, 7070, 3932, 8915	3590	18	16396	2.79102	1	0.027473	0.0254342
GOTERM_BP_DIRECT	GO:0051493~regulation of cytoskeleton organization	11	0.294669	0.0018906	3925, 5594, 5364, 5595, 7984, 6279, 2011, 91624, 57551, 5747, 6280	3590	18	16396	2.79102	1	0.027473	0.0254342
GOTERM_BP_DIRECT	GO:0046597~negative regulation of viral entry into host cell	11	0.294669	0.0018906	325, 10581, 3440, 81603, 81559, 85363, 10410, 2934, 8519, 7706, 2219	3590	18	16396	2.79102	1	0.027473	0.0254342
GOTERM_BP_DIRECT	GO:0031668~cellular response to extracellular stimulus	11	0.294669	0.0018906	166, 199, 23394, 4067, 2353, 5027, 558, 8061, 1030, 3655, 79792	3590	18	16396	2.79102	1	0.027473	0.0254342
GOTERM_BP_DIRECT	GO:0045954~positive regulation of natural killer cell mediated cytotoxicity	11	0.294669	0.0018906	3902, 5817, 23705, 5819, 3916, 22914, 4068, 59067, 3592, 10666, 259197	3590	18	16396	2.79102	1	0.027473	0.0254342
GOTERM_BP_DIRECT	GO:0070266~necroptotic process	11	0.294669	0.0018906	929, 7099, 7098, 356, 8737, 11035, 23643, 197259, 10105, 5836, 148022	3590	18	16396	2.79102	1	0.027473	0.0254342
GOTERM_BP_DIRECT	GO:0001782~B cell homeostasis	11	0.294669	0.0018906	10018, 596, 115650, 4067, 578, 6654, 23495, 10673, 50943, 4208, 581	3590	18	16396	2.79102	1	0.027473	0.0254342
GOTERM_BP_DIRECT	GO:0001708~cell fate specification	11	0.294669	0.0018906	3170, 6608, 50937, 1499, 324, 6662, 5663, 4851, 10297, 6899, 3688	3590	18	16396	2.79102	1	0.027473	0.0254342
GOTERM_MF_DIRECT	GO:0019838~growth factor binding	14	0.375033	0.00198339	7010, 7046, 6386, 3791, 3572, 2064, 2690, 83888, 1843, 2, 2321, 659, 8828, 8829	3557	27	16472	2.40119	0.992899	0.0441482	0.0420939
GOTERM_CC_DIRECT	GO:0031901~early endosome membrane	37	0.99116	0.00199968	8673, 1080, 9146, 8630, 8411, 6455, 220972, 115123, 100287171, 10938, 3135, 7855, 857, 3996, 3633, 5878, 5879, 2209, 1956, 10479, 5371, 89780, 9896, 8027, 3133, 200576, 9372, 4914, 3107, 3106, 24141, 3105, 301, 55016, 567, 55697, 926	3662	110	17735	1.629	0.89543	0.027118	0.0248582
GOTERM_BP_DIRECT	GO:0019233~sensory perception of pain	22	0.589338	0.00200407	5594, 7345, 5595, 6863, 4311, 1020, 1910, 1137, 1269, 1268, 60675, 2695, 623, 57555, 5027, 6336, 5743, 1906, 4204, 4986, 4988, 2902	3590	52	16396	1.93225	1	0.0285475	0.0264289
GOTERM_MF_DIRECT	GO:0043621~protein self-association	20	0.535762	0.00200423	22954, 6352, 7157, 91543, 3397, 1075, 7273, 175, 189, 2039, 6513, 7128, 6900, 6855, 27072, 1859, 255738, 4615, 43, 8915	3557	46	16472	2.01342	0.993259	0.0442171	0.0421597
GOTERM_CC_DIRECT	GO:0042613~MHC class II protein complex	11	0.294669	0.00202237	3108, 3119, 3107, 3117, 3105, 972, 3126, 3115, 3125, 3113, 3123	3662	19	17735	2.80383	0.898078	0.027118	0.0248582
GOTERM_BP_DIRECT	GO:0031659~positive regulation of cyclin-dependent protein serine/threonine kinase activity involved in G1/S transition of mitotic cell cycle	7	0.187517	0.00202957	5310, 5311, 2255, 207, 6868, 1956, 5292	3590	8	16396	3.99624	1	0.0285475	0.0264289
GOTERM_BP_DIRECT	GO:0050863~regulation of T cell activation	7	0.187517	0.00202957	282616, 6352, 27240, 920, 27040, 101180976, 282617	3590	8	16396	3.99624	1	0.0285475	0.0264289
GOTERM_BP_DIRECT	GO:0002480~antigen processing and presentation of exogenous peptide antigen via MHC class I, TAP-independent	7	0.187517	0.00202957	3107, 3106, 3105, 4012, 567, 3135, 3133	3590	8	16396	3.99624	1	0.0285475	0.0264289
GOTERM_BP_DIRECT	GO:0010818~T cell chemotaxis	7	0.187517	0.00202957	6373, 2833, 58191, 1880, 6348, 3627, 5293	3590	8	16396	3.99624	1	0.0285475	0.0264289
GOTERM_BP_DIRECT	GO:0045630~positive regulation of T-helper 2 cell differentiation	7	0.187517	0.00202957	3569, 3566, 942, 114548, 3606, 5590, 5914	3590	8	16396	3.99624	1	0.0285475	0.0264289
GOTERM_BP_DIRECT	GO:0002438~acute inflammatory response to antigenic stimulus	7	0.187517	0.00202957	462, 3579, 1991, 923, 133396, 3383, 4988	3590	8	16396	3.99624	1	0.0285475	0.0264289
GOTERM_BP_DIRECT	GO:0045416~positive regulation of interleukin-8 biosynthetic process	7	0.187517	0.00202957	7099, 51284, 7124, 336, 51311, 1991, 8915	3590	8	16396	3.99624	1	0.0285475	0.0264289
GOTERM_BP_DIRECT	GO:0019064~fusion of virus membrane with host plasma membrane	7	0.187517	0.00202957	5819, 2621, 1234, 920, 7852, 5478, 8692	3590	8	16396	3.99624	1	0.0285475	0.0264289
GOTERM_BP_DIRECT	GO:0048304~positive regulation of isotype switching to IgG isotypes	7	0.187517	0.00202957	3558, 3458, 940, 3565, 30009, 79915, 958	3590	8	16396	3.99624	1	0.0285475	0.0264289
GOTERM_BP_DIRECT	GO:0048739~cardiac muscle fiber development	7	0.187517	0.00202957	1525, 4629, 7422, 8557, 91624, 4624, 7273	3590	8	16396	3.99624	1	0.0285475	0.0264289
GOTERM_BP_DIRECT	GO:0002467~germinal center formation	7	0.187517	0.00202957	4791, 201294, 602, 10563, 604, 6868, 4208	3590	8	16396	3.99624	1	0.0285475	0.0264289
GOTERM_BP_DIRECT	GO:0032966~negative regulation of collagen biosynthetic process	7	0.187517	0.00202957	4261, 3569, 5906, 5467, 5468, 3570, 114757	3590	8	16396	3.99624	1	0.0285475	0.0264289
GOTERM_BP_DIRECT	GO:0045410~positive regulation of interleukin-6 biosynthetic process	7	0.187517	0.00202957	7189, 114609, 3458, 2069, 3553, 10333, 7096	3590	8	16396	3.99624	1	0.0285475	0.0264289
GOTERM_BP_DIRECT	GO:0034383~low-density lipoprotein particle clearance	7	0.187517	0.00202957	3949, 10938, 338, 9370, 948, 3162, 949	3590	8	16396	3.99624	1	0.0285475	0.0264289
GOTERM_BP_DIRECT	GO:0071236~cellular response to antibiotic	7	0.187517	0.00202957	6770, 1027, 5321, 1396, 6548, 3309, 4193	3590	8	16396	3.99624	1	0.0285475	0.0264289
GOTERM_BP_DIRECT	GO:0010529~negative regulation of transposition	7	0.187517	0.00202957	27350, 60489, 140564, 164668, 200315, 200316, 9582	3590	8	16396	3.99624	1	0.0285475	0.0264289
GOTERM_BP_DIRECT	GO:0070244~negative regulation of thymocyte apoptotic process	7	0.187517	0.00202957	6097, 100, 1942, 3091, 3718, 652, 391104	3590	8	16396	3.99624	1	0.0285475	0.0264289
GOTERM_BP_DIRECT	GO:0010888~negative regulation of lipid storage	7	0.187517	0.00202957	3569, 3690, 1401, 4792, 7124, 3685, 3952	3590	8	16396	3.99624	1	0.0285475	0.0264289
GOTERM_CC_DIRECT	GO:0016607~nuclear speck	60	1.60729	0.00204347	8178, 6430, 9541, 8535, 9984, 4332, 9589, 2034, 29107, 9063, 84844, 54033, 1654, 56892, 102724594, 4841, 6427, 10178, 6625, 6426, 56339, 1859, 9939, 9739, 4208, 5936, 3091, 11273, 24148, 26121, 23451, 328, 10346, 7341, 9129, 6651, 8554, 6015, 9360, 51340, 26097, 10594, 51747, 4000, 64344, 9775, 10482, 23435, 25898, 10569, 57018, 11338, 2334, 5566, 51631, 7307, 51755, 7704, 6736, 2736	3662	201	17735	1.44567	0.900479	0.027118	0.0248582
GOTERM_CC_DIRECT	GO:0005771~multivesicular body	12	0.321457	0.00206966	7178, 684, 3916, 972, 973, 10013, 1471, 6517, 23621, 6439, 55240, 7251	3662	22	17735	2.64163	0.903383	0.0271463	0.0248841
GOTERM_BP_DIRECT	GO:0090263~positive regulation of canonical Wnt signaling pathway	41	1.09831	0.00209201	9861, 4790, 8313, 2254, 259266, 55366, 1613, 5718, 5719, 1896, 2247, 3611, 51366, 1453, 5698, 7316, 5710, 10197, 5711, 857, 4920, 5713, 5714, 10413, 89780, 7311, 2263, 5707, 5708, 5709, 120892, 2255, 84870, 5721, 5688, 5700, 406, 8658, 80351, 6659, 6714	3590	119	16396	1.57355	1	0.0293762	0.0271962
GOTERM_BP_DIRECT	GO:0001895~retina homeostasis	17	0.455398	0.00209649	5284, 728378, 11272, 4057, 4069, 3848, 563, 3315, 213, 3512, 567, 7018, 71, 6647, 5304, 60, 3933	3590	36	16396	2.1567	1	0.0293896	0.0272086
GOTERM_MF_DIRECT	GO:0030674~protein binding, bridging	29	0.776855	0.00210753	114609, 8557, 6698, 54875, 1475, 57521, 2244, 2266, 55803, 7139, 55823, 6548, 857, 858, 6624, 6767, 10432, 3713, 4747, 6804, 7373, 4221, 2243, 301, 602, 6699, 85363, 57617, 10346	3557	77	16472	1.74409	0.994792	0.0460883	0.0439438
GOTERM_BP_DIRECT	GO:0043171~peptide catabolic process	12	0.321457	0.0021078	9520, 10404, 84735, 11093, 2028, 64167, 4012, 55748, 290, 51752, 84909, 1636	3590	21	16396	2.60979	1	0.0294492	0.0272637
GOTERM_BP_DIRECT	GO:0035902~response to immobilization stress	12	0.321457	0.0021078	2821, 114131, 1544, 1543, 5972, 2353, 5468, 2185, 1392, 7040, 6648, 51083	3590	21	16396	2.60979	1	0.0294492	0.0272637
GOTERM_CC_DIRECT	GO:0017053~transcriptional repressor complex	22	0.589338	0.00211861	6670, 7023, 6497, 8841, 9611, 23013, 161882, 55250, 595, 2623, 6907, 1488, 1487, 1991, 3146, 1045, 9759, 57708, 3642, 57649, 7704, 3725	3662	55	17735	1.93719	0.908583	0.0274688	0.0251798
GOTERM_MF_DIRECT	GO:0001228~transcriptional activator activity, RNA polymerase II transcription regulatory region sequence-specific binding	34	0.910796	0.00215197	4097, 64651, 6774, 2033, 2296, 23764, 5083, 4094, 2625, 2624, 57822, 3239, 2623, 4005, 7975, 2627, 2626, 3091, 9970, 64321, 7157, 4089, 1050, 3172, 2119, 861, 466, 467, 51176, 326, 1386, 5885, 8856, 140628	3557	95	16472	1.65736	0.995339	0.0466509	0.0444802
GOTERM_BP_DIRECT	GO:0045747~positive regulation of Notch signaling pathway	16	0.42861	0.00218544	3280, 22848, 6774, 28514, 81619, 64127, 182, 3815, 54567, 2255, 56983, 8626, 4851, 10098, 4856, 3714	3590	33	16396	2.21437	1	0.030432	0.0281736
GOTERM_BP_DIRECT	GO:0010634~positive regulation of epithelial cell migration	16	0.42861	0.00218544	5581, 3091, 6662, 6863, 3373, 7042, 1512, 3458, 1235, 2255, 5216, 659, 10013, 7429, 6714, 3725	3590	33	16396	2.21437	1	0.030432	0.0281736
GOTERM_BP_DIRECT	GO:0002092~positive regulation of receptor internalization	13	0.348245	0.00222521	89780, 9463, 6850, 7422, 6401, 284, 2688, 26585, 57817, 408, 255738, 409, 1813	3590	24	16396	2.47386	1	0.0306919	0.0284142
GOTERM_BP_DIRECT	GO:0045742~positive regulation of epidermal growth factor receptor signaling pathway	13	0.348245	0.00222521	23636, 9001, 7311, 6654, 183, 356, 2852, 7316, 867, 207, 10551, 5329, 4318	3590	24	16396	2.47386	1	0.0306919	0.0284142
GOTERM_BP_DIRECT	GO:0045671~negative regulation of osteoclast differentiation	13	0.348245	0.00222521	7099, 5295, 7098, 84959, 1499, 796, 3565, 2200, 6348, 4763, 3635, 9607, 11006	3590	24	16396	2.47386	1	0.0306919	0.0284142
GOTERM_BP_DIRECT	GO:0051602~response to electrical stimulus	13	0.348245	0.00222521	929, 5020, 2056, 4914, 199, 3569, 10804, 5027, 6865, 1917, 4512, 6648, 6714	3590	24	16396	2.47386	1	0.0306919	0.0284142
GOTERM_BP_DIRECT	GO:0046326~positive regulation of glucose import	15	0.401822	0.00224584	5295, 4780, 7015, 5741, 9370, 5590, 5906, 3479, 55600, 1432, 3630, 207, 208, 3643, 3667	3590	30	16396	2.28357	1	0.0306919	0.0284142
GOTERM_BP_DIRECT	GO:0006611~protein export from nucleus	15	0.401822	0.00224584	11261, 5310, 29107, 7040, 8021, 2932, 1984, 103, 3313, 57510, 811, 7514, 54535, 5901, 10204	3590	30	16396	2.28357	1	0.0306919	0.0284142
GOTERM_BP_DIRECT	GO:0097193~intrinsic apoptotic signaling pathway	15	0.401822	0.00224584	8453, 8452, 8996, 4683, 7157, 5366, 81537, 581, 1191, 1654, 27113, 317, 54205, 56616, 2956	3590	30	16396	2.28357	1	0.0306919	0.0284142
GOTERM_BP_DIRECT	GO:0017144~drug metabolic process	14	0.375033	0.0022646	22978, 2053, 1558, 1557, 1544, 1555, 1543, 1576, 873, 1565, 2356, 54658, 1548, 1559	3590	27	16396	2.36814	1	0.0306919	0.0284142
GOTERM_BP_DIRECT	GO:0010800~positive regulation of peptidyl-threonine phosphorylation	14	0.375033	0.0022646	808, 3093, 7474, 5594, 7040, 2932, 1116, 1950, 566, 655, 57521, 2641, 801, 8767	3590	27	16396	2.36814	1	0.0306919	0.0284142
GOTERM_BP_DIRECT	GO:0042476~odontogenesis	14	0.375033	0.0022646	5066, 130497, 8313, 2263, 7291, 360, 7042, 6382, 5083, 362, 3624, 652, 80326, 632	3590	27	16396	2.36814	1	0.0306919	0.0284142
GOTERM_BP_DIRECT	GO:0042104~positive regulation of activated T cell proliferation	14	0.375033	0.0022646	2056, 29108, 3594, 3481, 3559, 177, 3558, 3479, 51561, 3565, 3146, 942, 6504, 3606	3590	27	16396	2.36814	1	0.0306919	0.0284142
GOTERM_MF_DIRECT	GO:0004704~NF-kappaB-inducing kinase activity	6	0.160729	0.00230272	9641, 5531, 238, 3654, 11035, 9020	3557	6	16472	4.63087	0.996801	0.0494205	0.047121
GOTERM_BP_DIRECT	GO:0097284~hepatocyte apoptotic process	9	0.241093	0.00230713	1788, 355, 598, 637, 3875, 6789, 3856, 5925, 2934	3590	13	16396	3.16186	1	0.0306919	0.0284142
GOTERM_BP_DIRECT	GO:0006957~complement activation, alternative pathway	9	0.241093	0.00230713	730, 1675, 5199, 731, 732, 3075, 727, 629, 718	3590	13	16396	3.16186	1	0.0306919	0.0284142
GOTERM_BP_DIRECT	GO:0006536~glutamate metabolic process	9	0.241093	0.00230713	162417, 2678, 2356, 2730, 6898, 5832, 2806, 2729, 2805	3590	13	16396	3.16186	1	0.0306919	0.0284142
GOTERM_BP_DIRECT	GO:0050435~beta-amyloid metabolic process	9	0.241093	0.00230713	25825, 3416, 8678, 9027, 5664, 5972, 4311, 23621, 1636	3590	13	16396	3.16186	1	0.0306919	0.0284142
GOTERM_BP_DIRECT	GO:0045651~positive regulation of macrophage differentiation	9	0.241093	0.00230713	5196, 1435, 796, 841, 3398, 8737, 5578, 3976, 5925	3590	13	16396	3.16186	1	0.0306919	0.0284142
GOTERM_BP_DIRECT	GO:2000273~positive regulation of receptor activity	9	0.241093	0.00230713	5581, 302, 26585, 10011, 3077, 1020, 5469, 10499, 3481	3590	13	16396	3.16186	1	0.0306919	0.0284142
GOTERM_BP_DIRECT	GO:0097296~activation of cysteine-type endopeptidase activity involved in apoptotic signaling pathway	9	0.241093	0.00230713	3717, 355, 356, 8743, 4088, 841, 8797, 8737, 581	3590	13	16396	3.16186	1	0.0306919	0.0284142
GOTERM_BP_DIRECT	GO:0010745~negative regulation of macrophage derived foam cell differentiation	9	0.241093	0.00230713	3690, 1401, 4792, 5465, 19, 3685, 9370, 5468, 9619	3590	13	16396	3.16186	1	0.0306919	0.0284142
GOTERM_BP_DIRECT	GO:0032479~regulation of type I interferon production	9	0.241093	0.00230713	22954, 81844, 7311, 340061, 7316, 3665, 11277, 6737, 51428	3590	13	16396	3.16186	1	0.0306919	0.0284142
GOTERM_BP_DIRECT	GO:0001916~positive regulation of T cell mediated cytotoxicity	9	0.241093	0.00230713	6375, 3106, 3105, 51561, 567, 5027, 3133, 3594, 3592	3590	13	16396	3.16186	1	0.0306919	0.0284142
GOTERM_BP_DIRECT	GO:0050872~white fat cell differentiation	9	0.241093	0.00230713	8864, 1488, 1487, 2167, 2255, 5468, 23411, 1050, 6591	3590	13	16396	3.16186	1	0.0306919	0.0284142
GOTERM_BP_DIRECT	GO:0002756~MyD88-independent toll-like receptor signaling pathway	9	0.241093	0.00230713	929, 7099, 7098, 7189, 79931, 7311, 7316, 23643, 148022	3590	13	16396	3.16186	1	0.0306919	0.0284142
GOTERM_BP_DIRECT	GO:0016045~detection of bacterium	9	0.241093	0.00230713	8993, 3106, 3105, 3126, 57115, 3123, 58484, 64127, 912	3590	13	16396	3.16186	1	0.0306919	0.0284142
GOTERM_BP_DIRECT	GO:2000573~positive regulation of DNA biosynthetic process	9	0.241093	0.00230713	5063, 3082, 50507, 4609, 5155, 5159, 2185, 409, 6714	3590	13	16396	3.16186	1	0.0306919	0.0284142
GOTERM_BP_DIRECT	GO:0050901~leukocyte tethering or rolling	9	0.241093	0.00230713	7124, 6401, 7412, 6403, 50512, 3676, 3952, 3688, 6093	3590	13	16396	3.16186	1	0.0306919	0.0284142
GOTERM_BP_DIRECT	GO:0061029~eyelid development in camera-type eye	9	0.241093	0.00230713	3624, 57822, 6654, 3066, 7291, 3065, 1956, 7020, 3725	3590	13	16396	3.16186	1	0.0306919	0.0284142
GOTERM_BP_DIRECT	GO:0060644~mammary gland epithelial cell differentiation	9	0.241093	0.00230713	6608, 2247, 4255, 3664, 2066, 207, 208, 1051, 5727	3590	13	16396	3.16186	1	0.0306919	0.0284142
GOTERM_MF_DIRECT	GO:0008022~protein C-terminus binding	57	1.52692	0.00231937	4691, 9463, 8655, 7520, 1022, 2033, 7082, 1063, 1613, 991, 3717, 6907, 675, 1499, 8844, 10971, 10413, 4261, 11190, 7014, 23411, 481, 488, 6714, 25, 5562, 8554, 5245, 23426, 774, 10519, 6721, 859, 3932, 4988, 4747, 6925, 7153, 7431, 6386, 7155, 4288, 7874, 2067, 3397, 26986, 2064, 1490, 6382, 1487, 468, 11331, 5888, 4436, 7704, 5604, 8915	3557	182	16472	1.45033	0.996932	0.0494205	0.047121
GOTERM_BP_DIRECT	GO:0001764~neuron migration	37	0.99116	0.00232391	9201, 6792, 8851, 5663, 7080, 2011, 3320, 1020, 259266, 2625, 2624, 1499, 2621, 23284, 1233, 92737, 8846, 558, 6900, 8829, 4208, 5592, 7155, 8941, 6387, 7291, 2260, 581, 54541, 4915, 2534, 1641, 79625, 4137, 4139, 5747, 5649	3590	105	16396	1.60937	1	0.0308659	0.0285752
GOTERM_BP_DIRECT	GO:0045444~fat cell differentiation	28	0.750067	0.00233284	8651, 8013, 22954, 8554, 2033, 8091, 3164, 8195, 27241, 2867, 595, 2662, 6720, 9314, 1052, 1050, 6041, 2932, 2876, 3589, 79689, 1386, 56729, 30812, 51752, 208, 5469, 79828	3590	73	16396	1.75178	1	0.0309352	0.0286394
GOTERM_CC_DIRECT	GO:0005838~proteasome regulatory particle	8	0.214305	0.00237931	9861, 5718, 5707, 5719, 5708, 5700, 5713, 5714	3662	11	17735	3.52217	0.931919	0.0304984	0.0279569
GOTERM_BP_DIRECT	GO:0007173~epidermal growth factor receptor signaling pathway	23	0.616126	0.00240305	9564, 5284, 5295, 5286, 5781, 25, 6662, 4893, 6654, 7039, 2185, 7040, 5290, 374, 1950, 2069, 867, 7429, 5747, 6868, 6714, 1956, 3845	3590	56	16396	1.87579	1	0.0318156	0.0294545
GOTERM_CC_DIRECT	GO:0000118~histone deacetylase complex	16	0.42861	0.002412	55809, 9541, 9734, 8841, 9611, 3065, 3094, 79885, 6907, 83933, 51564, 55869, 9759, 10013, 9219, 10014	3662	35	17735	2.21393	0.93439	0.0305701	0.0280226
GOTERM_BP_DIRECT	GO:0045084~positive regulation of interleukin-12 biosynthetic process	6	0.160729	0.0024605	7099, 7189, 3458, 5970, 4050, 3659	3590	6	16396	4.56713	1	0.0320672	0.0296875
GOTERM_BP_DIRECT	GO:0061037~negative regulation of cartilage development	6	0.160729	0.0024605	2487, 3952, 9241, 7042, 7481, 5914	3590	6	16396	4.56713	1	0.0320672	0.0296875
GOTERM_BP_DIRECT	GO:0071636~positive regulation of transforming growth factor beta production	6	0.160729	0.0024605	6375, 5345, 4179, 5743, 947, 3965	3590	6	16396	4.56713	1	0.0320672	0.0296875
GOTERM_BP_DIRECT	GO:0060789~hair follicle placode formation	6	0.160729	0.0024605	2778, 1896, 1499, 998, 3066, 3065	3590	6	16396	4.56713	1	0.0320672	0.0296875
GOTERM_BP_DIRECT	GO:1903672~positive regulation of sprouting angiogenesis	6	0.160729	0.0024605	3716, 2247, 2246, 3146, 28514, 3678	3590	6	16396	4.56713	1	0.0320672	0.0296875
GOTERM_BP_DIRECT	GO:0060430~lung saccule development	6	0.160729	0.0024605	10728, 2255, 7080, 1385, 171023, 2627	3590	6	16396	4.56713	1	0.0320672	0.0296875
GOTERM_BP_DIRECT	GO:0048525~negative regulation of viral process	6	0.160729	0.0024605	4153, 60489, 325, 4057, 164668, 200316	3590	6	16396	4.56713	1	0.0320672	0.0296875
GOTERM_BP_DIRECT	GO:2000553~positive regulation of T-helper 2 cell cytokine production	6	0.160729	0.0024605	2625, 3569, 6375, 91543, 114548, 5590	3590	6	16396	4.56713	1	0.0320672	0.0296875
GOTERM_BP_DIRECT	GO:0002740~negative regulation of cytokine secretion involved in immune response	6	0.160729	0.0024605	10859, 7124, 335, 336, 3586, 284	3590	6	16396	4.56713	1	0.0320672	0.0296875
GOTERM_BP_DIRECT	GO:0030816~positive regulation of cAMP metabolic process	6	0.160729	0.0024605	6373, 2833, 4283, 5196, 1113, 3627	3590	6	16396	4.56713	1	0.0320672	0.0296875
GOTERM_MF_DIRECT	GO:0019789~SUMO transferase activity	10	0.267881	0.00258901	1029, 8535, 8554, 51564, 7329, 6613, 9063, 4193, 79594, 5903	3557	16	16472	2.89429	0.998436	0.0546984	0.0521533
GOTERM_BP_DIRECT	GO:0045727~positive regulation of translation	22	0.589338	0.00264417	7057, 6198, 5594, 5595, 9775, 26986, 6191, 27303, 23367, 2185, 2064, 1019, 3569, 1654, 940, 23185, 2475, 3872, 7349, 602, 6659, 4869	3590	53	16396	1.89579	1	0.0344072	0.0318538
GOTERM_MF_DIRECT	GO:0050661~NADP binding	16	0.42861	0.00271233	9563, 4199, 4552, 3156, 3417, 2597, 1719, 5447, 4842, 7108, 4843, 4524, 847, 2936, 2539, 4846	3557	34	16472	2.17923	0.99885	0.0568221	0.0541782
GOTERM_MF_DIRECT	GO:0003700~transcription factor activity, sequence-specific DNA binding	241	6.45593	0.00275585	4297, 2305, 6908, 10538, 4609, 2302, 2300, 3091, 7694, 132625, 22882, 3097, 367, 4851, 3642, 4613, 6493, 6495, 6256, 3661, 3662, 23028, 6928, 6927, 30009, 9757, 3659, 6925, 8320, 7474, 4087, 4088, 5970, 4089, 6940, 5971, 2100, 1487, 3663, 3664, 3665, 10765, 83482, 6936, 4097, 9541, 8216, 4772, 2353, 1385, 4092, 4094, 1811, 1499, 6942, 2908, 6941, 10732, 7494, 55809, 4780, 5990, 5991, 4661, 4782, …	3557	949	16472	1.17602	0.998969	0.0572528	0.0545888
GOTERM_BP_DIRECT	GO:0030326~embryonic limb morphogenesis	18	0.482186	0.00276248	8200, 65057, 4154, 6497, 5663, 2254, 2260, 7042, 6927, 100131390, 57167, 3226, 51176, 655, 2201, 26585, 8626, 5727	3590	40	16396	2.05521	1	0.0358907	0.0332272
GOTERM_BP_DIRECT	GO:1902187~negative regulation of viral release from host cell	10	0.267881	0.00286627	22954, 5371, 51652, 5987, 10155, 6737, 81603, 81559, 85363, 7706	3590	16	16396	2.85446	1	0.0367244	0.033999
GOTERM_BP_DIRECT	GO:0030949~positive regulation of vascular endothelial growth factor receptor signaling pathway	10	0.267881	0.00286627	3091, 3690, 7422, 2321, 3553, 2255, 7423, 2254, 5579, 3678	3590	16	16396	2.85446	1	0.0367244	0.033999
GOTERM_BP_DIRECT	GO:0090280~positive regulation of calcium ion import	10	0.267881	0.00286627	3958, 6781, 5155, 6387, 2641, 7349, 5159, 6348, 6347, 1392	3590	16	16396	2.85446	1	0.0367244	0.033999
GOTERM_BP_DIRECT	GO:0030301~cholesterol transport	10	0.267881	0.00286627	1080, 29881, 3949, 335, 338, 4864, 857, 3931, 948, 10577	3590	16	16396	2.85446	1	0.0367244	0.033999
GOTERM_BP_DIRECT	GO:0007220~Notch receptor processing	10	0.267881	0.00286627	102, 54567, 5663, 5664, 92737, 28514, 182, 4854, 6868, 3714	3590	16	16396	2.85446	1	0.0367244	0.033999
GOTERM_BP_DIRECT	GO:0080111~DNA demethylation	10	0.267881	0.00286627	27350, 57379, 80312, 200315, 8846, 339, 328, 200316, 54790, 10930	3590	16	16396	2.85446	1	0.0367244	0.033999
GOTERM_BP_DIRECT	GO:0090026~positive regulation of monocyte chemotaxis	10	0.267881	0.00286627	199, 5054, 6352, 729230, 6387, 3146, 6347, 1230, 284340, 3627	3590	16	16396	2.85446	1	0.0367244	0.033999
GOTERM_BP_DIRECT	GO:0010613~positive regulation of cardiac muscle hypertrophy	10	0.267881	0.00286627	8013, 3479, 1025, 8654, 1906, 5578, 3572, 6548, 183, 142	3590	16	16396	2.85446	1	0.0367244	0.033999
GOTERM_BP_DIRECT	GO:0048240~sperm capacitation	10	0.267881	0.00286627	1811, 1080, 65010, 54760, 5566, 116369, 5414, 1738, 347732, 257062	3590	16	16396	2.85446	1	0.0367244	0.033999
GOTERM_MF_DIRECT	GO:0005504~fatty acid binding	11	0.294669	0.00288211	341, 213, 5375, 2169, 2168, 128, 5730, 2167, 5467, 6622, 3172	3557	19	16472	2.68103	0.999248	0.0588943	0.056154
GOTERM_MF_DIRECT	GO:0042288~MHC class I protein binding	11	0.294669	0.00288211	6890, 6892, 498, 22914, 10859, 7415, 3133, 10288, 51744, 925, 926	3557	19	16472	2.68103	0.999248	0.0588943	0.056154
GOTERM_BP_DIRECT	GO:0006006~glucose metabolic process	26	0.696491	0.00289927	9563, 5166, 5562, 6652, 7124, 3481, 2548, 4609, 773, 1432, 2200, 3630, 3952, 1737, 8402, 9370, 5290, 680, 1390, 4938, 347, 2597, 5467, 207, 208, 2539	3590	67	16396	1.77232	1	0.0370903	0.0343377
GOTERM_CC_DIRECT	GO:0031988~membrane-bounded vesicle	9	0.241093	0.0029516	65010, 55244, 6696, 1443, 632, 655, 649, 4547, 3381	3662	14	17735	3.11335	0.964362	0.0365869	0.033538
GOTERM_CC_DIRECT	GO:0031091~platelet alpha granule	9	0.241093	0.0029516	7450, 7057, 2244, 2266, 5104, 2243, 6678, 6812, 5270	3662	14	17735	3.11335	0.964362	0.0365869	0.033538
GOTERM_BP_DIRECT	GO:0035094~response to nicotine	17	0.455398	0.00295224	6770, 6531, 7412, 1385, 3596, 3066, 3162, 551, 1139, 596, 1137, 1268, 1134, 89832, 1906, 836, 1813	3590	37	16396	2.09841	1	0.0376523	0.0348581
GOTERM_BP_DIRECT	GO:0045786~negative regulation of cell cycle	17	0.455398	0.00295224	6196, 4221, 5796, 1021, 1020, 3164, 7040, 2625, 650, 3624, 26471, 3623, 652, 10859, 864, 655, 5743	3590	37	16396	2.09841	1	0.0376523	0.0348581
GOTERM_BP_DIRECT	GO:0035556~intracellular signal transduction	112	3.00027	0.00304885	6196, 7046, 5663, 5664, 64798, 3084, 6195, 1613, 113, 5777, 10411, 3635, 7297, 3925, 640, 1906, 30811, 22858, 5562, 5563, 29, 7984, 23268, 246329, 23426, 29760, 3815, 23263, 814, 5319, 9771, 6386, 4087, 5331, 4089, 4882, 1490, 660, 1124, 1641, 941, 5600, 5603, 3702, 11215, 5580, 23526, 5581, 5582, 5583, 4772, 5587, 3162, 6271, 3716, 3717, 1654, 3718, 3315, 2984, 5578, 10332, 8569, 8844, 5579, 678…	3590	400	16396	1.2788	1	0.0388251	0.0359438
GOTERM_MF_DIRECT	GO:0005543~phospholipid binding	31	0.830431	0.0031071	5320, 129401, 5444, 23541, 2152, 350, 335, 336, 2168, 338, 6622, 2806, 9619, 23636, 23218, 23659, 19, 1373, 2733, 345, 301, 2159, 84557, 348, 8439, 51411, 6710, 308, 5009, 55937, 2516	3557	86	16472	1.66927	0.999571	0.062375	0.0594726
GOTERM_BP_DIRECT	GO:0043401~steroid hormone mediated signaling pathway	23	0.616126	0.0031166	8013, 8431, 6097, 5241, 9970, 7067, 6256, 7421, 5465, 2099, 3164, 3172, 5916, 652, 2852, 51176, 655, 5467, 5468, 8856, 4306, 2516, 5914	3590	57	16396	1.84288	1	0.0396274	0.0366865
GOTERM_MF_DIRECT	GO:0043394~proteoglycan binding	8	0.214305	0.00312751	51816, 1514, 1513, 7057, 1520, 2220, 1508, 4811	3557	11	16472	3.3679	0.999593	0.062375	0.0594726
GOTERM_MF_DIRECT	GO:0050786~RAGE receptor binding	8	0.214305	0.00312751	6285, 6275, 6286, 2357, 6279, 3146, 6280, 6283	3557	11	16472	3.3679	0.999593	0.062375	0.0594726
GOTERM_BP_DIRECT	GO:0043488~regulation of mRNA stability	36	0.964372	0.00313556	9861, 5580, 11340, 9261, 23404, 5718, 5719, 3315, 799, 5698, 7316, 7514, 5578, 5710, 10197, 5711, 5713, 5714, 5393, 7356, 7311, 8741, 26986, 23016, 8021, 6041, 5707, 5708, 5709, 3304, 3303, 328, 207, 5721, 5688, 5700	3590	103	16396	1.59628	1	0.0398077	0.0368535
GOTERM_BP_DIRECT	GO:0045860~positive regulation of protein kinase activity	20	0.535762	0.00317838	6366, 7124, 1020, 2185, 3491, 10899, 1600, 5906, 1435, 1236, 2621, 566, 2641, 2069, 920, 5788, 27040, 5747, 5649, 5606	3590	47	16396	1.94346	1	0.0402901	0.0373001
GOTERM_BP_DIRECT	GO:0019370~leukotriene biosynthetic process	11	0.294669	0.00321316	728441, 2678, 2205, 6850, 5322, 2681, 728226, 240, 5319, 241, 92086	3590	19	16396	2.64413	1	0.040363	0.0373676
GOTERM_BP_DIRECT	GO:0033141~positive regulation of peptidyl-serine phosphorylation of STAT protein	11	0.294669	0.00321316	3439, 56832, 3458, 3447, 3456, 3444, 3442, 3440, 3451, 338376, 3976	3590	19	16396	2.64413	1	0.040363	0.0373676
GOTERM_BP_DIRECT	GO:0050771~negative regulation of axonogenesis	11	0.294669	0.00321316	5728, 1600, 387, 8831, 2048, 2664, 5663, 4974, 84894, 7070, 5747	3590	19	16396	2.64413	1	0.040363	0.0373676
GOTERM_BP_DIRECT	GO:0051968~positive regulation of synaptic transmission, glutamatergic	11	0.294669	0.00321316	4914, 9378, 135, 54413, 594857, 57555, 5743, 22871, 2185, 5649, 1956	3590	19	16396	2.64413	1	0.040363	0.0373676
GOTERM_BP_DIRECT	GO:0001894~tissue homeostasis	11	0.294669	0.00321316	29123, 231, 22954, 2778, 6662, 6794, 58476, 947, 1490, 31, 5925	3590	19	16396	2.64413	1	0.040363	0.0373676
GOTERM_BP_DIRECT	GO:0043393~regulation of protein binding	11	0.294669	0.00321316	84525, 7046, 5663, 5566, 9759, 26119, 5081, 6714, 10014, 284, 351	3590	19	16396	2.64413	1	0.040363	0.0373676
GOTERM_CC_DIRECT	GO:0022624~proteasome accessory complex	10	0.267881	0.00323165	9861, 5718, 5707, 5719, 5708, 5709, 5710, 5700, 5711, 5714	3662	17	17735	2.84881	0.97404	0.0396099	0.0363091
GOTERM_BP_DIRECT	GO:0030073~insulin secretion	15	0.401822	0.00327945	4087, 9699, 54097, 9451, 2281, 51083, 6928, 169026, 6927, 3557, 2864, 301, 5798, 3952, 818	3590	31	16396	2.2099	1	0.0410103	0.0379669
GOTERM_BP_DIRECT	GO:0001975~response to amphetamine	15	0.401822	0.00327945	808, 5020, 9734, 3066, 3065, 3251, 3383, 1787, 135, 1269, 801, 6647, 1813, 2902, 5903	3590	31	16396	2.2099	1	0.0410103	0.0379669
GOTERM_BP_DIRECT	GO:0031667~response to nutrient levels	15	0.401822	0.00327945	5076, 23408, 6652, 5444, 1471, 7350, 7481, 4914, 3601, 6647, 2937, 51548, 4316, 6714, 32	3590	31	16396	2.2099	1	0.0410103	0.0379669
GOTERM_CC_DIRECT	GO:0005578~proteinaceous extracellular matrix	75	2.00911	0.00330131	653509, 7045, 5265, 5266, 4256, 7040, 7481, 10855, 10417, 3959, 80326, 284217, 1299, 3956, 7450, 7373, 6441, 6366, 4585, 4146, 729238, 3491, 1101, 6678, 84034, 60484, 649, 4856, 11117, 9509, 7980, 7422, 2331, 63923, 1116, 652, 2006, 2246, 2201, 2200, 811, 3730, 10631, 64094, 64093, 1834, 7077, 7076, 89780, 7078, 7474, 11093, 6586, 4320, 5212, 4321, 4322, 1293, 1292, 1490, 9173, 2734, 2335, 79625,…	3662	267	17735	1.36039	0.976008	0.0396099	0.0363091
GOTERM_CC_DIRECT	GO:0033116~endoplasmic reticulum-Golgi intermediate compartment membrane	24	0.642915	0.00333407	10282, 5265, 9027, 7039, 5862, 64689, 2153, 1075, 254263, 23423, 121665, 79058, 374, 81876, 1522, 54732, 24141, 1453, 2157, 10959, 3630, 966, 113451, 1604	3662	64	17735	1.81612	0.976881	0.0396099	0.0363091
GOTERM_CC_DIRECT	GO:0031225~anchored component of membrane	37	0.99116	0.00333594	64174, 5067, 8875, 1088, 1087, 250, 2765, 4907, 55600, 57126, 417, 6900, 53942, 8000, 4680, 7035, 137797, 4684, 7512, 4061, 10942, 684, 1368, 2215, 762, 1048, 55997, 965, 5621, 4974, 2817, 50863, 5329, 1604, 147719, 43, 2813	3662	113	17735	1.58576	0.97693	0.0396099	0.0363091
GOTERM_BP_DIRECT	GO:0006509~membrane protein ectodomain proteolysis	12	0.321457	0.0033884	121665, 25825, 81502, 102, 5663, 5664, 5027, 51752, 23621, 6868, 1605, 4627	3590	22	16396	2.49116	1	0.0412497	0.0381885
GOTERM_BP_DIRECT	GO:0002286~T cell activation involved in immune response	12	0.321457	0.0033884	3439, 56832, 3447, 3456, 3444, 5663, 3442, 911, 3440, 3451, 338376, 2150	3590	22	16396	2.49116	1	0.0412497	0.0381885
GOTERM_BP_DIRECT	GO:0090103~cochlea morphogenesis	12	0.321457	0.0033884	7253, 5076, 57822, 3249, 7474, 6495, 6662, 2487, 5456, 6899, 5879, 2736	3590	22	16396	2.49116	1	0.0412497	0.0381885
GOTERM_BP_DIRECT	GO:0001502~cartilage condensation	12	0.321457	0.0033884	2249, 7067, 6662, 1432, 5310, 4256, 4920, 649, 4613, 1490, 7042, 56914	3590	22	16396	2.49116	1	0.0412497	0.0381885
GOTERM_BP_DIRECT	GO:2001243~negative regulation of intrinsic apoptotic signaling pathway	12	0.321457	0.0033884	596, 10625, 1654, 598, 2641, 9479, 8725, 5329, 6714, 10105, 4170, 4318	3590	22	16396	2.49116	1	0.0412497	0.0381885
GOTERM_BP_DIRECT	GO:0060045~positive regulation of cardiac muscle cell proliferation	12	0.321457	0.0033884	891, 983, 2247, 1432, 4851, 2254, 2066, 2263, 2260, 4208, 2627, 3084	3590	22	16396	2.49116	1	0.0412497	0.0381885
GOTERM_BP_DIRECT	GO:0050690~regulation of defense response to virus by virus	14	0.375033	0.00338884	919, 10053, 3055, 1173, 55690, 5062, 2534, 3105, 940, 567, 920, 5879, 3932, 926	3590	28	16396	2.28357	1	0.0412497	0.0381885
GOTERM_BP_DIRECT	GO:0090200~positive regulation of release of cytochrome c from mitochondria	14	0.375033	0.00338884	8743, 7157, 5366, 29108, 581, 10018, 2852, 27113, 578, 637, 638, 5329, 10105, 4318	3590	28	16396	2.28357	1	0.0412497	0.0381885
GOTERM_BP_DIRECT	GO:0043542~endothelial cell migration	14	0.375033	0.00338884	7046, 5175, 6286, 6772, 8742, 5290, 5728, 387, 1545, 796, 3689, 1803, 5747, 4846	3590	28	16396	2.28357	1	0.0412497	0.0381885
GOTERM_BP_DIRECT	GO:0007281~germ cell development	14	0.375033	0.00338884	6045, 6198, 581, 285, 10658, 342977, 652, 598, 2475, 207, 1618, 4436, 639, 5914	3590	28	16396	2.28357	1	0.0412497	0.0381885
GOTERM_BP_DIRECT	GO:0016358~dendrite development	14	0.375033	0.00338884	5063, 5592, 4131, 8831, 7940, 3066, 26039, 23426, 351, 1600, 655, 4204, 8829, 5649	3590	28	16396	2.28357	1	0.0412497	0.0381885
GOTERM_BP_DIRECT	GO:0001775~cell activation	8	0.214305	0.00340245	7076, 5154, 3479, 5156, 137797, 6348, 966, 1471	3590	11	16396	3.32155	1	0.0412497	0.0381885
GOTERM_BP_DIRECT	GO:0032703~negative regulation of interleukin-2 production	8	0.214305	0.00340245	2625, 10524, 6375, 84868, 51564, 5621, 7128, 50943	3590	11	16396	3.32155	1	0.0412497	0.0381885
GOTERM_BP_DIRECT	GO:0001823~mesonephros development	8	0.214305	0.00340245	2625, 5076, 652, 130497, 655, 5972, 2255, 7704	3590	11	16396	3.32155	1	0.0412497	0.0381885
GOTERM_BP_DIRECT	GO:0010759~positive regulation of macrophage chemotaxis	8	0.214305	0.00340245	7057, 1435, 6352, 6347, 59341, 728, 284340, 719	3590	11	16396	3.32155	1	0.0412497	0.0381885
GOTERM_BP_DIRECT	GO:0060445~branching involved in salivary gland morphogenesis	8	0.214305	0.00340245	3569, 655, 2263, 2252, 2260, 1605, 3911, 7052	3590	11	16396	3.32155	1	0.0412497	0.0381885
GOTERM_BP_DIRECT	GO:0002446~neutrophil mediated immunity	8	0.214305	0.00340245	6372, 3569, 6374, 51135, 3570, 6868, 5319, 1636	3590	11	16396	3.32155	1	0.0412497	0.0381885
GOTERM_BP_DIRECT	GO:0030857~negative regulation of epithelial cell differentiation	8	0.214305	0.00340245	6608, 595, 3458, 6662, 130497, 28514, 857, 10413	3590	11	16396	3.32155	1	0.0412497	0.0381885
GOTERM_BP_DIRECT	GO:0010941~regulation of cell death	8	0.214305	0.00340245	3726, 3727, 3304, 3303, 3621, 84273, 29957, 3725	3590	11	16396	3.32155	1	0.0412497	0.0381885
GOTERM_BP_DIRECT	GO:0045824~negative regulation of innate immune response	8	0.214305	0.00340245	7301, 7128, 730249, 11213, 1813, 79671, 79594, 79132	3590	11	16396	3.32155	1	0.0412497	0.0381885
GOTERM_BP_DIRECT	GO:0071372~cellular response to follicle-stimulating hormone stimulus	8	0.214305	0.00340245	3624, 6770, 2730, 4851, 10891, 5447, 2729, 1946	3590	11	16396	3.32155	1	0.0412497	0.0381885
GOTERM_BP_DIRECT	GO:2001235~positive regulation of apoptotic signaling pathway	13	0.348245	0.00343477	5580, 7046, 6188, 1075, 5728, 1512, 135, 3456, 8626, 317, 5601, 4776, 5008	3590	25	16396	2.37491	1	0.0413412	0.0382732
GOTERM_BP_DIRECT	GO:0002040~sprouting angiogenesis	13	0.348245	0.00343477	7010, 7057, 11082, 2022, 2185, 284, 51176, 57674, 998, 84870, 4851, 5228, 8829	3590	25	16396	2.37491	1	0.0413412	0.0382732
GOTERM_BP_DIRECT	GO:0071158~positive regulation of cell cycle arrest	13	0.348245	0.00343477	7157, 8851, 5311, 3398, 8091, 115426, 7040, 7161, 672, 1029, 5566, 3642, 2627	3590	25	16396	2.37491	1	0.0413412	0.0382732
GOTERM_BP_DIRECT	GO:0060135~maternal process involved in female pregnancy	13	0.348245	0.00343477	5066, 181, 383, 285, 231, 84868, 113, 1268, 2475, 6347, 4316, 3965, 3429	3590	25	16396	2.37491	1	0.0413412	0.0382732
GOTERM_BP_DIRECT	GO:0051899~membrane depolarization	13	0.348245	0.00343477	6331, 4297, 9370, 5590, 773, 135, 1137, 774, 777, 5027, 1906, 857, 3725	3590	25	16396	2.37491	1	0.0413412	0.0382732
GOTERM_BP_DIRECT	GO:0006094~gluconeogenesis	19	0.508974	0.00346855	5230, 7167, 8864, 8402, 6576, 2023, 5091, 4190, 2821, 1468, 2026, 467, 2597, 468, 10891, 2806, 2805, 10993, 2538	3590	44	16396	1.97217	1	0.0416876	0.0385938
GOTERM_CC_DIRECT	GO:0016342~catenin complex	7	0.187517	0.00362569	5818, 1499, 324, 1000, 10297, 999, 4092	3662	9	17735	3.76676	0.983381	0.0421627	0.0386492
GOTERM_CC_DIRECT	GO:0005577~fibrinogen complex	7	0.187517	0.00362569	7057, 2335, 5345, 2244, 2266, 2243, 10875	3662	9	17735	3.76676	0.983381	0.0421627	0.0386492
GOTERM_MF_DIRECT	GO:0005507~copper ion binding	22	0.589338	0.00374189	5066, 26, 49, 7157, 3552, 2153, 283, 6283, 1356, 213, 23394, 2157, 314, 5621, 150684, 6622, 6647, 538, 2817, 4513, 7306, 8639	3557	55	16472	1.85235	0.999912	0.074036	0.0705911
GOTERM_BP_DIRECT	GO:0075733~intracellular transport of virus	21	0.56255	0.00380794	23636, 9397, 7311, 129401, 23511, 8021, 8480, 79023, 7251, 3837, 79720, 3838, 4928, 30835, 7316, 7514, 79902, 55746, 10332, 5901, 5903	3590	51	16396	1.88058	1	0.0457008	0.0423093
GOTERM_MF_DIRECT	GO:0004707~MAP kinase activity	9	0.241093	0.00397381	5594, 5595, 6300, 1432, 5599, 5600, 5601, 5602, 5603	3557	14	16472	2.97699	0.999951	0.0773963	0.073795
GOTERM_MF_DIRECT	GO:0034185~apolipoprotein binding	9	0.241093	0.00397381	5340, 3990, 4035, 821, 19, 4137, 4018, 255738, 949	3557	14	16472	2.97699	0.999951	0.0773963	0.073795
GOTERM_BP_DIRECT	GO:0034446~substrate adhesion-dependent cell spreading	17	0.455398	0.00407711	7010, 3690, 25, 7301, 5861, 2041, 1942, 3611, 2335, 79834, 3685, 558, 10461, 3676, 5879, 6714, 3911	3590	38	16396	2.04319	1	0.0487209	0.0451053
GOTERM_BP_DIRECT	GO:0060291~long-term synaptic potentiation	17	0.455398	0.00407711	6285, 5594, 2670, 22871, 2185, 1392, 5270, 5590, 5728, 4915, 673, 10769, 54413, 2695, 6622, 4204, 5649	3590	38	16396	2.04319	1	0.0487209	0.0451053
GOTERM_BP_DIRECT	GO:0001657~ureteric bud development	17	0.455398	0.00407711	4087, 6495, 4088, 130497, 2263, 2296, 7040, 2260, 4092, 6382, 4072, 652, 168667, 655, 847, 5979, 5914	3590	38	16396	2.04319	1	0.0487209	0.0451053
GOTERM_CC_DIRECT	GO:0009925~basal plasma membrane	14	0.375033	0.00412577	7010, 3680, 4233, 5311, 26119, 4070, 64805, 362, 10998, 634, 7018, 659, 3655, 947	3662	30	17735	2.26006	0.990567	0.0474885	0.0435311
GOTERM_BP_DIRECT	GO:0060070~canonical Wnt signaling pathway	30	0.803643	0.00433555	6794, 5663, 6591, 7481, 6608, 595, 5916, 4609, 6907, 1499, 1950, 998, 7855, 4624, 4041, 89780, 7474, 4088, 64321, 6862, 9314, 6382, 5728, 2932, 324, 51176, 120892, 7403, 6932, 6659	3590	83	16396	1.65077	1	0.0514446	0.0476268
GOTERM_MF_DIRECT	GO:0004712~protein serine/threonine/tyrosine kinase activity	14	0.375033	0.00434312	6790, 6196, 5582, 6198, 5563, 1195, 6195, 5566, 6446, 207, 10188, 1859, 5604, 5649	3557	29	16472	2.23559	0.999981	0.0835914	0.0797019
GOTERM_BP_DIRECT	GO:0071361~cellular response to ethanol	9	0.241093	0.00435438	1536, 1788, 5581, 113, 5562, 6354, 6688, 54658, 6648	3590	14	16396	2.93601	1	0.0514446	0.0476268
GOTERM_BP_DIRECT	GO:0032461~positive regulation of protein oligomerization	9	0.241093	0.00435438	3416, 9447, 3512, 7157, 5366, 4312, 4314, 637, 581	3590	14	16396	2.93601	1	0.0514446	0.0476268
GOTERM_BP_DIRECT	GO:0031929~TOR signaling	9	0.241093	0.00435438	2625, 6198, 57521, 2475, 55704, 253260, 23367, 1978, 6194	3590	14	16396	2.93601	1	0.0514446	0.0476268
GOTERM_BP_DIRECT	GO:0010875~positive regulation of cholesterol efflux	9	0.241093	0.00435438	4792, 4035, 5444, 348, 19, 9370, 23411, 9619, 5727	3590	14	16396	2.93601	1	0.0514446	0.0476268
GOTERM_BP_DIRECT	GO:1902230~negative regulation of intrinsic apoptotic signaling pathway in response to DNA damage	9	0.241093	0.00435438	22954, 57007, 7178, 598, 6387, 1032, 6615, 6591, 1191	3590	14	16396	2.93601	1	0.0514446	0.0476268
GOTERM_BP_DIRECT	GO:0019079~viral genome replication	9	0.241093	0.00435438	1488, 2621, 1487, 30835, 4774, 7415, 6347, 10332, 10663	3590	14	16396	2.93601	1	0.0514446	0.0476268
GOTERM_BP_DIRECT	GO:0043923~positive regulation by host of viral transcription	9	0.241093	0.00435438	1105, 3249, 7023, 6597, 51176, 6598, 2033, 64710, 3725	3590	14	16396	2.93601	1	0.0514446	0.0476268
GOTERM_MF_DIRECT	GO:0005160~transforming growth factor beta receptor binding	18	0.482186	0.00435896	8200, 9573, 4087, 4088, 65997, 116844, 7040, 7042, 4838, 650, 3624, 3623, 652, 268, 655, 2662, 9518, 649	3557	42	16472	1.98466	0.999981	0.0835914	0.0797019
GOTERM_BP_DIRECT	GO:0000723~telomere maintenance	16	0.42861	0.00438152	65057, 7015, 5111, 7520, 7014, 4683, 80119, 23049, 472, 10714, 10728, 80169, 6117, 328, 5424, 5976	3590	35	16396	2.08783	1	0.051619	0.0477883
GOTERM_BP_DIRECT	GO:0042594~response to starvation	16	0.42861	0.00438152	34, 5166, 38, 1373, 1723, 133, 114131, 2642, 2641, 2695, 10891, 54658, 867, 5468, 1649, 8408	3590	35	16396	2.08783	1	0.051619	0.0477883
GOTERM_MF_DIRECT	GO:0004180~carboxypeptidase activity	10	0.267881	0.0044546	10404, 84735, 1368, 5476, 1363, 55748, 1360, 5547, 59272, 1636	3557	17	16472	2.72404	0.999985	0.0847735	0.0808289
GOTERM_MF_DIRECT	GO:0001968~fibronectin binding	13	0.348245	0.00454694	3690, 7057, 131578, 7422, 3486, 1490, 1514, 1513, 1520, 3685, 3676, 3688, 4018	3557	26	16472	2.31543	0.999988	0.0849408	0.0809884
GOTERM_BP_DIRECT	GO:0007613~memory	24	0.642915	0.00455174	6285, 5020, 4593, 8997, 5663, 6532, 1385, 3274, 1051, 5728, 1139, 1524, 10769, 2237, 1268, 3269, 2695, 89832, 5743, 9757, 3776, 3678, 4835, 123803	3590	62	16396	1.76792	1	0.0535487	0.0495748
GOTERM_MF_DIRECT	GO:0030957~Tat protein binding	7	0.187517	0.00460606	22954, 6597, 6598, 28514, 60, 29969, 4869	3557	9	16472	3.60179	0.99999	0.0849408	0.0809884
GOTERM_BP_DIRECT	GO:0060048~cardiac muscle contraction	19	0.508974	0.004616	6331, 8557, 8048, 7137, 7423, 5290, 481, 7273, 2548, 5608, 4607, 476, 2475, 7139, 6426, 4624, 4625, 6901, 3757	3590	45	16396	1.92834	1	0.0542283	0.0502039
GOTERM_MF_DIRECT	GO:0001158~enhancer sequence-specific DNA binding	11	0.294669	0.0046585	2625, 121643, 2624, 5460, 7494, 2623, 6662, 1386, 7528, 2626, 140628	3557	20	16472	2.54698	0.999991	0.0849408	0.0809884
GOTERM_MF_DIRECT	GO:1990841~promoter-specific chromatin binding	11	0.294669	0.0046585	1874, 1786, 2146, 10891, 257101, 3297, 55636, 10155, 1958, 639, 4901	3557	20	16472	2.54698	0.999991	0.0849408	0.0809884
GOTERM_MF_DIRECT	GO:0017134~fibroblast growth factor binding	12	0.321457	0.00466782	2734, 7057, 3690, 6331, 9365, 6187, 6223, 3685, 10563, 2263, 2817, 2260	3557	23	16472	2.41611	0.999991	0.0849408	0.0809884
GOTERM_MF_DIRECT	GO:0000982~transcription factor activity, RNA polymerase II core promoter proximal region sequence-specific binding	12	0.321457	0.00466782	9575, 10538, 467, 2354, 2353, 56938, 8061, 3665, 406, 116071, 7020, 3725	3557	23	16472	2.41611	0.999991	0.0849408	0.0809884
GOTERM_BP_DIRECT	GO:0050873~brown fat cell differentiation	15	0.401822	0.00467068	4151, 9370, 116844, 1051, 1050, 7350, 153, 154, 56246, 2167, 10891, 5743, 3655, 6517, 51316	3590	32	16396	2.14084	1	0.0547935	0.0507271
GOTERM_BP_DIRECT	GO:0008360~regulation of cell shape	45	1.20546	0.00471162	5064, 5364, 7422, 6354, 6357, 7940, 6356, 3383, 1613, 6708, 1436, 3815, 310, 2147, 1453, 54751, 6348, 6347, 6369, 10630, 3679, 4627, 6285, 7430, 3791, 3055, 2185, 79784, 10602, 3569, 10428, 2534, 3249, 2039, 10507, 2335, 301, 30011, 4478, 1729, 5921, 8317, 3689, 7429, 5747	3590	139	16396	1.47857	1	0.0551961	0.0510999
GOTERM_CC_DIRECT	GO:0030027~lamellipodium	48	1.28583	0.00473341	9564, 5880, 4254, 4771, 5420, 4210, 7248, 1000, 59341, 1020, 2195, 6093, 27329, 55740, 199, 57449, 1499, 3611, 57026, 10519, 55704, 999, 6548, 10211, 6624, 10411, 10630, 5879, 10456, 58, 59, 64005, 5872, 10163, 5311, 2185, 5290, 387, 324, 4810, 3688, 1969, 1605, 7429, 1803, 5747, 2319, 8936	3662	159	17735	1.46203	0.995261	0.0539322	0.0494379
GOTERM_BP_DIRECT	GO:0006469~negative regulation of protein kinase activity	34	0.910796	0.00474224	8651, 11261, 4771, 9104, 64798, 84959, 9021, 5062, 1634, 135, 3315, 3611, 57761, 2167, 634, 4763, 5611, 859, 131578, 7070, 2041, 1029, 2811, 3569, 84335, 1101, 207, 7249, 5788, 5502, 5987, 4616, 5925, 1647	3590	98	16396	1.58451	1	0.0554769	0.0513598
GOTERM_MF_DIRECT	GO:0003707~steroid hormone receptor activity	22	0.589338	0.00478935	8013, 8431, 6097, 5241, 9970, 7067, 6256, 7421, 5465, 2100, 2099, 3164, 3172, 5916, 367, 5467, 2908, 5468, 8856, 4306, 2516, 5914	3557	56	16472	1.81927	0.999994	0.0865206	0.0824948
GOTERM_BP_DIRECT	GO:0042789~mRNA transcription from RNA polymerase II promoter	10	0.267881	0.00491587	5460, 3091, 64321, 6720, 468, 6774, 4005, 5469, 1649, 728	3590	17	16396	2.68655	1	0.0558192	0.0516768
GOTERM_BP_DIRECT	GO:1901216~positive regulation of neuron death	10	0.267881	0.00491587	54541, 2932, 25, 8301, 2002, 2475, 348, 4217, 1191, 142	3590	17	16396	2.68655	1	0.0558192	0.0516768
GOTERM_BP_DIRECT	GO:0031589~cell-substrate adhesion	10	0.267881	0.00491587	7450, 3690, 2621, 64005, 3685, 5467, 3655, 3688, 3678, 284	3590	17	16396	2.68655	1	0.0558192	0.0516768
GOTERM_BP_DIRECT	GO:0032331~negative regulation of chondrocyte differentiation	10	0.267881	0.00491587	8200, 5916, 7046, 652, 1499, 6662, 26585, 5744, 6591, 2736	3590	17	16396	2.68655	1	0.0558192	0.0516768
GOTERM_BP_DIRECT	GO:0000028~ribosomal small subunit assembly	10	0.267881	0.00491587	6232, 26284, 6234, 6223, 6204, 6218, 6193, 6209, 6208, 3921	3590	17	16396	2.68655	1	0.0558192	0.0516768
GOTERM_BP_DIRECT	GO:0060749~mammary gland alveolus development	10	0.267881	0.00491587	374, 595, 1950, 7422, 367, 7039, 11331, 3398, 2066, 2099	3590	17	16396	2.68655	1	0.0558192	0.0516768
GOTERM_BP_DIRECT	GO:1901741~positive regulation of myoblast fusion	10	0.267881	0.00491587	8740, 4283, 2323, 1432, 3566, 963, 10938, 3565, 9518, 10211	3590	17	16396	2.68655	1	0.0558192	0.0516768
GOTERM_BP_DIRECT	GO:1902041~regulation of extrinsic apoptotic signaling pathway via death domain receptors	10	0.267881	0.00491587	147138, 3958, 355, 356, 8567, 8743, 841, 8797, 8737, 8837	3590	17	16396	2.68655	1	0.0558192	0.0516768
GOTERM_BP_DIRECT	GO:0050434~positive regulation of viral transcription	14	0.375033	0.00492642	5441, 5430, 5431, 25920, 29969, 2963, 2962, 1025, 51773, 51497, 4851, 5216, 7936, 2959	3590	29	16396	2.20482	1	0.0558192	0.0516768
GOTERM_BP_DIRECT	GO:0043030~regulation of macrophage activation	7	0.187517	0.00495888	4282, 8399, 972, 6542, 23729, 6622, 727897	3590	9	16396	3.55221	1	0.0558192	0.0516768
GOTERM_BP_DIRECT	GO:0002237~response to molecule of bacterial origin	7	0.187517	0.00495888	2920, 3576, 3586, 7128, 54106, 7097, 8915	3590	9	16396	3.55221	1	0.0558192	0.0516768
GOTERM_BP_DIRECT	GO:0031638~zymogen activation	7	0.187517	0.00495888	728441, 2678, 1512, 3818, 2158, 4323, 2161	3590	9	16396	3.55221	1	0.0558192	0.0516768
GOTERM_BP_DIRECT	GO:0060670~branching involved in labyrinthine layer morphogenesis	7	0.187517	0.00495888	6692, 133, 3586, 84870, 7855, 2263, 9021	3590	9	16396	3.55221	1	0.0558192	0.0516768
GOTERM_BP_DIRECT	GO:0071404~cellular response to low-density lipoprotein particle stimulus	7	0.187517	0.00495888	6850, 975, 4864, 3688, 3689, 948, 928	3590	9	16396	3.55221	1	0.0558192	0.0516768
GOTERM_BP_DIRECT	GO:0032930~positive regulation of superoxide anion generation	7	0.187517	0.00495888	5580, 1401, 6647, 7040, 183, 2150, 1956	3590	9	16396	3.55221	1	0.0558192	0.0516768
GOTERM_BP_DIRECT	GO:0007184~SMAD protein import into nucleus	7	0.187517	0.00495888	8200, 5371, 10140, 7040, 7042, 9372, 3725	3590	9	16396	3.55221	1	0.0558192	0.0516768
GOTERM_BP_DIRECT	GO:0060068~vagina development	7	0.187517	0.00495888	7474, 7301, 578, 558, 2099, 10461, 581	3590	9	16396	3.55221	1	0.0558192	0.0516768
GOTERM_BP_DIRECT	GO:0009651~response to salt stress	7	0.187517	0.00495888	8564, 310, 7124, 624, 2056, 3320, 581	3590	9	16396	3.55221	1	0.0558192	0.0516768
GOTERM_BP_DIRECT	GO:0002281~macrophage activation involved in immune response	7	0.187517	0.00495888	5581, 84868, 6850, 3929, 3146, 7535, 148022	3590	9	16396	3.55221	1	0.0558192	0.0516768
GOTERM_BP_DIRECT	GO:0008635~activation of cysteine-type endopeptidase activity involved in apoptotic process by cytochrome c	7	0.187517	0.00495888	578, 842, 317, 836, 54205, 581, 56616	3590	9	16396	3.55221	1	0.0558192	0.0516768
GOTERM_BP_DIRECT	GO:0031639~plasminogen activation	7	0.187517	0.00495888	3818, 2244, 2266, 2243, 5327, 2160, 350	3590	9	16396	3.55221	1	0.0558192	0.0516768
GOTERM_BP_DIRECT	GO:0070933~histone H4 deacetylation	7	0.187517	0.00495888	22933, 9734, 9759, 56916, 3066, 3065, 51547	3590	9	16396	3.55221	1	0.0558192	0.0516768
GOTERM_BP_DIRECT	GO:0045124~regulation of bone resorption	7	0.187517	0.00495888	1436, 3690, 5166, 632, 4763, 6714, 1901	3590	9	16396	3.55221	1	0.0558192	0.0516768
GOTERM_BP_DIRECT	GO:0046641~positive regulation of alpha-beta T cell proliferation	7	0.187517	0.00495888	6850, 729230, 940, 941, 7535, 8767, 916	3590	9	16396	3.55221	1	0.0558192	0.0516768
GOTERM_BP_DIRECT	GO:0002544~chronic inflammatory response	7	0.187517	0.00495888	7057, 9536, 820, 6356, 7412, 6279, 10563	3590	9	16396	3.55221	1	0.0558192	0.0516768
GOTERM_BP_DIRECT	GO:0090197~positive regulation of chemokine secretion	7	0.187517	0.00495888	1436, 3566, 90865, 29108, 27159, 727, 9173	3590	9	16396	3.55221	1	0.0558192	0.0516768
GOTERM_BP_DIRECT	GO:0060020~Bergmann glial cell differentiation	7	0.187517	0.00495888	7431, 5781, 25, 5594, 5595, 2670, 5604	3590	9	16396	3.55221	1	0.0558192	0.0516768
GOTERM_BP_DIRECT	GO:0007167~enzyme linked receptor protein signaling pathway	7	0.187517	0.00495888	3717, 3718, 6850, 2621, 920, 2064, 51206	3590	9	16396	3.55221	1	0.0558192	0.0516768
GOTERM_BP_DIRECT	GO:0040014~regulation of multicellular organism growth	13	0.348245	0.00512277	8200, 5781, 6774, 2263, 2690, 5290, 351, 3479, 8879, 6776, 6647, 80351, 5617	3590	26	16396	2.28357	1	0.0575863	0.0533127
GOTERM_CC_DIRECT	GO:0042629~mast cell granule	11	0.294669	0.00514878	231, 8013, 3815, 695, 3579, 301, 4067, 1113, 27040, 4878, 5293	3662	21	17735	2.5368	0.997041	0.0580782	0.0532384
GOTERM_BP_DIRECT	GO:2000463~positive regulation of excitatory postsynaptic potential	11	0.294669	0.00517687	5728, 9378, 54413, 57555, 9699, 22871, 2185, 5649, 2902, 6804, 5590	3590	20	16396	2.51192	1	0.0579601	0.0536588
GOTERM_BP_DIRECT	GO:0050850~positive regulation of calcium-mediated signaling	11	0.294669	0.00517687	6351, 100, 2205, 6850, 920, 6348, 7535, 925, 916, 54209, 3094	3590	20	16396	2.51192	1	0.0579601	0.0536588
GOTERM_BP_DIRECT	GO:0017015~regulation of transforming growth factor beta receptor signaling pathway	11	0.294669	0.00517687	112744, 4087, 51592, 4088, 4089, 27122, 163126, 2022, 7040, 859, 4092	3590	20	16396	2.51192	1	0.0579601	0.0536588
GOTERM_MF_DIRECT	GO:0004879~RNA polymerase II transcription factor activity, ligand-activated sequence-specific DNA binding	16	0.42861	0.0052482	8013, 6097, 9970, 6256, 5465, 6774, 2100, 2099, 3164, 196, 3172, 367, 5467, 5468, 8856, 2516	3557	36	16472	2.05816	0.999998	0.0941277	0.0897479
GOTERM_CC_DIRECT	GO:0042599~lamellar body	6	0.160729	0.00539364	6609, 6441, 653509, 6440, 729238, 6439	3662	7	17735	4.15113	0.997758	0.0602378	0.055218
GOTERM_BP_DIRECT	GO:0036092~phosphatidylinositol-3-phosphate biosynthetic process	20	0.535762	0.00547209	5295, 5286, 9365, 5781, 9896, 5289, 2254, 2252, 2263, 5290, 2260, 200576, 5293, 472, 2249, 2247, 2246, 2255, 54106, 3667	3590	49	16396	1.86414	1	0.0611832	0.0566427
GOTERM_MF_DIRECT	GO:0043565~sequence-specific DNA binding	136	3.64318	0.00548363	8013, 6872, 30818, 2034, 3087, 7161, 6591, 2305, 10538, 596, 4609, 1059, 2300, 79811, 10891, 9219, 8805, 3091, 64321, 22926, 3131, 3097, 145258, 367, 4851, 79923, 406, 1869, 1747, 2290, 6097, 6495, 7067, 6256, 3662, 2296, 3142, 9361, 6928, 1998, 2960, 9759, 7975, 116071, 3659, 1999, 8320, 5452, 4088, 4089, 2100, 121643, 668, 6657, 6932, 83881, 6899, 1649, 2736, 3280, 5460, 4097, 5465, 2078, 2353,…	3557	513	16472	1.22768	0.999999	0.0976477	0.0931041
GOTERM_BP_DIRECT	GO:0001756~somitogenesis	17	0.455398	0.00552966	5591, 5362, 7474, 4088, 8557, 23509, 5663, 6862, 28514, 2033, 2296, 472, 57534, 51176, 56983, 4920, 10683	3590	39	16396	1.9908	1	0.0617442	0.057162
GOTERM_BP_DIRECT	GO:0098869~cellular oxidant detoxification	26	0.696491	0.00563395	50506, 373156, 3043, 3240, 25824, 213, 3039, 2168, 27244, 8288, 7296, 4025, 114757, 6280, 7295, 7173, 2878, 2954, 2876, 2952, 348, 5742, 5743, 847, 2936, 55937	3590	70	16396	1.69636	1	0.0628246	0.0581623
GOTERM_BP_DIRECT	GO:0021987~cerebral cortex development	22	0.589338	0.00567083	3091, 50937, 5079, 4035, 7248, 1000, 259266, 1281, 23028, 581, 471, 8195, 6608, 4915, 597, 83696, 26047, 3014, 4763, 4852, 4747, 2902	3590	56	16396	1.79423	1	0.0631514	0.0584648
GOTERM_MF_DIRECT	GO:0043531~ADP binding	15	0.401822	0.00571228	2081, 6890, 58, 4199, 9361, 476, 7415, 317, 5315, 5536, 2729, 4436, 2956, 9619, 4627	3557	33	16472	2.10494	0.999999	0.100287	0.0956203
GOTERM_MF_DIRECT	GO:0030544~Hsp70 protein binding	15	0.401822	0.00571228	2081, 23636, 6188, 1385, 64127, 5071, 581, 7917, 1027, 3337, 983, 2246, 55869, 6622, 6767	3557	33	16472	2.10494	0.999999	0.100287	0.0956203
GOTERM_MF_DIRECT	GO:0016303~1-phosphatidylinositol-3-kinase activity	18	0.482186	0.00578222	5295, 5286, 9365, 5781, 5289, 2254, 2252, 2263, 5290, 2260, 5293, 472, 2249, 2247, 2246, 2255, 54106, 3667	3557	43	16472	1.9385	0.999999	0.100805	0.0961142
GOTERM_CC_DIRECT	GO:0016363~nuclear matrix	32	0.857219	0.00584712	5580, 9984, 5422, 1063, 3141, 1161, 9360, 84844, 10238, 3717, 56916, 4841, 10178, 5119, 3856, 5371, 8520, 22944, 7157, 4221, 4287, 1791, 1051, 6041, 240, 5590, 1822, 1788, 11331, 6678, 6732, 7528	3662	97	17735	1.59768	0.99866	0.0646622	0.0592737
GOTERM_MF_DIRECT	GO:0016493~C-C chemokine receptor activity	8	0.214305	0.00611218	1238, 1236, 1235, 729230, 1234, 10803, 1233, 1230	3557	12	16472	3.08725	1	0.105087	0.100198
GOTERM_MF_DIRECT	GO:0051787~misfolded protein binding	8	0.214305	0.00611218	7917, 9695, 1861, 5611, 10013, 2161, 3309, 1191	3557	12	16472	3.08725	1	0.105087	0.100198
GOTERM_BP_DIRECT	GO:0030334~regulation of cell migration	27	0.723279	0.00615606	5362, 5364, 6750, 23586, 1020, 7040, 284217, 634, 6446, 91624, 5879, 3911, 3714, 3690, 5175, 4000, 7852, 2066, 7070, 182, 5270, 387, 3908, 207, 208, 55558, 4319	3590	74	16396	1.66639	1	0.0684636	0.0633828
GOTERM_BP_DIRECT	GO:0051291~protein heterooligomerization	25	0.669703	0.00632518	5562, 7248, 5564, 391104, 3043, 330, 3416, 673, 3611, 3039, 27243, 7139, 5536, 64087, 4144, 9076, 5590, 841, 51652, 1365, 8737, 11035, 8878, 3987, 8915	3590	67	16396	1.70415	1	0.0702508	0.0650374
GOTERM_MF_DIRECT	GO:0050681~androgen receptor binding	17	0.455398	0.00641417	6597, 8554, 1022, 2033, 24148, 23028, 9063, 23426, 672, 10524, 1655, 1499, 811, 10891, 5579, 5901, 5925	3557	40	16472	1.96812	1	0.109299	0.104213
GOTERM_BP_DIRECT	GO:0002027~regulation of heart rate	15	0.401822	0.00650191	808, 5020, 6331, 2034, 183, 4193, 3270, 796, 5566, 6336, 801, 4624, 859, 4625, 1813	3590	33	16396	2.07597	1	0.0721176	0.0667656
GOTERM_MF_DIRECT	GO:0005021~vascular endothelial growth factor-activated receptor activity	6	0.160729	0.0066202	3791, 5156, 2322, 2321, 8828, 8829	3557	7	16472	3.96932	1	0.109299	0.104213
GOTERM_MF_DIRECT	GO:0016494~C-X-C chemokine receptor activity	6	0.160729	0.0066202	2833, 57007, 3579, 643, 7852, 10663	3557	7	16472	3.96932	1	0.109299	0.104213
GOTERM_MF_DIRECT	GO:0005138~interleukin-6 receptor binding	6	0.160729	0.0066202	3569, 29108, 51752, 3572, 3570, 6868	3557	7	16472	3.96932	1	0.109299	0.104213
GOTERM_MF_DIRECT	GO:0008329~signaling pattern recognition receptor activity	6	0.160729	0.0066202	64581, 1755, 8685, 85363, 7097, 2219	3557	7	16472	3.96932	1	0.109299	0.104213
GOTERM_MF_DIRECT	GO:0009931~calcium-dependent protein serine/threonine kinase activity	6	0.160729	0.0066202	1641, 2872, 8569, 7867, 814, 9261	3557	7	16472	3.96932	1	0.109299	0.104213
GOTERM_BP_DIRECT	GO:0007252~I-kappaB phosphorylation	8	0.214305	0.00662875	9641, 7099, 7098, 51284, 1147, 3551, 54106, 7097	3590	12	16396	3.04475	1	0.0725596	0.0671748
GOTERM_BP_DIRECT	GO:0030212~hyaluronan metabolic process	8	0.214305	0.00662875	3082, 3600, 4288, 207, 3699, 3373, 3700, 5292	3590	12	16396	3.04475	1	0.0725596	0.0671748
GOTERM_BP_DIRECT	GO:1990440~positive regulation of transcription from RNA polymerase II promoter in response to endoplasmic reticulum stress	8	0.214305	0.00662875	7494, 467, 7157, 22926, 468, 1051, 1649, 3309	3590	12	16396	3.04475	1	0.0725596	0.0671748
GOTERM_BP_DIRECT	GO:0045086~positive regulation of interleukin-2 biosynthetic process	8	0.214305	0.00662875	940, 941, 3553, 920, 942, 3662, 3552, 916	3590	12	16396	3.04475	1	0.0725596	0.0671748
GOTERM_BP_DIRECT	GO:0042088~T-helper 1 type immune response	8	0.214305	0.00662875	7099, 7189, 3126, 3123, 602, 10068, 10333, 3606	3590	12	16396	3.04475	1	0.0725596	0.0671748
GOTERM_BP_DIRECT	GO:0070989~oxidative demethylation	8	0.214305	0.00662875	1558, 1544, 1576, 1565, 80312, 8846, 54790, 1559	3590	12	16396	3.04475	1	0.0725596	0.0671748
GOTERM_BP_DIRECT	GO:0045779~negative regulation of bone resorption	8	0.214305	0.00662875	3569, 796, 952, 5027, 7128, 84959, 3635, 9607	3590	12	16396	3.04475	1	0.0725596	0.0671748
GOTERM_BP_DIRECT	GO:2000648~positive regulation of stem cell proliferation	8	0.214305	0.00662875	7015, 8091, 5788, 151871, 51548, 23028, 9739, 4072	3590	12	16396	3.04475	1	0.0725596	0.0671748
GOTERM_BP_DIRECT	GO:0021954~central nervous system neuron development	8	0.214305	0.00662875	2624, 4915, 4133, 4852, 538, 1020, 3952, 3251	3590	12	16396	3.04475	1	0.0725596	0.0671748
GOTERM_BP_DIRECT	GO:0009268~response to pH	8	0.214305	0.00662875	760, 7274, 410, 5066, 411, 3764, 6833, 2629	3590	12	16396	3.04475	1	0.0725596	0.0671748
GOTERM_MF_DIRECT	GO:0003723~RNA binding	141	3.77712	0.00670155	6230, 8894, 4691, 6234, 9984, 6632, 10492, 6191, 6193, 6192, 5937, 10656, 168400, 51087, 10658, 51366, 10891, 11102, 6625, 1618, 5536, 51008, 9739, 10930, 5936, 5393, 6122, 8661, 6124, 24148, 80745, 54882, 51095, 26284, 1984, 60489, 57510, 219927, 4736, 6132, 6135, 6651, 6137, 342371, 7184, 10914, 85437, 1993, 55621, 10594, 6129, 4869, 6141, 6144, 6143, 10482, 6301, 23435, 22984, 11338, 10922, 51…	3557	537	16472	1.21593	1	0.109914	0.1048
GOTERM_BP_DIRECT	GO:0006260~DNA replication	48	1.28583	0.00670805	4172, 4173, 5763, 5422, 5884, 3364, 472, 55388, 990, 5937, 672, 10714, 1017, 56953, 4928, 3479, 1950, 27343, 55704, 5930, 11201, 5810, 5976, 84464, 10432, 51426, 6241, 6240, 22944, 5111, 4683, 4782, 23411, 7150, 10524, 2237, 983, 23054, 545, 6117, 4774, 5424, 54107, 4678, 11277, 8317, 8914, 43	3590	153	16396	1.43283	1	0.0733314	0.0678894
GOTERM_MF_DIRECT	GO:0005044~scavenger receptor activity	19	0.508974	0.00675585	8685, 58191, 9332, 7113, 5167, 5651, 5169, 8909, 10216, 57007, 1238, 1755, 3426, 3959, 3249, 921, 84000, 923, 56649	3557	47	16472	1.87205	1	0.110081	0.104958
GOTERM_BP_DIRECT	GO:0010803~regulation of tumor necrosis factor-mediated signaling pathway	14	0.375033	0.00697627	7132, 6850, 8567, 7311, 7124, 29108, 3551, 330, 1147, 841, 7316, 8737, 8517, 7128	3590	30	16396	2.13133	1	0.0747455	0.0691985
GOTERM_BP_DIRECT	GO:0045739~positive regulation of DNA repair	14	0.375033	0.00697627	9025, 6188, 5111, 9577, 4255, 23411, 1161, 672, 57332, 3014, 2255, 328, 10155, 1956	3590	30	16396	2.13133	1	0.0747455	0.0691985
GOTERM_BP_DIRECT	GO:0060325~face morphogenesis	14	0.375033	0.00697627	7122, 5781, 6497, 64651, 7040, 9241, 7042, 5083, 29123, 51176, 8879, 4313, 6237, 6899	3590	30	16396	2.13133	1	0.0747455	0.0691985
GOTERM_BP_DIRECT	GO:0071277~cellular response to calcium ion	20	0.535762	0.00704674	6331, 7474, 7226, 2353, 29957, 241, 3726, 3727, 673, 2039, 246, 444, 2521, 2354, 79800, 1906, 10156, 4208, 10105, 3725	3590	50	16396	1.82685	1	0.0747455	0.0691985
GOTERM_BP_DIRECT	GO:0010506~regulation of autophagy	20	0.535762	0.00704674	7494, 9100, 219931, 25, 8975, 27, 2033, 29108, 5071, 472, 1613, 27074, 171389, 3315, 120892, 3146, 834, 4137, 10013, 8408	3590	50	16396	1.82685	1	0.0747455	0.0691985
GOTERM_BP_DIRECT	GO:0060290~transdifferentiation	6	0.160729	0.00705248	4088, 50674, 3642, 947, 4208, 2626	3590	7	16396	3.91468	1	0.0747455	0.0691985
GOTERM_BP_DIRECT	GO:0045869~negative regulation of single stranded viral RNA replication via double stranded DNA intermediate	6	0.160729	0.00705248	60489, 140564, 164668, 8091, 10155, 200316	3590	7	16396	3.91468	1	0.0747455	0.0691985
GOTERM_BP_DIRECT	GO:0048806~genitalia development	6	0.160729	0.00705248	6928, 7474, 5781, 5310, 55636, 131118	3590	7	16396	3.91468	1	0.0747455	0.0691985
GOTERM_BP_DIRECT	GO:0032308~positive regulation of prostaglandin secretion	6	0.160729	0.00705248	5608, 5020, 8399, 3553, 5027, 1906	3590	7	16396	3.91468	1	0.0747455	0.0691985
GOTERM_BP_DIRECT	GO:0043496~regulation of protein homodimerization activity	6	0.160729	0.00705248	596, 578, 64853, 581, 3084, 148022	3590	7	16396	3.91468	1	0.0747455	0.0691985
GOTERM_BP_DIRECT	GO:0072678~T cell migration	6	0.160729	0.00705248	6364, 1235, 64005, 7535, 2838, 1901	3590	7	16396	3.91468	1	0.0747455	0.0691985
GOTERM_BP_DIRECT	GO:0070383~DNA cytosine deamination	6	0.160729	0.00705248	60489, 140564, 164668, 200315, 339, 200316	3590	7	16396	3.91468	1	0.0747455	0.0691985
GOTERM_BP_DIRECT	GO:2000427~positive regulation of apoptotic cell clearance	6	0.160729	0.00705248	4240, 720, 721, 6347, 717, 718	3590	7	16396	3.91468	1	0.0747455	0.0691985
GOTERM_BP_DIRECT	GO:2000049~positive regulation of cell-cell adhesion mediated by cadherin	6	0.160729	0.00705248	3170, 89780, 7474, 3169, 5345, 10211	3590	7	16396	3.91468	1	0.0747455	0.0691985
GOTERM_BP_DIRECT	GO:0019885~antigen processing and presentation of endogenous peptide antigen via MHC class I	6	0.160729	0.00705248	6890, 6892, 3105, 64167, 567, 51752	3590	7	16396	3.91468	1	0.0747455	0.0691985
GOTERM_BP_DIRECT	GO:0071312~cellular response to alkaloid	6	0.160729	0.00705248	7442, 1644, 6770, 598, 3383, 4193	3590	7	16396	3.91468	1	0.0747455	0.0691985
GOTERM_BP_DIRECT	GO:0060687~regulation of branching involved in prostate gland morphogenesis	6	0.160729	0.00705248	3239, 652, 6256, 655, 2099, 2263	3590	7	16396	3.91468	1	0.0747455	0.0691985
GOTERM_BP_DIRECT	GO:0048007~antigen processing and presentation, exogenous lipid antigen via MHC class Ib	6	0.160729	0.00705248	909, 8546, 910, 911, 912, 913	3590	7	16396	3.91468	1	0.0747455	0.0691985
GOTERM_BP_DIRECT	GO:0044321~response to leptin	6	0.160729	0.00705248	595, 6770, 6774, 1906, 23411, 3953	3590	7	16396	3.91468	1	0.0747455	0.0691985
GOTERM_BP_DIRECT	GO:0085029~extracellular matrix assembly	6	0.160729	0.00705248	2621, 3038, 3037, 3036, 60484, 7040	3590	7	16396	3.91468	1	0.0747455	0.0691985
GOTERM_BP_DIRECT	GO:0046598~positive regulation of viral entry into host cell	6	0.160729	0.00705248	5034, 7113, 6737, 81559, 3965, 3956	3590	7	16396	3.91468	1	0.0747455	0.0691985
GOTERM_BP_DIRECT	GO:2000510~positive regulation of dendritic cell chemotaxis	6	0.160729	0.00705248	1236, 1235, 2621, 811, 3592, 3965	3590	7	16396	3.91468	1	0.0747455	0.0691985
GOTERM_BP_DIRECT	GO:2000503~positive regulation of natural killer cell chemotaxis	6	0.160729	0.00705248	6351, 6375, 6352, 6354, 9547, 6348	3590	7	16396	3.91468	1	0.0747455	0.0691985
GOTERM_BP_DIRECT	GO:0001867~complement activation, lectin pathway	6	0.160729	0.00705248	3848, 10747, 4153, 2220, 5648, 2219	3590	7	16396	3.91468	1	0.0747455	0.0691985
GOTERM_CC_DIRECT	GO:0036464~cytoplasmic ribonucleoprotein granule	12	0.321457	0.00709196	4691, 9475, 9118, 998, 1660, 4137, 26986, 60, 6191, 5879, 6194, 6606	3662	25	17735	2.32463	0.999674	0.0776673	0.071195
GOTERM_MF_DIRECT	GO:0004871~signal transducer activity	60	1.60729	0.00720101	5581, 2078, 3162, 9261, 27120, 551, 355, 1499, 3554, 57708, 8767, 5536, 958, 57506, 3956, 124583, 6280, 3925, 684, 3601, 84676, 1387, 136991, 54602, 10342, 4975, 5747, 3965, 4659, 7187, 9564, 9365, 6773, 6772, 6775, 6774, 2770, 148022, 79594, 57449, 3579, 3611, 9318, 1119, 5133, 5331, 2782, 2185, 660, 2778, 10769, 389, 2774, 3587, 8517, 867, 6776, 6778, 3667, 8518	3557	203	16472	1.36873	1	0.116108	0.110705
GOTERM_MF_DIRECT	GO:0005520~insulin-like growth factor binding	10	0.267881	0.00721889	11082, 51232, 3486, 3484, 1490, 4856, 3491, 3480, 3490, 8838	3557	18	16472	2.5727	1	0.116108	0.110705
GOTERM_CC_DIRECT	GO:0016023~cytoplasmic, membrane-bounded vesicle	42	1.1251	0.00722883	8651, 5064, 8650, 5321, 8678, 8313, 8692, 23205, 23426, 472, 55245, 356, 55704, 5159, 7018, 119, 5879, 4803, 10456, 3736, 10280, 3791, 7851, 5551, 7037, 7852, 2263, 2260, 283, 9097, 169026, 79585, 2039, 51652, 3267, 150684, 10682, 79109, 140767, 627, 728, 4758	3662	138	17735	1.47395	0.999721	0.078405	0.0718712
GOTERM_CC_DIRECT	GO:0000228~nuclear chromosome	20	0.535762	0.00749171	5393, 7153, 8352, 10592, 6598, 8091, 3021, 8361, 7150, 8350, 8362, 8351, 8360, 23514, 332, 5885, 55869, 5888, 2956, 3725	3662	53	17735	1.82754	0.999793	0.0798163	0.0731649
GOTERM_BP_DIRECT	GO:0030502~negative regulation of bone mineralization	9	0.241093	0.00755385	3091, 2623, 6662, 26585, 6348, 1230, 6779, 2185, 197	3590	15	16396	2.74028	1	0.0792536	0.0733721
GOTERM_BP_DIRECT	GO:1903543~positive regulation of exosomal secretion	9	0.241093	0.00755385	9146, 6386, 3458, 27243, 8027, 7879, 10015, 7251, 6382	3590	15	16396	2.74028	1	0.0792536	0.0733721
GOTERM_BP_DIRECT	GO:0022408~negative regulation of cell-cell adhesion	9	0.241093	0.00755385	3717, 394263, 25, 4771, 51176, 5420, 999, 7040, 5747	3590	15	16396	2.74028	1	0.0792536	0.0733721
GOTERM_BP_DIRECT	GO:0046688~response to copper ion	9	0.241093	0.00755385	4519, 5066, 983, 6652, 3552, 5621, 4512, 6647, 3383	3590	15	16396	2.74028	1	0.0792536	0.0733721
GOTERM_BP_DIRECT	GO:0002042~cell migration involved in sprouting angiogenesis	9	0.241093	0.00755385	2247, 7422, 3791, 1960, 26585, 3688, 1948, 3164, 8829	3590	15	16396	2.74028	1	0.0792536	0.0733721
GOTERM_BP_DIRECT	GO:0051974~negative regulation of telomerase activity	9	0.241093	0.00755385	5371, 7157, 10715, 4221, 80169, 100134934, 5468, 80119, 6714	3590	15	16396	2.74028	1	0.0792536	0.0733721
GOTERM_BP_DIRECT	GO:0045190~isotype switching	9	0.241093	0.00755385	9025, 10538, 4683, 57379, 2067, 4436, 959, 4292, 2956	3590	15	16396	2.74028	1	0.0792536	0.0733721
GOTERM_BP_DIRECT	GO:0014898~cardiac muscle hypertrophy in response to stress	9	0.241093	0.00755385	488, 8557, 2146, 9759, 4624, 4625, 4878, 4208, 2627	3590	15	16396	2.74028	1	0.0792536	0.0733721
GOTERM_CC_DIRECT	GO:0042105~alpha-beta T cell receptor complex	5	0.133941	0.00757122	919, 5777, 915, 916, 917	3662	5	17735	4.84298	0.999811	0.0798163	0.0731649
GOTERM_CC_DIRECT	GO:0033093~Weibel-Palade body	5	0.133941	0.00757122	7450, 5873, 201294, 1906, 1889	3662	5	17735	4.84298	0.999811	0.0798163	0.0731649
GOTERM_BP_DIRECT	GO:0048870~cell motility	12	0.321457	0.00775986	7046, 6497, 4323, 2022, 6624, 1969, 947, 5747, 5604, 6868, 10630, 5879	3590	24	16396	2.28357	1	0.081109	0.0750898
GOTERM_BP_DIRECT	GO:0007422~peripheral nervous system development	12	0.321457	0.00775986	1910, 9048, 1960, 7368, 4763, 50674, 30812, 6526, 2064, 5008, 23114, 3084	3590	24	16396	2.28357	1	0.081109	0.0750898
GOTERM_BP_DIRECT	GO:0030099~myeloid cell differentiation	12	0.321457	0.00775986	7066, 5371, 1028, 114609, 861, 23054, 8544, 604, 3394, 54790, 7704, 1050	3590	24	16396	2.28357	1	0.081109	0.0750898
GOTERM_CC_DIRECT	GO:0031965~nuclear membrane	62	1.66086	0.00781171	6196, 129401, 5663, 9589, 286205, 3164, 22994, 1019, 3837, 596, 4928, 598, 7514, 10456, 5593, 9118, 2000, 1471, 240, 241, 3601, 3249, 1861, 2597, 8658, 5987, 5903, 7341, 25, 9123, 8315, 27348, 29844, 27346, 29843, 23345, 1910, 894, 57761, 55787, 55308, 11322, 55746, 3930, 1956, 23636, 5371, 9378, 4000, 160851, 5058, 5653, 5730, 116535, 147138, 171389, 51155, 79902, 4599, 4710, 706, 10204	3662	221	17735	1.35866	0.999856	0.0815889	0.0747898
GOTERM_MF_DIRECT	GO:0051219~phosphoprotein binding	15	0.401822	0.00781224	6295, 7442, 4067, 8535, 5311, 3482, 29110, 2475, 8725, 1807, 6622, 5327, 407, 6714, 5925	3557	34	16472	2.04303	1	0.124846	0.119037
GOTERM_BP_DIRECT	GO:0051603~proteolysis involved in cellular protein catabolic process	19	0.508974	0.00784434	8722, 5476, 5641, 59342, 3001, 1075, 9361, 1514, 1513, 3416, 1512, 1522, 841, 1520, 5698, 5611, 5688, 1508, 3309	3590	47	16396	1.84629	1	0.0817371	0.0756713
GOTERM_BP_DIRECT	GO:0045600~positive regulation of fat cell differentiation	19	0.508974	0.00784434	7494, 4041, 25819, 6783, 3398, 1385, 1051, 1050, 6591, 27120, 650, 688, 2487, 5467, 207, 5468, 6789, 7704, 10974	3590	47	16396	1.84629	1	0.0817371	0.0756713
GOTERM_BP_DIRECT	GO:0010039~response to iron ion	10	0.267881	0.00794114	595, 596, 6531, 712, 57817, 3077, 2395, 1371, 1813, 4193	3590	18	16396	2.53729	1	0.0817371	0.0756713
GOTERM_BP_DIRECT	GO:0036120~cellular response to platelet-derived growth factor stimulus	10	0.267881	0.00794114	4609, 2534, 3037, 3036, 5159, 1385, 867, 6347, 3373, 6714	3590	18	16396	2.53729	1	0.0817371	0.0756713
GOTERM_BP_DIRECT	GO:0035066~positive regulation of histone acetylation	10	0.267881	0.00794114	672, 5595, 6871, 3553, 10891, 4842, 7040, 408, 50943, 6591	3590	18	16396	2.53729	1	0.0817371	0.0756713
GOTERM_BP_DIRECT	GO:0006970~response to osmotic stress	10	0.267881	0.00794114	1831, 5609, 366, 6652, 1386, 6513, 339, 2185, 5603, 1956	3590	18	16396	2.53729	1	0.0817371	0.0756713
GOTERM_BP_DIRECT	GO:2000249~regulation of actin cytoskeleton reorganization	10	0.267881	0.00794114	50848, 1613, 1436, 25, 5156, 27, 7226, 2185, 7040, 10411	3590	18	16396	2.53729	1	0.0817371	0.0756713
GOTERM_BP_DIRECT	GO:0048169~regulation of long-term neuronal synaptic plasticity	10	0.267881	0.00794114	8831, 4763, 6622, 6855, 2915, 183, 4218, 1813, 3845, 2902	3590	18	16396	2.53729	1	0.0817371	0.0756713
GOTERM_BP_DIRECT	GO:0006103~2-oxoglutarate metabolic process	10	0.267881	0.00794114	3417, 6898, 6776, 137872, 2806, 2690, 84706, 2805, 1738, 3418	3590	18	16396	2.53729	1	0.0817371	0.0756713
GOTERM_BP_DIRECT	GO:0007492~endoderm development	11	0.294669	0.00796694	9573, 4088, 4089, 4851, 7080, 83881, 3087, 7040, 23237, 5083, 2626	3590	21	16396	2.39231	1	0.0817371	0.0756713
GOTERM_BP_DIRECT	GO:0007369~gastrulation	11	0.294669	0.00796694	145258, 187, 8013, 25949, 8452, 4087, 55997, 83881, 7290, 1738, 6194	3590	21	16396	2.39231	1	0.0817371	0.0756713
GOTERM_BP_DIRECT	GO:0045663~positive regulation of myoblast differentiation	11	0.294669	0.00796694	8740, 4283, 50937, 3611, 2323, 1432, 8048, 91653, 3486, 4217, 4208	3590	21	16396	2.39231	1	0.0817371	0.0756713
GOTERM_BP_DIRECT	GO:0071480~cellular response to gamma radiation	11	0.294669	0.00796694	50507, 598, 7520, 545, 2002, 3014, 5888, 1958, 23028, 10413, 472	3590	21	16396	2.39231	1	0.0817371	0.0756713
GOTERM_BP_DIRECT	GO:0051403~stress-activated MAPK cascade	11	0.294669	0.00796694	23291, 1326, 4790, 5609, 1147, 7311, 7316, 8517, 3551, 183, 5936	3590	21	16396	2.39231	1	0.0817371	0.0756713
GOTERM_BP_DIRECT	GO:0006699~bile acid biosynthetic process	11	0.294669	0.00796694	10998, 6927, 9023, 6770, 11001, 1581, 8647, 3295, 1109, 570, 10005	3590	21	16396	2.39231	1	0.0817371	0.0756713
GOTERM_MF_DIRECT	GO:0051087~chaperone binding	28	0.750067	0.00801836	3280, 8975, 7248, 332, 3337, 476, 1356, 213, 578, 84447, 2244, 811, 5611, 6647, 6767, 8266, 7450, 51608, 7157, 1075, 5071, 581, 1191, 3329, 1027, 3106, 5621, 3309	3557	80	16472	1.6208	1	0.127323	0.121399
GOTERM_CC_DIRECT	GO:0071944~cell periphery	16	0.42861	0.00811634	5581, 7430, 3880, 4155, 7984, 2526, 387, 1499, 10519, 3872, 11331, 3861, 4478, 5536, 3875, 4811	3662	39	17735	1.98686	0.999898	0.083993	0.0769936
GOTERM_CC_DIRECT	GO:0031092~platelet alpha granule membrane	8	0.214305	0.00837273	5175, 3690, 6403, 6678, 3674, 6622, 948, 928	3662	13	17735	2.9803	0.999924	0.0858586	0.0787037
GOTERM_BP_DIRECT	GO:1901796~regulation of signal transduction by p53 class mediator	40	1.07152	0.00839148	6790, 6872, 5562, 6794, 5563, 8851, 6874, 5564, 5884, 3364, 2033, 3066, 1020, 3065, 7161, 472, 4193, 1459, 672, 1457, 1017, 6908, 1432, 387893, 7316, 8626, 79813, 5810, 9219, 8805, 5371, 4683, 7311, 7157, 10524, 545, 6117, 207, 5600, 6877	3590	124	16396	1.47327	1	0.0859869	0.0796057
GOTERM_MF_DIRECT	GO:0015485~cholesterol binding	17	0.455398	0.0084482	6770, 5375, 22937, 19, 23762, 345, 335, 336, 347, 348, 4864, 857, 6855, 706, 10577, 9619, 5727	3557	41	16472	1.92012	1	0.1333	0.127097
GOTERM_BP_DIRECT	GO:0006338~chromatin remodeling	29	0.776855	0.00858081	6597, 6871, 6598, 2099, 3066, 3065, 5081, 23569, 2625, 6927, 4609, 9759, 8626, 56916, 10014, 8289, 9557, 6662, 10361, 23476, 7150, 7270, 1105, 3169, 51773, 546, 55636, 50943, 5925	3590	83	16396	1.59574	1	0.087819	0.0813018
GOTERM_BP_DIRECT	GO:0051259~protein oligomerization	22	0.589338	0.00895491	7010, 23209, 8996, 4077, 160851, 11261, 6532, 64127, 114548, 581, 4938, 79026, 367, 5027, 7128, 3654, 6548, 10155, 858, 4869, 818, 8915	3590	58	16396	1.73236	1	0.0915354	0.0847424
GOTERM_MF_DIRECT	GO:0042289~MHC class II protein binding	5	0.133941	0.00897423	3902, 972, 920, 3872, 220972	3557	5	16472	4.63087	1	0.133969	0.127735
GOTERM_MF_DIRECT	GO:0019960~C-X3-C chemokine binding	5	0.133941	0.00897423	1524, 3690, 3685, 3676, 3688	3557	5	16472	4.63087	1	0.133969	0.127735
GOTERM_MF_DIRECT	GO:0030883~endogenous lipid antigen binding	5	0.133941	0.00897423	909, 910, 911, 912, 913	3557	5	16472	4.63087	1	0.133969	0.127735
GOTERM_MF_DIRECT	GO:0051525~NFAT protein binding	5	0.133941	0.00897423	1432, 5465, 6688, 50943, 2626	3557	5	16472	4.63087	1	0.133969	0.127735
GOTERM_MF_DIRECT	GO:0030884~exogenous lipid antigen binding	5	0.133941	0.00897423	909, 910, 911, 912, 913	3557	5	16472	4.63087	1	0.133969	0.127735
GOTERM_MF_DIRECT	GO:0004668~protein-arginine deiminase activity	5	0.133941	0.00897423	11240, 29943, 51702, 23569, 353238	3557	5	16472	4.63087	1	0.133969	0.127735
GOTERM_MF_DIRECT	GO:0015057~thrombin receptor activity	5	0.133941	0.00897423	2811, 2149, 9002, 2151, 2150	3557	5	16472	4.63087	1	0.133969	0.127735
GOTERM_MF_DIRECT	GO:0048248~CXCR3 chemokine receptor binding	5	0.133941	0.00897423	6373, 4283, 5196, 10563, 3627	3557	5	16472	4.63087	1	0.133969	0.127735
GOTERM_MF_DIRECT	GO:0034979~NAD-dependent protein deacetylase activity	5	0.133941	0.00897423	22933, 23408, 23409, 23411, 51548	3557	5	16472	4.63087	1	0.133969	0.127735
GOTERM_BP_DIRECT	GO:0001501~skeletal system development	43	1.15189	0.00904101	7046, 7421, 5741, 2296, 9241, 1281, 3481, 7042, 197, 650, 3239, 3479, 632, 655, 2487, 2200, 2662, 9759, 8626, 10631, 3714, 1834, 65057, 9573, 6662, 2260, 9451, 166, 1028, 3623, 3226, 10682, 60484, 55636, 5744, 649, 10683, 1969, 6659, 7704, 4318, 2736, 1009	3590	136	16396	1.44402	1	0.0923024	0.0854525
GOTERM_MF_DIRECT	GO:0035035~histone acetyltransferase binding	13	0.348245	0.00931276	8013, 22933, 3091, 5111, 7157, 1385, 2034, 23741, 1051, 54457, 51341, 1958, 50943	3557	28	16472	2.15005	1	0.134213	0.127968
GOTERM_MF_DIRECT	GO:0019864~IgG binding	7	0.187517	0.00941824	2217, 2215, 2214, 2213, 2212, 5304, 2209	3557	10	16472	3.24161	1	0.134213	0.127968
GOTERM_MF_DIRECT	GO:0004859~phospholipase inhibitor activity	7	0.187517	0.00941824	341, 5132, 301, 302, 306, 308, 27329	3557	10	16472	3.24161	1	0.134213	0.127968
GOTERM_MF_DIRECT	GO:0051428~peptide hormone receptor binding	7	0.187517	0.00941824	3717, 5781, 2534, 5741, 5744, 3952, 4878	3557	10	16472	3.24161	1	0.134213	0.127968
GOTERM_MF_DIRECT	GO:0042805~actinin binding	7	0.187517	0.00941824	4790, 8842, 5970, 8048, 5311, 10611, 7273	3557	10	16472	3.24161	1	0.134213	0.127968
GOTERM_MF_DIRECT	GO:0031702~type 1 angiotensin receptor binding	7	0.187517	0.00941824	7297, 1910, 3717, 624, 2782, 183, 409	3557	10	16472	3.24161	1	0.134213	0.127968
GOTERM_MF_DIRECT	GO:0042975~peroxisome proliferator activated receptor binding	7	0.187517	0.00941824	8431, 10891, 8517, 4776, 5469, 171023, 4193	3557	10	16472	3.24161	1	0.134213	0.127968
GOTERM_MF_DIRECT	GO:0051287~NAD binding	16	0.42861	0.0094213	6652, 4199, 7358, 26227, 4190, 142, 3417, 3939, 1488, 1487, 2597, 316, 1738, 4723, 3945, 3418	3557	38	16472	1.94984	1	0.134213	0.127968
GOTERM_BP_DIRECT	GO:0001714~endodermal cell fate specification	5	0.133941	0.00945841	6928, 5460, 8320, 79923, 6657	3590	5	16396	4.56713	1	0.0938081	0.0868464
GOTERM_BP_DIRECT	GO:0034349~glial cell apoptotic process	5	0.133941	0.00945841	842, 317, 637, 836, 5925	3590	5	16396	4.56713	1	0.0938081	0.0868464
GOTERM_BP_DIRECT	GO:0045542~positive regulation of cholesterol biosynthetic process	5	0.133941	0.00945841	5562, 2246, 6720, 5447, 9619	3590	5	16396	4.56713	1	0.0938081	0.0868464
GOTERM_BP_DIRECT	GO:0002551~mast cell chemotaxis	5	0.133941	0.00945841	3815, 1113, 6356, 5879, 5293	3590	5	16396	4.56713	1	0.0938081	0.0868464
GOTERM_BP_DIRECT	GO:0031622~positive regulation of fever generation	5	0.133941	0.00945841	1268, 7124, 3553, 5743, 5733	3590	5	16396	4.56713	1	0.0938081	0.0868464
GOTERM_BP_DIRECT	GO:0060591~chondroblast differentiation	5	0.133941	0.00945841	8200, 2249, 2247, 3491, 5914	3590	5	16396	4.56713	1	0.0938081	0.0868464
GOTERM_BP_DIRECT	GO:0070842~aggresome assembly	5	0.133941	0.00945841	4591, 10537, 7415, 10013, 5071	3590	5	16396	4.56713	1	0.0938081	0.0868464
GOTERM_BP_DIRECT	GO:0042092~type 2 immune response	5	0.133941	0.00945841	3565, 3586, 90865, 604, 3606	3590	5	16396	4.56713	1	0.0938081	0.0868464
GOTERM_BP_DIRECT	GO:0007262~STAT protein import into nucleus	5	0.133941	0.00945841	3280, 3717, 2149, 3718, 1950	3590	5	16396	4.56713	1	0.0938081	0.0868464
GOTERM_BP_DIRECT	GO:0014012~peripheral nervous system axon regeneration	5	0.133941	0.00945841	335, 347, 706, 3371, 4747	3590	5	16396	4.56713	1	0.0938081	0.0868464
GOTERM_BP_DIRECT	GO:0046813~receptor-mediated virion attachment to host cell	5	0.133941	0.00945841	131578, 2621, 975, 3383, 59272	3590	5	16396	4.56713	1	0.0938081	0.0868464
GOTERM_BP_DIRECT	GO:1900103~positive regulation of endoplasmic reticulum unfolded protein response	5	0.133941	0.00945841	2081, 7494, 5295, 578, 581	3590	5	16396	4.56713	1	0.0938081	0.0868464
GOTERM_BP_DIRECT	GO:0070345~negative regulation of fat cell proliferation	5	0.133941	0.00945841	2624, 8864, 1871, 7027, 1869	3590	5	16396	4.56713	1	0.0938081	0.0868464
GOTERM_BP_DIRECT	GO:0018101~protein citrullination	5	0.133941	0.00945841	11240, 29943, 51702, 23569, 353238	3590	5	16396	4.56713	1	0.0938081	0.0868464
GOTERM_BP_DIRECT	GO:0032747~positive regulation of interleukin-23 production	5	0.133941	0.00945841	1437, 3458, 23765, 4615, 3605	3590	5	16396	4.56713	1	0.0938081	0.0868464
GOTERM_BP_DIRECT	GO:0032714~negative regulation of interleukin-5 production	5	0.133941	0.00945841	8288, 7356, 51176, 50943, 282618	3590	5	16396	4.56713	1	0.0938081	0.0868464
GOTERM_BP_DIRECT	GO:2000343~positive regulation of chemokine (C-X-C motif) ligand 2 production	5	0.133941	0.00945841	4282, 114609, 972, 7124, 3065	3590	5	16396	4.56713	1	0.0938081	0.0868464
GOTERM_BP_DIRECT	GO:0071864~positive regulation of cell proliferation in bone marrow	5	0.133941	0.00945841	3569, 2323, 51176, 5741, 4208	3590	5	16396	4.56713	1	0.0938081	0.0868464
GOTERM_BP_DIRECT	GO:0060744~mammary gland branching involved in thelarche	5	0.133941	0.00945841	374, 7474, 11331, 5469, 7040	3590	5	16396	4.56713	1	0.0938081	0.0868464
GOTERM_BP_DIRECT	GO:1902262~apoptotic process involved in patterning of blood vessels	5	0.133941	0.00945841	4041, 51176, 578, 6688, 581	3590	5	16396	4.56713	1	0.0938081	0.0868464
GOTERM_BP_DIRECT	GO:0002682~regulation of immune system process	5	0.133941	0.00945841	2678, 5004, 5005, 5304, 54414	3590	5	16396	4.56713	1	0.0938081	0.0868464
GOTERM_BP_DIRECT	GO:0022614~membrane to membrane docking	5	0.133941	0.00945841	7430, 7412, 4478, 3383, 6093	3590	5	16396	4.56713	1	0.0938081	0.0868464
GOTERM_BP_DIRECT	GO:0099565~chemical synaptic transmission, postsynaptic	5	0.133941	0.00945841	2932, 2931, 207, 409, 1813	3590	5	16396	4.56713	1	0.0938081	0.0868464
GOTERM_BP_DIRECT	GO:0045077~negative regulation of interferon-gamma biosynthetic process	5	0.133941	0.00945841	3624, 3623, 10859, 50943, 80381	3590	5	16396	4.56713	1	0.0938081	0.0868464
GOTERM_MF_DIRECT	GO:0005506~iron ion binding	46	1.23225	0.00961594	4051, 9023, 4057, 6059, 1583, 1581, 3043, 3042, 1558, 1557, 1555, 3039, 1576, 3818, 53940, 84864, 811, 316, 4842, 120227, 4846, 1559, 3934, 5053, 4241, 7498, 5475, 1594, 23498, 1591, 114757, 240, 3050, 6916, 4519, 1545, 1544, 1588, 1543, 1565, 246, 3048, 1584, 80312, 4512, 1548	3557	150	16472	1.42013	1	0.135438	0.129136
GOTERM_MF_DIRECT	GO:0046983~protein dimerization activity	46	1.23225	0.00961594	6774, 22871, 9242, 196, 25824, 7020, 51082, 472, 2625, 10855, 6927, 4609, 1610, 1874, 1871, 1870, 23462, 634, 6721, 56938, 50674, 6789, 10499, 10732, 9619, 9575, 64344, 4286, 64123, 6720, 3398, 2064, 9131, 220202, 7030, 23291, 367, 10608, 7942, 4335, 406, 5304, 6877, 6899, 4613, 1869	3557	150	16472	1.42013	1	0.135438	0.129136
GOTERM_BP_DIRECT	GO:0048147~negative regulation of fibroblast proliferation	14	0.375033	0.0096462	22954, 6497, 7157, 5366, 581, 186, 10437, 4609, 3458, 26471, 84875, 4763, 4049, 6648	3590	31	16396	2.06258	1	0.0954436	0.0883606
GOTERM_BP_DIRECT	GO:0042771~intrinsic apoptotic signaling pathway in response to DNA damage by p53 class mediator	14	0.375033	0.0096462	5371, 7157, 5366, 2033, 29108, 23411, 7161, 54541, 7917, 26471, 675, 8626, 602, 4436	3590	31	16396	2.06258	1	0.0954436	0.0883606
GOTERM_BP_DIRECT	GO:0032024~positive regulation of insulin secretion	17	0.455398	0.00968132	8431, 5581, 7200, 7226, 23410, 23435, 169026, 640, 3717, 2864, 114131, 2852, 952, 2695, 57555, 5467, 6659	3590	41	16396	1.89369	1	0.0956776	0.0885772
GOTERM_BP_DIRECT	GO:0010862~positive regulation of pathway-restricted SMAD protein phosphorylation	19	0.508974	0.0100324	8200, 9573, 7046, 6386, 4089, 2022, 3077, 7040, 7042, 4838, 650, 3624, 3623, 652, 655, 2662, 9518, 659, 649	3590	48	16396	1.80782	1	0.0987318	0.0914047
GOTERM_MF_DIRECT	GO:0043236~laminin binding	12	0.321457	0.010036	3958, 7057, 3680, 131578, 1520, 2817, 3655, 3688, 4811, 3921, 3956, 43	3557	25	16472	2.22282	1	0.14056	0.13402
GOTERM_BP_DIRECT	GO:0009743~response to carbohydrate	7	0.187517	0.0101087	23394, 4067, 4199, 3553, 338, 1471, 4193	3590	10	16396	3.19699	1	0.0987318	0.0914047
GOTERM_BP_DIRECT	GO:0060009~Sertoli cell development	7	0.187517	0.0101087	4914, 6662, 546, 30812, 1471, 3295, 6382	3590	10	16396	3.19699	1	0.0987318	0.0914047
GOTERM_BP_DIRECT	GO:0060484~lung-associated mesenchyme development	7	0.187517	0.0101087	55211, 1499, 2254, 2263, 151871, 2260, 7481	3590	10	16396	3.19699	1	0.0987318	0.0914047
GOTERM_BP_DIRECT	GO:0043534~blood vessel endothelial cell migration	7	0.187517	0.0101087	2876, 335, 3397, 391104, 2185, 949, 4627	3590	10	16396	3.19699	1	0.0987318	0.0914047
GOTERM_BP_DIRECT	GO:0032691~negative regulation of interleukin-1 beta production	7	0.187517	0.0101087	1139, 4210, 2693, 7128, 89832, 409, 54	3590	10	16396	3.19699	1	0.0987318	0.0914047
GOTERM_BP_DIRECT	GO:0019371~cyclooxygenase pathway	7	0.187517	0.0101087	6916, 873, 9536, 5730, 10728, 5742, 5743	3590	10	16396	3.19699	1	0.0987318	0.0914047
GOTERM_BP_DIRECT	GO:0046888~negative regulation of hormone secretion	7	0.187517	0.0101087	3569, 3589, 7349, 1906, 9370, 5008, 3976	3590	10	16396	3.19699	1	0.0987318	0.0914047
GOTERM_BP_DIRECT	GO:0031953~negative regulation of protein autophosphorylation	7	0.187517	0.0101087	91662, 9961, 11261, 5167, 2022, 9370, 3725	3590	10	16396	3.19699	1	0.0987318	0.0914047
GOTERM_BP_DIRECT	GO:0051918~negative regulation of fibrinolysis	7	0.187517	0.0101087	7057, 5340, 5054, 7056, 2147, 5345, 350	3590	10	16396	3.19699	1	0.0987318	0.0914047
GOTERM_BP_DIRECT	GO:0005975~carbohydrate metabolic process	52	1.39298	0.0103103	8574, 64399, 23729, 8972, 2990, 8372, 8692, 27087, 231, 10855, 2548, 2821, 3038, 2629, 6520, 2681, 3373, 2710, 2673, 3643, 6517, 6519, 9365, 9761, 4199, 28, 4190, 1118, 2526, 1116, 2524, 2523, 3938, 2720, 3939, 1431, 8505, 217, 6524, 54414, 6888, 5836, 3418, 7358, 4245, 23553, 27159, 3073, 3948, 3425, 9091, 3945	3590	172	16396	1.38076	1	0.100582	0.0931181
GOTERM_BP_DIRECT	GO:0009755~hormone-mediated signaling pathway	13	0.348245	0.0104247	23636, 7253, 7200, 5781, 7067, 5972, 2693, 181, 2690, 122876, 2642, 3972, 2516	3590	28	16396	2.12045	1	0.101461	0.0939314
GOTERM_BP_DIRECT	GO:0061418~regulation of transcription from RNA polymerase II promoter in response to hypoxia	13	0.348245	0.0104247	8453, 3091, 64344, 7422, 7311, 2056, 2034, 2033, 1387, 7316, 768, 9978, 1958	3590	28	16396	2.12045	1	0.101461	0.0939314
GOTERM_MF_DIRECT	GO:0004601~peroxidase activity	11	0.294669	0.0106703	8288, 2878, 50506, 3039, 4353, 5742, 5743, 3043, 114757, 25824, 7173	3557	22	16472	2.31543	1	0.146907	0.140071
GOTERM_MF_DIRECT	GO:0035257~nuclear hormone receptor binding	11	0.294669	0.0106703	3091, 1499, 6772, 9611, 81, 2033, 5469, 23411, 135112, 10499, 1406	3557	22	16472	2.31543	1	0.146907	0.140071
GOTERM_MF_DIRECT	GO:0033613~activating transcription factor binding	11	0.294669	0.0106703	4261, 4087, 5970, 51564, 9759, 2033, 5468, 11168, 3065, 4208, 2626	3557	22	16472	2.31543	1	0.146907	0.140071
GOTERM_MF_DIRECT	GO:0005070~SH3/SH2 adaptor activity	21	0.56255	0.0107248	5781, 50618, 4068, 8631, 9402, 8027, 8412, 10140, 29760, 79368, 126669, 1124, 940, 1398, 84941, 10044, 8935, 6503, 10045, 27040, 6714	3557	56	16472	1.73658	1	0.146907	0.140071
GOTERM_BP_DIRECT	GO:0009790~embryo development	16	0.42861	0.0107253	23509, 8851, 10361, 3364, 253260, 7042, 3084, 650, 7917, 10658, 498, 79813, 83552, 5921, 5747, 3911	3590	38	16396	1.923	1	0.104144	0.0964157
GOTERM_BP_DIRECT	GO:0008625~extrinsic apoptotic signaling pathway via death domain receptors	16	0.42861	0.0107253	7132, 5295, 8784, 7124, 8797, 581, 3604, 596, 355, 1654, 356, 4763, 637, 56616, 4803, 939	3590	38	16396	1.923	1	0.104144	0.0964157
GOTERM_MF_DIRECT	GO:0044548~S100 protein binding	8	0.214305	0.0107944	6285, 177, 79026, 7430, 488, 2246, 302, 6271	3557	13	16472	2.84977	1	0.147052	0.14021
GOTERM_BP_DIRECT	GO:0051216~cartilage development	22	0.589338	0.0110953	7076, 112744, 3091, 7298, 7474, 5595, 6662, 5310, 3373, 8372, 9241, 5081, 8692, 8195, 2778, 1116, 960, 655, 3696, 1906, 538, 7704	3590	59	16396	1.703	1	0.107611	0.0996252
GOTERM_BP_DIRECT	GO:0070372~regulation of ERK1 and ERK2 cascade	12	0.321457	0.0111581	6098, 6850, 2335, 4067, 7984, 634, 6237, 5777, 2263, 2064, 1969, 3491	3590	25	16396	2.19222	1	0.107845	0.0998415
GOTERM_BP_DIRECT	GO:0001816~cytokine production	12	0.321457	0.0111581	10538, 51135, 2167, 6279, 920, 50943, 6280, 3702, 10666, 5293, 4094, 7294	3590	25	16396	2.19222	1	0.107845	0.0998415
GOTERM_BP_DIRECT	GO:0033344~cholesterol efflux	12	0.321457	0.0111581	341, 345, 335, 336, 348, 338, 19, 4864, 55937, 949, 10577, 9619	3590	25	16396	2.19222	1	0.107845	0.0998415
GOTERM_BP_DIRECT	GO:0032147~activation of protein kinase activity	18	0.482186	0.011214	5580, 3690, 7189, 5155, 7422, 6794, 2056, 2011, 5290, 7042, 7481, 796, 23394, 57521, 3146, 3643, 11035, 1813	3590	45	16396	1.82685	1	0.108259	0.100225
GOTERM_BP_DIRECT	GO:0030036~actin cytoskeleton organization	41	1.09831	0.0113595	23647, 9322, 92521, 25, 5880, 8655, 27, 4771, 29, 7984, 23002, 9260, 6093, 2302, 4763, 613, 998, 118, 119, 5216, 6624, 9659, 5879, 5592, 165904, 6386, 5154, 7114, 4287, 10163, 2317, 387, 2039, 2035, 2919, 1729, 604, 5901, 10487, 3845, 8936	3590	130	16396	1.4404	1	0.109537	0.101408
GOTERM_CC_DIRECT	GO:0030175~filopodium	24	0.642915	0.0113641	5064, 7430, 58, 59, 4771, 5420, 4254, 64005, 7412, 59341, 1020, 2195, 1525, 55740, 55585, 998, 4478, 6624, 3655, 3688, 10411, 1605, 7429, 10630	3662	70	17735	1.66045	0.999997	0.115484	0.10586
GOTERM_CC_DIRECT	GO:0031594~neuromuscular junction	20	0.535762	0.0115985	4593, 8851, 5663, 1020, 3084, 5270, 351, 1525, 2149, 1674, 1134, 5027, 5566, 9759, 3688, 10631, 859, 51008, 43, 4627	3662	55	17735	1.76108	0.999998	0.116814	0.107079
GOTERM_BP_DIRECT	GO:0051926~negative regulation of calcium ion transport	8	0.214305	0.0116706	6781, 10859, 5743, 10288, 4842, 3383, 859, 4846	3590	13	16396	2.81054	1	0.110745	0.102526
GOTERM_BP_DIRECT	GO:0031274~positive regulation of pseudopodium assembly	8	0.214305	0.0116706	10602, 3815, 1236, 6366, 324, 100287171, 998, 2150	3590	13	16396	2.81054	1	0.110745	0.102526
GOTERM_BP_DIRECT	GO:0051131~chaperone-mediated protein complex assembly	8	0.214305	0.0116706	3329, 51298, 325, 3320, 9361, 8195, 1191, 3308	3590	13	16396	2.81054	1	0.110745	0.102526
GOTERM_BP_DIRECT	GO:0045995~regulation of embryonic development	8	0.214305	0.0116706	4780, 983, 25819, 64321, 284217, 3908, 3643, 3911	3590	13	16396	2.81054	1	0.110745	0.102526
GOTERM_BP_DIRECT	GO:0045019~negative regulation of nitric oxide biosynthetic process	8	0.214305	0.0116706	9104, 3565, 3586, 857, 947, 706, 4988, 54	3590	13	16396	2.81054	1	0.110745	0.102526
GOTERM_BP_DIRECT	GO:0071318~cellular response to ATP	8	0.214305	0.0116706	7442, 6872, 57026, 6347, 5743, 6647, 64805, 7184	3590	13	16396	2.81054	1	0.110745	0.102526
GOTERM_BP_DIRECT	GO:0055089~fatty acid homeostasis	8	0.214305	0.0116706	7494, 5562, 5563, 348, 3630, 5424, 23411, 2805	3590	13	16396	2.81054	1	0.110745	0.102526
GOTERM_BP_DIRECT	GO:0008340~determination of adult lifespan	8	0.214305	0.0116706	3416, 27113, 7157, 120892, 4436, 3635, 472, 2956	3590	13	16396	2.81054	1	0.110745	0.102526
GOTERM_BP_DIRECT	GO:0003198~epithelial to mesenchymal transition involved in endocardial cushion formation	8	0.214305	0.0116706	652, 4089, 23462, 4851, 2022, 6615, 55273, 6591	3590	13	16396	2.81054	1	0.110745	0.102526
GOTERM_BP_DIRECT	GO:0098586~cellular response to virus	8	0.214305	0.0116706	9641, 103, 3456, 1432, 5600, 3592, 3965, 2736	3590	13	16396	2.81054	1	0.110745	0.102526
GOTERM_BP_DIRECT	GO:0071285~cellular response to lithium ion	8	0.214305	0.0116706	355, 1027, 2167, 3398, 811, 999, 4776, 1050	3590	13	16396	2.81054	1	0.110745	0.102526
GOTERM_BP_DIRECT	GO:0043922~negative regulation by host of viral transcription	8	0.214305	0.0116706	6351, 6352, 7023, 6348, 8091, 3065, 23435, 3725	3590	13	16396	2.81054	1	0.110745	0.102526
GOTERM_BP_DIRECT	GO:0032740~positive regulation of interleukin-17 production	8	0.214305	0.0116706	3558, 3600, 51561, 59067, 64127, 7040, 3606, 4615	3590	13	16396	2.81054	1	0.110745	0.102526
GOTERM_BP_DIRECT	GO:0046628~positive regulation of insulin receptor signaling pathway	8	0.214305	0.0116706	3630, 64710, 3952, 23411, 3667, 3481, 6714, 5590	3590	13	16396	2.81054	1	0.110745	0.102526
GOTERM_BP_DIRECT	GO:0001890~placenta development	15	0.401822	0.0118511	23089, 283, 6194, 1634, 100, 4838, 6927, 51493, 1432, 8846, 5468, 6647, 3952, 5747, 1747	3590	35	16396	1.95734	1	0.112075	0.103758
GOTERM_BP_DIRECT	GO:0048565~digestive tract development	15	0.401822	0.0118511	5310, 2263, 3274, 7040, 1281, 2625, 55366, 891, 2624, 3815, 2623, 1543, 3655, 83881, 5925	3590	35	16396	1.95734	1	0.112075	0.103758
GOTERM_BP_DIRECT	GO:0006865~amino acid transport	15	0.401822	0.0118511	6542, 153201, 6520, 6541, 6510, 26503, 8140, 4609, 117247, 340024, 7504, 11136, 10630, 6519, 54716	3590	35	16396	1.95734	1	0.112075	0.103758
GOTERM_CC_DIRECT	GO:0034366~spherical high-density lipoprotein particle	6	0.160729	0.0119411	345, 335, 336, 5444, 55937, 1191	3662	8	17735	3.63224	0.999999	0.118155	0.108308
GOTERM_CC_DIRECT	GO:0008541~proteasome regulatory particle, lid subcomplex	6	0.160729	0.0119411	5718, 5719, 5709, 11047, 5714, 7979	3662	8	17735	3.63224	0.999999	0.118155	0.108308
GOTERM_BP_DIRECT	GO:0002323~natural killer cell activation involved in immune response	10	0.267881	0.0121963	3439, 56832, 3447, 3456, 3444, 3442, 51744, 3440, 3451, 338376	3590	19	16396	2.40375	1	0.11383	0.105383
GOTERM_BP_DIRECT	GO:0007263~nitric oxide mediated signal transduction	10	0.267881	0.0121963	2357, 79625, 348, 4842, 51655, 4843, 183, 948, 4846, 186	3590	19	16396	2.40375	1	0.11383	0.105383
GOTERM_BP_DIRECT	GO:0002026~regulation of the force of heart contraction	10	0.267881	0.0121963	2548, 133, 3458, 476, 488, 1113, 8048, 8862, 4624, 4625	3590	19	16396	2.40375	1	0.11383	0.105383
GOTERM_BP_DIRECT	GO:0030325~adrenal gland development	10	0.267881	0.0121963	1028, 335, 27122, 4763, 3643, 8091, 1392, 706, 2516, 7481	3590	19	16396	2.40375	1	0.11383	0.105383
GOTERM_BP_DIRECT	GO:0043523~regulation of neuron apoptotic process	10	0.267881	0.0121963	2625, 10280, 2876, 84335, 8626, 255738, 23017, 4208, 2539, 4869	3590	19	16396	2.40375	1	0.11383	0.105383
GOTERM_BP_DIRECT	GO:0042246~tissue regeneration	10	0.267881	0.0121963	10404, 891, 347, 7104, 5653, 2255, 4851, 3484, 6657, 7294	3590	19	16396	2.40375	1	0.11383	0.105383
GOTERM_BP_DIRECT	GO:0006406~mRNA export from nucleus	33	0.884008	0.0122006	6430, 129401, 9984, 29107, 3087, 23049, 4928, 26097, 102724594, 55308, 55746, 6427, 5976, 6426, 9939, 7979, 1977, 23636, 9775, 10482, 23511, 8021, 8480, 79023, 10569, 11338, 2733, 1984, 3267, 79902, 51213, 7307, 5903	3590	100	16396	1.50715	1	0.11383	0.105383
GOTERM_BP_DIRECT	GO:0031175~neuron projection development	33	0.884008	0.0122006	4133, 11021, 8851, 4134, 22871, 1020, 27005, 351, 374, 2668, 177, 127933, 10938, 8846, 999, 2629, 8408, 9211, 4067, 4684, 5872, 5796, 26227, 2185, 3925, 3569, 55330, 1861, 26047, 3146, 7349, 4852, 5925	3590	100	16396	1.50715	1	0.11383	0.105383
GOTERM_BP_DIRECT	GO:0035458~cellular response to interferon-beta	9	0.241093	0.0122414	3093, 7098, 9447, 3456, 6772, 340061, 730249, 51428, 3659	3590	16	16396	2.56901	1	0.11383	0.105383
GOTERM_BP_DIRECT	GO:0048168~regulation of neuronal synaptic plasticity	9	0.241093	0.0122414	6285, 6770, 8997, 348, 6900, 6855, 815, 23237, 5879	3590	16	16396	2.56901	1	0.11383	0.105383
GOTERM_BP_DIRECT	GO:0014002~astrocyte development	9	0.241093	0.0122414	7099, 177, 7431, 5354, 6279, 28514, 1021, 2670, 6280	3590	16	16396	2.56901	1	0.11383	0.105383
GOTERM_BP_DIRECT	GO:0061036~positive regulation of cartilage development	9	0.241093	0.0122414	650, 7474, 6660, 652, 6662, 659, 649, 7704, 3491	3590	16	16396	2.56901	1	0.11383	0.105383
GOTERM_BP_DIRECT	GO:0003203~endocardial cushion morphogenesis	9	0.241093	0.0122414	650, 6662, 23462, 4851, 2022, 7291, 9241, 7042, 4193	3590	16	16396	2.56901	1	0.11383	0.105383
GOTERM_BP_DIRECT	GO:0006978~DNA damage response, signal transduction by p53 class mediator resulting in transcription of p21 class mediator	9	0.241093	0.0122414	672, 2305, 10524, 4582, 7023, 675, 7157, 8626, 7161	3590	16	16396	2.56901	1	0.11383	0.105383
GOTERM_BP_DIRECT	GO:0010832~negative regulation of myotube differentiation	9	0.241093	0.0122414	7494, 1048, 8841, 4851, 9759, 627, 3065, 4856, 10014	3590	16	16396	2.56901	1	0.11383	0.105383
GOTERM_CC_DIRECT	GO:0034361~very-low-density lipoprotein particle	10	0.267881	0.0122608	341, 8542, 345, 335, 336, 348, 338, 51449, 55937, 350	3662	20	17735	2.42149	0.999999	0.120262	0.11024
GOTERM_MF_DIRECT	GO:0003714~transcription corepressor activity	58	1.55371	0.01239	9541, 6597, 8535, 30818, 286205, 3281, 1810, 595, 6907, 387893, 51564, 6427, 4204, 10413, 284252, 4783, 10140, 22882, 23411, 7290, 7251, 3726, 1822, 166, 79923, 328, 4335, 7528, 10346, 8431, 6497, 8554, 23741, 9242, 57761, 2004, 9759, 10155, 9318, 51548, 6925, 5914, 64344, 9734, 5971, 8841, 9611, 27033, 861, 1488, 467, 863, 10608, 1045, 50943, 171023, 1649, 10765	3557	200	16472	1.34295	1	0.167871	0.16006
GOTERM_BP_DIRECT	GO:0042733~embryonic digit morphogenesis	21	0.56255	0.0124924	4041, 7474, 4089, 130497, 80856, 3066, 7291, 64327, 3065, 9241, 3239, 652, 27152, 1499, 1387, 4920, 4613, 7704, 1889, 65250, 2736	3590	56	16396	1.71267	1	0.116034	0.107423
GOTERM_BP_DIRECT	GO:0001658~branching involved in ureteric bud morphogenesis	17	0.455398	0.0125243	5076, 6495, 6662, 4089, 5311, 650, 2668, 596, 4609, 652, 2247, 1499, 3611, 26585, 5228, 3911, 5727	3590	42	16396	1.8486	1	0.116202	0.107578
GOTERM_BP_DIRECT	GO:0003007~heart morphogenesis	14	0.375033	0.0130505	7422, 6862, 7042, 2548, 4607, 2475, 7403, 55636, 3643, 6899, 171023, 5747, 10454, 5727	3590	32	16396	1.99812	1	0.120815	0.111849
GOTERM_BP_DIRECT	GO:0042177~negative regulation of protein catabolic process	14	0.375033	0.0130505	22933, 5582, 4088, 5970, 5245, 3084, 5270, 51582, 2534, 3630, 113451, 4843, 11213, 1956	3590	32	16396	1.99812	1	0.120815	0.111849
GOTERM_CC_DIRECT	GO:0031143~pseudopodium	9	0.241093	0.0132111	5594, 5595, 1267, 5894, 81, 4478, 408, 2150, 87	3662	17	17735	2.56393	1	0.128467	0.117761
GOTERM_CC_DIRECT	GO:0015629~actin cytoskeleton	60	1.60729	0.0133781	8178, 5463, 10095, 9260, 124590, 6708, 10735, 57026, 6622, 999, 6624, 6868, 10611, 10456, 58, 59, 2317, 10307, 10625, 26284, 2039, 3005, 11034, 800, 11078, 6710, 6877, 4854, 4778, 5868, 4659, 8936, 9564, 9001, 25, 9123, 27, 8997, 23586, 118611, 79834, 1398, 3652, 338, 53405, 31, 10677, 4703, 57727, 4627, 5914, 7430, 10163, 23237, 4082, 10602, 79026, 11133, 81, 2934	3662	218	17735	1.33293	1	0.128979	0.118231
GOTERM_CC_DIRECT	GO:0035631~CD40 receptor complex	7	0.187517	0.0136109	7187, 7189, 7188, 1147, 3551, 958, 56616	3662	11	17735	3.0819	1	0.130111	0.119269
GOTERM_BP_DIRECT	GO:0051289~protein homotetramerization	22	0.589338	0.0136261	7442, 4284, 4143, 6256, 64784, 3251, 7083, 3759, 2878, 3416, 1666, 115362, 2744, 81502, 8626, 1807, 55856, 978, 847, 6648, 31, 32	3590	60	16396	1.67461	1	0.126003	0.116652
GOTERM_CC_DIRECT	GO:0031089~platelet dense granule lumen	8	0.214305	0.0137939	7123, 3959, 7078, 5267, 6414, 3699, 3700, 350	3662	14	17735	2.76742	1	0.130752	0.119856
GOTERM_BP_DIRECT	GO:0051436~negative regulation of ubiquitin-protein ligase activity involved in mitotic cell cycle	25	0.669703	0.0138891	9861, 10393, 9184, 891, 5718, 991, 5719, 1017, 5698, 7316, 5710, 10197, 5711, 5713, 5714, 51529, 7311, 5707, 5708, 5709, 983, 5721, 51433, 5688, 5700	3590	71	16396	1.60814	1	0.128294	0.118773
GOTERM_BP_DIRECT	GO:0002062~chondrocyte differentiation	16	0.42861	0.0139726	8200, 7045, 130497, 2254, 8091, 7040, 2260, 54360, 650, 652, 861, 1432, 864, 4856, 4208, 2736	3590	39	16396	1.87369	1	0.128922	0.119355
GOTERM_MF_DIRECT	GO:0046875~ephrin receptor binding	12	0.321457	0.0140612	1942, 6386, 2534, 23294, 8851, 1398, 867, 1020, 1948, 1947, 1946, 6714	3557	26	16472	2.13732	1	0.189485	0.180668
GOTERM_BP_DIRECT	GO:0010942~positive regulation of cell death	13	0.348245	0.0143058	5245, 8313, 3043, 3240, 1392, 1788, 1027, 652, 3039, 3776, 4613, 5625, 10300	3590	29	16396	2.04733	1	0.131705	0.121931
GOTERM_BP_DIRECT	GO:0001937~negative regulation of endothelial cell proliferation	13	0.348245	0.0143058	7046, 7057, 7498, 6772, 2022, 350, 2833, 498, 348, 6678, 4763, 857, 858	3590	29	16396	2.04733	1	0.131705	0.121931
GOTERM_MF_DIRECT	GO:0001848~complement binding	6	0.160729	0.0145216	731, 721, 4179, 966, 1380, 629	3557	8	16472	3.47315	1	0.191547	0.182635
GOTERM_MF_DIRECT	GO:0031730~CCR5 chemokine receptor binding	6	0.160729	0.0145216	6351, 3716, 6352, 6772, 6774, 6348	3557	8	16472	3.47315	1	0.191547	0.182635
GOTERM_MF_DIRECT	GO:0032052~bile acid binding	6	0.160729	0.0145216	1646, 1645, 2168, 2172, 5319, 5836	3557	8	16472	3.47315	1	0.191547	0.182635
GOTERM_MF_DIRECT	GO:0030235~nitric-oxide synthase regulator activity	6	0.160729	0.0145216	808, 801, 2099, 3320, 207, 1956	3557	8	16472	3.47315	1	0.191547	0.182635
GOTERM_BP_DIRECT	GO:0034599~cellular response to oxidative stress	23	0.616126	0.0146909	7494, 22933, 4780, 25, 7001, 4255, 5587, 2177, 2176, 3065, 29957, 142, 9361, 2119, 54033, 2876, 3304, 3303, 488, 120892, 10891, 6622, 2539	3590	64	16396	1.64131	1	0.134952	0.124937
GOTERM_BP_DIRECT	GO:0030512~negative regulation of transforming growth factor beta receptor signaling pathway	23	0.616126	0.0146909	7494, 11171, 7046, 4087, 4088, 6497, 7311, 7080, 23089, 2022, 65997, 163126, 23411, 7040, 4092, 2734, 3303, 23592, 7316, 857, 858, 6868, 3309	3590	64	16396	1.64131	1	0.134952	0.124937
GOTERM_BP_DIRECT	GO:0007005~mitochondrion organization	26	0.696491	0.014708	5245, 2034, 2395, 9361, 23082, 211, 10891, 538, 858, 2629, 617, 10730, 4846, 10456, 7015, 6687, 23410, 5071, 1050, 142, 1525, 120892, 11331, 5027, 8834, 54205	3590	75	16396	1.58327	1	0.13496	0.124945
GOTERM_CC_DIRECT	GO:0000502~proteasome complex	21	0.56255	0.0148582	9861, 9097, 5707, 5718, 5708, 5719, 5709, 3315, 5698, 7415, 5710, 10197, 5688, 5721, 5700, 11047, 5711, 5887, 5713, 7979, 5714	3662	60	17735	1.69504	1	0.139667	0.128028
GOTERM_MF_DIRECT	GO:0004190~aspartic-type endopeptidase activity	11	0.294669	0.0152876	121665, 9476, 25825, 81502, 5663, 5664, 5972, 1509, 5304, 836, 23621	3557	23	16472	2.21476	1	0.20059	0.191256
GOTERM_BP_DIRECT	GO:0034128~negative regulation of MyD88-independent toll-like receptor signaling pathway	6	0.160729	0.015424	929, 7099, 7098, 23098, 23643, 148022	3590	8	16396	3.42535	1	0.138633	0.128345
GOTERM_BP_DIRECT	GO:0033598~mammary gland epithelial cell proliferation	6	0.160729	0.015424	595, 5594, 3398, 6778, 1969, 1051	3590	8	16396	3.42535	1	0.138633	0.128345
GOTERM_BP_DIRECT	GO:0071493~cellular response to UV-B	6	0.160729	0.015424	6794, 4311, 1396, 3373, 8372, 8692	3590	8	16396	3.42535	1	0.138633	0.128345
GOTERM_BP_DIRECT	GO:0002221~pattern recognition receptor signaling pathway	6	0.160729	0.015424	8993, 64581, 1755, 8685, 57115, 85363	3590	8	16396	3.42535	1	0.138633	0.128345
GOTERM_BP_DIRECT	GO:0042129~regulation of T cell proliferation	6	0.160729	0.015424	3958, 5880, 1499, 6654, 30835, 246778	3590	8	16396	3.42535	1	0.138633	0.128345
GOTERM_BP_DIRECT	GO:0009308~amine metabolic process	6	0.160729	0.015424	6817, 1543, 26, 314, 7412, 8639	3590	8	16396	3.42535	1	0.138633	0.128345
GOTERM_BP_DIRECT	GO:0060396~growth hormone receptor signaling pathway	6	0.160729	0.015424	5295, 3717, 2688, 6774, 2690, 5747	3590	8	16396	3.42535	1	0.138633	0.128345
GOTERM_BP_DIRECT	GO:0046825~regulation of protein export from nucleus	6	0.160729	0.015424	1029, 5781, 127933, 57510, 7514, 3429	3590	8	16396	3.42535	1	0.138633	0.128345
GOTERM_BP_DIRECT	GO:0006527~arginine catabolic process	6	0.160729	0.015424	435, 4842, 4843, 2184, 4846, 383	3590	8	16396	3.42535	1	0.138633	0.128345
GOTERM_BP_DIRECT	GO:0032471~negative regulation of endoplasmic reticulum calcium ion concentration	6	0.160729	0.015424	487, 27113, 578, 51024, 581, 7052	3590	8	16396	3.42535	1	0.138633	0.128345
GOTERM_BP_DIRECT	GO:0050891~multicellular organismal water homeostasis	6	0.160729	0.015424	6340, 551, 6337, 59341, 6338, 361	3590	8	16396	3.42535	1	0.138633	0.128345
GOTERM_BP_DIRECT	GO:0031102~neuron projection regeneration	6	0.160729	0.015424	133, 5792, 335, 348, 2670, 8408	3590	8	16396	3.42535	1	0.138633	0.128345
GOTERM_BP_DIRECT	GO:0007183~SMAD protein complex assembly	6	0.160729	0.015424	4087, 4088, 4089, 163126, 7040, 9372	3590	8	16396	3.42535	1	0.138633	0.128345
GOTERM_BP_DIRECT	GO:0033993~response to lipid	6	0.160729	0.015424	2624, 2695, 5468, 948, 4923, 9619	3590	8	16396	3.42535	1	0.138633	0.128345
GOTERM_BP_DIRECT	GO:0035234~ectopic germ cell programmed cell death	6	0.160729	0.015424	5591, 3815, 4254, 3553, 3552, 581	3590	8	16396	3.42535	1	0.138633	0.128345
GOTERM_BP_DIRECT	GO:0048762~mesenchymal cell differentiation	6	0.160729	0.015424	650, 7046, 655, 2263, 8091, 2260	3590	8	16396	3.42535	1	0.138633	0.128345
GOTERM_BP_DIRECT	GO:0043497~regulation of protein heterodimerization activity	6	0.160729	0.015424	596, 50937, 578, 998, 581, 3084	3590	8	16396	3.42535	1	0.138633	0.128345
GOTERM_BP_DIRECT	GO:0009629~response to gravity	6	0.160729	0.015424	632, 2353, 6678, 8061, 5315, 6804	3590	8	16396	3.42535	1	0.138633	0.128345
GOTERM_BP_DIRECT	GO:0006910~phagocytosis, recognition	6	0.160729	0.015424	7275, 64581, 4240, 3543, 100423062, 948	3590	8	16396	3.42535	1	0.138633	0.128345
GOTERM_BP_DIRECT	GO:0031145~anaphase-promoting complex-dependent catabolic process	27	0.723279	0.0154711	9861, 6790, 8452, 10393, 9184, 891, 5718, 991, 5719, 5698, 7316, 6502, 5710, 10197, 5711, 5713, 5714, 51529, 7311, 5707, 5708, 5709, 983, 5721, 51433, 5688, 5700	3590	79	16396	1.56092	1	0.138906	0.128598
GOTERM_BP_DIRECT	GO:0050714~positive regulation of protein secretion	15	0.401822	0.0155659	7430, 7424, 3552, 2243, 3596, 7040, 283, 7042, 135, 3479, 2244, 2266, 5478, 5319, 43	3590	36	16396	1.90297	1	0.139321	0.128982
GOTERM_BP_DIRECT	GO:0010507~negative regulation of autophagy	15	0.401822	0.0155659	3082, 22933, 9711, 4233, 4170, 596, 598, 100287171, 2475, 54922, 207, 3952, 3953, 2626, 1977	3590	36	16396	1.90297	1	0.139321	0.128982
GOTERM_BP_DIRECT	GO:0006027~glycosaminoglycan catabolic process	12	0.321457	0.0155841	10855, 6383, 3425, 2720, 3423, 2990, 23553, 2817, 8692, 4669, 10894, 6382	3590	26	16396	2.10791	1	0.139321	0.128982
GOTERM_BP_DIRECT	GO:0045070~positive regulation of viral genome replication	12	0.321457	0.0155841	7153, 6352, 1654, 103, 104, 3434, 940, 4851, 5478, 26986, 6732, 23367	3590	26	16396	2.10791	1	0.139321	0.128982
GOTERM_BP_DIRECT	GO:0006412~translation	70	1.87517	0.0156875	6230, 6155, 6232, 6231, 6234, 6159, 6235, 2197, 6191, 6193, 6192, 6194, 55168, 51121, 6227, 5610, 438, 6229, 6228, 7453, 6122, 6124, 6167, 6203, 6202, 25873, 29957, 1468, 207, 219927, 3921, 4736, 53918, 6132, 6135, 6137, 6576, 6136, 292, 6171, 293, 6173, 2966, 83733, 10318, 6204, 6129, 6209, 6208, 1956, 5250, 6141, 6144, 6188, 6187, 6143, 64146, 6223, 8402, 7311, 6189, 6222, 6301, 6224, 3035, 735…	3590	248	16396	1.28911	1	0.140096	0.129699
GOTERM_BP_DIRECT	GO:1904837~beta-catenin-TCF complex assembly	17	0.455398	0.0159806	7088, 6597, 7015, 4221, 8313, 2033, 3065, 8361, 26108, 8362, 8360, 10524, 4609, 1499, 51176, 1387, 6932	3590	43	16396	1.80561	1	0.142561	0.131981
GOTERM_BP_DIRECT	GO:0009617~response to bacterium	11	0.294669	0.016828	1118, 171389, 961, 1233, 1672, 51752, 6347, 857, 4843, 246778, 7429	3590	23	16396	2.18428	1	0.14948	0.138387
GOTERM_BP_DIRECT	GO:0071398~cellular response to fatty acid	11	0.294669	0.016828	2867, 891, 3949, 5166, 7520, 6720, 1385, 1906, 6714, 1869, 7350	3590	23	16396	2.18428	1	0.14948	0.138387
GOTERM_BP_DIRECT	GO:0030316~osteoclast differentiation	11	0.294669	0.016828	3726, 1436, 7189, 1435, 1499, 7037, 7124, 1432, 799, 1880, 1969	3590	23	16396	2.18428	1	0.14948	0.138387
GOTERM_BP_DIRECT	GO:0016239~positive regulation of macroautophagy	11	0.294669	0.016828	1634, 3091, 3791, 5563, 23411, 23367, 8878, 2629, 3162, 8408, 10533	3590	23	16396	2.18428	1	0.14948	0.138387
GOTERM_MF_DIRECT	GO:0042834~peptidoglycan binding	7	0.187517	0.0169671	8993, 3512, 57115, 64127, 114548, 7097, 54209	3557	11	16472	2.94692	1	0.219166	0.208968
GOTERM_MF_DIRECT	GO:0070182~DNA polymerase binding	7	0.187517	0.0169671	65057, 6597, 5111, 3146, 2177, 5888, 9361	3557	11	16472	2.94692	1	0.219166	0.208968
GOTERM_MF_DIRECT	GO:0048156~tau protein binding	7	0.187517	0.0169671	6285, 348, 26574, 3320, 6622, 10013, 1859	3557	11	16472	2.94692	1	0.219166	0.208968
GOTERM_CC_DIRECT	GO:0005623~cell	31	0.830431	0.0169986	7046, 6375, 7001, 6355, 6354, 6357, 3558, 2149, 3579, 1356, 56155, 60675, 535, 56477, 799, 4988, 3934, 7296, 6366, 5034, 6346, 3098, 9131, 169026, 6916, 348, 57817, 6358, 4852, 10563, 5768	3662	100	17735	1.50132	1	0.158466	0.145261
GOTERM_MF_DIRECT	GO:0051059~NF-kappaB binding	13	0.348245	0.0172544	4792, 5970, 8841, 3066, 3065, 1029, 2932, 80279, 5467, 328, 50943, 4869, 8915	3557	30	16472	2.00671	1	0.219726	0.209502
GOTERM_MF_DIRECT	GO:0008656~cysteine-type endopeptidase activator activity involved in apoptotic process	9	0.241093	0.0172749	91662, 22900, 1512, 1027, 834, 29108, 317, 836, 22861	3557	17	16472	2.45164	1	0.219726	0.209502
GOTERM_MF_DIRECT	GO:0005132~type I interferon receptor binding	9	0.241093	0.0172749	3439, 56832, 3447, 3456, 3444, 3442, 3440, 3451, 338376	3557	17	16472	2.45164	1	0.219726	0.209502
GOTERM_BP_DIRECT	GO:0060021~palate development	26	0.696491	0.0174702	7341, 7046, 7122, 64651, 6497, 130497, 6654, 9242, 7042, 7020, 6591, 7481, 3638, 2048, 4208, 89780, 7474, 4087, 4089, 7291, 3624, 51176, 8879, 55636, 6615, 65250	3590	76	16396	1.56244	1	0.15502	0.143516
GOTERM_MF_DIRECT	GO:0004089~carbonate dehydratase activity	8	0.214305	0.0176151	760, 761, 762, 763, 765, 766, 768, 759	3557	14	16472	2.64621	1	0.222916	0.212543
GOTERM_BP_DIRECT	GO:0045664~regulation of neuron differentiation	10	0.267881	0.0179395	64919, 8320, 50937, 6495, 55755, 8851, 80279, 22871, 53637, 4803	3590	20	16396	2.28357	1	0.157916	0.146197
GOTERM_BP_DIRECT	GO:0019229~regulation of vasoconstriction	10	0.267881	0.0179395	8864, 3269, 624, 1906, 183, 59272, 151, 185, 1889, 1636	3590	20	16396	2.28357	1	0.157916	0.146197
GOTERM_BP_DIRECT	GO:0042474~middle ear morphogenesis	10	0.267881	0.0179395	3638, 145258, 6495, 10194, 130497, 1906, 6899, 9241, 2260, 4669	3590	20	16396	2.28357	1	0.157916	0.146197
GOTERM_CC_DIRECT	GO:0014069~postsynaptic density	51	1.36619	0.0179728	5064, 5582, 9463, 4131, 8851, 4134, 9148, 22871, 1020, 476, 119, 8927, 1813, 2902, 10611, 2901, 4067, 254263, 2039, 4137, 408, 2915, 409, 6714, 4218, 4615, 9201, 8831, 8997, 6654, 8313, 23542, 3459, 4905, 135, 613, 659, 815, 818, 10280, 2185, 23237, 57534, 4915, 2932, 1600, 102, 2534, 2852, 10486, 5727	3662	183	17735	1.34968	1	0.166175	0.152327
GOTERM_BP_DIRECT	GO:0051260~protein homooligomerization	52	1.39298	0.018016	5066, 22871, 3162, 355, 10938, 27243, 317, 10211, 637, 284252, 2703, 7450, 5551, 58484, 114897, 3297, 55054, 9076, 2040, 7052, 1861, 57674, 5621, 8737, 11035, 9641, 6532, 27348, 9361, 79792, 3416, 51024, 7415, 56916, 857, 6767, 6648, 6529, 4869, 3736, 9211, 38, 10361, 9370, 9451, 6580, 581, 1645, 1365, 5888, 10367, 8915	3590	177	16396	1.34176	1	0.157916	0.146197
GOTERM_MF_DIRECT	GO:0008237~metallopeptidase activity	27	0.723279	0.0181224	9520, 64174, 10072, 4012, 5069, 4311, 290, 2028, 55748, 10730, 5119, 6868, 1636, 11093, 64167, 84909, 59272, 57393, 2515, 84735, 102, 4313, 9427, 4314, 649, 4318, 9509	3557	81	16472	1.54362	1	0.227031	0.216467
GOTERM_MF_DIRECT	GO:0003690~double-stranded DNA binding	27	0.723279	0.0181224	9447, 7520, 6772, 1385, 64710, 23586, 5937, 4609, 1499, 79811, 2002, 8626, 1956, 5591, 22944, 4087, 7157, 4221, 3131, 23435, 80298, 2237, 3146, 5888, 4436, 7704, 2956	3557	81	16472	1.54362	1	0.227031	0.216467
GOTERM_BP_DIRECT	GO:0021904~dorsal/ventral neural tube patterning	7	0.187517	0.0181563	145258, 6608, 89780, 652, 3169, 5663, 5081	3590	11	16396	2.90636	1	0.157916	0.146197
GOTERM_BP_DIRECT	GO:0048711~positive regulation of astrocyte differentiation	7	0.187517	0.0181563	3280, 650, 4851, 3398, 3572, 3976, 5270	3590	11	16396	2.90636	1	0.157916	0.146197
GOTERM_BP_DIRECT	GO:0045745~positive regulation of G-protein coupled receptor protein signaling pathway	7	0.187517	0.0181563	2852, 25818, 5245, 11251, 5653, 1813, 718	3590	11	16396	2.90636	1	0.157916	0.146197
GOTERM_BP_DIRECT	GO:0043306~positive regulation of mast cell degranulation	7	0.187517	0.0181563	2624, 2205, 6850, 3566, 3565, 3596, 7535	3590	11	16396	2.90636	1	0.157916	0.146197
GOTERM_BP_DIRECT	GO:0045060~negative thymic T cell selection	7	0.187517	0.0181563	355, 1236, 972, 940, 326, 7535, 916	3590	11	16396	2.90636	1	0.157916	0.146197
GOTERM_BP_DIRECT	GO:0050732~negative regulation of peptidyl-tyrosine phosphorylation	7	0.187517	0.0181563	5580, 2039, 10507, 5777, 64092, 6690, 5590	3590	11	16396	2.90636	1	0.157916	0.146197
GOTERM_BP_DIRECT	GO:0045820~negative regulation of glycolytic process	7	0.187517	0.0181563	54541, 863, 5465, 6774, 10891, 9759, 51548	3590	11	16396	2.90636	1	0.157916	0.146197
GOTERM_BP_DIRECT	GO:0046622~positive regulation of organ growth	7	0.187517	0.0181563	170302, 6608, 54440, 3574, 5897, 3142, 10413	3590	11	16396	2.90636	1	0.157916	0.146197
GOTERM_BP_DIRECT	GO:0003181~atrioventricular valve morphogenesis	7	0.187517	0.0181563	650, 4851, 659, 161882, 7042, 3491, 4193	3590	11	16396	2.90636	1	0.157916	0.146197
GOTERM_BP_DIRECT	GO:0050927~positive regulation of positive chemotaxis	7	0.187517	0.0181563	4088, 7422, 3791, 1233, 2152, 2150, 1901	3590	11	16396	2.90636	1	0.157916	0.146197
GOTERM_BP_DIRECT	GO:0032700~negative regulation of interleukin-17 production	7	0.187517	0.0181563	7099, 3458, 5621, 7040, 3592, 50943, 26525	3590	11	16396	2.90636	1	0.157916	0.146197
GOTERM_BP_DIRECT	GO:0006559~L-phenylalanine catabolic process	7	0.187517	0.0181563	3081, 2954, 5053, 259307, 6898, 2184, 80150	3590	11	16396	2.90636	1	0.157916	0.146197
GOTERM_BP_DIRECT	GO:0051279~regulation of release of sequestered calcium ion into cytosol	7	0.187517	0.0181563	5581, 4067, 5587, 1729, 5777, 2185, 84959	3590	11	16396	2.90636	1	0.157916	0.146197
GOTERM_BP_DIRECT	GO:0051024~positive regulation of immunoglobulin secretion	7	0.187517	0.0181563	7494, 3569, 3558, 3567, 90865, 3133, 7293	3590	11	16396	2.90636	1	0.157916	0.146197
GOTERM_BP_DIRECT	GO:0030851~granulocyte differentiation	7	0.187517	0.0181563	6670, 863, 1440, 6688, 161882, 23028, 1050	3590	11	16396	2.90636	1	0.157916	0.146197
GOTERM_BP_DIRECT	GO:0035264~multicellular organism growth	27	0.723279	0.0182632	50506, 5781, 6654, 3021, 3087, 6491, 29123, 6608, 5916, 10959, 80169, 998, 118, 5930, 6668, 5914, 2067, 2263, 2778, 1028, 367, 546, 2475, 5324, 7403, 80351, 2538	3590	80	16396	1.54141	1	0.15868	0.146904
GOTERM_CC_DIRECT	GO:0005782~peroxisomal matrix	17	0.455398	0.0183353	5264, 8540, 5443, 3295, 25824, 570, 3329, 3417, 3416, 189, 1610, 55711, 2168, 84188, 51268, 847, 10005	3662	46	17735	1.7898	1	0.168148	0.154136
GOTERM_CC_DIRECT	GO:0031226~intrinsic component of plasma membrane	12	0.321457	0.0186196	7099, 27242, 9213, 7442, 5156, 214, 5159, 923, 23643, 7097, 1901, 7052	3662	28	17735	2.07556	1	0.169378	0.155263
GOTERM_BP_DIRECT	GO:0060041~retina development in camera-type eye	21	0.56255	0.0187529	7275, 6240, 6497, 6662, 6101, 5158, 5961, 28514, 2782, 581, 4915, 23093, 5818, 3565, 30812, 10461, 83552, 55636, 343035, 5979, 43	3590	58	16396	1.65362	1	0.161423	0.149444
GOTERM_BP_DIRECT	GO:0071276~cellular response to cadmium ion	9	0.241093	0.018753	1536, 7341, 4493, 6770, 1544, 3297, 6647, 5536, 3162	3590	17	16396	2.41789	1	0.161423	0.149444
GOTERM_BP_DIRECT	GO:0042325~regulation of phosphorylation	9	0.241093	0.018753	22933, 26472, 3565, 655, 5663, 5884, 2022, 3551, 253260	3590	17	16396	2.41789	1	0.161423	0.149444
GOTERM_BP_DIRECT	GO:0002076~osteoblast development	9	0.241093	0.018753	4041, 3727, 4088, 632, 4221, 9759, 5744, 2736, 43	3590	17	16396	2.41789	1	0.161423	0.149444
GOTERM_BP_DIRECT	GO:0048535~lymph node development	9	0.241093	0.018753	6097, 3600, 643, 3575, 4049, 10563, 11035, 7040, 4050	3590	17	16396	2.41789	1	0.161423	0.149444
GOTERM_BP_DIRECT	GO:0055093~response to hyperoxia	9	0.241093	0.018753	1019, 4519, 1543, 5159, 2056, 3066, 3065, 847, 6648	3590	17	16396	2.41789	1	0.161423	0.149444
GOTERM_BP_DIRECT	GO:0070542~response to fatty acid	9	0.241093	0.018753	6916, 2864, 5444, 5743, 847, 1490, 948, 7097, 2170	3590	17	16396	2.41789	1	0.161423	0.149444
GOTERM_BP_DIRECT	GO:0048514~blood vessel morphogenesis	9	0.241093	0.018753	1545, 6850, 6654, 2321, 5345, 1000, 3397, 5921, 6899	3590	17	16396	2.41789	1	0.161423	0.149444
GOTERM_BP_DIRECT	GO:0051893~regulation of focal adhesion assembly	9	0.241093	0.018753	1613, 9475, 7248, 26585, 6548, 2042, 5747, 1946, 6093	3590	17	16396	2.41789	1	0.161423	0.149444
GOTERM_BP_DIRECT	GO:0043537~negative regulation of blood vessel endothelial cell migration	8	0.214305	0.0189869	7057, 2247, 3146, 348, 51378, 7040, 186, 285	3590	14	16396	2.60979	1	0.161437	0.149456
GOTERM_BP_DIRECT	GO:0045579~positive regulation of B cell differentiation	8	0.214305	0.0189869	7494, 695, 6850, 4323, 7535, 639, 3635, 939	3590	14	16396	2.60979	1	0.161437	0.149456
GOTERM_BP_DIRECT	GO:2001241~positive regulation of extrinsic apoptotic signaling pathway in absence of ligand	8	0.214305	0.0189869	1613, 3624, 355, 5499, 4763, 7042, 581, 5979	3590	14	16396	2.60979	1	0.161437	0.149456
GOTERM_BP_DIRECT	GO:1901224~positive regulation of NIK/NF-kappaB signaling	8	0.214305	0.0189869	6188, 84868, 7124, 3146, 5610, 811, 81, 64127	3590	14	16396	2.60979	1	0.161437	0.149456
GOTERM_BP_DIRECT	GO:0001516~prostaglandin biosynthetic process	8	0.214305	0.0189869	4282, 972, 9536, 5730, 10728, 5742, 1906, 5743	3590	14	16396	2.60979	1	0.161437	0.149456
GOTERM_BP_DIRECT	GO:2000147~positive regulation of cell motility	8	0.214305	0.0189869	22954, 1436, 1236, 6366, 1366, 208, 7291, 4072	3590	14	16396	2.60979	1	0.161437	0.149456
GOTERM_BP_DIRECT	GO:1902176~negative regulation of oxidative stress-induced intrinsic apoptotic signaling pathway	8	0.214305	0.0189869	2876, 3315, 4780, 8996, 3630, 207, 23411, 6648	3590	14	16396	2.60979	1	0.161437	0.149456
GOTERM_BP_DIRECT	GO:0042176~regulation of protein catabolic process	8	0.214305	0.0189869	9146, 5707, 5709, 5045, 998, 7514, 4953, 4193	3590	14	16396	2.60979	1	0.161437	0.149456
GOTERM_BP_DIRECT	GO:0045821~positive regulation of glycolytic process	8	0.214305	0.0189869	3091, 4609, 3479, 5562, 5563, 5027, 3630, 3643	3590	14	16396	2.60979	1	0.161437	0.149456
GOTERM_BP_DIRECT	GO:0060065~uterus development	8	0.214305	0.0189869	2625, 1028, 7474, 4089, 668, 2099, 6714, 7042	3590	14	16396	2.60979	1	0.161437	0.149456
GOTERM_BP_DIRECT	GO:0071354~cellular response to interleukin-6	8	0.214305	0.0189869	4790, 5970, 820, 5245, 57817, 10891, 6347, 6404	3590	14	16396	2.60979	1	0.161437	0.149456
GOTERM_BP_DIRECT	GO:0014912~negative regulation of smooth muscle cell migration	8	0.214305	0.0189869	5054, 3611, 4035, 10891, 5467, 3486, 328, 9370	3590	14	16396	2.60979	1	0.161437	0.149456
GOTERM_CC_DIRECT	GO:0046696~lipopolysaccharide receptor complex	5	0.133941	0.0189966	929, 3329, 7099, 23643, 8915	3662	6	17735	4.03582	1	0.170065	0.155893
GOTERM_CC_DIRECT	GO:0097208~alveolar lamellar body	5	0.133941	0.0189966	9476, 1512, 3916, 7879, 6439	3662	6	17735	4.03582	1	0.170065	0.155893
GOTERM_MF_DIRECT	GO:0005496~steroid binding	12	0.321457	0.0191924	10857, 5241, 6462, 2852, 1576, 367, 6783, 2100, 2908, 54658, 2099, 4306	3557	27	16472	2.05816	1	0.238043	0.226966
GOTERM_MF_DIRECT	GO:0004177~aminopeptidase activity	12	0.321457	0.0191924	9520, 1512, 2028, 10988, 51056, 64167, 4012, 7512, 290, 51752, 84909, 1804	3557	27	16472	2.05816	1	0.238043	0.226966
GOTERM_BP_DIRECT	GO:0006521~regulation of cellular amino acid metabolic process	19	0.508974	0.0196018	9861, 5707, 5718, 5708, 5719, 51582, 5709, 5698, 3630, 5710, 10197, 5688, 5721, 5700, 5711, 1728, 4953, 5713, 5714	3590	51	16396	1.70148	1	0.166326	0.153982
GOTERM_BP_DIRECT	GO:0007519~skeletal muscle tissue development	19	0.508974	0.0196018	6495, 8048, 9148, 2033, 1020, 3142, 79784, 2317, 1634, 2006, 1432, 4763, 857, 79828, 6901, 4868, 8837, 905, 4208	3590	51	16396	1.70148	1	0.166326	0.153982
GOTERM_CC_DIRECT	GO:0000785~chromatin	28	0.750067	0.0196518	5422, 64710, 8091, 1063, 3065, 3141, 7161, 4094, 1019, 10735, 894, 23063, 10473, 5514, 5976, 4780, 4221, 3726, 3727, 10769, 5885, 5469, 5888, 4613, 408, 5901, 3646, 5925	3662	89	17735	1.52363	1	0.174545	0.16
GOTERM_BP_DIRECT	GO:0000902~cell morphogenesis	22	0.589338	0.0200433	3082, 50507, 6102, 7421, 7940, 7042, 3084, 1191, 2811, 1432, 3575, 26585, 5027, 118, 10178, 10486, 604, 5469, 6789, 10630, 10487, 10413	3590	62	16396	1.62059	1	0.1699	0.157291
GOTERM_BP_DIRECT	GO:0051898~negative regulation of protein kinase B signaling	15	0.401822	0.0201097	7498, 9314, 23411, 8692, 79594, 5728, 55024, 2852, 10519, 7249, 1969, 1605, 1649, 409, 1813	3590	37	16396	1.85154	1	0.170278	0.157641
GOTERM_BP_DIRECT	GO:0006879~cellular iron ion homeostasis	17	0.455398	0.0201287	22, 3091, 7037, 4089, 3077, 2395, 3263, 3163, 3162, 4609, 1356, 9429, 57817, 7018, 6647, 10058, 3934	3590	44	16396	1.76457	1	0.170278	0.157641
GOTERM_MF_DIRECT	GO:0043130~ubiquitin binding	26	0.696491	0.0205947	22954, 22933, 9246, 8078, 4077, 7345, 8975, 8315, 9184, 3416, 3315, 58476, 51366, 11047, 23636, 7153, 8864, 4088, 91544, 7852, 5071, 7251, 8480, 7128, 8878, 8915	3557	78	16472	1.54362	1	0.254171	0.242344
GOTERM_MF_DIRECT	GO:0005198~structural molecule activity	64	1.71444	0.0211497	4131, 7122, 4133, 3880, 4134, 3882, 2670, 25984, 632, 2266, 3872, 6700, 118, 119, 10376, 5414, 3996, 3875, 6704, 6703, 3713, 3911, 9276, 9475, 8661, 6641, 5354, 3892, 2243, 9076, 3848, 444, 2312, 2035, 342574, 3886, 6698, 23542, 5719, 1674, 574414, 1475, 2244, 3851, 3852, 9119, 857, 3853, 3855, 4747, 3856, 7431, 4000, 182, 51350, 192666, 301, 1366, 3908, 1365, 3861, 6699, 10763, 3868	3557	230	16472	1.28859	1	0.25702	0.245061
GOTERM_BP_DIRECT	GO:0006298~mismatch repair	12	0.321457	0.0212043	5395, 10714, 25, 5111, 6117, 5424, 4436, 11277, 7161, 29072, 4292, 2956	3590	27	16396	2.02984	1	0.178832	0.16556
GOTERM_BP_DIRECT	GO:0055007~cardiac muscle cell differentiation	12	0.321457	0.0212043	50507, 8289, 34, 650, 150094, 652, 7248, 811, 6548, 3688, 2627, 3084	3590	27	16396	2.02984	1	0.178832	0.16556
GOTERM_BP_DIRECT	GO:0014065~phosphatidylinositol 3-kinase signaling	12	0.321457	0.0212043	2625, 22933, 7494, 5295, 7301, 3479, 4763, 1906, 2064, 3667, 3480, 5293	3590	27	16396	2.02984	1	0.178832	0.16556
GOTERM_MF_DIRECT	GO:0008013~beta-catenin binding	27	0.723279	0.0212251	8650, 5663, 8313, 1000, 2033, 2099, 4092, 23426, 6907, 10297, 999, 10013, 9739, 4088, 64321, 6662, 9314, 5796, 116931, 5071, 1525, 2932, 367, 324, 51176, 1003, 6932	3557	82	16472	1.5248	1	0.25702	0.245061
GOTERM_BP_DIRECT	GO:0007200~phospholipase C-activating G-protein coupled receptor signaling pathway	23	0.616126	0.0212295	5030, 9002, 3354, 2782, 2099, 183, 185, 1910, 84539, 2149, 146, 2358, 3579, 2357, 3269, 5733, 53831, 4986, 6869, 2837, 728, 4988, 719	3590	66	16396	1.59158	1	0.178864	0.16559
GOTERM_MF_DIRECT	GO:0042162~telomeric DNA binding	11	0.294669	0.0212379	65057, 4691, 7015, 7520, 7014, 80169, 100134934, 80119, 5976, 23049, 23028	3557	24	16472	2.12248	1	0.25702	0.245061
GOTERM_MF_DIRECT	GO:0071889~14-3-3 protein binding	11	0.294669	0.0212379	54541, 150094, 5581, 5298, 57521, 51564, 207, 409, 10971, 4659, 5590	3557	24	16472	2.12248	1	0.25702	0.245061
GOTERM_CC_DIRECT	GO:0019897~extrinsic component of plasma membrane	11	0.294669	0.0213687	4240, 8650, 9101, 22848, 302, 5652, 8411, 6768, 6281, 5879, 84958	3662	25	17735	2.13091	1	0.186133	0.170622
GOTERM_CC_DIRECT	GO:0032993~protein-DNA complex	11	0.294669	0.0213687	3727, 5076, 4780, 1499, 51176, 30818, 8091, 5469, 3087, 1649, 4802	3662	25	17735	2.13091	1	0.186133	0.170622
GOTERM_CC_DIRECT	GO:0005776~autophagosome	21	0.56255	0.0214515	9474, 9001, 4077, 8678, 4210, 29978, 55054, 22863, 148022, 58476, 1201, 84557, 100287171, 3553, 81631, 10241, 55823, 8878, 6737, 57617, 8408	3662	62	17735	1.64036	1	0.186133	0.170622
GOTERM_BP_DIRECT	GO:0035176~social behavior	18	0.482186	0.0221513	9378, 5020, 8997, 6532, 23542, 8195, 5728, 551, 552, 310, 54413, 26047, 2475, 7349, 4204, 6899, 3845, 2902	3590	48	16396	1.71267	1	0.186442	0.172606
GOTERM_MF_DIRECT	GO:0030297~transmembrane receptor protein tyrosine kinase activator activity	5	0.133941	0.0223172	1950, 26585, 51378, 1946, 3084	3557	6	16472	3.85906	1	0.263682	0.251413
GOTERM_MF_DIRECT	GO:0008131~primary amine oxidase activity	5	0.133941	0.0223172	26, 314, 7412, 4128, 8639	3557	6	16472	3.85906	1	0.263682	0.251413
GOTERM_MF_DIRECT	GO:0032405~MutLalpha complex binding	5	0.133941	0.0223172	5111, 545, 4436, 11277, 2956	3557	6	16472	3.85906	1	0.263682	0.251413
GOTERM_MF_DIRECT	GO:0019957~C-C chemokine binding	5	0.133941	0.0223172	1238, 1235, 1234, 2532, 1230	3557	6	16472	3.85906	1	0.263682	0.251413
GOTERM_MF_DIRECT	GO:0008508~bile acid:sodium symporter activity	5	0.133941	0.0223172	201780, 6555, 6554, 347051, 8273	3557	6	16472	3.85906	1	0.263682	0.251413
GOTERM_CC_DIRECT	GO:0016600~flotillin complex	6	0.160729	0.0223355	6531, 1499, 867, 999, 10211, 2319	3662	9	17735	3.22865	1	0.192324	0.176297
GOTERM_BP_DIRECT	GO:0007585~respiratory gaseous exchange	14	0.375033	0.0225342	1080, 6441, 653509, 6440, 1909, 3340, 729238, 1137, 2006, 9407, 1906, 4204, 6439, 2902	3590	34	16396	1.88058	1	0.189016	0.174989
GOTERM_BP_DIRECT	GO:0030282~bone mineralization	14	0.375033	0.0225342	50506, 7123, 4322, 8313, 1594, 2263, 9451, 3381, 7481, 55366, 650, 246, 632, 5743	3590	34	16396	1.88058	1	0.189016	0.174989
GOTERM_BP_DIRECT	GO:0030163~protein catabolic process	16	0.42861	0.0226913	9476, 25825, 4012, 5972, 9622, 23621, 9361, 55850, 1201, 259, 1991, 2475, 207, 5700, 1509, 8805	3590	41	16396	1.78229	1	0.189016	0.174989
GOTERM_MF_DIRECT	GO:0004407~histone deacetylase activity	15	0.401822	0.0228402	22933, 9734, 8841, 3066, 23411, 3065, 23028, 79885, 83933, 55869, 51742, 9759, 10013, 9219, 10014	3557	38	16472	1.82797	1	0.268588	0.256091
GOTERM_BP_DIRECT	GO:0007517~muscle organ development	29	0.776855	0.0228523	5463, 2273, 1063, 3479, 859, 3679, 3911, 4703, 4208, 7494, 6300, 4000, 6443, 6442, 6445, 163126, 7291, 23411, 1293, 9099, 1489, 1960, 3908, 6876, 8910, 6899, 6717, 43, 3627	3590	89	16396	1.48817	1	0.189016	0.174989
GOTERM_BP_DIRECT	GO:0006465~signal peptide processing	11	0.294669	0.0233052	121665, 81502, 5045, 2621, 2159, 2147, 632, 2158, 5125, 5624, 5627	3590	24	16396	2.09327	1	0.189016	0.174989
GOTERM_BP_DIRECT	GO:0045648~positive regulation of erythrocyte differentiation	11	0.294669	0.0233052	2624, 3091, 3624, 2623, 1432, 3398, 5600, 9636, 5469, 3635, 23028	3590	24	16396	2.09327	1	0.189016	0.174989
GOTERM_BP_DIRECT	GO:0051149~positive regulation of muscle cell differentiation	11	0.294669	0.0233052	25, 50937, 1499, 6300, 1432, 91653, 998, 1000, 5600, 4208, 5936	3590	24	16396	2.09327	1	0.189016	0.174989
GOTERM_BP_DIRECT	GO:0003081~regulation of systemic arterial blood pressure by renin-angiotensin	5	0.133941	0.0234542	2028, 183, 59272, 185, 1636	3590	6	16396	3.80594	1	0.189016	0.174989
GOTERM_BP_DIRECT	GO:0038084~vascular endothelial growth factor signaling pathway	5	0.133941	0.0234542	7422, 2322, 2321, 2296, 8828	3590	6	16396	3.80594	1	0.189016	0.174989
GOTERM_BP_DIRECT	GO:0045345~positive regulation of MHC class I biosynthetic process	5	0.133941	0.0234542	5371, 91662, 4261, 84166, 282618	3590	6	16396	3.80594	1	0.189016	0.174989
GOTERM_BP_DIRECT	GO:0097527~necroptotic signaling pathway	5	0.133941	0.0234542	7098, 355, 356, 7124, 8737	3590	6	16396	3.80594	1	0.189016	0.174989
GOTERM_BP_DIRECT	GO:0007098~centrosome cycle	5	0.133941	0.0234542	672, 51175, 983, 4869, 1647	3590	6	16396	3.80594	1	0.189016	0.174989
GOTERM_BP_DIRECT	GO:0051353~positive regulation of oxidoreductase activity	5	0.133941	0.0234542	25, 27, 64127, 538, 11035	3590	6	16396	3.80594	1	0.189016	0.174989
GOTERM_BP_DIRECT	GO:0045347~negative regulation of MHC class II biosynthetic process	5	0.133941	0.0234542	5196, 3586, 6688, 3066, 220972	3590	6	16396	3.80594	1	0.189016	0.174989
GOTERM_BP_DIRECT	GO:0071035~nuclear polyadenylation-dependent rRNA catabolic process	5	0.133941	0.0234542	5393, 5394, 11340, 23016, 23404	3590	6	16396	3.80594	1	0.189016	0.174989
GOTERM_BP_DIRECT	GO:0060762~regulation of branching involved in mammary gland duct morphogenesis	5	0.133941	0.0234542	2119, 7474, 11331, 7040, 859	3590	6	16396	3.80594	1	0.189016	0.174989
GOTERM_BP_DIRECT	GO:0009744~response to sucrose	5	0.133941	0.0234542	5020, 3992, 2067, 9370, 6529	3590	6	16396	3.80594	1	0.189016	0.174989
GOTERM_BP_DIRECT	GO:0032463~negative regulation of protein homooligomerization	5	0.133941	0.0234542	1366, 53335, 2629, 6714, 1191	3590	6	16396	3.80594	1	0.189016	0.174989
GOTERM_BP_DIRECT	GO:0006207~'de novo' pyrimidine nucleobase biosynthetic process	5	0.133941	0.0234542	1723, 51727, 2475, 1373, 7372	3590	6	16396	3.80594	1	0.189016	0.174989
GOTERM_BP_DIRECT	GO:0032288~myelin assembly	5	0.133941	0.0234542	3611, 64398, 9896, 2817, 200576	3590	6	16396	3.80594	1	0.189016	0.174989
GOTERM_BP_DIRECT	GO:0046632~alpha-beta T cell differentiation	5	0.133941	0.0234542	64919, 25, 301, 51176, 6932	3590	6	16396	3.80594	1	0.189016	0.174989
GOTERM_BP_DIRECT	GO:0016098~monoterpenoid metabolic process	5	0.133941	0.0234542	1557, 1544, 1576, 1565, 1559	3590	6	16396	3.80594	1	0.189016	0.174989
GOTERM_BP_DIRECT	GO:0060137~maternal process involved in parturition	5	0.133941	0.0234542	4838, 1543, 1906, 6347, 1604	3590	6	16396	3.80594	1	0.189016	0.174989
GOTERM_BP_DIRECT	GO:1990000~amyloid fibril formation	5	0.133941	0.0234542	8737, 11035, 948, 2934, 351	3590	6	16396	3.80594	1	0.189016	0.174989
GOTERM_BP_DIRECT	GO:0048341~paraxial mesoderm formation	5	0.133941	0.0234542	6927, 7474, 51176, 2296, 7481	3590	6	16396	3.80594	1	0.189016	0.174989
GOTERM_BP_DIRECT	GO:0060754~positive regulation of mast cell chemotaxis	5	0.133941	0.0234542	7422, 7424, 2277, 7423, 5228	3590	6	16396	3.80594	1	0.189016	0.174989
GOTERM_BP_DIRECT	GO:0034384~high-density lipoprotein particle clearance	5	0.133941	0.0234542	335, 336, 348, 55937, 949	3590	6	16396	3.80594	1	0.189016	0.174989
GOTERM_BP_DIRECT	GO:0002830~positive regulation of type 2 immune response	5	0.133941	0.0234542	972, 3620, 90865, 64127, 114548	3590	6	16396	3.80594	1	0.189016	0.174989
GOTERM_BP_DIRECT	GO:0021984~adenohypophysis development	5	0.133941	0.0234542	3280, 6531, 6657, 2691, 1813	3590	6	16396	3.80594	1	0.189016	0.174989
GOTERM_BP_DIRECT	GO:2001054~negative regulation of mesenchymal cell apoptotic process	5	0.133941	0.0234542	8200, 3091, 6662, 5456, 6899	3590	6	16396	3.80594	1	0.189016	0.174989
GOTERM_BP_DIRECT	GO:2000347~positive regulation of hepatocyte proliferation	5	0.133941	0.0234542	89780, 7494, 3249, 7128, 5469	3590	6	16396	3.80594	1	0.189016	0.174989
GOTERM_BP_DIRECT	GO:2000667~positive regulation of interleukin-13 secretion	5	0.133941	0.0234542	2625, 5047, 23765, 3965, 5590	3590	6	16396	3.80594	1	0.189016	0.174989
GOTERM_BP_DIRECT	GO:0046881~positive regulation of follicle-stimulating hormone secretion	5	0.133941	0.0234542	3624, 3623, 4089, 668, 3952	3590	6	16396	3.80594	1	0.189016	0.174989
GOTERM_BP_DIRECT	GO:0003180~aortic valve morphogenesis	5	0.133941	0.0234542	2625, 1942, 652, 4851, 7291	3590	6	16396	3.80594	1	0.189016	0.174989
GOTERM_BP_DIRECT	GO:0002320~lymphoid progenitor cell differentiation	5	0.133941	0.0234542	3815, 596, 10538, 652, 6688	3590	6	16396	3.80594	1	0.189016	0.174989
GOTERM_BP_DIRECT	GO:0046483~heterocycle metabolic process	5	0.133941	0.0234542	1557, 1544, 1576, 1565, 54658	3590	6	16396	3.80594	1	0.189016	0.174989
GOTERM_BP_DIRECT	GO:0010659~cardiac muscle cell apoptotic process	5	0.133941	0.0234542	6196, 8996, 2782, 3320, 317	3590	6	16396	3.80594	1	0.189016	0.174989
GOTERM_BP_DIRECT	GO:0032494~response to peptidoglycan	5	0.133941	0.0234542	3569, 3663, 728, 11213, 4615	3590	6	16396	3.80594	1	0.189016	0.174989
GOTERM_BP_DIRECT	GO:2001200~positive regulation of dendritic cell differentiation	5	0.133941	0.0234542	177, 3958, 3146, 3965, 3956	3590	6	16396	3.80594	1	0.189016	0.174989
GOTERM_BP_DIRECT	GO:0051346~negative regulation of hydrolase activity	5	0.133941	0.0234542	5104, 4842, 3953, 4846, 5590	3590	6	16396	3.80594	1	0.189016	0.174989
GOTERM_BP_DIRECT	GO:0045591~positive regulation of regulatory T cell differentiation	5	0.133941	0.0234542	3558, 4179, 3135, 10288, 7040	3590	6	16396	3.80594	1	0.189016	0.174989
GOTERM_BP_DIRECT	GO:0060440~trachea formation	5	0.133941	0.0234542	5594, 652, 1499, 5595, 5604	3590	6	16396	3.80594	1	0.189016	0.174989
GOTERM_BP_DIRECT	GO:0034105~positive regulation of tissue remodeling	5	0.133941	0.0234542	3558, 3600, 51561, 59067, 3606	3590	6	16396	3.80594	1	0.189016	0.174989
GOTERM_BP_DIRECT	GO:0030644~cellular chloride ion homeostasis	5	0.133941	0.0234542	6916, 773, 356, 1244, 1152	3590	6	16396	3.80594	1	0.189016	0.174989
GOTERM_BP_DIRECT	GO:0042472~inner ear morphogenesis	19	0.508974	0.0240007	89780, 5076, 6495, 29, 2254, 2263, 2260, 7020, 124590, 2625, 3638, 2624, 55584, 2048, 51761, 613, 55636, 6899, 4920	3590	52	16396	1.66876	1	0.193233	0.178893
GOTERM_MF_DIRECT	GO:0003735~structural constituent of ribosome	60	1.60729	0.0241192	6155, 6232, 6231, 6234, 6159, 6235, 2197, 6191, 6193, 6192, 6194, 55168, 51121, 6227, 6229, 6228, 6122, 6124, 6167, 6203, 6202, 25873, 29957, 1468, 219927, 3921, 56945, 4736, 6132, 6135, 6137, 6576, 6136, 292, 6171, 293, 6173, 7818, 83733, 6204, 6129, 6209, 6208, 5250, 6141, 6144, 6188, 6187, 6143, 6223, 8402, 7311, 6189, 6222, 6224, 7350, 6139, 6138, 6218, 6217	3557	215	16472	1.29234	1	0.282296	0.269161
GOTERM_CC_DIRECT	GO:0005720~nuclear heterochromatin	10	0.267881	0.0244349	3009, 22933, 1788, 3008, 546, 11168, 2296, 115426, 23411, 10155	3662	22	17735	2.20136	1	0.207237	0.189967
GOTERM_CC_DIRECT	GO:0030863~cortical cytoskeleton	10	0.267881	0.0244349	7430, 2039, 2995, 6401, 2035, 6521, 81, 60, 4843, 4627	3662	22	17735	2.20136	1	0.207237	0.189967
GOTERM_BP_DIRECT	GO:0006687~glycosphingolipid metabolic process	17	0.455398	0.0250472	340075, 5476, 7368, 7357, 3073, 581, 1390, 6609, 3815, 410, 2720, 411, 412, 414, 416, 2629, 4758	3590	45	16396	1.72536	1	0.201271	0.186334
GOTERM_BP_DIRECT	GO:0016575~histone deacetylation	17	0.455398	0.0250472	22933, 9734, 5245, 3066, 23411, 3065, 23028, 84525, 79885, 6907, 83933, 51742, 9759, 10013, 9219, 10432, 10014	3590	45	16396	1.72536	1	0.201271	0.186334
GOTERM_BP_DIRECT	GO:0045987~positive regulation of smooth muscle contraction	10	0.267881	0.0254189	100, 146, 2149, 60675, 6865, 1906, 1131, 5743, 6869, 6915	3590	21	16396	2.17482	1	0.203864	0.188735
GOTERM_BP_DIRECT	GO:0033198~response to ATP	10	0.267881	0.0254189	5728, 3329, 444, 3553, 5313, 24145, 5027, 834, 6402, 1791	3590	21	16396	2.17482	1	0.203864	0.188735
GOTERM_BP_DIRECT	GO:0030199~collagen fibril organization	15	0.401822	0.0255839	7373, 7046, 4320, 5345, 2331, 2296, 1281, 7042, 1545, 302, 26585, 4763, 538, 1805, 9509	3590	38	16396	1.80281	1	0.204598	0.189414
GOTERM_BP_DIRECT	GO:0010811~positive regulation of cell-substrate adhesion	15	0.401822	0.0255839	5581, 5212, 10085, 3491, 3717, 246, 79625, 3655, 10551, 4811, 3678, 64094, 3987, 5879, 11117	3590	38	16396	1.80281	1	0.204598	0.189414
GOTERM_BP_DIRECT	GO:0019933~cAMP-mediated signaling	15	0.401822	0.0255839	6662, 9699, 2691, 51083, 7052, 133, 113, 2740, 1672, 108, 8844, 109, 10411, 4724, 196883	3590	38	16396	1.80281	1	0.204598	0.189414
GOTERM_MF_DIRECT	GO:0005184~neuropeptide hormone activity	12	0.321457	0.025585	2922, 551, 7200, 7432, 5443, 7349, 4852, 181, 1392, 4878, 9607, 51083	3557	28	16472	1.98466	1	0.298054	0.284185
GOTERM_BP_DIRECT	GO:0006914~autophagy	40	1.07152	0.0268822	9146, 22933, 9100, 9001, 25, 6794, 8975, 8678, 5861, 5289, 6279, 81876, 310, 3916, 410, 411, 27243, 81631, 7415, 4864, 55823, 738, 10533, 7494, 9474, 8027, 29978, 6280, 7251, 79720, 51652, 120892, 3146, 2475, 7942, 1509, 8878, 27072, 85363, 57617	3590	133	16396	1.37357	1	0.214774	0.198835
GOTERM_MF_DIRECT	GO:0004697~protein kinase C activity	8	0.214305	0.0269773	5580, 5581, 5582, 5583, 5587, 5578, 5579, 5590	3557	15	16472	2.4698	1	0.311363	0.296875
GOTERM_MF_DIRECT	GO:0016712~oxidoreductase activity, acting on paired donors, with incorporation or reduction of molecular oxygen, reduced flavin or flavoprotein as one donor, and incorporation of one atom of oxygen	8	0.214305	0.0269773	1545, 1555, 1588, 1544, 1543, 1576, 1565, 1548	3557	15	16472	2.4698	1	0.311363	0.296875
GOTERM_BP_DIRECT	GO:0045732~positive regulation of protein catabolic process	21	0.56255	0.0272069	22954, 7474, 64321, 6662, 7432, 8742, 5071, 2932, 4905, 1457, 10769, 2931, 1027, 29116, 324, 722, 7415, 10297, 7128, 7879, 10533	3590	60	16396	1.5985	1	0.21716	0.201045
GOTERM_MF_DIRECT	GO:0031492~nucleosomal DNA binding	17	0.455398	0.0273226	8352, 6597, 6598, 126961, 3066, 8091, 440686, 3021, 3065, 8350, 8351, 3183, 1058, 440093, 10473, 60, 9219	3557	46	16472	1.71141	1	0.313848	0.299245
GOTERM_BP_DIRECT	GO:0034976~response to endoplasmic reticulum stress	25	0.669703	0.0273539	25, 7184, 10018, 10956, 57761, 3576, 10211, 10551, 2081, 7494, 5295, 7057, 5034, 1051, 23435, 5071, 9451, 487, 488, 27113, 246, 468, 4217, 1649, 257629	3590	75	16396	1.52238	1	0.217681	0.201526
GOTERM_BP_DIRECT	GO:0001556~oocyte maturation	9	0.241093	0.0274025	891, 6196, 675, 2069, 9985, 9897, 1618, 2185, 283	3590	18	16396	2.28357	1	0.217681	0.201526
GOTERM_BP_DIRECT	GO:0071901~negative regulation of protein serine/threonine kinase activity	9	0.241093	0.0274025	4041, 1028, 3315, 25, 80279, 10519, 29108, 1032, 1030	3590	18	16396	2.28357	1	0.217681	0.201526
GOTERM_BP_DIRECT	GO:0019373~epoxygenase P450 pathway	9	0.241093	0.0274025	1558, 1557, 1545, 1555, 1544, 1543, 2053, 1559, 1548	3590	18	16396	2.28357	1	0.217681	0.201526
GOTERM_BP_DIRECT	GO:0006939~smooth muscle contraction	9	0.241093	0.0274025	4629, 219931, 9475, 1909, 624, 1131, 3363, 6093, 2281	3590	18	16396	2.28357	1	0.217681	0.201526
GOTERM_BP_DIRECT	GO:0007409~axonogenesis	31	0.830431	0.0275585	5063, 8650, 5781, 6794, 2331, 1385, 57463, 63923, 22854, 351, 596, 51761, 10211, 6900, 3996, 1813, 6285, 5076, 7155, 5058, 8301, 2263, 3925, 2932, 1267, 4851, 84894, 4974, 54106, 4218, 2814	3590	98	16396	1.4447	1	0.218711	0.20248
GOTERM_MF_DIRECT	GO:0031994~insulin-like growth factor I binding	7	0.187517	0.0278221	3690, 3685, 3486, 3643, 3484, 3655, 3480	3557	12	16472	2.70134	1	0.313848	0.299245
GOTERM_MF_DIRECT	GO:0001191~transcriptional repressor activity, RNA polymerase II transcription factor binding	7	0.187517	0.0278221	8320, 1387, 84864, 6862, 257101, 23013, 55250	3557	12	16472	2.70134	1	0.313848	0.299245
GOTERM_MF_DIRECT	GO:0043422~protein kinase B binding	7	0.187517	0.0278221	7189, 6430, 55704, 6426, 409, 8915, 5914	3557	12	16472	2.70134	1	0.313848	0.299245
GOTERM_MF_DIRECT	GO:0050321~tau-protein kinase activity	7	0.187517	0.0278221	2932, 2931, 5562, 1453, 2011, 1020, 4139	3557	12	16472	2.70134	1	0.313848	0.299245
GOTERM_BP_DIRECT	GO:0045746~negative regulation of Notch signaling pathway	12	0.321457	0.0281793	2624, 84934, 8650, 54567, 4792, 56892, 8788, 9148, 655, 23462, 4323, 604	3590	28	16396	1.95734	1	0.219947	0.203625
GOTERM_BP_DIRECT	GO:0021983~pituitary gland development	12	0.321457	0.0281793	2624, 652, 2255, 7080, 1385, 999, 6658, 8091, 6657, 9241, 23028, 2736	3590	28	16396	1.95734	1	0.219947	0.203625
GOTERM_BP_DIRECT	GO:0001707~mesoderm formation	12	0.321457	0.0281793	8013, 7296, 2821, 8320, 4087, 4088, 4771, 655, 5566, 659, 9241, 6615	3590	28	16396	1.95734	1	0.219947	0.203625
GOTERM_BP_DIRECT	GO:0043085~positive regulation of catalytic activity	26	0.696491	0.0282542	5663, 5664, 3486, 253260, 2395, 3481, 596, 51582, 2962, 336, 10519, 339, 857, 538, 6647, 84464, 4869, 5476, 10361, 241, 341, 2919, 8439, 113451, 6439, 8837	3590	79	16396	1.50311	1	0.219947	0.203625
GOTERM_BP_DIRECT	GO:0009411~response to UV	16	0.42861	0.0283396	22954, 5371, 84083, 5562, 4221, 5366, 3364, 1032, 1161, 56852, 2966, 5609, 1991, 5599, 5424, 2956	3590	42	16396	1.73986	1	0.219947	0.203625
GOTERM_BP_DIRECT	GO:0036500~ATF6-mediated unfolded protein response	6	0.160729	0.0285054	7494, 22926, 811, 1649, 3309, 7184	3590	9	16396	3.04475	1	0.219947	0.203625
GOTERM_BP_DIRECT	GO:0003208~cardiac ventricle morphogenesis	6	0.160729	0.0285054	3091, 54567, 23462, 4851, 2022, 2626	3590	9	16396	3.04475	1	0.219947	0.203625
GOTERM_BP_DIRECT	GO:1900017~positive regulation of cytokine production involved in inflammatory response	6	0.160729	0.0285054	115362, 112744, 64127, 923, 23765, 3605	3590	9	16396	3.04475	1	0.219947	0.203625
GOTERM_BP_DIRECT	GO:0010838~positive regulation of keratinocyte proliferation	6	0.160729	0.0285054	5068, 3037, 2255, 8626, 2252, 7051	3590	9	16396	3.04475	1	0.219947	0.203625
GOTERM_BP_DIRECT	GO:0035067~negative regulation of histone acetylation	6	0.160729	0.0285054	672, 1487, 6622, 7291, 4204, 50943	3590	9	16396	3.04475	1	0.219947	0.203625
GOTERM_BP_DIRECT	GO:0050764~regulation of phagocytosis	6	0.160729	0.0285054	640, 5582, 6850, 3685, 3055, 949	3590	9	16396	3.04475	1	0.219947	0.203625
GOTERM_BP_DIRECT	GO:0097267~omega-hydroxylase P450 pathway	6	0.160729	0.0285054	1558, 1557, 1545, 1544, 1543, 1559	3590	9	16396	3.04475	1	0.219947	0.203625
GOTERM_BP_DIRECT	GO:0034101~erythrocyte homeostasis	6	0.160729	0.0285054	2821, 3216, 558, 6229, 6218, 3162	3590	9	16396	3.04475	1	0.219947	0.203625
GOTERM_BP_DIRECT	GO:0010873~positive regulation of cholesterol esterification	6	0.160729	0.0285054	341, 335, 336, 348, 183, 185	3590	9	16396	3.04475	1	0.219947	0.203625
GOTERM_BP_DIRECT	GO:0042921~glucocorticoid receptor signaling pathway	6	0.160729	0.0285054	8289, 23054, 10728, 811, 2908, 10432	3590	9	16396	3.04475	1	0.219947	0.203625
GOTERM_BP_DIRECT	GO:0010907~positive regulation of glucose metabolic process	6	0.160729	0.0285054	9104, 5366, 207, 208, 3667, 6714	3590	9	16396	3.04475	1	0.219947	0.203625
GOTERM_BP_DIRECT	GO:0090331~negative regulation of platelet aggregation	6	0.160729	0.0285054	5580, 5592, 634, 114897, 84959, 5270	3590	9	16396	3.04475	1	0.219947	0.203625
GOTERM_BP_DIRECT	GO:0060340~positive regulation of type I interferon-mediated signaling pathway	6	0.160729	0.0285054	3093, 7474, 3661, 84166, 3665, 57506	3590	9	16396	3.04475	1	0.219947	0.203625
GOTERM_BP_DIRECT	GO:0034405~response to fluid shear stress	6	0.160729	0.0285054	1437, 5310, 5027, 5159, 207, 4846	3590	9	16396	3.04475	1	0.219947	0.203625
GOTERM_BP_DIRECT	GO:0010469~regulation of receptor activity	6	0.160729	0.0285054	5580, 5054, 23542, 10013, 5328, 255738	3590	9	16396	3.04475	1	0.219947	0.203625
GOTERM_BP_DIRECT	GO:0008354~germ cell migration	6	0.160729	0.0285054	1525, 3815, 7046, 2296, 3688, 7040	3590	9	16396	3.04475	1	0.219947	0.203625
GOTERM_BP_DIRECT	GO:0007494~midgut development	6	0.160729	0.0285054	6608, 1600, 7474, 1373, 5009, 1956	3590	9	16396	3.04475	1	0.219947	0.203625
GOTERM_BP_DIRECT	GO:1902894~negative regulation of pri-miRNA transcription from RNA polymerase II promoter	6	0.160729	0.0285054	5155, 6662, 5465, 5467, 4776, 11006	3590	9	16396	3.04475	1	0.219947	0.203625
GOTERM_BP_DIRECT	GO:0060452~positive regulation of cardiac muscle contraction	6	0.160729	0.0285054	1113, 7349, 3320, 59272, 1490, 4878	3590	9	16396	3.04475	1	0.219947	0.203625
GOTERM_BP_DIRECT	GO:1904754~positive regulation of vascular associated smooth muscle cell migration	6	0.160729	0.0285054	7494, 5155, 7015, 9732, 183, 4193	3590	9	16396	3.04475	1	0.219947	0.203625
GOTERM_BP_DIRECT	GO:0007599~hemostasis	6	0.160729	0.0285054	7450, 2821, 310, 554, 4778, 64805	3590	9	16396	3.04475	1	0.219947	0.203625
GOTERM_BP_DIRECT	GO:0050665~hydrogen peroxide biosynthetic process	6	0.160729	0.0285054	1536, 50506, 1544, 1543, 6647, 6648	3590	9	16396	3.04475	1	0.219947	0.203625
GOTERM_BP_DIRECT	GO:0070198~protein localization to chromosome, telomeric region	6	0.160729	0.0285054	65057, 7014, 545, 546, 8658, 80351	3590	9	16396	3.04475	1	0.219947	0.203625
GOTERM_BP_DIRECT	GO:0055091~phospholipid homeostasis	6	0.160729	0.0285054	335, 19, 3172, 27329, 9619, 2170	3590	9	16396	3.04475	1	0.219947	0.203625
GOTERM_BP_DIRECT	GO:0070493~thrombin receptor signaling pathway	6	0.160729	0.0285054	2811, 2149, 9002, 5341, 2151, 2150	3590	9	16396	3.04475	1	0.219947	0.203625
GOTERM_BP_DIRECT	GO:0006309~apoptotic DNA fragmentation	8	0.214305	0.0289908	23405, 3837, 1776, 1677, 3005, 3146, 668, 836	3590	15	16396	2.4358	1	0.221846	0.205383
GOTERM_BP_DIRECT	GO:0006691~leukotriene metabolic process	8	0.214305	0.0289908	4051, 2678, 246, 4363, 240, 7097, 9261, 241	3590	15	16396	2.4358	1	0.221846	0.205383
GOTERM_BP_DIRECT	GO:0001953~negative regulation of cell-matrix adhesion	8	0.214305	0.0289908	1029, 5295, 7057, 4771, 4763, 604, 5921, 10631	3590	15	16396	2.4358	1	0.221846	0.205383
GOTERM_BP_DIRECT	GO:0045725~positive regulation of glycogen biosynthetic process	8	0.214305	0.0289908	3479, 5741, 3630, 207, 208, 3643, 3667, 3481	3590	15	16396	2.4358	1	0.221846	0.205383
GOTERM_BP_DIRECT	GO:0010667~negative regulation of cardiac muscle cell apoptotic process	8	0.214305	0.0289908	3717, 23408, 4780, 23409, 8996, 3611, 3297, 3084	3590	15	16396	2.4358	1	0.221846	0.205383
GOTERM_BP_DIRECT	GO:0048255~mRNA stabilization	8	0.214305	0.0289908	2668, 25819, 7432, 8313, 2475, 339, 26986, 1869	3590	15	16396	2.4358	1	0.221846	0.205383
GOTERM_BP_DIRECT	GO:0043122~regulation of I-kappaB kinase/NF-kappaB signaling	8	0.214305	0.0289908	91662, 22900, 3315, 7124, 3553, 8878, 2150, 284	3590	15	16396	2.4358	1	0.221846	0.205383
GOTERM_BP_DIRECT	GO:0042953~lipoprotein transport	8	0.214305	0.0289908	4035, 4036, 338, 339, 5468, 5579, 4547, 948	3590	15	16396	2.4358	1	0.221846	0.205383
GOTERM_BP_DIRECT	GO:0015671~oxygen transport	8	0.214305	0.0289908	4151, 4609, 3039, 3048, 3043, 3042, 114757, 3050	3590	15	16396	2.4358	1	0.221846	0.205383
GOTERM_BP_DIRECT	GO:0045670~regulation of osteoclast differentiation	7	0.187517	0.0296838	4286, 7124, 632, 2475, 814, 1051, 7030	3590	12	16396	2.66416	1	0.223459	0.206876
GOTERM_BP_DIRECT	GO:0019430~removal of superoxide radicals	7	0.187517	0.0296838	7001, 4353, 6647, 538, 1728, 6648, 4846	3590	12	16396	2.66416	1	0.223459	0.206876
GOTERM_BP_DIRECT	GO:0031000~response to caffeine	7	0.187517	0.0296838	1723, 3569, 135, 5562, 5468, 3066, 3065	3590	12	16396	2.66416	1	0.223459	0.206876
GOTERM_BP_DIRECT	GO:0007171~activation of transmembrane receptor protein tyrosine kinase activity	7	0.187517	0.0296838	154, 1950, 26585, 51378, 1946, 284, 3084	3590	12	16396	2.66416	1	0.223459	0.206876
GOTERM_BP_DIRECT	GO:2000505~regulation of energy homeostasis	7	0.187517	0.0296838	8013, 5562, 5563, 28514, 4986, 3953, 948	3590	12	16396	2.66416	1	0.223459	0.206876
GOTERM_BP_DIRECT	GO:0050678~regulation of epithelial cell proliferation	7	0.187517	0.0296838	3280, 1910, 6495, 4088, 5268, 3987, 4070	3590	12	16396	2.66416	1	0.223459	0.206876
GOTERM_BP_DIRECT	GO:0046889~positive regulation of lipid biosynthetic process	7	0.187517	0.0296838	23409, 2475, 348, 1385, 3630, 207, 57406	3590	12	16396	2.66416	1	0.223459	0.206876
GOTERM_BP_DIRECT	GO:0002687~positive regulation of leukocyte migration	7	0.187517	0.0296838	8784, 6355, 7422, 4254, 623, 6403, 3674	3590	12	16396	2.66416	1	0.223459	0.206876
GOTERM_BP_DIRECT	GO:0043248~proteasome assembly	7	0.187517	0.0296838	51371, 5719, 5710, 11047, 5711, 5714, 7979	3590	12	16396	2.66416	1	0.223459	0.206876
GOTERM_BP_DIRECT	GO:0042136~neurotransmitter biosynthetic process	7	0.187517	0.0296838	6582, 5053, 6531, 1103, 4842, 2571, 43	3590	12	16396	2.66416	1	0.223459	0.206876
GOTERM_BP_DIRECT	GO:0001706~endoderm formation	7	0.187517	0.0296838	1844, 1843, 8320, 4087, 64321, 9241, 1846	3590	12	16396	2.66416	1	0.223459	0.206876
GOTERM_BP_DIRECT	GO:0050921~positive regulation of chemotaxis	7	0.187517	0.0296838	2833, 7057, 5155, 6366, 5159, 7040, 2150	3590	12	16396	2.66416	1	0.223459	0.206876
GOTERM_BP_DIRECT	GO:0086004~regulation of cardiac muscle cell contraction	7	0.187517	0.0296838	7341, 3759, 6331, 476, 6781, 6717, 2626	3590	12	16396	2.66416	1	0.223459	0.206876
GOTERM_BP_DIRECT	GO:0090399~replicative senescence	7	0.187517	0.0296838	1029, 7015, 7157, 545, 4311, 80169, 472	3590	12	16396	2.66416	1	0.223459	0.206876
GOTERM_BP_DIRECT	GO:0045667~regulation of osteoblast differentiation	7	0.187517	0.0296838	1655, 5566, 2263, 5747, 64093, 9063, 6591	3590	12	16396	2.66416	1	0.223459	0.206876
GOTERM_BP_DIRECT	GO:0060444~branching involved in mammary gland duct morphogenesis	7	0.187517	0.0296838	5371, 4041, 1435, 6356, 1969, 6714, 10765	3590	12	16396	2.66416	1	0.223459	0.206876
GOTERM_BP_DIRECT	GO:0001759~organ induction	7	0.187517	0.0296838	2668, 652, 6495, 2247, 2246, 2255, 2260	3590	12	16396	2.66416	1	0.223459	0.206876
GOTERM_BP_DIRECT	GO:0040015~negative regulation of multicellular organism growth	7	0.187517	0.0296838	154, 2778, 5641, 2395, 51316, 153, 5727	3590	12	16396	2.66416	1	0.223459	0.206876
GOTERM_CC_DIRECT	GO:0036021~endolysosome lumen	4	0.107152	0.0297224	1514, 1513, 1520, 1508	3662	4	17735	4.84298	1	0.248347	0.227651
GOTERM_CC_DIRECT	GO:0035867~alphav-beta3 integrin-IGF-1-IGF1R complex	4	0.107152	0.0297224	3690, 3479, 3685, 3480	3662	4	17735	4.84298	1	0.248347	0.227651
GOTERM_MF_DIRECT	GO:0016491~oxidoreductase activity	55	1.47335	0.0304614	50507, 9540, 10493, 2194, 6390, 1536, 2108, 231, 1576, 2665, 2664, 8846, 316, 6622, 137872, 4128, 4846, 6241, 7296, 1591, 3295, 1544, 259307, 1543, 644, 2157, 128, 328, 6713, 8630, 6652, 4552, 23028, 5281, 1557, 216, 217, 84188, 51268, 218, 1559, 1757, 3992, 25974, 9131, 1646, 4519, 1645, 1565, 55711, 3028, 501, 5447, 2936, 4835	3557	197	16472	1.29288	1	0.342073	0.326157
GOTERM_BP_DIRECT	GO:0030336~negative regulation of cell migration	30	0.803643	0.0309925	4771, 6376, 286205, 7080, 9241, 4092, 7481, 596, 57522, 4763, 57406, 1813, 5054, 6781, 5796, 9370, 2022, 7070, 2041, 7075, 5728, 1524, 80199, 1545, 684, 104, 6237, 1605, 8519, 3868	3590	95	16396	1.44225	1	0.233101	0.215802
GOTERM_MF_DIRECT	GO:0030971~receptor tyrosine kinase binding	16	0.42861	0.0312027	8661, 5781, 5111, 4485, 7157, 9732, 10140, 8692, 3084, 284, 285, 2621, 2323, 867, 51378, 8878	3557	43	16472	1.72311	1	0.348826	0.332595
GOTERM_CC_DIRECT	GO:0016010~dystrophin-associated glycoprotein complex	8	0.214305	0.0312878	6641, 6443, 3880, 6442, 8910, 859, 1605, 3856	3662	16	17735	2.42149	1	0.259505	0.237879
GOTERM_BP_DIRECT	GO:0006306~DNA methylation	11	0.294669	0.0314032	2778, 1788, 1786, 4297, 2146, 4552, 4255, 546, 2353, 79813, 9219	3590	25	16396	2.00954	1	0.235552	0.218072
GOTERM_BP_DIRECT	GO:0060612~adipose tissue development	11	0.294669	0.0314032	6097, 7494, 4041, 38, 1386, 3398, 10891, 5467, 30812, 3952, 5290	3590	25	16396	2.00954	1	0.235552	0.218072
GOTERM_BP_DIRECT	GO:0048709~oligodendrocyte differentiation	11	0.294669	0.0314032	4915, 54413, 1267, 6662, 4851, 7080, 30812, 1020, 2064, 6426, 3084	3590	25	16396	2.00954	1	0.235552	0.218072
GOTERM_BP_DIRECT	GO:0016236~macroautophagy	25	0.669703	0.0319155	8655, 4077, 5562, 8678, 5563, 5289, 5564, 57521, 81631, 7316, 10013, 10312, 8408, 10533, 9474, 7311, 64422, 55054, 5071, 22863, 1201, 84557, 2475, 9868, 8878	3590	76	16396	1.50235	1	0.23918	0.22143
GOTERM_MF_DIRECT	GO:0070006~metalloaminopeptidase activity	10	0.267881	0.0320841	9520, 2028, 10988, 64167, 4012, 7512, 4323, 290, 51752, 84909	3557	22	16472	2.10494	1	0.35311	0.33668
[truncated: 607 more rows]
