# Supplementary material for: COVID-19 research risks ignoring important host genes due to pre-established research patterns
Source: eLife. 2020 Nov 24;9:e61981. doi: 10.7554/eLife.61981 (PMC7685703; doi:10.7554/eLife.61981)
Supplement: Supplementary file 2. [file elife-61981-supp2.xlsx]

## Sheet: repeated_gwas
symbol_ncbi	dataset	gene_ncbi	tagged in COVID-19 literture
CCHCR1	hospitalized_covid_vs_population	54535	TRUE
CCHCR1	very_severe_respiratory_confirmed_vs_population	54535	TRUE
CCR1	hospitalized_covid_vs_population	1230	TRUE
CCR1	very_severe_respiratory_confirmed_vs_population	1230	TRUE
CCR2	hospitalized_covid_vs_population	729230	TRUE
CCR2	very_severe_respiratory_confirmed_vs_population	729230	TRUE
CCR3	hospitalized_covid_vs_population	1232	FALSE
CCR3	very_severe_respiratory_confirmed_vs_population	1232	FALSE
CCR5	hospitalized_covid_vs_population	1234	TRUE
CCR5	very_severe_respiratory_confirmed_vs_population	1234	TRUE
CCR9	hospitalized_covid_vs_population	10803	TRUE
CCR9	very_severe_respiratory_confirmed_vs_population	10803	TRUE
CXCR6	hospitalized_covid_vs_population	10663	TRUE
CXCR6	very_severe_respiratory_confirmed_vs_population	10663	TRUE
FYCO1	hospitalized_covid_vs_population	79443	FALSE
FYCO1	very_severe_respiratory_confirmed_vs_population	79443	FALSE
IFNAR2	hospitalized_covid_vs_population	3455	TRUE
IFNAR2	very_severe_respiratory_confirmed_vs_population	3455	TRUE
LZTFL1	covid_vs_lab_or_self_reported_negative	54585	FALSE
LZTFL1	hospitalized_covid_vs_population	54585	FALSE
LZTFL1	very_severe_respiratory_confirmed_vs_population	54585	FALSE
OAS1	hospitalized_covid_vs_population	4938	TRUE
OAS1	very_severe_respiratory_confirmed_vs_population	4938	TRUE
OAS2	hospitalized_covid_vs_population	4939	TRUE
OAS2	very_severe_respiratory_confirmed_vs_population	4939	TRUE
OAS3	hospitalized_covid_vs_population	4940	TRUE
OAS3	very_severe_respiratory_confirmed_vs_population	4940	TRUE
SLC6A20	covid_vs_lab_or_self_reported_negative	54716	TRUE
SLC6A20	hospitalized_covid_vs_population	54716	TRUE
TCF19	hospitalized_covid_vs_population	6941	TRUE
TCF19	very_severe_respiratory_confirmed_vs_population	6941	TRUE
XCR1	hospitalized_covid_vs_population	2829	TRUE
XCR1	very_severe_respiratory_confirmed_vs_population	2829	TRUE
