# Supplementary material for: COVID-19 research risks ignoring important host genes due to pre-established research patterns
Source: eLife. 2020 Nov 24;9:e61981. doi: 10.7554/eLife.61981 (PMC7685703; doi:10.7554/eLife.61981)
Supplement: Supplementary file 3. [file elife-61981-supp3.xlsx]

## Sheet: stable_3_multi_hitters
gene_ncbi	symbol_ncbi	CRISPR	GWAS	Aff-MS	RNA-seq	Publications in COVID-19 literature
8704	B4GALT2	0	1	0	1	0
79080	CCDC86	0	0	1	1	1
1230	CCR1	0	1	0	1	14
11190	CEP250	0	0	1	1	1
23177	CEP68	0	0	1	1	0
79745	CLIP4	0	0	1	1	0
23113	CUL9	0	1	0	1	2
55735	DNAJC11	0	0	1	1	1
1786	DNMT1	0	0	1	1	5
440275	EIF2AK4	1	0	0	1	0
9470	EIF4E2	0	0	1	1	0
11340	EXOSC8	0	0	1	1	2
51439	FAM8A1	0	0	1	1	0
79443	FYCO1	0	1	1	0	0
9908	G3BP2	0	1	1	0	1
2671	GFER	0	0	1	1	0
2787	GNG5	0	0	1	1	0
2802	GOLGA3	0	0	1	1	0
25831	HECTD1	0	0	1	1	0
7290	HIRA	1	0	0	1	1
3162	HMOX1	0	0	1	1	17
23028	KDM1A	1	0	0	1	1
8861	LDB1	1	0	0	1	0
4057	LTF	0	1	0	1	2
4240	MFGE8	0	0	1	1	1
10199	MPHOSPH10	0	0	1	1	1
23787	MTCH1	0	0	1	1	0
23077	MYCBP2	0	0	1	1	2
4938	OAS1	0	1	0	1	8
4939	OAS2	0	1	0	1	7
4940	OAS3	0	1	0	1	6
9659	PDE4DIP	0	0	1	1	1
9063	PIAS2	1	0	0	1	1
5352	PLOD2	0	1	1	0	0
10197	PSME3	1	0	0	1	1
4218	RAB8A	0	0	1	1	1
55206	SBNO1	0	0	1	1	0
23381	SMG5	1	0	0	1	0
6487	ST3GAL3	0	1	0	1	0
26519	TIMM10	1	0	1	0	0
26515	TIMM10B	0	0	1	1	0
10844	TUBGCP2	0	0	1	1	0
10426	TUBGCP3	0	0	1	1	0
55757	UGGT2	0	0	1	1	0
55823	VPS11	0	0	1	1	1
23339	VPS39	0	0	1	1	0
29066	ZC3H7A	0	0	1	1	0
24149	ZNF318	0	0	1	1	0
