# Supplementary material for: COVID-19 research risks ignoring important host genes due to pre-established research patterns
Source: eLife. 2020 Nov 24;9:e61981. doi: 10.7554/eLife.61981 (PMC7685703; doi:10.7554/eLife.61981)
Supplement: Supplementary file 4. — Per-gene average share of COVID-19 literature and per-gene average identification rate in genome-wide datasets (one if identified, 0 if not identified). Shown are the ratios of this share and the rates in individual groups (100 first tagged genes, and 20% top-tagged genes) over the share and the rates of the other genes that have been tagged in the COVID-19 literature. [file elife-61981-supp4.xlsx]

## Sheet: enrichments
dataset	first 100 tagged	20% top-tagged
literature	30.9281	36.1194
any genome-wide dataset	1.2931	0.966832
RNA-seq	1.38547	1.03787
Aff-MS	0.712353	0.621806
GWAS	1.73	0.631156
CRISPR	2.13706	0.799465
