# Supplementary material for: COVID-19 research risks ignoring important host genes due to pre-established research patterns
Source: eLife. 2020 Nov 24;9:e61981. doi: 10.7554/eLife.61981 (PMC7685703; doi:10.7554/eLife.61981)
Supplement: Supplementary file 5. [file elife-61981-supp5.xlsx]

## Sheet: labs
genome-wide study	gene_ncbi	symbol_ncbi	pre-COVID19 laboratories	in COVID19 literature
CRISPR	4088	SMAD3	331	tagged
CRISPR	4089	SMAD4	278	tagged
CRISPR	1387	CREBBP	230	tagged
CRISPR	23028	KDM1A	122	tagged
CRISPR	59272	ACE2	119	tagged
CRISPR	8554	PIAS1	82	tagged
CRISPR	8289	ARID1A	81	tagged
CRISPR	1514	CTSL	78	tagged
CRISPR	7187	TRAF3	68	tagged
CRISPR	1859	DYRK1A	64	tagged
CRISPR	7403	KDM6A	49	tagged
CRISPR	10197	PSME3	40	tagged
CRISPR	440275	EIF2AK4	33	ignored
CRISPR	8467	SMARCA5	32	ignored
CRISPR	9063	PIAS2	29	tagged
CRISPR	56946	EMSY	28	ignored
CRISPR	6605	SMARCE1	25	ignored
CRISPR	23210	JMJD6	23	ignored
CRISPR	2186	BPTF	17	ignored
CRISPR	7290	HIRA	15	tagged
CRISPR	8861	LDB1	14	ignored
CRISPR	9320	TRIP12	13	ignored
CRISPR	23429	RYBP	12	ignored
CRISPR	23523	CABIN1	12	tagged
CRISPR	5977	DPF2	11	ignored
CRISPR	2966	GTF2H2	11	tagged
CRISPR	23381	SMG5	10	ignored
CRISPR	55023	PHIP	9	ignored
CRISPR	114882	OSBPL8	7	ignored
CRISPR	26043	UBXN7	6	ignored
CRISPR	26751	SH3YL1	6	tagged
CRISPR	144108	SPTY2D1	4	ignored
CRISPR	57325	KAT14	4	ignored
CRISPR	11325	DDX42	4	ignored
CRISPR	23132	RAD54L2	3	tagged
CRISPR	27158	NDOR1	3	ignored
CRISPR	26519	TIMM10	2	ignored
CRISPR	51367	POP5	2	ignored
CRISPR	58500	ZNF250	1	ignored
CRISPR	56256	SERTAD4	0	ignored
CRISPR	728340	GTF2H2C	0	ignored
GWAS	1234	CCR5	380	tagged
GWAS	861	RUNX1	290	tagged
GWAS	729230	CCR2	202	tagged
GWAS	4684	NCAM1	158	tagged
GWAS	27185	DISC1	127	ignored
GWAS	28	ABO	121	tagged
GWAS	7010	TEK	101	tagged
GWAS	4057	LTF	91	tagged
GWAS	1232	CCR3	48	ignored
GWAS	1230	CCR1	44	tagged
GWAS	4938	OAS1	41	tagged
GWAS	3455	IFNAR2	38	tagged
GWAS	4482	MSRA	36	ignored
GWAS	10803	CCR9	28	tagged
GWAS	10663	CXCR6	28	tagged
GWAS	118429	ANTXR2	22	ignored
GWAS	22937	SCAP	21	tagged
GWAS	54535	CCHCR1	18	tagged
GWAS	4940	OAS3	16	tagged
GWAS	9760	TOX	16	tagged
GWAS	5352	PLOD2	14	ignored
GWAS	202333	CMYA5	14	ignored
GWAS	8994	LIMD1	13	ignored
GWAS	9908	G3BP2	12	tagged
GWAS	4939	OAS2	11	tagged
GWAS	2829	XCR1	11	tagged
GWAS	23113	CUL9	10	tagged
GWAS	6941	TCF19	9	tagged
GWAS	83639	TEX101	7	ignored
GWAS	219578	ZNF804B	7	ignored
GWAS	79443	FYCO1	6	ignored
GWAS	6487	ST3GAL3	6	ignored
GWAS	54716	SLC6A20	6	tagged
GWAS	137868	SGCZ	6	ignored
GWAS	167465	ZNF366	6	ignored
GWAS	11231	SEC63	6	ignored
GWAS	533	ATP6V0B	5	ignored
GWAS	140739	UBE2F	4	ignored
GWAS	54585	LZTFL1	4	ignored
GWAS	66005	CHID1	4	ignored
GWAS	126205	NLRP8	4	ignored
GWAS	100506736	SLFN12L	3	ignored
GWAS	8999	CDKL2	3	ignored
GWAS	57486	NLN	3	ignored
GWAS	445815	PALM2AKAP2	3	ignored
GWAS	8704	B4GALT2	2	ignored
GWAS	1802	DPH2	2	ignored
GWAS	100505385	IQCJ-SCHIP1	2	ignored
GWAS	145508	CEP128	1	ignored
GWAS	133121	ENPP6	0	ignored
GWAS	110806280	CCDC194	0	ignored
GWAS	440533	PSG8	0	ignored
Aff-MS	1312	COMT	931	ignored
Aff-MS	3688	ITGB1	541	tagged
Aff-MS	3162	HMOX1	482	tagged
Aff-MS	387	RHOA	420	tagged
Aff-MS	1786	DNMT1	267	tagged
Aff-MS	3066	HDAC2	235	tagged
Aff-MS	9978	RBX1	184	tagged
Aff-MS	5566	PRKACA	172	tagged
Aff-MS	9518	GDF15	154	tagged
Aff-MS	8737	RIPK1	151	tagged
Aff-MS	2876	GPX1	151	tagged
Aff-MS	2200	FBN1	139	tagged
Aff-MS	5327	PLAT	132	tagged
Aff-MS	949	SCARB1	124	tagged
Aff-MS	29110	TBK1	102	tagged
Aff-MS	3416	IDE	92	tagged
Aff-MS	382	ARF6	91	ignored
Aff-MS	4015	LOX	81	ignored
Aff-MS	26986	PABPC1	77	tagged
Aff-MS	23476	BRD4	68	tagged
Aff-MS	2717	GLA	68	ignored
Aff-MS	1861	TOR1A	63	tagged
Aff-MS	8453	CUL2	61	tagged
Aff-MS	1460	CSNK2B	58	ignored
Aff-MS	6921	ELOC	58	ignored
Aff-MS	57142	RTN4	57	ignored
Aff-MS	5447	POR	55	tagged
Aff-MS	7879	RAB7A	53	tagged
Aff-MS	5962	RDX	52	ignored
Aff-MS	4218	RAB8A	51	tagged
Aff-MS	4928	NUP98	49	tagged
Aff-MS	6923	ELOB	47	ignored
Aff-MS	10146	G3BP1	46	tagged
Aff-MS	10280	SIGMAR1	46	tagged
Aff-MS	5976	UPF1	45	tagged
Aff-MS	10516	FBLN5	45	ignored
Aff-MS	23765	IL17RA	45	tagged
Aff-MS	8754	ADAM9	44	ignored
Aff-MS	55829	SELENOS	42	ignored
Aff-MS	481	ATP1B1	41	tagged
Aff-MS	5318	PKP2	39	ignored
Aff-MS	9510	ADAMTS1	39	ignored
Aff-MS	2677	GGCX	38	ignored
Aff-MS	1291	COL6A1	37	tagged
Aff-MS	2782	GNB1	36	tagged
Aff-MS	5116	PCNT	35	tagged
Aff-MS	5898	RALA	34	ignored
Aff-MS	3615	IMPDH2	33	ignored
Aff-MS	7468	NSD2	33	ignored
Aff-MS	5817	PVR	32	tagged
Aff-MS	10577	NPC2	32	tagged
Aff-MS	8836	GGH	32	tagged
Aff-MS	1173	AP2M1	31	tagged
Aff-MS	7088	TLE1	31	tagged
Aff-MS	4240	MFGE8	31	tagged
Aff-MS	2671	GFER	30	ignored
Aff-MS	2801	GOLGA2	30	ignored
Aff-MS	5861	RAB1A	29	tagged
Aff-MS	10142	AKAP9	28	ignored
Aff-MS	8021	NUP214	28	tagged
Aff-MS	1063	CENPF	27	tagged
Aff-MS	26058	GIGYF2	27	ignored
Aff-MS	4758	NEU1	27	tagged
Aff-MS	34	ACADM	24	tagged
Aff-MS	9188	DDX21	24	tagged
Aff-MS	23636	NUP62	24	tagged
Aff-MS	8614	STC2	24	ignored
Aff-MS	6046	BRD2	23	tagged
Aff-MS	1459	CSNK2A2	23	tagged
Aff-MS	5577	PRKAR2B	23	ignored
Aff-MS	23408	SIRT5	23	tagged
Aff-MS	10193	RNF41	23	ignored
Aff-MS	10956	OS9	23	tagged
Aff-MS	2201	FBN2	22	tagged
Aff-MS	5714	PSMD8	20	tagged
Aff-MS	57534	MIB1	20	tagged
Aff-MS	23111	SPART	20	ignored
Aff-MS	8761	PABPC4	19	ignored
Aff-MS	23077	MYCBP2	19	tagged
Aff-MS	5576	PRKAR2A	19	ignored
Aff-MS	55755	CDK5RAP2	19	tagged
Aff-MS	10890	RAB10	19	ignored
Aff-MS	8546	AP3B1	18	tagged
Aff-MS	6938	TCF12	18	ignored
Aff-MS	5046	PCSK6	18	tagged
Aff-MS	4343	MOV10	17	ignored
Aff-MS	60681	FKBP10	17	ignored
Aff-MS	51199	NIN	16	tagged
Aff-MS	11190	CEP250	16	tagged
Aff-MS	51552	RAB14	16	ignored
Aff-MS	26574	AATF	16	tagged
Aff-MS	10238	DCAF7	16	tagged
Aff-MS	8480	RAE1	16	tagged
Aff-MS	10525	HYOU1	16	ignored
Aff-MS	5422	POLA1	15	tagged
Aff-MS	27430	MAT2B	15	ignored
Aff-MS	23339	VPS39	15	ignored
Aff-MS	25777	SUN2	15	ignored
Aff-MS	2040	STOM	14	tagged
Aff-MS	161	AP2A2	14	ignored
Aff-MS	7090	TLE3	14	ignored
Aff-MS	23085	ERC1	14	ignored
Aff-MS	2181	ACSL3	14	ignored
Aff-MS	1727	CYB5R3	14	ignored
Aff-MS	22931	RAB18	14	tagged
Aff-MS	5538	PPT1	14	ignored
Aff-MS	5352	PLOD2	14	ignored
Aff-MS	23367	LARP1	13	tagged
Aff-MS	11113	CIT	13	ignored
Aff-MS	11116	CEP43	13	ignored
Aff-MS	2804	GOLGB1	13	tagged
Aff-MS	51010	EXOSC3	13	ignored
Aff-MS	55823	VPS11	13	tagged
Aff-MS	9908	G3BP2	12	tagged
Aff-MS	166	TLE5	12	tagged
Aff-MS	9470	EIF4E2	12	ignored
Aff-MS	5862	RAB2A	12	tagged
Aff-MS	4927	NUP88	12	ignored
Aff-MS	23071	ERP44	12	ignored
Aff-MS	64374	SIL1	12	ignored
Aff-MS	57153	SLC44A2	11	ignored
Aff-MS	8975	USP13	11	tagged
Aff-MS	26092	TOR1AIP1	11	ignored
Aff-MS	56915	EXOSC5	11	ignored
Aff-MS	91754	NEK9	11	ignored
Aff-MS	23646	PLD3	11	ignored
Aff-MS	64093	SMOC1	11	tagged
Aff-MS	79753	SNIP1	10	ignored
Aff-MS	5558	PRIM2	10	ignored
Aff-MS	64784	CRTC3	10	tagged
Aff-MS	10204	NUTF2	10	tagged
Aff-MS	5910	RAP1GDS1	10	ignored
Aff-MS	10960	LMAN2	10	ignored
Aff-MS	80142	PTGES2	10	ignored
Aff-MS	51574	LARP7	10	tagged
Aff-MS	523	ATP6V1A	9	tagged
Aff-MS	10270	AKAP8	9	ignored
Aff-MS	9755	TBKBP1	9	tagged
Aff-MS	9659	PDE4DIP	9	tagged
Aff-MS	201134	CEP112	9	ignored
Aff-MS	11001	SLC27A2	9	tagged
Aff-MS	8540	AGPS	9	tagged
Aff-MS	64757	MTARC1	9	ignored
Aff-MS	51091	SEPSECS	9	ignored
Aff-MS	7458	EIF4H	9	ignored
Aff-MS	27248	ERLEC1	9	ignored
Aff-MS	196527	ANO6	8	ignored
Aff-MS	9662	CEP135	8	ignored
Aff-MS	23177	CEP68	8	ignored
Aff-MS	64689	GORASP1	8	tagged
Aff-MS	5878	RAB5C	8	tagged
Aff-MS	6731	SRP72	8	ignored
Aff-MS	25831	HECTD1	8	ignored
Aff-MS	2108	ETFA	7	tagged
Aff-MS	10531	PITRM1	7	ignored
Aff-MS	26993	AKAP8L	7	ignored
Aff-MS	9898	UBAP2L	7	ignored
Aff-MS	2802	GOLGA3	7	ignored
Aff-MS	152789	JAKMIP1	7	ignored
Aff-MS	80777	CYB5B	7	ignored
Aff-MS	91942	NDUFAF2	7	ignored
Aff-MS	11340	EXOSC8	7	tagged
Aff-MS	55027	HEATR3	7	ignored
Aff-MS	83729	INHBE	7	ignored
Aff-MS	56605	ERO1B	7	ignored
Aff-MS	55768	NGLY1	7	ignored
Aff-MS	54850	FBXL12	7	ignored
Aff-MS	148867	SLC30A7	6	ignored
Aff-MS	10844	TUBGCP2	6	ignored
Aff-MS	55131	RBM28	6	ignored
Aff-MS	5557	PRIM1	6	tagged
Aff-MS	79443	FYCO1	6	ignored
Aff-MS	22981	NINL	6	ignored
Aff-MS	23325	WASHC4	6	ignored
Aff-MS	23307	FKBP15	6	ignored
Aff-MS	55735	DNAJC11	6	tagged
Aff-MS	6728	SRP19	6	ignored
Aff-MS	23404	EXOSC2	6	tagged
Aff-MS	2963	GTF2F2	6	tagged
Aff-MS	4884	NPTX1	6	ignored
Aff-MS	23509	POFUT1	6	tagged
Aff-MS	7905	REEP5	5	tagged
Aff-MS	10426	TUBGCP3	5	ignored
Aff-MS	25921	ZDHHC5	5	tagged
Aff-MS	10569	SLU7	5	tagged
Aff-MS	9857	CEP350	5	ignored
Aff-MS	9648	GCC2	5	ignored
Aff-MS	2787	GNG5	5	ignored
Aff-MS	11101	ATE1	5	ignored
Aff-MS	23107	MRPS27	5	ignored
Aff-MS	79586	CHPF	5	ignored
Aff-MS	79666	PLEKHF2	5	ignored
Aff-MS	10897	YIF1A	4	ignored
Aff-MS	25873	RPL36	4	tagged
Aff-MS	79709	COLGALT1	4	ignored
Aff-MS	55206	SBNO1	4	ignored
Aff-MS	11064	CNTRL	4	tagged
Aff-MS	440138	ALG11	4	ignored
Aff-MS	23225	NUP210	4	ignored
Aff-MS	26355	FAM162A	4	ignored
Aff-MS	131118	DNAJC19	4	tagged
Aff-MS	25983	NGDN	4	ignored
Aff-MS	51116	MRPS2	4	ignored
Aff-MS	23787	MTCH1	4	ignored
Aff-MS	23195	MDN1	4	tagged
Aff-MS	80267	EDEM3	4	ignored
Aff-MS	10283	CWC27	3	ignored
Aff-MS	9512	PMPCB	3	ignored
Aff-MS	10463	SLC30A9	3	ignored
Aff-MS	60493	FASTKD5	3	ignored
Aff-MS	79934	COQ8B	3	ignored
Aff-MS	92105	INTS4	3	ignored
Aff-MS	10157	AASS	3	ignored
Aff-MS	23649	POLA2	3	ignored
Aff-MS	57222	ERGIC1	3	ignored
Aff-MS	24149	ZNF318	3	ignored
Aff-MS	23185	LARP4B	3	tagged
Aff-MS	54477	PLEKHA5	3	ignored
Aff-MS	3281	HSBP1	3	tagged
Aff-MS	56850	GRIPAP1	3	ignored
Aff-MS	51361	HOOK1	3	ignored
Aff-MS	6729	SRP54	3	ignored
Aff-MS	64432	MRPS25	3	ignored
Aff-MS	56257	MEPCE	3	tagged
Aff-MS	79080	CCDC86	3	tagged
Aff-MS	64969	MRPS5	3	ignored
Aff-MS	53371	NUP54	3	ignored
Aff-MS	23155	CLCC1	3	ignored
Aff-MS	80020	FOXRED2	3	ignored
Aff-MS	90161	HS6ST2	3	ignored
Aff-MS	6388	SDF2	3	ignored
Aff-MS	23203	PMPCA	2	ignored
Aff-MS	113174	SAAL1	2	ignored
Aff-MS	80222	TARS2	2	ignored
Aff-MS	28969	BZW2	2	ignored
Aff-MS	9136	RRP9	2	tagged
Aff-MS	25940	FAM98A	2	ignored
Aff-MS	80273	GRPEL1	2	ignored
Aff-MS	10295	BCKDK	2	ignored
Aff-MS	219743	TYSND1	2	ignored
Aff-MS	51248	PDZD11	2	ignored
Aff-MS	84726	PRRC2B	2	ignored
Aff-MS	55833	UBAP2	2	ignored
Aff-MS	26519	TIMM10	2	ignored
Aff-MS	26520	TIMM9	2	ignored
Aff-MS	10632	ATP5MG	2	ignored
Aff-MS	169714	QSOX2	2	ignored
Aff-MS	9653	HS2ST1	2	ignored
Aff-MS	79877	DCAKD	2	ignored
Aff-MS	1662	DDX10	2	ignored
Aff-MS	79731	NARS2	2	ignored
Aff-MS	84858	ZNF503	2	ignored
Aff-MS	55700	MAP7D1	2	ignored
Aff-MS	26521	TIMM8B	2	ignored
Aff-MS	286827	TRIM59	2	ignored
Aff-MS	23065	EMC1	2	ignored
Aff-MS	80213	TM2D3	2	ignored
Aff-MS	55757	UGGT2	2	ignored
Aff-MS	54480	CHPF2	2	ignored
Aff-MS	124245	ZC3H18	1	ignored
Aff-MS	92840	REEP6	1	ignored
Aff-MS	89874	SLC25A21	1	ignored
Aff-MS	51439	FAM8A1	1	ignored
Aff-MS	25980	AAR2	1	ignored
Aff-MS	51125	GOLGA7	1	tagged
Aff-MS	159195	USP54	1	ignored
Aff-MS	29066	ZC3H7A	1	ignored
Aff-MS	55285	RBM41	1	ignored
Aff-MS	53938	PPIL3	1	ignored
Aff-MS	145282	MIPOL1	1	ignored
Aff-MS	79571	GCC1	1	ignored
Aff-MS	55621	TRMT1	1	tagged
Aff-MS	537	ATP6AP1	1	ignored
Aff-MS	79572	ATP13A3	1	ignored
Aff-MS	7841	MOGS	1	ignored
Aff-MS	10199	MPHOSPH10	1	tagged
Aff-MS	79954	NOL10	1	ignored
Aff-MS	9818	NUP58	1	ignored
Aff-MS	79178	THTPA	1	ignored
Aff-MS	79699	ZYG11B	1	ignored
Aff-MS	151188	ARL6IP6	1	ignored
Aff-MS	284106	CISD3	1	ignored
Aff-MS	51661	FKBP7	1	tagged
Aff-MS	79745	CLIP4	0	ignored
Aff-MS	79078	C1orf50	0	ignored
Aff-MS	90580	TIMM29	0	ignored
Aff-MS	26515	TIMM10B	0	ignored
Aff-MS	51097	SCCPDH	0	ignored
Aff-MS	57106	NAT14	0	ignored
Aff-MS	29880	ALG5	0	ignored
Aff-MS	79070	POGLUT2	0	ignored
Aff-MS	143888	POGLUT3	0	ignored
Aff-MS	126789	PUSL1	0	ignored
RNA-seq	7124	TNF	2715	tagged
RNA-seq	4524	MTHFR	1583	tagged
RNA-seq	6532	SLC6A4	1065	tagged
RNA-seq	4609	MYC	909	tagged
RNA-seq	3106	HLA-B	767	tagged
RNA-seq	6347	CCL2	695	tagged
RNA-seq	23411	SIRT1	543	tagged
RNA-seq	3105	HLA-A	538	tagged
RNA-seq	3725	JUN	497	tagged
RNA-seq	3162	HMOX1	482	tagged
RNA-seq	7316	UBC	479	tagged
RNA-seq	3557	IL1RN	462	tagged
RNA-seq	3690	ITGB3	455	tagged
RNA-seq	4312	MMP1	448	tagged
RNA-seq	1543	CYP1A1	444	tagged
RNA-seq	2153	F5	442	tagged
RNA-seq	4292	MLH1	438	tagged
RNA-seq	3552	IL1A	435	tagged
RNA-seq	8743	TNFSF10	386	tagged
RNA-seq	120892	LRRK2	384	tagged
RNA-seq	3107	HLA-C	373	tagged
RNA-seq	1577	CYP3A5	347	ignored
RNA-seq	6772	STAT1	336	tagged
RNA-seq	1588	CYP19A1	335	tagged
RNA-seq	324	APC	327	tagged
RNA-seq	3934	LCN2	326	tagged
RNA-seq	598	BCL2L1	309	tagged
RNA-seq	7450	VWF	293	tagged
RNA-seq	3627	CXCL10	287	tagged
RNA-seq	7428	VHL	285	ignored
RNA-seq	10135	NAMPT	278	ignored
RNA-seq	4000	LMNA	273	tagged
RNA-seq	1786	DNMT1	267	tagged
RNA-seq	5465	PPARA	257	tagged
RNA-seq	5663	PSEN1	254	tagged
RNA-seq	7048	TGFBR2	245	ignored
RNA-seq	2034	EPAS1	232	tagged
RNA-seq	2212	FCGR2A	228	tagged
RNA-seq	2260	FGFR1	227	tagged
RNA-seq	7430	EZR	225	tagged
RNA-seq	6615	SNAI1	224	tagged
RNA-seq	5265	SERPINA1	222	tagged
RNA-seq	11186	RASSF1	220	ignored
RNA-seq	4204	MECP2	216	tagged
RNA-seq	7046	TGFBR1	215	tagged
RNA-seq	3312	HSPA8	213	ignored
RNA-seq	57817	HAMP	213	tagged
RNA-seq	1958	EGR1	210	tagged
RNA-seq	2022	ENG	210	tagged
RNA-seq	5371	PML	207	tagged
RNA-seq	10673	TNFSF13B	206	tagged
RNA-seq	4683	NBN	203	tagged
RNA-seq	3600	IL15	200	tagged
RNA-seq	3039	HBA1	197	tagged
RNA-seq	7153	TOP2A	194	tagged
RNA-seq	1019	CDK4	191	tagged
RNA-seq	1116	CHI3L1	187	tagged
RNA-seq	5950	RBP4	187	ignored
RNA-seq	6280	S100A9	185	tagged
RNA-seq	2214	FCGR3A	182	tagged
RNA-seq	8841	HDAC3	181	tagged
RNA-seq	23586	DDX58	179	tagged
RNA-seq	3620	IDO1	178	tagged
RNA-seq	51284	TLR7	178	tagged
RNA-seq	613	BCR	176	tagged
RNA-seq	1244	ABCC2	173	tagged
RNA-seq	10273	STUB1	170	ignored
RNA-seq	8837	CFLAR	166	tagged
RNA-seq	2547	XRCC6	164	ignored
RNA-seq	7508	XPC	163	ignored
RNA-seq	8517	IKBKG	163	tagged
RNA-seq	5058	PAK1	160	tagged
RNA-seq	135	ADORA2A	157	tagged
RNA-seq	7351	UCP2	155	ignored
RNA-seq	3240	HP	155	tagged
RNA-seq	4092	SMAD7	153	tagged
RNA-seq	2353	FOS	152	tagged
RNA-seq	1000	CDH2	151	tagged
RNA-seq	7186	TRAF2	147	ignored
RNA-seq	5228	PGF	145	tagged
RNA-seq	820	CAMP	144	tagged
RNA-seq	7534	YWHAZ	143	ignored
RNA-seq	3418	IDH2	137	tagged
RNA-seq	6279	S100A8	136	tagged
RNA-seq	811	CALR	134	tagged
RNA-seq	1410	CRYAB	133	ignored
RNA-seq	6775	STAT4	133	tagged
RNA-seq	409	ARRB2	131	tagged
RNA-seq	775	CACNA1C	128	ignored
RNA-seq	84876	ORAI1	126	ignored
RNA-seq	1536	CYBB	126	tagged
RNA-seq	7078	TIMP3	125	tagged
RNA-seq	23028	KDM1A	122	tagged
RNA-seq	3611	ILK	122	tagged
RNA-seq	2539	G6PD	122	tagged
RNA-seq	4853	NOTCH2	121	ignored
RNA-seq	358	AQP1	121	ignored
RNA-seq	64135	IFIH1	120	tagged
RNA-seq	60	ACTB	120	tagged
RNA-seq	4973	OLR1	117	tagged
RNA-seq	5590	PRKCZ	114	tagged
RNA-seq	10763	NES	114	tagged
RNA-seq	468	ATF4	114	tagged
RNA-seq	246778	IL27	113	tagged
RNA-seq	55054	ATG16L1	113	tagged
RNA-seq	182	JAG1	111	tagged
RNA-seq	6598	SMARCB1	111	tagged
RNA-seq	4771	NF2	111	tagged
RNA-seq	10392	NOD1	111	ignored
RNA-seq	6288	SAA1	108	tagged
RNA-seq	4067	LYN	108	tagged
RNA-seq	952	CD38	107	tagged
RNA-seq	54790	TET2	107	tagged
RNA-seq	5610	EIF2AK2	106	tagged
RNA-seq	7096	TLR1	106	tagged
RNA-seq	540	ATP7B	105	ignored
RNA-seq	10524	KAT5	103	tagged
RNA-seq	1642	DDB1	102	ignored
RNA-seq	8877	SPHK1	102	ignored
RNA-seq	1915	EEF1A1	102	tagged
RNA-seq	1072	CFL1	101	ignored
RNA-seq	2185	PTK2B	101	tagged
RNA-seq	5829	PXN	100	ignored
RNA-seq	7531	YWHAE	100	ignored
RNA-seq	150	ADRA2A	99	ignored
RNA-seq	249	ALPL	97	ignored
RNA-seq	4830	NME1	97	ignored
RNA-seq	5978	REST	97	ignored
RNA-seq	6446	SGK1	97	tagged
RNA-seq	408	ARRB1	96	tagged
RNA-seq	10664	CTCF	96	ignored
RNA-seq	4086	SMAD1	96	ignored
RNA-seq	1909	EDNRA	95	tagged
RNA-seq	1378	CR1	94	tagged
RNA-seq	10397	NDRG1	94	ignored
RNA-seq	6402	SELL	93	tagged
RNA-seq	8826	IQGAP1	93	ignored
RNA-seq	2810	SFN	92	ignored
RNA-seq	6817	SULT1A1	92	tagged
RNA-seq	8314	BAP1	92	ignored
RNA-seq	7113	TMPRSS2	91	tagged
RNA-seq	4057	LTF	91	tagged
RNA-seq	2624	GATA2	91	tagged
RNA-seq	629	CFB	91	tagged
RNA-seq	634	CEACAM1	90	tagged
RNA-seq	4773	NFATC2	90	ignored
RNA-seq	6688	SPI1	89	tagged
RNA-seq	4317	MMP8	88	tagged
RNA-seq	3753	KCNE1	88	tagged
RNA-seq	1843	DUSP1	88	tagged
RNA-seq	3164	NR4A1	86	tagged
RNA-seq	5564	PRKAB1	86	tagged
RNA-seq	6356	CCL11	86	tagged
RNA-seq	5335	PLCG1	85	ignored
RNA-seq	7248	TSC1	85	tagged
RNA-seq	7068	THRB	84	ignored
RNA-seq	6348	CCL3	83	tagged
RNA-seq	773	CACNA1A	83	tagged
RNA-seq	7225	TRPC6	81	ignored
RNA-seq	4162	MCAM	81	tagged
RNA-seq	5981	RFC1	81	ignored
RNA-seq	2931	GSK3A	80	tagged
RNA-seq	1604	CD55	79	tagged
RNA-seq	241	ALOX5AP	78	tagged
RNA-seq	58191	CXCL16	78	tagged
RNA-seq	3276	PRMT1	78	ignored
RNA-seq	2643	GCH1	77	ignored
RNA-seq	54210	TREM1	77	tagged
RNA-seq	546	ATRX	77	tagged
RNA-seq	2215	FCGR3B	76	tagged
RNA-seq	4855	NOTCH4	76	ignored
RNA-seq	8989	TRPA1	76	ignored
RNA-seq	1655	DDX5	75	tagged
RNA-seq	2246	FGF1	75	tagged
RNA-seq	1647	GADD45A	74	tagged
RNA-seq	3732	CD82	74	tagged
RNA-seq	3040	HBA2	74	ignored
RNA-seq	4599	MX1	74	tagged
RNA-seq	1981	EIF4G1	74	ignored
RNA-seq	7846	TUBA1A	73	ignored
RNA-seq	6908	TBP	73	tagged
RNA-seq	9531	BAG3	72	ignored
RNA-seq	8863	PER3	71	ignored
RNA-seq	51196	PLCE1	71	ignored
RNA-seq	10411	RAPGEF3	70	tagged
RNA-seq	8434	RECK	70	ignored
RNA-seq	1520	CTSS	69	tagged
RNA-seq	5710	PSMD4	69	tagged
RNA-seq	840	CASP7	69	ignored
RNA-seq	389	RHOC	68	tagged
RNA-seq	3965	LGALS9	68	tagged
RNA-seq	3665	IRF7	67	tagged
RNA-seq	2621	GAS6	67	tagged
RNA-seq	3759	KCNJ2	67	tagged
RNA-seq	7408	VASP	67	ignored
RNA-seq	6548	SLC9A1	66	tagged
RNA-seq	476	ATP1A1	66	tagged
RNA-seq	1282	COL4A1	66	ignored
RNA-seq	9636	ISG15	65	tagged
RNA-seq	5187	PER1	65	ignored
RNA-seq	997	CDC34	65	ignored
RNA-seq	9656	MDC1	65	ignored
RNA-seq	27122	DKK3	64	tagged
RNA-seq	3718	JAK3	64	tagged
RNA-seq	7439	BEST1	63	ignored
RNA-seq	57447	NDRG2	63	ignored
RNA-seq	3704	ITPA	63	tagged
RNA-seq	4176	MCM7	63	ignored
RNA-seq	7454	WAS	63	ignored
RNA-seq	11140	CDC37	62	ignored
RNA-seq	274	BIN1	62	ignored
RNA-seq	23643	LY96	62	tagged
RNA-seq	2050	EPHB4	61	ignored
RNA-seq	2209	FCGR1A	60	tagged
RNA-seq	1118	CHIT1	60	tagged
RNA-seq	3398	ID2	60	tagged
RNA-seq	6654	SOS1	60	tagged
RNA-seq	90	ACVR1	60	ignored
RNA-seq	3708	ITPR1	60	ignored
RNA-seq	11091	WDR5	60	ignored
RNA-seq	1742	DLG4	59	ignored
RNA-seq	2	A2M	58	tagged
RNA-seq	972	CD74	58	tagged
RNA-seq	6283	S100A12	57	tagged
RNA-seq	1660	DHX9	57	tagged
RNA-seq	5216	PFN1	57	tagged
RNA-seq	8313	AXIN2	56	tagged
RNA-seq	728	C5AR1	54	tagged
RNA-seq	1643	DDB2	53	ignored
RNA-seq	5074	PAWR	53	ignored
RNA-seq	171023	ASXL1	53	tagged
RNA-seq	5999	RGS4	52	ignored
RNA-seq	6351	CCL4	52	tagged
RNA-seq	4218	RAB8A	51	tagged
RNA-seq	23385	NCSTN	51	ignored
RNA-seq	653509	SFTPA1	51	tagged
RNA-seq	8874	ARHGEF7	51	ignored
RNA-seq	7182	NR2C2	51	ignored
RNA-seq	3921	RPSA	51	tagged
RNA-seq	6037	RNASE3	50	tagged
RNA-seq	6362	CCL18	50	tagged
RNA-seq	925	CD8A	50	tagged
RNA-seq	2495	FTH1	49	ignored
RNA-seq	3183	HNRNPC	49	tagged
RNA-seq	22861	NLRP1	49	tagged
RNA-seq	4211	MEIS1	49	ignored
RNA-seq	56999	ADAMTS9	49	ignored
RNA-seq	4001	LMNB1	49	ignored
RNA-seq	64581	CLEC7A	48	tagged
RNA-seq	2358	FPR2	48	tagged
RNA-seq	9075	CLDN2	48	ignored
RNA-seq	6737	TRIM21	47	tagged
RNA-seq	85363	TRIM5	47	tagged
RNA-seq	8932	MBD2	47	ignored
RNA-seq	3726	JUNB	47	tagged
RNA-seq	10211	FLOT1	47	tagged
RNA-seq	978	CDA	46	tagged
RNA-seq	8924	HERC2	46	ignored
RNA-seq	602	BCL3	46	tagged
RNA-seq	9217	VAPB	46	ignored
RNA-seq	4005	LMO2	45	tagged
RNA-seq	4926	NUMA1	45	ignored
RNA-seq	11337	GABARAP	45	ignored
RNA-seq	6773	STAT2	44	tagged
RNA-seq	267	AMFR	44	ignored
RNA-seq	1230	CCR1	44	tagged
RNA-seq	6286	S100P	44	tagged
RNA-seq	26523	AGO1	43	ignored
RNA-seq	4680	CEACAM6	43	tagged
RNA-seq	7122	CLDN5	43	tagged
RNA-seq	5708	PSMD2	43	tagged
RNA-seq	8764	TNFRSF14	42	tagged
RNA-seq	1959	EGR2	42	ignored
RNA-seq	1108	CHD4	42	ignored
RNA-seq	23186	RCOR1	42	ignored
RNA-seq	2357	FPR1	42	tagged
RNA-seq	10288	LILRB2	42	tagged
RNA-seq	28514	DLL1	42	tagged
RNA-seq	6424	SFRP4	42	ignored
RNA-seq	6781	STC1	42	tagged
RNA-seq	10401	PIAS3	41	ignored
RNA-seq	9126	SMC3	41	ignored
RNA-seq	4938	OAS1	41	tagged
RNA-seq	8661	EIF3A	40	tagged
RNA-seq	10197	PSME3	40	tagged
RNA-seq	1453	CSNK1D	40	tagged
RNA-seq	6478	SIAH2	40	ignored
RNA-seq	3127	HLA-DRB5	40	ignored
RNA-seq	3399	ID3	39	ignored
RNA-seq	5142	PDE4B	39	ignored
RNA-seq	55743	CHFR	39	ignored
RNA-seq	5608	MAP2K6	39	tagged
RNA-seq	3727	JUND	39	tagged
RNA-seq	6590	SLPI	39	tagged
RNA-seq	8295	TRRAP	39	ignored
RNA-seq	6363	CCL19	39	ignored
RNA-seq	153090	DAB2IP	39	ignored
RNA-seq	79813	EHMT1	39	tagged
RNA-seq	1855	DVL1	38	ignored
RNA-seq	1408	CRY2	38	ignored
RNA-seq	6188	RPS3	38	tagged
RNA-seq	5426	POLE	38	ignored
RNA-seq	55072	RNF31	38	ignored
RNA-seq	3306	HSPA2	38	ignored
RNA-seq	366	AQP9	38	tagged
RNA-seq	1464	CSPG4	38	ignored
RNA-seq	7177	TPSAB1	38	ignored
RNA-seq	26354	GNL3	38	ignored
RNA-seq	6440	SFTPC	38	tagged
RNA-seq	968	CD68	37	tagged
RNA-seq	1938	EEF2	37	ignored
RNA-seq	8740	TNFSF14	37	tagged
RNA-seq	26018	LRIG1	37	ignored
RNA-seq	3937	LCP2	37	ignored
RNA-seq	5420	PODXL	37	tagged
RNA-seq	57016	AKR1B10	37	ignored
RNA-seq	1755	DMBT1	36	tagged
RNA-seq	10410	IFITM3	36	tagged
RNA-seq	5702	PSMC3	36	ignored
RNA-seq	54739	XAF1	36	tagged
RNA-seq	1827	RCAN1	36	ignored
RNA-seq	5783	PTPN13	36	ignored
RNA-seq	1163	CKS1B	35	ignored
RNA-seq	1200	TPP1	35	ignored
RNA-seq	384	ARG2	35	ignored
RNA-seq	597	BCL2A1	35	tagged
RNA-seq	5609	MAP2K7	35	tagged
RNA-seq	9002	F2RL3	35	tagged
RNA-seq	55851	PSENEN	35	ignored
RNA-seq	390	RND3	35	ignored
RNA-seq	8726	EED	34	ignored
RNA-seq	6895	TARBP2	34	ignored
RNA-seq	6175	RPLP0	34	ignored
RNA-seq	3055	HCK	34	tagged
RNA-seq	5880	RAC2	34	tagged
RNA-seq	2768	GNA12	34	ignored
RNA-seq	9447	AIM2	33	tagged
RNA-seq	440275	EIF2AK4	33	ignored
RNA-seq	8535	CBX4	33	tagged
RNA-seq	8553	BHLHE40	33	ignored
RNA-seq	10769	PLK2	33	tagged
RNA-seq	23081	KDM4C	33	ignored
RNA-seq	1441	CSF3R	32	tagged
RNA-seq	9958	USP15	32	ignored
RNA-seq	27040	LAT	32	tagged
RNA-seq	23239	PHLPP1	32	ignored
RNA-seq	165918	RNF168	32	ignored
RNA-seq	23345	SYNE1	32	tagged
RNA-seq	6872	TAF1	32	tagged
RNA-seq	4240	MFGE8	31	tagged
RNA-seq	5867	RAB4A	31	ignored
RNA-seq	9294	S1PR2	31	ignored
RNA-seq	7327	UBE2G2	31	ignored
RNA-seq	2318	FLNC	31	ignored
RNA-seq	54880	BCOR	31	ignored
RNA-seq	3561	IL2RG	31	tagged
RNA-seq	2671	GFER	30	ignored
RNA-seq	8322	FZD4	30	ignored
RNA-seq	11213	IRAK3	30	tagged
RNA-seq	4650	MYO9B	30	ignored
RNA-seq	5740	PTGIS	30	ignored
RNA-seq	200315	APOBEC3A	30	tagged
RNA-seq	4082	MARCKS	30	tagged
RNA-seq	23452	ANGPTL2	30	ignored
RNA-seq	837	CASP4	29	ignored
RNA-seq	9063	PIAS2	29	tagged
RNA-seq	10578	GNLY	29	tagged
RNA-seq	309	ANXA6	29	ignored
RNA-seq	3908	LAMA2	29	tagged
RNA-seq	5325	PLAGL1	29	ignored
RNA-seq	51422	PRKAG2	29	ignored
RNA-seq	4882	NPR2	29	tagged
RNA-seq	83667	SESN2	28	ignored
RNA-seq	969	CD69	28	tagged
RNA-seq	1201	CLN3	28	tagged
RNA-seq	10458	BAIAP2	28	ignored
RNA-seq	7130	TNFAIP6	28	ignored
RNA-seq	2043	EPHA4	28	ignored
RNA-seq	11040	PIM2	28	ignored
RNA-seq	8751	ADAM15	27	ignored
RNA-seq	5313	PKLR	27	tagged
RNA-seq	4776	NFATC4	27	tagged
RNA-seq	5700	PSMC1	27	tagged
RNA-seq	5685	PSMA4	27	ignored
RNA-seq	11214	AKAP13	27	ignored
RNA-seq	2280	FKBP1A	27	ignored
RNA-seq	291	SLC25A4	27	ignored
RNA-seq	2592	GALT	27	ignored
RNA-seq	6354	CCL7	26	tagged
RNA-seq	7305	TYROBP	26	ignored
RNA-seq	2204	FCAR	26	tagged
RNA-seq	11343	MGLL	26	tagged
RNA-seq	3622	ING2	26	ignored
RNA-seq	5980	REV3L	26	ignored
RNA-seq	8991	SELENBP1	25	tagged
RNA-seq	6282	S100A11	25	ignored
RNA-seq	838	CASP5	25	ignored
RNA-seq	27030	MLH3	25	ignored
RNA-seq	10928	RALBP1	25	ignored
RNA-seq	1476	CSTB	25	tagged
RNA-seq	5364	PLXNB1	25	tagged
RNA-seq	7148	TNXB	25	ignored
RNA-seq	5754	PTK7	25	ignored
RNA-seq	83605	CCM2	25	ignored
RNA-seq	759	CA1	25	tagged
RNA-seq	1793	DOCK1	24	ignored
RNA-seq	8519	IFITM1	24	tagged
RNA-seq	83700	JAM3	24	ignored
RNA-seq	338442	HCAR2	24	ignored
RNA-seq	10379	IRF9	24	tagged
RNA-seq	9516	LITAF	24	ignored
RNA-seq	9361	LONP1	24	tagged
RNA-seq	5585	PKN1	24	ignored
RNA-seq	8807	IL18RAP	24	tagged
RNA-seq	2580	GAK	24	tagged
RNA-seq	8662	EIF3B	24	ignored
RNA-seq	79870	BAALC	24	ignored
RNA-seq	6535	SLC6A8	24	tagged
RNA-seq	2633	GBP1	23	tagged
RNA-seq	55626	AMBRA1	23	ignored
RNA-seq	397	ARHGDIB	23	ignored
RNA-seq	57634	EP400	23	ignored
RNA-seq	161742	SPRED1	23	ignored
RNA-seq	9780	PIEZO1	23	ignored
RNA-seq	6687	SPG7	23	tagged
RNA-seq	6449	SGTA	23	tagged
RNA-seq	5655	KLK10	23	tagged
RNA-seq	3431	SP110	23	ignored
RNA-seq	1439	CSF2RB	23	ignored
RNA-seq	27074	LAMP3	23	tagged
RNA-seq	55770	EXOC2	23	tagged
RNA-seq	5689	PSMB1	23	ignored
RNA-seq	29914	UBIAD1	22	ignored
RNA-seq	714	C1QC	22	ignored
RNA-seq	3936	LCP1	22	ignored
RNA-seq	10038	PARP2	22	tagged
RNA-seq	54331	GNG2	22	ignored
RNA-seq	4775	NFATC3	22	ignored
RNA-seq	6909	TBX2	22	ignored
RNA-seq	3777	KCNK3	22	ignored
RNA-seq	23492	CBX7	22	ignored
RNA-seq	7134	TNNC1	22	ignored
RNA-seq	2745	GLRX	22	tagged
RNA-seq	9420	CYP7B1	22	ignored
RNA-seq	6901	TAZ	22	tagged
RNA-seq	984	CDK11B	21	tagged
RNA-seq	713	C1QB	21	ignored
RNA-seq	5284	PIGR	21	tagged
RNA-seq	7188	TRAF5	21	tagged
RNA-seq	79026	AHNAK	21	tagged
RNA-seq	8428	STK24	21	ignored
RNA-seq	26168	SENP3	21	tagged
RNA-seq	23309	SIN3B	21	ignored
RNA-seq	2523	FUT1	21	tagged
RNA-seq	91543	RSAD2	21	tagged
RNA-seq	4689	NCF4	21	ignored
RNA-seq	10752	CHL1	21	ignored
RNA-seq	6405	SEMA3F	21	ignored
RNA-seq	3660	IRF2	21	ignored
RNA-seq	8718	TNFRSF25	20	tagged
RNA-seq	11240	PADI2	20	tagged
RNA-seq	9246	UBE2L6	20	tagged
RNA-seq	5138	PDE2A	20	ignored
RNA-seq	1075	CTSC	20	tagged
RNA-seq	719	C3AR1	20	tagged
RNA-seq	26471	NUPR1	20	tagged
RNA-seq	23163	GGA3	20	ignored
RNA-seq	6294	SAFB	20	ignored
RNA-seq	79047	KCTD15	20	ignored
RNA-seq	671	BPI	20	tagged
RNA-seq	306	ANXA3	20	tagged
RNA-seq	4795	NFKBIL1	20	ignored
RNA-seq	56829	ZC3HAV1	20	tagged
RNA-seq	22827	PUF60	20	tagged
RNA-seq	23077	MYCBP2	19	tagged
RNA-seq	829	CAPZA1	19	ignored
RNA-seq	5362	PLXNA2	19	tagged
RNA-seq	11221	DUSP10	19	ignored
RNA-seq	259230	SGMS1	19	tagged
RNA-seq	219699	UNC5B	19	ignored
RNA-seq	729238	SFTPA2	19	tagged
RNA-seq	10346	TRIM22	19	tagged
RNA-seq	51773	RSF1	19	tagged
RNA-seq	54538	ROBO4	19	ignored
RNA-seq	4665	NAB2	19	ignored
RNA-seq	326625	MMAB	19	ignored
RNA-seq	10572	SIVA1	19	ignored
RNA-seq	1186	CLCN7	19	ignored
RNA-seq	23035	PHLPP2	19	ignored
RNA-seq	7156	TOP3A	19	ignored
RNA-seq	3384	ICAM2	19	ignored
RNA-seq	5534	PPP3R1	19	tagged
RNA-seq	4999	ORC2	19	ignored
RNA-seq	6453	ITSN1	19	ignored
RNA-seq	26088	GGA1	19	ignored
RNA-seq	1475	CSTA	19	tagged
RNA-seq	86	ACTL6A	19	ignored
RNA-seq	10144	FAM13A	19	ignored
RNA-seq	9794	MAML1	19	ignored
RNA-seq	252969	NEIL2	19	ignored
RNA-seq	10912	GADD45G	19	ignored
RNA-seq	2959	GTF2B	18	tagged
RNA-seq	3434	IFIT1	18	tagged
RNA-seq	9646	CTR9	18	ignored
RNA-seq	8567	MADD	18	tagged
RNA-seq	84811	BUD13	18	ignored
RNA-seq	8638	OASL	18	tagged
RNA-seq	23368	PPP1R13B	18	ignored
RNA-seq	771	CA12	18	ignored
RNA-seq	8125	ANP32A	18	ignored
RNA-seq	3073	HEXA	18	tagged
RNA-seq	585	BBS4	18	ignored
RNA-seq	1489	CTF1	18	tagged
RNA-seq	23293	SMG6	18	ignored
RNA-seq	9322	TRIP10	18	tagged
RNA-seq	126393	HSPB6	18	ignored
RNA-seq	64344	HIF3A	18	tagged
RNA-seq	4358	MPV17	18	ignored
RNA-seq	4144	MAT2A	18	tagged
RNA-seq	6257	RXRB	18	ignored
RNA-seq	2889	RAPGEF1	18	ignored
RNA-seq	6102	RP2	18	tagged
RNA-seq	7813	EVI5	17	ignored
RNA-seq	6947	TCN1	17	tagged
RNA-seq	5830	PEX5	17	ignored
RNA-seq	3764	KCNJ8	17	tagged
RNA-seq	84790	TUBA1C	17	ignored
RNA-seq	10847	SRCAP	17	ignored
RNA-seq	37	ACADVL	17	ignored
RNA-seq	4616	GADD45B	17	tagged
RNA-seq	87178	PNPT1	17	ignored
RNA-seq	7277	TUBA4A	17	tagged
RNA-seq	84289	ING5	17	ignored
RNA-seq	81030	ZBP1	17	tagged
RNA-seq	3954	LETM1	17	ignored
RNA-seq	51191	HERC5	17	tagged
RNA-seq	8622	PDE8B	17	ignored
RNA-seq	26249	KLHL3	17	ignored
RNA-seq	3134	HLA-F	17	ignored
RNA-seq	114327	EFHC1	17	ignored
RNA-seq	8676	STX11	17	ignored
RNA-seq	6993	DYNLT1	17	ignored
RNA-seq	26959	HBP1	17	ignored
RNA-seq	57704	GBA2	17	ignored
RNA-seq	2219	FCN1	17	tagged
RNA-seq	11190	CEP250	16	tagged
RNA-seq	1298	COL9A2	16	ignored
RNA-seq	777	CACNA1E	16	tagged
RNA-seq	8028	MLLT10	16	ignored
RNA-seq	4940	OAS3	16	tagged
RNA-seq	527	ATP6V0C	16	ignored
RNA-seq	79791	FBXO31	16	ignored
RNA-seq	60528	ELAC2	16	ignored
RNA-seq	6355	CCL8	16	tagged
RNA-seq	9230	RAB11B	16	ignored
RNA-seq	4084	MXD1	16	ignored
RNA-seq	9111	NMI	16	ignored
RNA-seq	6525	SMTN	16	ignored
RNA-seq	10181	RBM5	16	ignored
RNA-seq	54464	XRN1	16	ignored
RNA-seq	64116	SLC39A8	16	ignored
RNA-seq	5166	PDK4	16	tagged
RNA-seq	8266	UBL4A	16	tagged
RNA-seq	23339	VPS39	15	ignored
RNA-seq	55210	ATAD3A	15	ignored
RNA-seq	4678	NASP	15	tagged
RNA-seq	56957	OTUD7B	15	ignored
RNA-seq	4720	NDUFS2	15	ignored
RNA-seq	6199	RPS6KB2	15	ignored
RNA-seq	10161	LPAR6	15	tagged
RNA-seq	6036	RNASE2	15	tagged
RNA-seq	51339	DACT1	15	ignored
RNA-seq	9810	RNF40	15	ignored
RNA-seq	6236	RRAD	15	tagged
RNA-seq	83871	RAB34	15	ignored
RNA-seq	7171	TPM4	15	ignored
RNA-seq	23192	ATG4B	15	ignored
RNA-seq	2937	GSS	15	tagged
RNA-seq	7290	HIRA	15	tagged
RNA-seq	25776	CBY1	15	ignored
RNA-seq	5333	PLCD1	15	ignored
RNA-seq	8820	HESX1	15	ignored
RNA-seq	79155	TNIP2	15	ignored
RNA-seq	399	RHOH	15	tagged
RNA-seq	8404	SPARCL1	15	ignored
RNA-seq	729	C6	15	tagged
RNA-seq	285590	SH3PXD2B	15	ignored
RNA-seq	10321	CRISP3	15	ignored
RNA-seq	6196	RPS6KA2	15	tagged
RNA-seq	56975	FAM20C	15	ignored
RNA-seq	55971	BAIAP2L1	15	ignored
RNA-seq	54461	FBXW5	15	ignored
RNA-seq	3155	HMGCL	14	ignored
RNA-seq	26119	LDLRAP1	14	tagged
RNA-seq	8556	CDC14A	14	ignored
RNA-seq	962	CD48	14	ignored
RNA-seq	5768	QSOX1	14	tagged
RNA-seq	80314	EPC1	14	ignored
RNA-seq	55749	CCAR1	14	ignored
RNA-seq	8861	LDB1	14	ignored
RNA-seq	4601	MXI1	14	ignored
RNA-seq	10313	RTN3	14	ignored
RNA-seq	2615	LRRC32	14	ignored
RNA-seq	23187	PHLDB1	14	ignored
RNA-seq	112	ADCY6	14	ignored
RNA-seq	54434	SSH1	14	ignored
RNA-seq	83892	KCTD10	14	ignored
RNA-seq	8550	MAPKAPK5	14	ignored
RNA-seq	53373	TPCN1	14	tagged
RNA-seq	51131	PHF11	14	ignored
RNA-seq	84962	AJUBA	14	ignored
RNA-seq	23002	DAAM1	14	tagged
RNA-seq	79650	USB1	14	tagged
RNA-seq	8558	CDK10	14	tagged
RNA-seq	8526	DGKE	14	ignored
RNA-seq	4097	MAFG	14	tagged
RNA-seq	10939	AFG3L2	14	ignored
RNA-seq	1153	CIRBP	14	ignored
RNA-seq	8890	EIF2B4	14	ignored
RNA-seq	1716	DGUOK	14	tagged
RNA-seq	253782	CERS6	14	ignored
RNA-seq	4134	MAP4	14	tagged
RNA-seq	7869	SEMA3B	14	ignored
RNA-seq	10641	NPRL2	14	ignored
RNA-seq	200894	ARL13B	14	ignored
RNA-seq	8893	EIF2B5	14	ignored
RNA-seq	493856	CISD2	14	ignored
RNA-seq	10409	BASP1	14	ignored
RNA-seq	5272	SERPINB9	14	ignored
RNA-seq	5528	PPP2R5D	14	ignored
RNA-seq	6943	TCF21	14	ignored
RNA-seq	7984	ARHGEF5	14	tagged
RNA-seq	23237	ARC	14	tagged
RNA-seq	6130	RPL7A	14	ignored
RNA-seq	6834	SURF1	14	tagged
RNA-seq	8241	RBM10	14	ignored
RNA-seq	6853	SYN1	14	ignored
RNA-seq	6134	RPL10	14	ignored
RNA-seq	55823	VPS11	13	tagged
RNA-seq	7389	UROD	13	tagged
RNA-seq	90780	PYGO2	13	ignored
RNA-seq	10529	NEBL	13	ignored
RNA-seq	10522	DEAF1	13	ignored
RNA-seq	154810	AMOTL1	13	ignored
RNA-seq	26253	CLEC4E	13	ignored
RNA-seq	2012	EMP1	13	tagged
RNA-seq	115557	ARHGEF25	13	ignored
RNA-seq	4331	MNAT1	13	ignored
RNA-seq	2242	FES	13	ignored
RNA-seq	2013	EMP2	13	ignored
RNA-seq	5119	CHMP1A	13	tagged
RNA-seq	10052	GJC1	13	ignored
RNA-seq	8666	EIF3G	13	ignored
RNA-seq	5989	RFX1	13	ignored
RNA-seq	2867	FFAR2	13	tagged
RNA-seq	9138	ARHGEF1	13	ignored
RNA-seq	7837	PXDN	13	ignored
RNA-seq	5013	OTX1	13	ignored
RNA-seq	7456	WIPF1	13	ignored
RNA-seq	8664	EIF3D	13	ignored
RNA-seq	8536	CAMK1	13	ignored
RNA-seq	22906	TRAK1	13	ignored
RNA-seq	7936	NELFE	13	tagged
RNA-seq	6499	SKIV2L	13	ignored
RNA-seq	8645	KCNK5	13	ignored
RNA-seq	1303	COL12A1	13	ignored
RNA-seq	10875	FGL2	13	tagged
RNA-seq	944	TNFSF8	13	tagged
RNA-seq	9470	EIF4E2	12	ignored
RNA-seq	79594	MUL1	12	tagged
RNA-seq	2268	FGR	12	ignored
RNA-seq	2207	FCER1G	12	ignored
RNA-seq	3437	IFIT3	12	tagged
RNA-seq	57661	PHRF1	12	ignored
RNA-seq	5553	PRG2	12	ignored
RNA-seq	64221	ROBO3	12	tagged
RNA-seq	8445	DYRK2	12	ignored
RNA-seq	283450	HECTD4	12	ignored
RNA-seq	2877	GPX2	12	ignored
RNA-seq	5373	PMM2	12	tagged
RNA-seq	51573	GDE1	12	tagged
RNA-seq	218	ALDH3A1	12	tagged
RNA-seq	3386	ICAM4	12	ignored
RNA-seq	1084	CEACAM3	12	tagged
RNA-seq	8778	SIGLEC5	12	tagged
RNA-seq	7145	TNS1	12	ignored
RNA-seq	24144	TFIP11	12	ignored
RNA-seq	6189	RPS3A	12	tagged
RNA-seq	2180	ACSL1	12	tagged
RNA-seq	27125	AFF4	12	ignored
RNA-seq	10915	TCERG1	12	ignored
RNA-seq	64780	MICAL1	12	ignored
RNA-seq	7091	TLE4	12	ignored
RNA-seq	51177	PLEKHO1	11	ignored
RNA-seq	57823	SLAMF7	11	tagged
RNA-seq	9103	FCGR2C	11	ignored
RNA-seq	1510	CTSE	11	ignored
RNA-seq	5552	SRGN	11	ignored
RNA-seq	5450	POU2AF1	11	ignored
RNA-seq	27289	RND1	11	ignored
RNA-seq	4939	OAS2	11	tagged
RNA-seq	55795	PCID2	11	ignored
RNA-seq	56339	METTL3	11	tagged
RNA-seq	57617	VPS18	11	tagged
RNA-seq	25989	ULK3	11	ignored
RNA-seq	5955	RCN2	11	ignored
RNA-seq	64131	XYLT1	11	ignored
RNA-seq	29123	ANKRD11	11	tagged
RNA-seq	6830	SUPT6H	11	ignored
RNA-seq	30837	SOCS7	11	ignored
RNA-seq	10948	STARD3	11	ignored
RNA-seq	6442	SGCA	11	tagged
RNA-seq	79643	CHMP6	11	ignored
RNA-seq	8993	PGLYRP1	11	tagged
RNA-seq	57162	PELI1	11	tagged
RNA-seq	5341	PLEK	11	tagged
RNA-seq	60482	SLC5A7	11	ignored
RNA-seq	64601	VPS16	11	ignored
RNA-seq	9371	KIF3B	11	ignored
RNA-seq	6651	SON	11	tagged
RNA-seq	5152	PDE9A	11	ignored
RNA-seq	23551	RASD2	11	ignored
RNA-seq	6122	RPL3	11	tagged
RNA-seq	51517	NCKIPSD	11	ignored
RNA-seq	63891	RNF123	11	ignored
RNA-seq	10039	PARP3	11	ignored
RNA-seq	3059	HCLS1	11	ignored
RNA-seq	30849	PIK3R4	11	ignored
RNA-seq	23043	TNIK	11	ignored
RNA-seq	27306	HPGDS	11	ignored
RNA-seq	23	ABCF1	11	ignored
RNA-seq	7940	LST1	11	tagged
RNA-seq	39	ACAT2	11	ignored
RNA-seq	55665	URGCP	11	ignored
RNA-seq	9046	DOK2	11	ignored
RNA-seq	90678	LRSAM1	11	ignored
RNA-seq	1503	CTPS1	10	ignored
RNA-seq	23139	MAST2	10	ignored
RNA-seq	11080	DNAJB4	10	ignored
RNA-seq	58155	PTBP2	10	ignored
RNA-seq	23381	SMG5	10	ignored
RNA-seq	3433	IFIT2	10	tagged
RNA-seq	9748	SLK	10	ignored
RNA-seq	160364	CLEC12A	10	ignored
RNA-seq	2647	BLOC1S1	10	ignored
RNA-seq	5250	SLC25A3	10	tagged
RNA-seq	23545	ATP6V0A2	10	tagged
RNA-seq	29954	POMT2	10	ignored
RNA-seq	64112	MOAP1	10	ignored
RNA-seq	55784	MCTP2	10	ignored
RNA-seq	9727	RAB11FIP3	10	ignored
RNA-seq	64386	MMP25	10	ignored
RNA-seq	23295	MGRN1	10	ignored
RNA-seq	80152	CENPT	10	ignored
RNA-seq	4642	MYO1D	10	ignored
RNA-seq	3607	FOXK2	10	ignored
RNA-seq	10870	HCST	10	ignored
RNA-seq	1178	CLC	10	tagged
RNA-seq	284340	CXCL17	10	tagged
RNA-seq	6141	RPL18	10	tagged
RNA-seq	55011	PIH1D1	10	ignored
RNA-seq	200504	GKN2	10	ignored
RNA-seq	79065	ATG9A	10	ignored
RNA-seq	11262	SP140	10	ignored
RNA-seq	10904	BLCAP	10	ignored
RNA-seq	89781	HPS4	10	ignored
RNA-seq	7477	WNT7B	10	ignored
RNA-seq	9975	NR1D2	10	ignored
RNA-seq	3340	NDST1	10	tagged
RNA-seq	23113	CUL9	10	tagged
RNA-seq	7975	MAFK	10	tagged
RNA-seq	54809	SAMD9	10	ignored
RNA-seq	29992	PILRA	10	ignored
RNA-seq	80228	ORAI2	10	ignored
RNA-seq	8972	MGAM	10	tagged
RNA-seq	23259	DDHD2	10	ignored
RNA-seq	65986	ZBTB10	10	ignored
RNA-seq	7270	TTF1	10	tagged
RNA-seq	5900	RALGDS	10	ignored
RNA-seq	8019	BRD3	10	ignored
RNA-seq	28985	MCTS1	10	ignored
RNA-seq	9659	PDE4DIP	9	tagged
RNA-seq	1185	CLCN6	9	ignored
RNA-seq	23207	PLEKHM2	9	ignored
RNA-seq	2275	FHL3	9	ignored
RNA-seq	9411	ARHGAP29	9	ignored
RNA-seq	10581	IFITM2	9	tagged
RNA-seq	114879	OSBPL5	9	ignored
RNA-seq	29763	PACSIN3	9	ignored
RNA-seq	58487	CREBZF	9	ignored
RNA-seq	28960	DCPS	9	ignored
RNA-seq	50856	CLEC4A	9	ignored
RNA-seq	9924	PAN2	9	ignored
RNA-seq	27198	HCAR1	9	ignored
RNA-seq	7750	ZMYM2	9	tagged
RNA-seq	341640	FREM2	9	ignored
RNA-seq	23348	DOCK9	9	ignored
RNA-seq	23263	MCF2L	9	tagged
RNA-seq	8477	GPR65	9	ignored
RNA-seq	9321	TRIP11	9	ignored
RNA-seq	2644	GCHFR	9	ignored
RNA-seq	54971	BANP	9	ignored
RNA-seq	27189	IL17C	9	ignored
RNA-seq	6137	RPL13	9	tagged
RNA-seq	535	ATP6V0A1	9	tagged
RNA-seq	8165	AKAP1	9	ignored
RNA-seq	124583	CANT1	9	tagged
RNA-seq	56949	XAB2	9	ignored
RNA-seq	51293	CD320	9	ignored
RNA-seq	29950	SERTAD1	9	tagged
RNA-seq	27036	SIGLEC7	9	tagged
RNA-seq	57217	TTC7A	9	ignored
RNA-seq	83439	TCF7L1	9	ignored
RNA-seq	27352	SGSM3	9	ignored
RNA-seq	55687	TRMU	9	ignored
RNA-seq	114884	OSBPL10	9	ignored
RNA-seq	65010	SLC26A6	9	tagged
RNA-seq	9934	P2RY14	9	ignored
RNA-seq	64087	MCCC2	9	tagged
RNA-seq	63027	SLC22A23	9	ignored
RNA-seq	11118	BTN3A2	9	ignored
RNA-seq	51608	GET4	9	tagged
RNA-seq	445347	TARP	9	tagged
RNA-seq	64764	CREB3L2	9	ignored
RNA-seq	84232	MAF1	9	ignored
RNA-seq	8287	USP9Y	9	ignored
RNA-seq	23177	CEP68	8	ignored
RNA-seq	25831	HECTD1	8	ignored
RNA-seq	118424	UBE2J2	8	ignored
RNA-seq	83858	ATAD3B	8	ignored
RNA-seq	55920	RCC2	8	ignored
RNA-seq	3633	INPP5B	8	tagged
RNA-seq	6284	S100A13	8	ignored
RNA-seq	81559	TRIM11	8	tagged
RNA-seq	54518	APBB1IP	8	ignored
RNA-seq	5507	PPP1R3C	8	ignored
RNA-seq	3983	ABLIM1	8	ignored
RNA-seq	4676	NAP1L4	8	ignored
RNA-seq	5436	POLR2G	8	ignored
RNA-seq	5526	PPP2R5B	8	ignored
RNA-seq	4054	LTBP3	8	tagged
RNA-seq	25988	HINFP	8	ignored
RNA-seq	9802	DAZAP2	8	ignored
RNA-seq	22877	MLXIP	8	ignored
RNA-seq	219402	MTIF3	8	ignored
RNA-seq	9517	SPTLC2	8	ignored
RNA-seq	7782	SLC30A4	8	ignored
RNA-seq	10681	GNB5	8	ignored
RNA-seq	23644	EDC4	8	ignored
RNA-seq	9842	PLEKHM1	8	ignored
RNA-seq	9496	TBX4	8	ignored
RNA-seq	10610	ST6GALNAC2	8	tagged
RNA-seq	57602	USP36	8	ignored
RNA-seq	55556	ENOSF1	8	ignored
RNA-seq	9150	CTDP1	8	ignored
RNA-seq	951	CD37	8	ignored
RNA-seq	11024	LILRA1	8	ignored
RNA-seq	55037	PTCD3	8	ignored
RNA-seq	22868	FASTKD2	8	ignored
RNA-seq	80895	ILKAP	8	ignored
RNA-seq	116448	OLIG1	8	ignored
RNA-seq	4600	MX2	8	tagged
RNA-seq	23171	GPD1L	8	ignored
RNA-seq	7384	UQCRC1	8	ignored
RNA-seq	10869	USP19	8	ignored
RNA-seq	211	ALAS1	8	tagged
RNA-seq	80216	ALPK1	8	tagged
RNA-seq	57630	SH3RF1	8	ignored
RNA-seq	79930	DOK3	8	ignored
RNA-seq	2762	GMDS	8	ignored
RNA-seq	9450	LY86	8	ignored
RNA-seq	435	ASL	8	tagged
RNA-seq	6867	TACC1	8	ignored
RNA-seq	6132	RPL8	8	tagged
RNA-seq	55357	TBC1D2	8	ignored
RNA-seq	10868	USP20	8	ignored
RNA-seq	2824	GPM6B	8	ignored
RNA-seq	2564	GABRE	8	ignored
RNA-seq	2802	GOLGA3	7	ignored
RNA-seq	11340	EXOSC8	7	tagged
RNA-seq	23252	OTUD3	7	ignored
RNA-seq	9064	MAP3K6	7	ignored
RNA-seq	1912	PHC2	7	ignored
RNA-seq	8515	ITGA10	7	ignored
RNA-seq	10262	SF3B4	7	ignored
RNA-seq	100287932	TIMM23	7	ignored
RNA-seq	11196	SEC23IP	7	ignored
RNA-seq	51035	UBXN1	7	ignored
RNA-seq	55191	NADSYN1	7	ignored
RNA-seq	9743	ARHGAP32	7	ignored
RNA-seq	4798	NFRKB	7	ignored
RNA-seq	79370	BCL2L14	7	ignored
RNA-seq	3887	KRT81	7	ignored
RNA-seq	51347	TAOK3	7	ignored
RNA-seq	57194	ATP10A	7	ignored
RNA-seq	80031	SEMA6D	7	ignored
RNA-seq	80153	EDC3	7	ignored
RNA-seq	55898	UNC45A	7	ignored
RNA-seq	1877	E4F1	7	ignored
RNA-seq	91949	COG7	7	ignored
RNA-seq	79447	PAGR1	7	tagged
RNA-seq	26470	SEZ6L2	7	ignored
RNA-seq	79798	ARMC5	7	ignored
RNA-seq	55715	DOK4	7	ignored
RNA-seq	116840	CNTROB	7	ignored
RNA-seq	7266	DNAJC7	7	ignored
RNA-seq	51747	LUC7L3	7	tagged
RNA-seq	55062	WIPI1	7	ignored
RNA-seq	57409	MIF4GD	7	ignored
RNA-seq	63893	UBE2O	7	ignored
RNA-seq	55250	ELP2	7	tagged
RNA-seq	57572	DOCK6	7	tagged
RNA-seq	9466	IL27RA	7	tagged
RNA-seq	4051	CYP4F3	7	tagged
RNA-seq	8853	ASAP2	7	ignored
RNA-seq	81606	LBH	7	ignored
RNA-seq	10893	MMP24	7	ignored
RNA-seq	79913	ACTR5	7	ignored
RNA-seq	84619	ZGPAT	7	ignored
RNA-seq	7165	TPD52L2	7	tagged
RNA-seq	64092	SAMSN1	7	tagged
RNA-seq	8566	PDXK	7	tagged
RNA-seq	57553	MICAL3	7	ignored
RNA-seq	9647	PPM1F	7	ignored
RNA-seq	91582	RPS19BP1	7	ignored
RNA-seq	26228	STAP1	7	ignored
RNA-seq	79931	TNIP3	7	tagged
RNA-seq	65980	BRD9	7	ignored
RNA-seq	10605	PAIP1	7	ignored
RNA-seq	10814	CPLX2	7	ignored
RNA-seq	2766	GMPR	7	ignored
RNA-seq	10475	TRIM38	7	ignored
RNA-seq	116369	SLC26A8	7	tagged
RNA-seq	9841	ZBTB24	7	ignored
RNA-seq	387119	CEP85L	7	ignored
RNA-seq	54476	RNF216	7	ignored
RNA-seq	154807	VKORC1L1	7	ignored
RNA-seq	5569	PKIA	7	ignored
RNA-seq	83988	NCALD	7	ignored
RNA-seq	7111	TMOD1	7	ignored
RNA-seq	25920	NELFB	7	tagged
RNA-seq	64219	PJA1	7	ignored
RNA-seq	393	ARHGAP4	7	ignored
RNA-seq	10844	TUBGCP2	6	ignored
RNA-seq	55735	DNAJC11	6	tagged
RNA-seq	10772	SRSF10	6	ignored
RNA-seq	79947	DHDDS	6	ignored
RNA-seq	6487	ST3GAL3	6	ignored
RNA-seq	85369	STRIP1	6	ignored
RNA-seq	1117	CHI3L2	6	ignored
RNA-seq	117145	THEM4	6	tagged
RNA-seq	4332	MNDA	6	tagged
RNA-seq	8444	DYRK3	6	ignored
RNA-seq	8495	PPFIBP2	6	ignored
RNA-seq	219988	PATL1	6	ignored
RNA-seq	79869	CPSF7	6	ignored
RNA-seq	10102	TSFM	6	ignored
RNA-seq	22895	RPH3A	6	ignored
RNA-seq	7556	ZNF10	6	ignored
RNA-seq	54737	MPHOSPH8	6	ignored
RNA-seq	11183	MAP4K5	6	ignored
RNA-seq	85439	STON2	6	ignored
RNA-seq	440193	CCDC88C	6	ignored
RNA-seq	55505	NOP10	6	ignored
RNA-seq	51762	RAB8B	6	ignored
RNA-seq	51704	GPRC5B	6	ignored
RNA-seq	57149	LYRM1	6	ignored
RNA-seq	1801	DPH1	6	ignored
RNA-seq	23164	MPRIP	6	ignored
RNA-seq	146691	TOM1L2	6	ignored
RNA-seq	125058	TBC1D16	6	ignored
RNA-seq	6904	TBCD	6	ignored
RNA-seq	25759	SHC2	6	ignored
RNA-seq	55620	STAP2	6	ignored
RNA-seq	10469	TIMM44	6	ignored
RNA-seq	51295	ECSIT	6	ignored
RNA-seq	1725	DHPS	6	ignored
RNA-seq	29911	HOOK2	6	ignored
RNA-seq	8775	NAPA	6	ignored
RNA-seq	100049587	SIGLEC14	6	ignored
RNA-seq	11025	LILRB3	6	ignored
RNA-seq	6193	RPS5	6	tagged
RNA-seq	9595	CYTIP	6	ignored
RNA-seq	90134	KCNH7	6	ignored
RNA-seq	57703	CWC22	6	ignored
RNA-seq	66008	TRAK2	6	ignored
RNA-seq	84532	ACSS1	6	tagged
RNA-seq	9139	CBFA2T2	6	ignored
RNA-seq	83658	DYNLRB1	6	ignored
RNA-seq	10953	TOMM34	6	ignored
RNA-seq	91445	RNF185	6	ignored
RNA-seq	85378	TUBGCP6	6	ignored
RNA-seq	23016	EXOSC7	6	tagged
RNA-seq	83893	SPATA16	6	ignored
RNA-seq	55300	PI4K2B	6	ignored
RNA-seq	27284	SULT1B1	6	ignored
RNA-seq	133308	SLC9B2	6	ignored
RNA-seq	57721	METTL14	6	ignored
RNA-seq	5019	OXCT1	6	ignored
RNA-seq	27166	PRELID1	6	ignored
RNA-seq	9509	ADAMTS2	6	tagged
RNA-seq	7005	TEAD3	6	ignored
RNA-seq	81552	VOPP1	6	ignored
RNA-seq	1595	CYP51A1	6	ignored
RNA-seq	9179	AP4M1	6	ignored
RNA-seq	51530	ZC3HC1	6	ignored
RNA-seq	5157	PDGFRL	6	ignored
RNA-seq	64236	PDLIM2	6	ignored
RNA-seq	10656	KHDRBS3	6	tagged
RNA-seq	84628	NTNG2	6	ignored
RNA-seq	28952	CCDC22	6	ignored
RNA-seq	5303	PIN4	6	ignored
RNA-seq	10426	TUBGCP3	5	ignored
RNA-seq	2787	GNG5	5	ignored
RNA-seq	64744	SMAP2	5	ignored
RNA-seq	114034	TOE1	5	ignored
RNA-seq	387338	NSUN4	5	ignored
RNA-seq	200014	CC2D1B	5	ignored
RNA-seq	10561	IFI44	5	tagged
RNA-seq	115362	GBP5	5	tagged
RNA-seq	23443	SLC35A3	5	ignored
RNA-seq	963	CD53	5	tagged
RNA-seq	4580	MTX1	5	ignored
RNA-seq	23208	SYT11	5	ignored
RNA-seq	9877	ZC3H11A	5	ignored
RNA-seq	84976	DISP1	5	ignored
RNA-seq	219790	RTKN2	5	tagged
RNA-seq	24138	IFIT5	5	ignored
RNA-seq	85450	ITPRIP	5	tagged
RNA-seq	53841	CDHR5	5	ignored
RNA-seq	374378	GALNT18	5	ignored
RNA-seq	258010	SVIP	5	ignored
RNA-seq	10809	STARD10	5	ignored
RNA-seq	51202	DDX47	5	ignored
RNA-seq	121536	AEBP2	5	ignored
RNA-seq	57542	KLHL42	5	ignored
RNA-seq	9416	DDX23	5	ignored
RNA-seq	10106	CTDSP2	5	ignored
RNA-seq	2004	ELK3	5	tagged
RNA-seq	84749	USP30	5	ignored
RNA-seq	80324	PUS1	5	ignored
RNA-seq	11215	AKAP11	5	tagged
RNA-seq	30844	EHD4	5	ignored
RNA-seq	57519	STARD9	5	ignored
RNA-seq	100820829	MYZAP	5	ignored
RNA-seq	9245	GCNT3	5	ignored
RNA-seq	64285	RHBDF1	5	ignored
RNA-seq	57407	NMRAL1	5	ignored
RNA-seq	10300	KATNB1	5	tagged
RNA-seq	51192	CKLF	5	tagged
RNA-seq	92162	TMEM88	5	ignored
RNA-seq	9955	HS3ST3A1	5	ignored
RNA-seq	85464	SSH2	5	ignored
RNA-seq	6448	SGSH	5	ignored
RNA-seq	1068	CETN1	5	ignored
RNA-seq	55197	RPRD1A	5	ignored
RNA-seq	8498	RANBP3	5	ignored
RNA-seq	8192	CLPP	5	ignored
RNA-seq	2193	FARSA	5	ignored
RNA-seq	84941	HSH2D	5	tagged
RNA-seq	10437	IFI30	5	tagged
RNA-seq	25804	LSM4	5	ignored
RNA-seq	8625	RFXANK	5	ignored
RNA-seq	54922	RASIP1	5	tagged
RNA-seq	79735	TBC1D17	5	ignored
RNA-seq	51542	VPS54	5	ignored
RNA-seq	130617	ZFAND2B	5	ignored
RNA-seq	55230	USP40	5	ignored
RNA-seq	10326	SIRPB1	5	ignored
RNA-seq	116835	HSPA12B	5	ignored
RNA-seq	23315	SLC9A8	5	ignored
RNA-seq	11083	DIDO1	5	ignored
RNA-seq	10139	ARFRP1	5	ignored
RNA-seq	5211	PFKL	5	ignored
RNA-seq	23275	POFUT2	5	ignored
RNA-seq	55670	PEX26	5	ignored
RNA-seq	8216	LZTR1	5	tagged
RNA-seq	23761	PISD	5	ignored
RNA-seq	4357	MPST	5	ignored
RNA-seq	9701	PPP6R2	5	tagged
RNA-seq	9467	SH3BP5	5	ignored
RNA-seq	64651	CSRNP1	5	tagged
RNA-seq	83666	PARP9	5	tagged
RNA-seq	55186	SLC25A36	5	ignored
RNA-seq	23355	VPS8	5	ignored
RNA-seq	7469	NELFA	5	ignored
RNA-seq	6002	RGS12	5	ignored
RNA-seq	260436	FDCSP	5	tagged
RNA-seq	51316	PLAC8	5	tagged
RNA-seq	23158	TBC1D9	5	ignored
RNA-seq	55602	CDKN2AIP	5	ignored
RNA-seq	4726	NDUFS6	5	ignored
RNA-seq	8507	ENC1	5	ignored
RNA-seq	64411	ARAP3	5	ignored
RNA-seq	10279	PRSS16	5	ignored
RNA-seq	1388	ATF6B	5	ignored
RNA-seq	23500	DAAM2	5	ignored
RNA-seq	26036	ZNF451	5	ignored
RNA-seq	64208	POPDC3	5	ignored
RNA-seq	64005	MYO1G	5	tagged
RNA-seq	10095	ARPC1B	5	tagged
RNA-seq	55303	GIMAP4	5	ignored
RNA-seq	10922	FASTK	5	tagged
RNA-seq	9172	MYOM2	5	tagged
RNA-seq	9258	MFHAS1	5	ignored
RNA-seq	55174	INTS10	5	ignored
RNA-seq	10497	UNC13B	5	ignored
RNA-seq	84186	ZCCHC7	5	ignored
RNA-seq	64425	POLR1E	5	ignored
RNA-seq	27348	TOR1B	5	tagged
RNA-seq	6838	SURF6	5	ignored
RNA-seq	55684	RABL6	5	tagged
RNA-seq	9022	CLIC3	5	ignored
RNA-seq	5613	PRKX	5	ignored
RNA-seq	8233	ZRSR2	5	ignored
RNA-seq	5355	PLP2	5	tagged
RNA-seq	9452	ITM2A	5	ignored
RNA-seq	55206	SBNO1	4	ignored
RNA-seq	23787	MTCH1	4	ignored
RNA-seq	84196	USP48	4	ignored
RNA-seq	2537	IFI6	4	tagged
RNA-seq	1307	COL16A1	4	ignored
RNA-seq	54802	TRIT1	4	ignored
RNA-seq	10623	POLR3C	4	ignored
RNA-seq	8703	B4GALT3	4	ignored
RNA-seq	84824	FCRLA	4	ignored
RNA-seq	9910	RABGAP1L	4	ignored
RNA-seq	9917	FAM20B	4	ignored
RNA-seq	64407	RGS18	4	ignored
RNA-seq	3707	ITPKB	4	ignored
RNA-seq	148789	B3GALNT2	4	ignored
RNA-seq	163882	CNST	4	ignored
RNA-seq	221079	ARL5B	4	ignored
RNA-seq	9576	SPAG6	4	ignored
RNA-seq	118813	ZFYVE27	4	ignored
RNA-seq	9679	FAM53B	4	ignored
RNA-seq	8642	DCHS1	4	ignored
RNA-seq	90139	TSPAN18	4	ignored
RNA-seq	81544	GDPD5	4	ignored
RNA-seq	55810	FOXJ2	4	ignored
RNA-seq	387837	CLEC12B	4	ignored
RNA-seq	79887	PLBD1	4	ignored
RNA-seq	91012	CERS5	4	ignored
RNA-seq	6171	RPL41	4	tagged
RNA-seq	120935	CCDC38	4	ignored
RNA-seq	11066	SNRNP35	4	ignored
RNA-seq	122769	LRR1	4	ignored
RNA-seq	376267	RAB15	4	ignored
RNA-seq	8816	DCAF5	4	ignored
RNA-seq	1396	CRIP1	4	tagged
RNA-seq	4947	OAZ2	4	ignored
RNA-seq	4832	NME3	4	ignored
RNA-seq	28955	DEXI	4	ignored
RNA-seq	56942	CMC2	4	ignored
RNA-seq	123872	DNAAF1	4	ignored
RNA-seq	9905	SGSM2	4	ignored
RNA-seq	147040	KCTD11	4	ignored
RNA-seq	22899	ARHGEF15	4	ignored
RNA-seq	9912	ARHGAP44	4	ignored
RNA-seq	125150	ZSWIM7	4	ignored
RNA-seq	55813	UTP6	4	ignored
RNA-seq	56970	ATXN7L3	4	ignored
RNA-seq	283989	TSEN54	4	ignored
RNA-seq	64772	ENGASE	4	ignored
RNA-seq	753	LDLRAD4	4	ignored
RNA-seq	29985	SLC39A3	4	ignored
RNA-seq	25959	KANK2	4	ignored
RNA-seq	9535	GMFG	4	ignored
RNA-seq	29888	STRN4	4	ignored
RNA-seq	93233	CCDC114	4	ignored
RNA-seq	22950	SLC4A1AP	4	ignored
RNA-seq	6936	GCFC2	4	tagged
RNA-seq	85461	TANC1	4	ignored
RNA-seq	25801	GCA	4	ignored
RNA-seq	84128	WDR75	4	ignored
RNA-seq	64114	TMBIM1	4	ignored
RNA-seq	81572	PDRG1	4	ignored
RNA-seq	23613	ZMYND8	4	ignored
RNA-seq	140685	ZBTB46	4	ignored
RNA-seq	80764	THAP7	4	ignored
RNA-seq	23760	PITPNB	4	ignored
RNA-seq	22880	MORC2	4	ignored
RNA-seq	80830	APOL6	4	ignored
RNA-seq	7008	TEF	4	ignored
RNA-seq	79174	CRELD2	4	ignored
RNA-seq	29781	NCAPH2	4	ignored
RNA-seq	7123	CLEC3B	4	tagged
RNA-seq	10180	RBM6	4	ignored
RNA-seq	57060	PCBP4	4	ignored
RNA-seq	91869	RFT1	4	ignored
RNA-seq	166336	PRICKLE2	4	ignored
RNA-seq	54800	KLHL24	4	ignored
RNA-seq	10336	PCGF3	4	ignored
RNA-seq	79625	NDNF	4	tagged
RNA-seq	79658	ARHGAP10	4	ignored
RNA-seq	54505	DHX29	4	ignored
RNA-seq	55781	RIOK2	4	ignored
RNA-seq	8859	STK19	4	ignored
RNA-seq	63940	GPSM3	4	ignored
RNA-seq	79683	ZDHHC14	4	ignored
RNA-seq	79778	MICALL2	4	ignored
RNA-seq	11185	INMT	4	ignored
RNA-seq	136647	MPLKIP	4	ignored
RNA-seq	8460	TPST1	4	ignored
RNA-seq	105375355	UPK3B	4	ignored
RNA-seq	219285	SAMD9L	4	ignored
RNA-seq	25851	TECPR1	4	ignored
RNA-seq	5440	POLR2K	4	ignored
RNA-seq	55074	OXR1	4	ignored
RNA-seq	54108	CHRAC1	4	ignored
RNA-seq	4061	LY6E	4	tagged
RNA-seq	23511	NUP188	4	tagged
RNA-seq	8905	AP1S2	4	ignored
RNA-seq	27336	HTATSF1	4	ignored
RNA-seq	8263	F8A1	4	ignored
RNA-seq	24149	ZNF318	3	ignored
RNA-seq	79080	CCDC86	3	tagged
RNA-seq	8514	KCNAB2	3	ignored
RNA-seq	23254	KAZN	3	ignored
RNA-seq	55160	ARHGEF10L	3	ignored
RNA-seq	7798	LUZP1	3	ignored
RNA-seq	64766	S100PBP	3	ignored
RNA-seq	127544	RNF19B	3	ignored
RNA-seq	83931	STK40	3	ignored
RNA-seq	57708	MIER1	3	tagged
RNA-seq	10964	IFI44L	3	tagged
RNA-seq	79871	RPAP2	3	ignored
RNA-seq	9673	SLC25A44	3	ignored
RNA-seq	81875	ISG20L2	3	ignored
RNA-seq	23612	PHLDA3	3	ignored
RNA-seq	51133	KCTD3	3	ignored
RNA-seq	55105	GPATCH2	3	ignored
RNA-seq	29920	PYCR2	3	ignored
RNA-seq	22884	WDR37	3	ignored
RNA-seq	22929	SEPHS1	3	ignored
RNA-seq	196740	VSTM4	3	tagged
RNA-seq	84333	PCGF5	3	ignored
RNA-seq	25956	SEC31B	3	ignored
RNA-seq	3632	INPP5A	3	ignored
RNA-seq	81490	PTDSS2	3	ignored
RNA-seq	25891	PAMR1	3	ignored
RNA-seq	9158	FIBP	3	ignored
RNA-seq	10873	ME3	3	ignored
RNA-seq	27034	ACAD8	3	ignored
RNA-seq	65981	CAPRIN2	3	ignored
RNA-seq	55716	LMBR1L	3	ignored
RNA-seq	51411	BIN2	3	tagged
RNA-seq	53831	GPR84	3	tagged
RNA-seq	64333	ARHGAP9	3	tagged
RNA-seq	196403	DTX3	3	ignored
RNA-seq	23041	MON2	3	ignored
RNA-seq	55188	RIC8B	3	ignored
RNA-seq	81617	CAB39L	3	tagged
RNA-seq	55208	DCUN1D2	3	ignored
RNA-seq	22821	RASA3	3	ignored
RNA-seq	55644	OSGEP	3	ignored
RNA-seq	29091	STXBP6	3	ignored
RNA-seq	51562	MBIP	3	ignored
RNA-seq	112752	IFT43	3	ignored
RNA-seq	23005	MAPKBP1	3	ignored
RNA-seq	10169	SERF2	3	ignored
RNA-seq	84419	C15orf48	3	ignored
RNA-seq	342035	GLDN	3	ignored
RNA-seq	64499	TPSB2	3	ignored
RNA-seq	79228	THOC6	3	ignored
RNA-seq	123879	DCUN1D3	3	ignored
RNA-seq	57610	RANBP10	3	ignored
RNA-seq	23659	PLA2G15	3	tagged
RNA-seq	25839	COG4	3	ignored
RNA-seq	55625	ZDHHC7	3	ignored
RNA-seq	22980	TCF25	3	ignored
RNA-seq	79007	DBNDD1	3	ignored
RNA-seq	51763	INPP5K	3	ignored
RNA-seq	26001	RNF167	3	ignored
RNA-seq	54799	MBTD1	3	ignored
RNA-seq	284021	MILR1	3	ignored
RNA-seq	23510	KCTD2	3	ignored
RNA-seq	8731	RNMT	3	ignored
RNA-seq	55628	ZNF407	3	ignored
RNA-seq	8175	SF3A2	3	ignored
RNA-seq	51073	MRPL4	3	ignored
RNA-seq	9592	IER2	3	ignored
RNA-seq	51477	ISYNA1	3	ignored
RNA-seq	55957	LIN37	3	ignored
RNA-seq	644096	SDHAF1	3	ignored
RNA-seq	84798	C19orf48	3	ignored
RNA-seq	9781	RNF144A	3	ignored
RNA-seq	22934	RPIA	3	ignored
RNA-seq	81562	LMAN2L	3	ignored
RNA-seq	10170	DHRS9	3	ignored
RNA-seq	9541	CIR1	3	tagged
RNA-seq	55139	ANKZF1	3	ignored
RNA-seq	8576	STK16	3	tagged
RNA-seq	51665	ASB1	3	ignored
RNA-seq	51575	ESF1	3	ignored
RNA-seq	79133	NDUFAF5	3	ignored
RNA-seq	8530	CST7	3	tagged
RNA-seq	26051	PPP1R16B	3	ignored
RNA-seq	23051	ZHX3	3	ignored
RNA-seq	85441	HELZ2	3	ignored
RNA-seq	63977	PRDM15	3	ignored
RNA-seq	25966	C2CD2	3	ignored
RNA-seq	11344	TWF2	3	ignored
RNA-seq	55008	HERC6	3	ignored
RNA-seq	27071	DAPP1	3	ignored
RNA-seq	6307	MSMO1	3	ignored
RNA-seq	83891	SNX25	3	ignored
RNA-seq	389289	ANXA2R	3	ignored
RNA-seq	23438	HARS2	3	ignored
RNA-seq	5269	SERPINB6	3	ignored
RNA-seq	57380	MRS2	3	ignored
RNA-seq	29777	ABT1	3	ignored
RNA-seq	80737	VWA7	3	ignored
RNA-seq	7629	ZNF76	3	ignored
RNA-seq	347734	SLC35B2	3	ignored
RNA-seq	55350	VNN3	3	ignored
RNA-seq	84310	C7orf50	3	ignored
RNA-seq	23386	NUDCD3	3	ignored
RNA-seq	2791	GNG11	3	ignored
RNA-seq	168451	THAP5	3	ignored
RNA-seq	64760	FAM160B2	3	ignored
RNA-seq	55893	ZNF395	3	ignored
RNA-seq	84296	GINS4	3	ignored
RNA-seq	51115	RMDN1	3	ignored
RNA-seq	22898	DENND3	3	ignored
RNA-seq	4799	NFX1	3	ignored
RNA-seq	22927	HABP4	3	ignored
RNA-seq	83549	UCK1	3	ignored
RNA-seq	29952	DPP7	3	ignored
RNA-seq	8636	SSNA1	3	tagged
RNA-seq	94056	SYAP1	3	ignored
RNA-seq	9185	REPS2	3	ignored
RNA-seq	81887	LAS1L	3	ignored
RNA-seq	1038	CDR1	3	tagged
RNA-seq	5973	RENBP	3	tagged
RNA-seq	55757	UGGT2	2	ignored
RNA-seq	148479	PHF13	2	ignored
RNA-seq	55187	VPS13D	2	ignored
RNA-seq	51042	ZNF593	2	ignored
RNA-seq	83442	SH3BGRL3	2	ignored
RNA-seq	9204	ZMYM6	2	ignored
RNA-seq	8704	B4GALT2	2	ignored
RNA-seq	51253	MRPL37	2	ignored
RNA-seq	57592	ZNF687	2	ignored
RNA-seq	6704	SPRR2E	2	tagged
RNA-seq	57198	ATP8B2	2	ignored
RNA-seq	80308	FLAD1	2	ignored
RNA-seq	25778	DSTYK	2	ignored
RNA-seq	27143	PALD1	2	ignored
RNA-seq	219654	ZCCHC24	2	ignored
RNA-seq	22984	PDCD11	2	tagged
RNA-seq	51063	CALHM2	2	ignored
RNA-seq	55760	DHX32	2	ignored
RNA-seq	53	ACP2	2	ignored
RNA-seq	51296	SLC15A3	2	ignored
RNA-seq	54663	WDR74	2	ignored
RNA-seq	65003	MRPL11	2	ignored
RNA-seq	114769	CARD16	2	tagged
RNA-seq	219899	TBCEL	2	ignored
RNA-seq	23584	VSIG2	2	tagged
RNA-seq	5763	PTMS	2	tagged
RNA-seq	338339	CLEC4D	2	tagged
RNA-seq	55711	FAR2	2	tagged
RNA-seq	5463	POU6F1	2	tagged
RNA-seq	196410	METTL7B	2	ignored
RNA-seq	9904	RBM19	2	ignored
RNA-seq	160777	CCDC60	2	ignored
RNA-seq	94240	EPSTI1	2	ignored
RNA-seq	123103	KLHL33	2	ignored
RNA-seq	10668	CGRRF1	2	ignored
RNA-seq	123096	SLC25A29	2	ignored
RNA-seq	254531	LPCAT4	2	ignored
RNA-seq	23102	TBC1D2B	2	ignored
RNA-seq	80765	STARD5	2	ignored
RNA-seq	54985	HCFC1R1	2	ignored
RNA-seq	8479	HIRIP3	2	ignored
RNA-seq	51090	PLLP	2	ignored
RNA-seq	84080	ENKD1	2	ignored
RNA-seq	83693	HSDL1	2	ignored
RNA-seq	9764	KIAA0513	2	ignored
RNA-seq	92521	SPECC1	2	tagged
RNA-seq	2124	EVI2B	2	ignored
RNA-seq	29916	SNX11	2	ignored
RNA-seq	80221	ACSF2	2	ignored
RNA-seq	9382	COG1	2	ignored
RNA-seq	439921	MXRA7	2	ignored
RNA-seq	124512	METTL23	2	ignored
RNA-seq	339230	CCDC137	2	ignored
RNA-seq	284001	CCDC57	2	ignored
RNA-seq	9050	PSTPIP2	2	ignored
RNA-seq	22850	ADNP2	2	ignored
RNA-seq	6618	SNAPC2	2	ignored
RNA-seq	6234	RPS28	2	tagged
RNA-seq	90379	DCAF15	2	ignored
RNA-seq	27151	CPAMD8	2	ignored
RNA-seq	27106	ARRDC2	2	ignored
RNA-seq	23031	MAST3	2	ignored
RNA-seq	170463	SSBP4	2	ignored
RNA-seq	54958	TMEM160	2	ignored
RNA-seq	587	BCAT2	2	ignored
RNA-seq	79168	LILRA6	2	ignored
RNA-seq	353514	LILRA5	2	ignored
RNA-seq	9422	ZNF264	2	ignored
RNA-seq	64342	HS1BP3	2	ignored
RNA-seq	55133	SRBD1	2	tagged
RNA-seq	10438	C1D	2	ignored
RNA-seq	10120	ACTR1B	2	ignored
RNA-seq	84620	ST6GAL2	2	ignored
RNA-seq	55627	SMPD4	2	ignored
RNA-seq	93349	SP140L	2	ignored
RNA-seq	25943	C20orf194	2	ignored
RNA-seq	85379	KIAA1671	2	ignored
RNA-seq	113791	PIK3IP1	2	ignored
RNA-seq	253143	PRR14L	2	ignored
RNA-seq	129138	ANKRD54	2	ignored
RNA-seq	1849	DUSP7	2	ignored
RNA-seq	132160	PPM1M	2	ignored
RNA-seq	55830	GLT8D1	2	ignored
RNA-seq	80325	ABTB1	2	ignored
RNA-seq	152992	TRMT44	2	ignored
RNA-seq	54876	DCAF16	2	ignored
RNA-seq	22902	RUFY3	2	ignored
RNA-seq	27309	ZNF330	2	ignored
RNA-seq	201799	TMEM154	2	ignored
RNA-seq	55601	DDX60	2	ignored
RNA-seq	91351	DDX60L	2	ignored
RNA-seq	133418	EMB	2	tagged
RNA-seq	84240	ZCCHC9	2	ignored
RNA-seq	84418	CYSTM1	2	tagged
RNA-seq	10307	APBB3	2	tagged
RNA-seq	51294	PCDH12	2	ignored
RNA-seq	80741	LY6G5C	2	ignored
RNA-seq	222658	KCTD20	2	ignored
RNA-seq	116138	KLHDC3	2	ignored
RNA-seq	55227	LRRC1	2	ignored
RNA-seq	57579	FAM135A	2	ignored
RNA-seq	9324	HMGN3	2	ignored
RNA-seq	60487	TRMT11	2	tagged
RNA-seq	80177	MYCT1	2	ignored
RNA-seq	26173	INTS1	2	ignored
RNA-seq	100101267	POM121C	2	ignored
RNA-seq	57414	RHBDD2	2	ignored
RNA-seq	113878	DTX2	2	ignored
RNA-seq	79161	TMEM243	2	ignored
RNA-seq	23660	ZKSCAN5	2	ignored
RNA-seq	7551	ZNF3	2	ignored
RNA-seq	29990	PILRB	2	ignored
RNA-seq	27147	DENND2A	2	ignored
RNA-seq	8427	ZNF282	2	ignored
RNA-seq	474344	GIMAP6	2	ignored
RNA-seq	116988	AGAP3	2	ignored
RNA-seq	203069	R3HCC1	2	ignored
RNA-seq	25879	DCAF13	2	ignored
RNA-seq	55667	DENND4C	2	ignored
RNA-seq	3443	IFNA6	2	ignored
RNA-seq	60560	NAA35	2	ignored
RNA-seq	64768	IPPK	2	ignored
RNA-seq	23424	TDRD7	2	ignored
RNA-seq	26130	GAPVD1	2	ignored
RNA-seq	8227	AKAP17A	2	ignored
RNA-seq	2710	GK	2	tagged
RNA-seq	92745	SLC38A5	2	ignored
RNA-seq	100131755	ARMCX4	2	ignored
RNA-seq	51439	FAM8A1	1	ignored
RNA-seq	29066	ZC3H7A	1	ignored
RNA-seq	10199	MPHOSPH10	1	tagged
RNA-seq	55229	PANK4	1	ignored
RNA-seq	49856	WRAP73	1	ignored
RNA-seq	57470	LRRC47	1	ignored
RNA-seq	57185	NIPAL3	1	ignored
RNA-seq	23585	TMEM50A	1	ignored
RNA-seq	54952	TRNAU1AP	1	ignored
RNA-seq	148932	MOB3C	1	ignored
RNA-seq	54432	YIPF1	1	ignored
RNA-seq	2635	GBP3	1	ignored
RNA-seq	115361	GBP4	1	tagged
RNA-seq	353133	LCE1C	1	ignored
RNA-seq	7059	THBS3	1	ignored
RNA-seq	128308	MRPL55	1	ignored
RNA-seq	2987	GUK1	1	ignored
RNA-seq	118924	FRA10AC1	1	ignored
RNA-seq	118788	PIK3AP1	1	ignored
RNA-seq	84067	FAM160A2	1	ignored
RNA-seq	23220	DTX4	1	ignored
RNA-seq	440068	CARD17	1	tagged
RNA-seq	143884	CWF19L2	1	ignored
RNA-seq	54733	SLC35F2	1	ignored
RNA-seq	51267	CLEC1A	1	ignored
RNA-seq	140461	ASB8	1	ignored
RNA-seq	84926	SPRYD3	1	ignored
RNA-seq	25946	ZNF385A	1	ignored
RNA-seq	121355	GTSF1	1	ignored
RNA-seq	83591	THAP2	1	ignored
RNA-seq	51184	GPN3	1	ignored
RNA-seq	54621	VSIG10	1	ignored
RNA-seq	57696	DDX55	1	ignored
RNA-seq	387496	RASL11A	1	ignored
RNA-seq	84935	MEDAG	1	ignored
RNA-seq	57213	SPRYD7	1	ignored
RNA-seq	5875	RABGGTA	1	ignored
RNA-seq	55015	PRPF39	1	ignored
RNA-seq	6166	RPL36AL	1	ignored
RNA-seq	26030	PLEKHG3	1	ignored
RNA-seq	23357	ANGEL1	1	ignored
RNA-seq	317762	CCDC85C	1	ignored
RNA-seq	115708	TRMT61A	1	ignored
RNA-seq	84936	ZFYVE19	1	ignored
RNA-seq	4236	MFAP1	1	ignored
RNA-seq	51496	CTDSPL2	1	ignored
RNA-seq	348094	ANKDD1A	1	ignored
RNA-seq	91860	CALML4	1	ignored
RNA-seq	400451	FAM174B	1	ignored
RNA-seq	90864	SPSB3	1	ignored
RNA-seq	84256	FLYWCH1	1	ignored
RNA-seq	10127	ZNF263	1	ignored
RNA-seq	6345	SRL	1	ignored
RNA-seq	79091	METTL22	1	ignored
RNA-seq	57478	USP31	1	ignored
RNA-seq	83719	YPEL3	1	ignored
RNA-seq	29100	TMEM208	1	ignored
RNA-seq	23174	ZCCHC14	1	ignored
RNA-seq	29	ABR	1	tagged
RNA-seq	55720	TSR1	1	tagged
RNA-seq	23140	ZZEF1	1	ignored
RNA-seq	23125	CAMTA2	1	ignored
RNA-seq	10750	GRAP	1	ignored
RNA-seq	54475	NLE1	1	ignored
RNA-seq	26151	NAT9	1	ignored
RNA-seq	79157	MFSD11	1	tagged
RNA-seq	147463	ANKRD29	1	ignored
RNA-seq	5064	PALM	1	tagged
RNA-seq	10501	SEMA6B	1	ignored
RNA-seq	126328	NDUFA11	1	ignored
RNA-seq	79085	SLC25A23	1	ignored
RNA-seq	90592	ZNF700	1	ignored
RNA-seq	26017	FAM32A	1	ignored
RNA-seq	115098	CCDC124	1	tagged
RNA-seq	93436	ARMC6	1	ignored
RNA-seq	84807	NFKBID	1	ignored
RNA-seq	92285	ZNF585B	1	ignored
RNA-seq	57622	LRFN1	1	ignored
RNA-seq	29946	SERTAD3	1	ignored
RNA-seq	7711	ZNF155	1	ignored
RNA-seq	284371	ZNF841	1	ignored
RNA-seq	55769	ZNF83	1	ignored
RNA-seq	90338	ZNF160	1	ignored
RNA-seq	352909	DNAAF3	1	tagged
RNA-seq	390980	ZNF805	1	ignored
RNA-seq	79744	ZNF419	1	ignored
RNA-seq	65982	ZSCAN18	1	ignored
RNA-seq	130557	ZNF513	1	ignored
RNA-seq	65124	SOWAHC	1	ignored
RNA-seq	150465	TTL	1	ignored
RNA-seq	80097	MZT2B	1	ignored
RNA-seq	9360	PPIG	1	tagged
RNA-seq	29926	GMPPA	1	ignored
RNA-seq	25992	SNED1	1	ignored
RNA-seq	79175	ZNF343	1	ignored
RNA-seq	7692	ZNF133	1	ignored
RNA-seq	140856	SCP2D1	1	ignored
RNA-seq	955	ENTPD6	1	ignored
RNA-seq	140699	MROH8	1	ignored
RNA-seq	9875	URB1	1	ignored
RNA-seq	5822	PWP2	1	ignored
RNA-seq	83606	GUCD1	1	ignored
RNA-seq	4242	MFNG	1	ignored
RNA-seq	27341	RRP7A	1	ignored
RNA-seq	23313	KIAA0930	1	ignored
RNA-seq	80305	TRABD	1	ignored
RNA-seq	92999	ZBTB47	1	ignored
RNA-seq	51385	ZNF589	1	ignored
RNA-seq	51368	TEX264	1	ignored
RNA-seq	201627	DENND6A	1	ignored
RNA-seq	57461	ISY1	1	ignored
RNA-seq	80723	SLC35G2	1	ignored
RNA-seq	53829	P2RY13	1	tagged
RNA-seq	9175	MAP3K13	1	ignored
RNA-seq	64108	RTP4	1	ignored
RNA-seq	131540	ZDHHC19	1	ignored
RNA-seq	401152	C4orf3	1	ignored
RNA-seq	90441	ZNF622	1	ignored
RNA-seq	140890	SREK1	1	ignored
RNA-seq	56929	FEM1C	1	ignored
RNA-seq	51306	FAM13B	1	tagged
RNA-seq	202052	DNAJC18	1	ignored
RNA-seq	51491	NOP16	1	ignored
RNA-seq	10385	BTN2A2	1	ignored
RNA-seq	80742	PRR3	1	tagged
RNA-seq	285852	TREML4	1	ignored
RNA-seq	285855	RPL7L1	1	ignored
RNA-seq	83443	SF3B5	1	ignored
RNA-seq	115330	GPR146	1	ignored
RNA-seq	79034	C7orf26	1	ignored
RNA-seq	353345	GPR141	1	ignored
RNA-seq	54606	DDX56	1	ignored
RNA-seq	9238	TBRG4	1	ignored
RNA-seq	84124	ZNF394	1	ignored
RNA-seq	168455	CCDC71L	1	ignored
RNA-seq	22797	TFEC	1	ignored
RNA-seq	29062	WDR91	1	ignored
RNA-seq	168537	GIMAP7	1	ignored
RNA-seq	28959	TMEM176B	1	ignored
RNA-seq	155435	RBM33	1	tagged
RNA-seq	9242	MSC	1	tagged
RNA-seq	55039	TRMT12	1	ignored
RNA-seq	50626	CYHR1	1	ignored
RNA-seq	9925	ZBTB5	1	ignored
RNA-seq	55035	NOL8	1	ignored
RNA-seq	403341	ZBTB34	1	ignored
RNA-seq	138428	PTRH1	1	ignored
RNA-seq	27090	ST6GALNAC4	1	ignored
RNA-seq	140459	ASB6	1	ignored
RNA-seq	85014	TMEM141	1	ignored
[truncated: 113 more rows]
